# Supplementary material for: Analysis of pfhrp2 genetic diversity in Senegal and implications for use of rapid diagnostic tests
Source: Malar J. 2014 Jan 29;13:34. doi: 10.1186/1475-2875-13-34 (PMC3913323; doi:10.1186/1475-2875-13-34)
Supplement: Additional file 1 — Polymorphic position in the pfhrp2 gene. The positions of the SNPs identified are showed. The Table contains information about the SNP types, the description of the gene where the SNP is located, the position of the SNPs, the possible alternative alleles, the minor allele frequency, and the call rate. A total of 67 polymorphisms were identified, one per row, among Senegal, Mali and Uganda isolates. These polymorphisms include SNPs and indels. The indels position is reported as the position before the insertion/deletion point, and the base before it is repeated. The first letter in the isolate names indicates the site of collection (P for Pikine; V for Velingara; and, T for Thies), and the last two digits in the isolate names indicate the year of collection (e.g., P05.02 was isolated in 2002). [file 1475-2875-13-34-S1.xlsx]

## Sheet: Additional File 1
#gene	desc	chr	pos	effect	impact	protein_pos	residue_ref	residue_alt	allele_minor	allele_ref	allele_alt	call_rate	mac	maf	Mali_PS096	Mali_PS097	Mali_PS103	Mali_PS122_G11	Mali_PS149	Mali_PS170	Mali_PS183	Mali_PS186	Mali_PS189	Mali_PS206_E11	Mali_PS250	SenP005.02.c	SenP008.04.c	SenP009.04.c	SenP011.02.c	SenP019.04.c	SenP026.04.c	SenP027.02.c	SenP031.01.c	SenP051.02.c	SenP060.02.c	SenT002.09.c	SenT010.04_D10.c	SenT015.04.c	SenT015.09.c	SenT021.09.c	SenT026.04.c	SenT028.04.c	SenT029.09.c	SenT032.09.c	SenT033.09.c	SenT042.09.c	SenT046.09.c	SenT047.09.c	SenT074.08.c
PF3D7_0831800	histidine-rich protein II (HRPII)	Pf3D7_08_v3	1374269	NON_SYNONYMOUS_CODING	MODERATE	295	H	Q	T	G	T	0.985294	1	0.00746269	G	G	G	G	G	G	G	G	G	G	T	G	G		G	G		G	G	G	G	G	G	G	G	G	G	G	G	G	G	G	G	G	G
PF3D7_0831800	histidine-rich protein II (HRPII)	Pf3D7_08_v3	1374284	SYNONYMOUS_CODING	LOW	290	H		A	G	A	0.816176	12	0.108108			G	G	G	G	G	G	G	G		G	G		G	G		G	G	G	G	G	G	G	G	G	A	G	G	A	G	G	G	G	G
PF3D7_0831800	histidine-rich protein II (HRPII)	Pf3D7_08_v3	1374293	SYNONYMOUS_CODING	LOW	287	T		A	G	A	0.779412	14	0.132075		G		G	G	G	G	G		G	G	A			A	G		A	A	G	G	G		G	G			A	G	G	G	G	G	G	A
PF3D7_0831800	histidine-rich protein II (HRPII)	Pf3D7_08_v3	1374295	NON_SYNONYMOUS_CODING	MODERATE	287	T	A	C	T	C	0.713235	9	0.0927835		T		T	T	T	T	T		T		T	T			T		T		T		T	T	T	T		C	T	T		T		T	T	T
PF3D7_0831800	histidine-rich protein II (HRPII)	Pf3D7_08_v3	1374305	SYNONYMOUS_CODING	LOW	283	A		A	T	A	0.602941	12	0.146341		T		T	T	T	T		T			T	T		T	T		T	T	T	A		T	T				T	T	A	T			T	T
PF3D7_0831800	histidine-rich protein II (HRPII)	Pf3D7_08_v3	1374306	CODON_CHANGE_PLUS_CODON_INSERTION	MODERATE	282	A	AI	GCATCGGCTGCATGGTGAG	GCGGCTGCATGGTGAG	GCATCGGCTGCATGGTGAG	0.889706	3	0.0247934	GCGGCTGCATGGTGAG	GCGGCTGCATGGTGAG	GCGGCTGCATGGTGAG	GCGGCTGCATGGTGAG	GCGGCTGCATGGTGAG	GCGGCTGCATGGTGAG	GCGGCTGCATGGTGAG	GCGGCTGCATGGTGAG	GCGGCTGCATGGTGAG	GCGGCTGCATGGTGAG	GCGGCTGCATGGTGAG	GCGGCTGCATGGTGAG	GCGGCTGCATGGTGAG		GCGGCTGCATGGTGAG	GCGGCTGCATGGTGAG		GCGGCTGCATGGTGAG		GCGGCTGCATGGTGAG		GCGGCTGCATGGTGAG	GCGGCTGCATGGTGAG	GCGGCTGCATGGTGAG	GCGGCTGCATGGTGAG	GCGGCTGCATGGTGAG		GCGGCTGCATGGTGAG	GCGGCTGCATGGTGAG	GCATCGGCTGCATGGTGAG	GCGGCTGCATGGTGAG	GCGGCTGCATGGTGAG	GCGGCTGCATGGTGAG	GCGGCTGCATGGTGAG	GCGGCTGCATGGTGAG
PF3D7_0831800	histidine-rich protein II (HRPII)	Pf3D7_08_v3	1374307	NON_SYNONYMOUS_CODING	MODERATE	283	A	T	T	C	T	0.867647	4	0.0338983	C	C	C	C	C	T	C	C	C	C	C	C	C		C	C		C	C	C		C	C	C	C	C		C	C	C	C	C	C	C	C
PF3D7_0831800	histidine-rich protein II (HRPII)	Pf3D7_08_v3	1374308	CODON_CHANGE_PLUS_CODON_DELETION	MODERATE	280	HAA	H	G	GGCTGCA	G	0.852941	2	0.0172414	GGCTGCA	GGCTGCA	GGCTGCA	GGCTGCA	GGCTGCA	GGCTGCA	GGCTGCA	GGCTGCA	GGCTGCA	GGCTGCA	GGCTGCA	GGCTGCA	GGCTGCA		GGCTGCA	GGCTGCA		GGCTGCA		GGCTGCA		GGCTGCA	GGCTGCA	GGCTGCA	GGCTGCA	GGCTGCA		GGCTGCA	GGCTGCA	GGCTGCA	GGCTGCA	GGCTGCA	GGCTGCA	GGCTGCA	GGCTGCA
PF3D7_0831800	histidine-rich protein II (HRPII)	Pf3D7_08_v3	1374310	NON_SYNONYMOUS_CODING	MODERATE	282	A	T	T	C	T	0.779412	1	0.00943396	C	C	C	C	C	C	C	C	C	C	C	C	C		C	C		C	C	C	T		C	C	C	C		C	C		C	C	C	C	C
PF3D7_0831800	histidine-rich protein II (HRPII)	Pf3D7_08_v3	1374310	CODON_INSERTION	MODERATE	281	A	ALMLTMQ	CTGCATGGTGAGCATCAGT	C	CTGCATGGTGAGCATCAGT	0.0441176	1	0.166667
PF3D7_0831800	histidine-rich protein II (HRPII)	Pf3D7_08_v3	1374317	SYNONYMOUS_CODING	LOW	279	H		A	G	A	0.470588	5	0.078125		G			G	G	G			G	G		G			G				G	G			G							G		G	G
PF3D7_0831800	histidine-rich protein II (HRPII)	Pf3D7_08_v3	1374326	SYNONYMOUS_CODING	LOW	276	T		G	A	G	0.544118	22	0.297297		A			A	A	A	G					A			A			A	A	A		A	A	G						A		A	A
PF3D7_0831800	histidine-rich protein II (HRPII)	Pf3D7_08_v3	1374328	NON_SYNONYMOUS_CODING	MODERATE	276	T	A	C	T	C	0.514706	1	0.0142857		T			T	T	T			T			T		T	T			T	T	T		T	T							T	T	T	T	T
PF3D7_0831800	histidine-rich protein II (HRPII)	Pf3D7_08_v3	1374338	SYNONYMOUS_CODING	LOW	272	A		A	T	A	0.389706	1	0.0188679	A	T			T	T	T						T		T	T			T	T	T		T	T							T			T	T
PF3D7_0831800	histidine-rich protein II (HRPII)	Pf3D7_08_v3	1374361	NON_SYNONYMOUS_CODING	MODERATE	265	A	T	T	C	T	0.816176	2	0.018018	C	C	C	C	C	C	C		C	C					C	C		C	C	C	C			C	C			C	C	C	C	C	C	C	C
PF3D7_0831800	histidine-rich protein II (HRPII)	Pf3D7_08_v3	1374374	SYNONYMOUS_CODING	LOW	260	H		A	G	A	0.419118	2	0.0350877	G	G		G	G	G	G			G					G			G	G	G	G			G		G							G	G	G
PF3D7_0831800	histidine-rich protein II (HRPII)	Pf3D7_08_v3	1374374	CODON_CHANGE_PLUS_CODON_INSERTION	MODERATE	260	H	LQH	GGCTGCA	G	GGCTGCA	0.191176	1	0.0384615
PF3D7_0831800	histidine-rich protein II (HRPII)	Pf3D7_08_v3	1374377	CODON_CHANGE_PLUS_CODON_DELETION	MODERATE	253	HHATDAH	H	A	ATGAGCATCGGTTGCATGG	A	0.772059	3	0.0285714	ATGAGCATCGGTTGCATGG	ATGAGCATCGGTTGCATGG	ATGAGCATCGGTTGCATGG	A	ATGAGCATCGGTTGCATGG	ATGAGCATCGGTTGCATGG	ATGAGCATCGGTTGCATGG		ATGAGCATCGGTTGCATGG	ATGAGCATCGGTTGCATGG					ATGAGCATCGGTTGCATGG			ATGAGCATCGGTTGCATGG	ATGAGCATCGGTTGCATGG	ATGAGCATCGGTTGCATGG	ATGAGCATCGGTTGCATGG	ATGAGCATCGGTTGCATGG	ATGAGCATCGGTTGCATGG	ATGAGCATCGGTTGCATGG	ATGAGCATCGGTTGCATGG	ATGAGCATCGGTTGCATGG			ATGAGCATCGGTTGCATGG		ATGAGCATCGGTTGCATGG	ATGAGCATCGGTTGCATGG	ATGAGCATCGGTTGCATGG	ATGAGCATCGGTTGCATGG	ATGAGCATCGGTTGCATGG
PF3D7_0831800	histidine-rich protein II (HRPII)	Pf3D7_08_v3	1374388	NON_SYNONYMOUS_CODING	MODERATE	256	T	A	C	T	C	0.235294	7	0.21875					C			T												T	T			T	T		T	T						T
PF3D7_0831800	histidine-rich protein II (HRPII)	Pf3D7_08_v3	1374413	SYNONYMOUS_CODING	LOW	247	H		A	G	A	0.625	2	0.0235294	G			G		G	G	G	G		G	G				A		G		G	G		G	G	G	G	G		G			G	G	G	G
PF3D7_0831800	histidine-rich protein II (HRPII)	Pf3D7_08_v3	1374419	SYNONYMOUS_CODING	LOW	245	H		A	G	A	0.713235	4	0.0412371	G			G					G		G	G			G	G		G		G	G		G	G	G		G	G	G	G		G		G	G
PF3D7_0831800	histidine-rich protein II (HRPII)	Pf3D7_08_v3	1374458	SYNONYMOUS_CODING	LOW	232	H		A	G	A	0.294118	2	0.05	G	A					G				G					G				A				G					G		G		G	G
PF3D7_0831800	histidine-rich protein II (HRPII)	Pf3D7_08_v3	1374467	SYNONYMOUS_CODING	LOW	229	A		A	G	A	0.588235	1	0.0125	G			G	G	G	G			G	G	G			G	G		G	G	A	G	G		G					G	G	G		G		G
PF3D7_0831800	histidine-rich protein II (HRPII)	Pf3D7_08_v3	1374476	SYNONYMOUS_CODING	LOW	226	H		G	A	G	0.132353	5	0.277778						A	G													A		A
PF3D7_0831800	histidine-rich protein II (HRPII)	Pf3D7_08_v3	1374487	NON_SYNONYMOUS_CODING	MODERATE	223	A	S;T	A,T	C	T,A	0.286765	4	0.102564						T	C		C		C	C			C			C				C	C	C			C			C				C	C
PF3D7_0831800	histidine-rich protein II (HRPII)	Pf3D7_08_v3	1374494	SYNONYMOUS_CODING	LOW	220	H		G	A	G	0.294118	2	0.05			A				A		A			A	A		A			A	A	A	A			A						A
PF3D7_0831800	histidine-rich protein II (HRPII)	Pf3D7_08_v3	1374503	SYNONYMOUS_CODING	LOW	217	T		A	G	A	0.882353	1	0.00833333	G		G	G	G	G	G	G	G	G	G	G	G		G	G		G	G	G	G	G	G	G	G	G	G	G	G		G	G	G	A	G
PF3D7_0831800	histidine-rich protein II (HRPII)	Pf3D7_08_v3	1374505	NON_SYNONYMOUS_CODING	MODERATE	217	T	A	C	T	C	0.448529	12	0.196721	T						T	T	T	T	T	T			T	T		T	T	T	T	T		T						C			C	C	T
PF3D7_0831800	histidine-rich protein II (HRPII)	Pf3D7_08_v3	1374512	SYNONYMOUS_CODING	LOW	214	H		A	G	A	0.676471	5	0.0543478	G	G				G	G	G	G	G	G	G	G		G	G		G	G	G	G		G	G	G	G	G	G			G	G			G
PF3D7_0831800	histidine-rich protein II (HRPII)	Pf3D7_08_v3	1374521	SYNONYMOUS_CODING	LOW	211	A		A	G	A	0.867647	4	0.0338983	G	G		G	G	G	G	G	G	G	G	G			G	G	G	G	G	G	G	G	G	G		G	G	G	G	G	G	G	G		G
PF3D7_0831800	histidine-rich protein II (HRPII)	Pf3D7_08_v3	1374539	SYNONYMOUS_CODING	LOW	205	A		G	A	G	0.617647	13	0.154762	A	A			A	A	A	A	A		A	A	A		A	A	A	A	A		A		A	A			A	G		A					A
PF3D7_0831800	histidine-rich protein II (HRPII)	Pf3D7_08_v3	1374541	NON_SYNONYMOUS_CODING	MODERATE	205	A	S	A	C	A	0.860294	3	0.025641	C	C		C	C	C	C	C	C		C	C	C		C	C	C	C	C	C	C	C	C	C		C	C	C	C	C	C	C	C	C	C
PF3D7_0831800	histidine-rich protein II (HRPII)	Pf3D7_08_v3	1374554	SYNONYMOUS_CODING	LOW	200	H		A	G	A	0.816176	1	0.00900901	G	G		G	G	G	G	G	G	G	G	G	G	G	G	G	G	G	G	G	G		G	G		G	G	A	G	G	G	G	G		G
PF3D7_0831800	histidine-rich protein II (HRPII)	Pf3D7_08_v3	1374565	NON_SYNONYMOUS_CODING	MODERATE	197	Y	D	C	A	C	0.757353	3	0.0291262	A	A			A	A	A		A	A	A	A	A	A	A	A	A	A	A	A	A		A	A	A		A		A	A	A	A	A	C	A
PF3D7_0831800	histidine-rich protein II (HRPII)	Pf3D7_08_v3	1374566	SYNONYMOUS_CODING	LOW	196	A		G	A	G	0.779412	1	0.00943396	A	A		A	A	A	A	A	A	A	A	A	A	A	A	A	A	A	A	A	A		A	A		A	A	G	A	A	A	A	A		A
PF3D7_0831800	histidine-rich protein II (HRPII)	Pf3D7_08_v3	1374584	SYNONYMOUS_CODING	LOW	190	A		G	A	G	0.75	5	0.0490196	A		A	A	A	A	A	A	A	A	A	A	A	A	A	A	A	A	A	A	A		A	A		A	A		A	A	A	A	A	A	A
PF3D7_0831800	histidine-rich protein II (HRPII)	Pf3D7_08_v3	1374586	NON_SYNONYMOUS_CODING	MODERATE	190	A	T	T	C	T	0.882353	1	0.00833333	C	C	C	C	C	C	C	C	C	C	C	C	C	C	C	C	C	C	C	C	C		C	C	C	C	C	C	C	C	C	C	C	C	C
PF3D7_0831800	histidine-rich protein II (HRPII)	Pf3D7_08_v3	1374601	NON_SYNONYMOUS_CODING	MODERATE	185	D	Y	A	C	A	0.926471	1	0.00793651	C	C	C	C	C	C	C	C	C		C	C	C	C	C	C	C	C		C	C	C	C	C	C	C	C	C	C	C	C	C	C	C	C
PF3D7_0831800	histidine-rich protein II (HRPII)	Pf3D7_08_v3	1374602	SYNONYMOUS_CODING	LOW	184	S		A	G	A	0.727941	2	0.020202	G		G		G	G	G		G		G	G		G	G	G	G	G			G		G	G	G	G	G	G	G	G	G	G	G		G
PF3D7_0831800	histidine-rich protein II (HRPII)	Pf3D7_08_v3	1374604	NON_SYNONYMOUS_CODING	MODERATE	184	S	A	C	A	C	0.514706	17	0.242857					A	A	A					A		A	A	A	A		C		A		A	A	A	A	A			A		A	A	C
PF3D7_0831800	histidine-rich protein II (HRPII)	Pf3D7_08_v3	1374617	SYNONYMOUS_CODING	LOW	179	H		G	A	G	0.897059	1	0.00819672	A	G	A	A	A	A	A	A	A	A	A	A			A	A	A	A	A	A	A		A	A	A	A	A	A	A	A	A	A	A	A	A
PF3D7_0831800	histidine-rich protein II (HRPII)	Pf3D7_08_v3	1374628	NON_SYNONYMOUS_CODING	MODERATE	176	Y	D	C	A	C	0.602941	18	0.219512	A	A		C	A		A		A	C		A		A	A	A	A	A	A	C	A	C	A	A	A		A	A	A	A		A		C	A
PF3D7_0831800	histidine-rich protein II (HRPII)	Pf3D7_08_v3	1374671	SYNONYMOUS_CODING	LOW	161	H		A	G	A	0.705882	1	0.0104167	G		G	G	G	G	G		G		G	G			G	G		G	G		G	G	G	G		G	G	G		G	G	G	G		G
PF3D7_0831800	histidine-rich protein II (HRPII)	Pf3D7_08_v3	1374677	SYNONYMOUS_CODING	LOW	159	A		G	A	G	0.772059	1	0.00952381	A		A	A	A	A	A		A	A	A	A			A	A		A	A	A	A	A	A	A		A	A	A		A	A	A	A		A
PF3D7_0831800	histidine-rich protein II (HRPII)	Pf3D7_08_v3	1374683	SYNONYMOUS_CODING	LOW	157	A		G	A	G	0.617647	4	0.047619		A		A	A	A	A		A	A	A	A			A	G			A		A	G	A	A		A	A	A				A	A	A
PF3D7_0831800	histidine-rich protein II (HRPII)	Pf3D7_08_v3	1374692	SYNONYMOUS_CODING	LOW	154	H		A	G	A	0.191176	1	0.0384615									G			G			G			G			G		G	G			G	G				G
PF3D7_0831800	histidine-rich protein II (HRPII)	Pf3D7_08_v3	1374709	NON_SYNONYMOUS_CODING	MODERATE	149	D	Y	A	C	A	0.882353	1	0.00833333	C	C		C	C	C	C	C	C	C	C	C			C			C		C	C	C	C	C		C	C	C	C	C	C	C	C	C	C
PF3D7_0831800	histidine-rich protein II (HRPII)	Pf3D7_08_v3	1374725	SYNONYMOUS_CODING	LOW	143	H		A	G	A	0.5	2	0.0294118				G		G		G	G	G		G	G		G			G	G	G	G	G	G	G	G	G	G	G					G		G
PF3D7_0831800	histidine-rich protein II (HRPII)	Pf3D7_08_v3	1374731	SYNONYMOUS_CODING	LOW	141	A		G	A	G	0.397059	2	0.037037								A	A		A	A	A		A			A	A	A	A	A	A	A			A	A			A	A			A
PF3D7_0831800	histidine-rich protein II (HRPII)	Pf3D7_08_v3	1374737	SYNONYMOUS_CODING	LOW	139	A		G	A	G	0.308824	1	0.0238095								A	A		A	A	A		A				A	A	A		A	A			A	A						A
PF3D7_0831800	histidine-rich protein II (HRPII)	Pf3D7_08_v3	1374746	SYNONYMOUS_CODING	LOW	136	H		A	G	A	0.455882	1	0.016129			G	G				G	G	G	G	G	G					G	G	G		G	G	G		G	G	G			G		G	G	G
PF3D7_0831800	histidine-rich protein II (HRPII)	Pf3D7_08_v3	1374779	SYNONYMOUS_CODING	LOW	125	H		G	G	A	0.176471	4	0.166667		A			A				A			A																A
PF3D7_0831800	histidine-rich protein II (HRPII)	Pf3D7_08_v3	1374785	SYNONYMOUS_CODING	LOW	123	A		A	G	A	0.544118	1	0.0135135		G	G	G	G	G		G	G	G	G												G	G	G	G	G	G			G			G
PF3D7_0831800	histidine-rich protein II (HRPII)	Pf3D7_08_v3	1374794	CODON_CHANGE_PLUS_CODON_DELETION	MODERATE	117	AHHA	A	T	TGCATGGTGA	T	0.867647	1	0.00847458	TGCATGGTGA	TGCATGGTGA	TGCATGGTGA	TGCATGGTGA	TGCATGGTGA	TGCATGGTGA	TGCATGGTGA	TGCATGGTGA	TGCATGGTGA	TGCATGGTGA	TGCATGGTGA	TGCATGGTGA	TGCATGGTGA		TGCATGGTGA			TGCATGGTGA		TGCATGGTGA	TGCATGGTGA	TGCATGGTGA	TGCATGGTGA	TGCATGGTGA	TGCATGGTGA	TGCATGGTGA	TGCATGGTGA	TGCATGGTGA	TGCATGGTGA	TGCATGGTGA	TGCATGGTGA	TGCATGGTGA	TGCATGGTGA	TGCATGGTGA	TGCATGGTGA
PF3D7_0831800	histidine-rich protein II (HRPII)	Pf3D7_08_v3	1374800	SYNONYMOUS_CODING	LOW	118	H		G	G	A	0.294118	9	0.225		A				A		A	A									G						G				A
PF3D7_0831800	histidine-rich protein II (HRPII)	Pf3D7_08_v3	1374803	SYNONYMOUS_CODING	LOW	117	A		T	A	T	0.713235	1	0.0103093	A	A	A	A	A	A	A	A	A	A	A		A		A			A		A		A		A	A	A	A		A	A	A	A	A	A	A
PF3D7_0831800	histidine-rich protein II (HRPII)	Pf3D7_08_v3	1374806	SYNONYMOUS_CODING	LOW	116	H		G	A	G	0.375	2	0.0392157	A	A		A	A								A		G					A	G			A	A					A		A		A
PF3D7_0831800	histidine-rich protein II (HRPII)	Pf3D7_08_v3	1374807	FRAME_SHIFT	HIGH				TCG	T	TCG	0.772059	1	0.00952381	T	T	T	T	T	T	T	T	T	T	T		T					T		T		T		T	T	T			T	T	T	T	T	T	T
PF3D7_0831800	histidine-rich protein II (HRPII)	Pf3D7_08_v3	1374809	NON_SYNONYMOUS_CODING	MODERATE	115	H	Q	C	A	C	0.352941	1	0.0208333		A					A		A		A		A							A				A							A		A	A
PF3D7_0831800	histidine-rich protein II (HRPII)	Pf3D7_08_v3	1374810	FRAME_SHIFT	HIGH				T	TGA	T	0.698529	1	0.0105263	TGA	TGA	TGA	TGA	TGA	TGA	TGA	TGA	TGA	TGA	TGA		TGA					TGA				TGA		TGA		TGA			TGA		TGA	TGA	TGA	TGA	TGA
PF3D7_0831800	histidine-rich protein II (HRPII)	Pf3D7_08_v3	1374812	CODON_CHANGE_PLUS_CODON_DELETION	MODERATE	111	AHHA	A	A	AGCATGATGG	A	0.441176	1	0.0166667	AGCATGATGG	AGCATGATGG		AGCATGATGG				AGCATGATGG	AGCATGATGG	AGCATGATGG	AGCATGATGG		AGCATGATGG		AGCATGATGG			AGCATGATGG			AGCATGATGG	AGCATGATGG		AGCATGATGG					AGCATGATGG		AGCATGATGG	AGCATGATGG		AGCATGATGG
PF3D7_0831800	histidine-rich protein II (HRPII)	Pf3D7_08_v3	1374935	SYNONYMOUS_CODING	LOW	73	A		A	G	A	0.919118	1	0.008	G	G	G	G	G	G	G	G	G	G	G	G	G		G	G		G	G	G	G	G	G	G	G	G	G	G	G	G	G	G	G	G	G
PF3D7_0831800	histidine-rich protein II (HRPII)	Pf3D7_08_v3	1374939	NON_SYNONYMOUS_CODING	MODERATE	72	V	A	G	A	G	0.889706	6	0.0495868	A	A	A	A	A	A	A	A	A	A	A	A			A	A		A	A	A	G	A	A	A	A	A	A	A	A	A	A	A	A	A	A
PF3D7_0831800	histidine-rich protein II (HRPII)	Pf3D7_08_v3	1374966	NON_SYNONYMOUS_CODING	MODERATE	63	V	A	G	A	G	0.977941	1	0.0075188	A	A	A	A	A	A	A	A	A	A		A	A	A	A	A	A	A	A	A	A	A	A	A	A	A	A	A	A	A	A	A	A	A	A
PF3D7_0831800	histidine-rich protein II (HRPII)	Pf3D7_08_v3	1375143	INTRON	MODIFIER				AATAT,AATATATATAT,AATATATATATATATAT,AATATATATATAT,AATATATATATATATATAT,AATATATAT	AATATAT	AATATATATATAT,AATAT,AATATATATATATATAT,AATATATATATATATATAT,AATATATATAT,AATATATAT	0.389706	10	0.188679	AATATAT					AATATAT												AATATAT					AATATAT	AATATAT	AATATAT	AATATATAT				AATATAT	AATATAT	AATATAT	AATATAT	AATATAT
PF3D7_0831800	histidine-rich protein II (HRPII)	Pf3D7_08_v3	1375183	INTRON	MODIFIER				TTA	T	TTA	0.691176	3	0.0319149	T	T	T			T				T								T		T		T	T	T	T	T				T	T	T	T	T	T
PF3D7_0831800	histidine-rich protein II (HRPII)	Pf3D7_08_v3	1375248	NON_SYNONYMOUS_CODING	MODERATE	18	V	L	G	C	G	0.845588	1	0.00869565	C	C	C	C	C	C	C	C	C	C	C	C	C	C	C		C	C	C	C		C	C	C	C	C		C	C	C	C	C	C	G	C
[truncated: 39 more columns]
