# Supplementary material for: Analysis of pfhrp2 genetic diversity in Senegal and implications for use of rapid diagnostic tests
Source: Malar J. 2014 Jan 29;13:34. doi: 10.1186/1475-2875-13-34 (PMC3913323; doi:10.1186/1475-2875-13-34)
Supplement: Additional file 2 — Nucleotide diversity synonymous and non-synonymous polymorphism in Senegalese isolates. The Table contains 5,495 P. falciparum genes from the set of Senegalese isolates. Each line corresponds to a description of the gene with data on localizations in the genome, the nucleotide diversity π, synonymous and non-synonymous polymorphism (πS and πNS) and additionally the ratio (πNS/πS). [file 1475-2875-13-34-S2.xlsx]

## Sheet: Additional File 2
Pi	piNS	piS	piNS/piS	Chromosome	Start	End	Gene
0	0	0	NaN	PFC10_API_IRAB	2335	5029	ID=PFC10_API0010:rRNA;Name=PFC10_API0010%3ArRNA;description=unspecified+product;size=2695;web_id=PFC10_API0010:rRNA;locus_tag=PFC10_API0010:rRNA;size=2695;Alias=PFC10_API0010:rRNA,PFC10_API0010:rRNA,gen_apic_genom
0	0	0	NaN	PFC10_API_IRAB	29204	29430	ID=PFC10_API0057:rRNA;Name=PFC10_API0057%3ArRNA;description=unspecified+product;size=227;web_id=PFC10_API0057:rRNA;locus_tag=PFC10_API0057:rRNA;size=227;Alias=PFC10_API0057:rRNA,gen_apic_genom,PFC10_API0057:rRNA
0	0	0	NaN	Pf3D7_01_v3	69304	70417	ID=PF3D7_0101100;Name=PF3D7_0101100;description=Plasmodium+exported+protein+%28hyp5%29%2C+unknown+function;size=1114;web_id=PF3D7_0101100;locus_tag=PF3D7_0101100;size=1114;Alias=MAL1P1.2,PFA0055c,PF3D7_0101100,PFA0055c
0	0	0	NaN	Pf3D7_02_v3	876984	877832	ID=PF3D7_0222000;Name=PF3D7_0222000;description=RESA-like+protein;size=849;web_id=PF3D7_0222000;locus_tag=PF3D7_0222000;size=849;Alias=812804,3845328,4494013,9804551,12368864,46362247,86170384,PFB0980w,124505137,124801534,PF02_0208,AAC71984.1,CAB39074.1,CAG25184.1,XP_966005.1,PF3D7_0222000,XP_001349722.1,XP_001351310.1,PFB0980w
0	0	0	NaN	Pf3D7_02_v3	881469	882267	ID=PF3D7_0222200;Name=PF3D7_0222200;description=Plasmodium+exported+protein+%28hyp4%29%2C+unknown+function;size=799;web_id=PF3D7_0222200;locus_tag=PF3D7_0222200;size=799;Alias=812806,9804551,12368864,PFB0990c,PF02_0210,PF3D7_0222200,PFB0990c
0	0	0	NaN	Pf3D7_03_v3	1010342	1011140	ID=PF3D7_0324200;Name=PF3D7_0324200;description=Plasmodium+exported+protein+%28hyp4%29%2C+unknown+function;size=799;web_id=PF3D7_0324200;locus_tag=PF3D7_0324200;size=799;Alias=814557,10448855,11738814,12368867,PFC1085c,MAL3P7.48,PF3D7_0324200,PFC1085c
0	0	0	NaN	Pf3D7_06_v3	48874	49722	ID=PF3D7_0601300;Name=PF3D7_0601300;description=RESA-like+protein;size=849;web_id=PF3D7_0601300;locus_tag=PF3D7_0601300;size=849;Alias=PFF0065c,12368867,3885744,PF3D7_0601300,PFF0065c
0	0	0	NaN	Pf3D7_06_v3	1318327	1319116	ID=PF3D7_0631400;Name=PF3D7_0631400;description=Pfmc-2TM+Maurer%27s+cleft+two+transmembrane+protein+%28MC-2TM%29;size=790;web_id=PF3D7_0631400;locus_tag=PF3D7_0631400;size=790;Alias=C6KTE8,3885818,MCprot,MAL6P1.15,225631780,XP_966295.2,PFF1525c,PFF1525c,296004748,2270.t00309,PF3D7_0631400,12368867,CAG25126.2,MC-2TM
0	0	0	NaN	Pf3D7_06_v3	1321320	1322094	ID=PF3D7_0631500;Name=PF3D7_0631500;description=Plasmodium+exported+protein+%28hyp4%29%2C+unknown+function;size=775;web_id=PF3D7_0631500;locus_tag=PF3D7_0631500;size=775;Alias=86171870,2270.t00310,CAG25127.1,12368867,PFF1530c,3885819,PFF1530c,MAL6P1.14,46361265,PF3D7_0631500,XP_966296.1,C6KTE9
0	0	0	NaN	Pf3D7_06_v3	1323294	1324435	ID=PF3D7_0631600;Name=PF3D7_0631600;description=Plasmodium+exported+protein+%28hyp5%29%2C+unknown+function;size=1142;web_id=PF3D7_0631600;locus_tag=PF3D7_0631600;size=1142;Alias=MAL6P1.13,46362244,PFF1535w,2270.t00311,12368867,PF3D7_0631600,PFF1535w,CAG25181.1,CAG25128.1,XP_966002.1,86171876,XP_966297.1,46361266,86170368,3885820
0	0	0	NaN	Pf3D7_07_v3	65718	66854	ID=PF3D7_0701400;Name=PF3D7_0701400;description=Plasmodium+exported+protein+%28hyp5%29%2C+unknown+function%2C+pseudogene;size=1137;web_id=PF3D7_0701400;locus_tag=PF3D7_0701400;size=1137;Alias=2655202,C0H4J8,MAL7P1.3,MAL7P1.3,PF3D7_0701400
0	0	0	NaN	Pf3D7_07_v3	1406853	1407065	ID=PF3D7_0732600;Name=PF3D7_0732600;description=Plasmodium+exported+protein%2C+unknown+function%2C+fragment;size=213;web_id=PF3D7_0732600;locus_tag=PF3D7_0732600;size=213;Alias=MAL7P1.350,PF3D7_0732600,MAL7P1.350,9221920
0	0	0	NaN	Pf3D7_10_v3	1576441	1576991	ID=PF3D7_1039200;Name=PF3D7_1039200;description=Plasmodium+exported+protein%2C+unknown+function%2C+pseudogene;size=551;web_id=PF3D7_1039200;locus_tag=PF3D7_1039200;size=551;Alias=PF10_0382a,PF3D7_1039200
0	0	0	NaN	Pf3D7_10_v3	1594503	1595277	ID=PF3D7_1039800;Name=PF3D7_1039800;description=Plasmodium+exported+protein+%28hyp4%29%2C+unknown+function;size=775;web_id=PF3D7_1039800;locus_tag=PF3D7_1039800;size=775;Alias=CAX64019.1,23495955,XP_001349724.1,XP_001351312.1,4493996,3845330,PF10_0391,23495259,124803036,810548,XP_001347675.1,CAD48972.1,296004788,PF10_0391,124801540,225632130,PF3D7_1039800,AAN35618.1,XP_001350947.1,XP_001347705.1,…
0	0	0	NaN	Pf3D7_12_v3	2196157	2197122	ID=PF3D7_1253800;Name=PF3D7_1253800;description=Plasmodium+exported+protein+%28PHISTa%29%2C+unknown+function;size=966;web_id=PF3D7_1253800;locus_tag=PF3D7_1253800;size=966;Alias=23497050,12368864,PFL2590w,XP_001350920.1,MAL12P1.513,811568,PF3D7_1253800,PFL2590w,AAN36600.1,Q8I4P9,124807145,2277.t00516
0	0	0	NaN	Pf3D7_12_v3	2232691	2232903	ID=PF3D7_1254900;Name=PF3D7_1254900;description=Plasmodium+exported+protein%2C+unknown+function%2C+fragment;size=213;web_id=PF3D7_1254900;locus_tag=PF3D7_1254900;size=213;Alias=XP_001350932.1,PFL2650w,PFL2650w,225632084,2277.t00528,PF3D7_1254900,811580,23497062,CAX64418.1,12368864,MAL12P1.525,296005640,XP_002809134.1,124807199,AAN36612.1
0	0	0	NaN	Pf3D7_13_v3	2800004	2802154	ID=PF3D7_1371000;Name=PF3D7_1371000;description=18S+ribosomal+RNA;size=2151;web_id=PF3D7_1371000;locus_tag=PF3D7_1371000;size=2151;Alias=PF3D7_1371000,MAL13_18SrRNA.1
0	0	0	NaN	Pf3D7_13_v3	2875991	2876203	ID=PF3D7_1373200;Name=PF3D7_1373200;description=Plasmodium+exported+protein%2C+unknown+function%2C+fragment;size=213;web_id=PF3D7_1373200;locus_tag=PF3D7_1373200;size=213;Alias=MAL13P1.525,MAL13P1.525,PF3D7_1373200,9222030
4.58607e-05	0	0	NaN	Pf3D7_13_v3	1160461	1161276	ID=PF3D7_1327700;Name=PF3D7_1327700;description=regulator+of+nonsense+transcripts+3B%2C+putative+%28UPF3B%29;size=816;web_id=PF3D7_1327700;locus_tag=PF3D7_1327700;size=816;Alias=CAD52428.1,814128,qualityControl,PF13_0158,Q8IE39,PF3D7_1327700,UPF3B,XP_001350020.1,124513328,23615437,PF13_0158,P_body
5.16799e-05	0	0	NaN	Pf3D7_13_v3	1034900	1035637	ID=PF3D7_1324700;Name=PF3D7_1324700;description=SNARE+protein%2C+putative+%28YKT6.2%29;size=738;web_id=PF3D7_1324700;locus_tag=PF3D7_1324700;size=738;Alias=813686,CAX64311.1,XP_002809030.1,COPII,109692333,MAL13P1.135,COPI,rabCycle,MAL13P1.135,clathrintransport,ABG38003.1,Pviv004209AAB,PF3D7_1324700,C0H5D3,225631972,296005416,YKT6.2
5.24067e-05	0	0	NaN	Pf3D7_04_v3	742149	743091	ID=PF3D7_0417000;Name=PF3D7_0417000;description=conserved+Plasmodium+protein%2C+unknown+function;size=943;web_id=PF3D7_0417000;locus_tag=PF3D7_0417000;size=943;Alias=812522,Q8I1R8,11738814,12368867,23498235,PFD0820w,124505471,CAD49206.1,MAL4P1.159,PF3D7_0417000,XP_001351477.1,PFD0820w
5.67971e-05	0	0	NaN	Pf3D7_10_v3	160316	160962	ID=PF3D7_1003500;Name=PF3D7_1003500;description=40S+ribosomal+protein+S20e%2C+putative;size=647;web_id=PF3D7_1003500;locus_tag=PF3D7_1003500;size=647;Alias=PF10_0038,EAA19441.1,PF3D7_1003500,810196,70938247,23483940,23494901,12368864,56495850,56517103,XP_676244.1,Q8IK02,CAH99805.1,XP_727876.1,AAN35236.1,CAH76954.1,PF10_0038,82753933,68068667,124801981,XP_739823.1,XP_001347323.1,12368867,ribosomeS…
5.86721e-05	0	0	NaN	Pf3D7_07_v3	1350032	1351149	ID=PF3D7_0731300;Name=PF3D7_0731300;description=Plasmodium+exported+protein+%28PHISTb%29%2C+unknown+function+%28PfG174%29;size=1118;web_id=PF3D7_0731300;locus_tag=PF3D7_0731300;size=1118;Alias=124512146,PF3D7_0731300,Maurer,MAL7P1.174,MAL7P1.174,XP_001349206.1,23498974,2654996,MCprot,CAD51053.1,PfG174,Q8IBE9
6.60106e-05	0	0	NaN	Pf3D7_07_v3	822438	823015	ID=PF3D7_0718400;Name=PF3D7_0718400;description=mitochondrial+ribosomal+protein+S8+precursor%2C+putative;size=578;web_id=PF3D7_0718400;locus_tag=PF3D7_0718400;size=578;Alias=Q8IBR7,23498854,MAL7P1.93,XP_001349086.1,PF3D7_0718400,CAD50931.1,nuclearGenes,12368867,ribosomeStruct,MAL7P1.93,124511906,2654961,prokaryotes
6.85811e-05	0	0	NaN	Pf3D7_07_v3	939715	940250	ID=PF3D7_0721900;Name=PF3D7_0721900;description=conserved+Plasmodium+protein%2C+unknown+function;size=536;web_id=PF3D7_0721900;locus_tag=PF3D7_0721900;size=536;Alias=XP_002808787.1,C0H4P0,PF07_0090a,296004879,CAX64060.1,PF07_0090a,225632175,9221872,PF3D7_0721900
8.564e-05	0	0	NaN	Pf3D7_14_v3	1290468	1291459	ID=PF3D7_1432700;Name=PF3D7_1432700;description=protein-L-isoaspartate+O-methyltransferase+beta-aspartate+methyltransferase%2C+putative;size=992;web_id=PF3D7_1432700;locus_tag=PF3D7_1432700;size=992;Alias=PF14_0309,PF3D7_1432700,methioninemetpath,PF14_0309,12368867,811891,Q8ILD5,12368864
8.71305e-05	0	0	NaN	Pf3D7_13_v3	2797507	2798103	ID=PF3D7_1370900;Name=PF3D7_1370900;description=unspecified+product;size=597;web_id=PF3D7_1370900;locus_tag=PF3D7_1370900;size=597;Alias=PF13TR010:ncRNA,PF3D7_1370900
8.8431e-05	0	0	NaN	Pf3D7_09_v3	210077	210609	ID=PF3D7_0904500;Name=PF3D7_0904500;description=prefoldin+subunit%2C+putative;size=533;web_id=PF3D7_0904500;locus_tag=PF3D7_0904500;size=533;Alias=813324,Pf_chaperones,XP_001351919.1,Q8I3A4,23504946,124506643,CAD51730.1,PFI0220w,12368867,PFI0220w,chapfold,PF3D7_0904500
8.89909e-05	0	0	NaN	Pf3D7_13_v3	477424	477852	ID=PF3D7_1311000;Name=PF3D7_1311000;description=conserved+Plasmodium+protein%2C+unknown+function;size=429;web_id=PF3D7_1311000;locus_tag=PF3D7_1311000;size=429;Alias=MAL13P1.53,MAL13P1.53,nuclearGenes,124512964,23615255,813942,PF3D7_1311000,tRNAthiol,CAD52245.1,Q8IEK7,XP_001349838.1
9.29072e-05	0	0	NaN	Pf3D7_13_v3	1815075	1815548	ID=PF3D7_1345300;Name=PF3D7_1345300;description=conserved+Plasmodium+protein%2C+unknown+function;size=474;web_id=PF3D7_1345300;locus_tag=PF3D7_1345300;size=474;Alias=9222031,225632014,296005500,XP_002809070.1,PF3D7_1345300,CAX64351.1,PF13_0241a,PF13_0241a,C0H5H3
9.67479e-05	0	0	NaN	Pf3D7_06_v3	1258880	1259939	ID=PF3D7_0630200;Name=PF3D7_0630200;description=secreted+ookinete+protein%2C+putative+%28PSOP6%29;size=1060;web_id=PF3D7_0630200;locus_tag=PF3D7_0630200;size=1060;Alias=12368867,PSOP6,225631778,XP_966284.2,MAL6P1.126,C6KTD7,296004744,PFF1465w,3885767,PFF1465w,2270.t00190,PF3D7_0630200,CAG25114.2
0.000108677	0	0	NaN	Pf3D7_12_v3	359995	360499	ID=PF3D7_1208000;Name=PF3D7_1208000;description=apicoplast+ribosomal+protein+L29+precursor%2C+putative;size=505;web_id=PF3D7_1208000;locus_tag=PF3D7_1208000;size=505;Alias=PFL0400w,811133,23496612,nuclearGenes,AAN36169.1,PFL0400w,12368864,11738814,XP_001350489.1,ribosomeStruct,MAL12P1.80,Q8I5W7,124805615,12368867,PF3D7_1208000,apicoplastgene,2277.t00081
0.000110547	0	0	NaN	Pf3D7_10_v3	1026120	1026914	ID=PF3D7_1024500;Name=PF3D7_1024500;description=conserved+Plasmodium+protein%2C+unknown+function;size=795;web_id=PF3D7_1024500;locus_tag=PF3D7_1024500;size=795;Alias=Q8IJG0,PF10_0238,810395,124802588,23495104,XP_001347522.1,PF10_0238,AAN35435.1,12368864,PF3D7_1024500
0.000111858	0	0	NaN	Pf3D7_13_v3	1472183	1473114	ID=PF3D7_1336100;Name=PF3D7_1336100;description=conserved+Plasmodium+protein%2C+unknown+function;size=932;web_id=PF3D7_1336100;locus_tag=PF3D7_1336100;size=932;Alias=814171,296005462,CAX64334.1,225631995,C0H5F6,PF13_0202,PF3D7_1336100,XP_002809053.1,PF13_0202
0.000113283	0	0	NaN	Pf3D7_12_v3	998353	999275	ID=PF3D7_1224500;Name=PF3D7_1224500;description=chromatin+assembly+protein+%28ASF1%29%2C+putative;size=923;web_id=PF3D7_1224500;locus_tag=PF3D7_1224500;size=923;Alias=PF3D7_1224500,2277.t00236,MAL12P1.236,12368867,PFL1180w,AAN36322.1,PFL1180w,23496767,124806152,NucleoAssembly,Q8I5H2,811288,histone_chaperone,XP_001350642.1,hist_chap,12368864
0.000117274	0	0	NaN	Pf3D7_05_v3	970266	970962	ID=PF3D7_0523300;Name=PF3D7_0523300;description=conserved+Plasmodium+protein%2C+unknown+function;size=697;web_id=PF3D7_0523300;locus_tag=PF3D7_0523300;size=697;Alias=12368867,MAL5P1.233,XP_001351790.1,Q8I3N1,PFE1165c,CAD51597.1,PF3D7_0523300,23504719,124506385,813048,PFE1165c
0.000121748	0	0	NaN	Pf3D7_01_v3	218517	218824	ID=PF3D7_0104900;Name=PF3D7_0104900;description=RNase+MRP;size=308;web_id=PF3D7_0104900;locus_tag=PF3D7_0104900;size=308;Alias=RF00030,PFA0246c.1,PF3D7_0104900
0.000125801	0	0	NaN	Pf3D7_13_v3	2802945	2807159	ID=PF3D7_1371300;Name=PF3D7_1371300;description=28S+ribosomal+RNA;size=4215;web_id=PF3D7_1371300;locus_tag=PF3D7_1371300;size=4215;Alias=PF3D7_1371300,MAL13_28SrRNA.1
0.000127175	0	0	NaN	Pf3D7_13_v3	1585806	1586399	ID=PF3D7_1339400;Name=PF3D7_1339400;description=conserved+Plasmodium+protein%2C+unknown+function;size=594;web_id=PF3D7_1339400;locus_tag=PF3D7_1339400;size=594;Alias=Q8IDU1,PF13_0216,PF13_0216,CAD52528.1,XP_001350119.1,PF3D7_1339400,23615536,124513526,814183
0.000136097	0	0	NaN	Pf3D7_11_v3	1062718	1063072	ID=PF3D7_1127200;Name=PF3D7_1127200;description=conserved+Plasmodium+protein%2C+unknown+function;size=355;web_id=PF3D7_1127200;locus_tag=PF3D7_1127200;size=355;Alias=PF3D7_1127200,254832665,PF11_0283,Q8II91,PF11_0283,12368864,810830,258597326,XP_001347954.2,AAN35867.2
0.00013993	0	0	NaN	Pf3D7_11_v3	761695	762818	ID=PF3D7_1120100;Name=PF3D7_1120100;description=phosphoglycerate+mutase%2C+putative+%28PGM1%29;size=1124;web_id=PF3D7_1120100;locus_tag=PF3D7_1120100;size=1124;Alias=PF11_0208,12368864,Q8IIG6,12368867,glycolysispath,PF3D7_1120100,23496132,810755,PGM1,AAN35792.1,PF11_0208,124804024,XP_001347879.1,redoxReg,Pfal005984AAA
0.00014071	0	0	NaN	Pf3D7_10_v3	987017	987310	ID=PF3D7_1023500;Name=PF3D7_1023500;description=conserved+Plasmodium+protein%2C+unknown+function;size=294;web_id=PF3D7_1023500;locus_tag=PF3D7_1023500;size=294;Alias=254922451,AAN35425.2,PF3D7_1023500,258597095,XP_001347512.2
0.00014463	0	0	NaN	Pf3D7_14_v3	491494	492221	ID=PF3D7_1412300;Name=PF3D7_1412300;description=nuclear+transport+factor+2%2C+putative;size=728;web_id=PF3D7_1412300;locus_tag=PF3D7_1412300;size=728;Alias=PF14_0122,12368867,PF14_0122,PF3D7_1412300,AAN36734.2,Q8ILX1,258597663,811703,XP_001348295.2,12368864,255528775,bulk_mRna
0.000144721	0	0	NaN	Pf3D7_13_v3	178783	179353	ID=PF3D7_1303600;Name=PF3D7_1303600;description=conserved+Plasmodium+protein%2C+unknown+function;size=571;web_id=PF3D7_1303600;locus_tag=PF3D7_1303600;size=571;Alias=813723,PF3D7_1303600,MAL13P1.17,MAL13P1.17,Q8IES9
0.000145148	0	0	NaN	Pf3D7_14_v3	1776010	1776662	ID=PF3D7_1443300;Name=PF3D7_1443300;description=U6+snRNA-associated+Sm-like+protein+LSm5%2C+putative+%28LSM5%29;size=653;web_id=PF3D7_1443300;locus_tag=PF3D7_1443300;size=653;Alias=P_body,12368864,PF3D7_1443300,PF14_0411,12368867,PF14_0411,XP_001348585.1,AAN37024.1,splicing,811993,mRNAdeg,23497482,Q8IL38,124809480,Factors,LSM5
0.000153607	0	0	NaN	Pf3D7_06_v3	537778	538585	ID=PF3D7_0613100;Name=PF3D7_0613100;description=conserved+Plasmodium+protein%2C+unknown+function;size=808;web_id=PF3D7_0613100;locus_tag=PF3D7_0613100;size=808;Alias=C6KSX4,PF3D7_0613100,2270.t00474,MAL6P1.294,CAG25370.2,12368867,PFF0635w,3885779,PFF0635w,296004656,225631734,XP_966118.2
0.000155089	0	0	NaN	Pf3D7_12_v3	1857849	1858090	ID=PF3D7_1244300;Name=PF3D7_1244300;description=ACEA+small+nucleolar+RNA+U3;size=242;web_id=PF3D7_1244300;locus_tag=PF3D7_1244300;size=242;Alias=RF01848,PF3D7_1244300,PF3D7_12_U3snoRNA.1
0.000164988	0	0	NaN	Pf3D7_02_v3	425689	426497	ID=PF3D7_0210400;Name=PF3D7_0210400;description=50S+ribosomal+protein+L33%2C+putative;size=809;web_id=PF3D7_0210400;locus_tag=PF3D7_0210400;size=809;Alias=C6S3B5,8444973,9804551,12368864,PFB0467w,254688469,258537826,ACT79308.1,PF3D7_0210400,XP_002585392.1,PFB0467w,ribosomeStruct
0.000176345	0	0	NaN	Pf3D7_14_v3	2897916	2898657	ID=PF3D7_1470900;Name=PF3D7_1470900;description=20S+proteasome+beta+4+subunit%2C+putative;size=742;web_id=PF3D7_1470900;locus_tag=PF3D7_1470900;size=742;Alias=PF3D7_1470900,12368864,proteases,PF14_0676,258597933,PF14_0676,proteasome_new,AAN37289.2,255528933,812258,proteaUbiqpath,XP_001348850.2,Q8IKC9
0.00017688	0	0	NaN	Pf3D7_07_v3	674610	675130	ID=PF3D7_0715100;Name=PF3D7_0715100;description=conserved+Plasmodium+protein%2C+unknown+function;size=521;web_id=PF3D7_0715100;locus_tag=PF3D7_0715100;size=521;Alias=PF07_0060,XP_001349054.1,124511842,PF07_0060,Q8IBU9,PF3D7_0715100,2655104,CAD50899.1,23498822
0.000182426	0	0	NaN	Pf3D7_12_v3	588128	588982	ID=PF3D7_1213700;Name=PF3D7_1213700;description=RNA+polymerase+subunit+8c%2C+putative;size=855;web_id=PF3D7_1213700;locus_tag=PF3D7_1213700;size=855;Alias=23496666,PFL0665c,AAN36222.1,12368864,2277.t00134,124805803,12368867,Q8I5R8,RNApolyStruct,XP_001350542.1,MAL12P1.133,PF3D7_1213700,RNApolyII,811186,PFL0665c
0.000183283	0	0	NaN	Pf3D7_06_v3	506380	507198	ID=PF3D7_0611900;Name=PF3D7_0611900;description=lsm12%2C+putative;size=819;web_id=PF3D7_0611900;locus_tag=PF3D7_0611900;size=819;Alias=PFF0580w,12368867,3885927,86170899,MAL6P1.306,46361072,2270.t00013,C6KSW3,PFF0580w,CAG25359.1,PF3D7_0611900,XP_966107.1
0.000195772	0	0	NaN	Pf3D7_01_v3	450043	450646	ID=PF3D7_0111900;Name=PF3D7_0111900;description=conserved+Plasmodium+protein%2C+unknown+function;size=604;web_id=PF3D7_0111900;locus_tag=PF3D7_0111900;size=604;Alias=23477009,PFA0575c,124505867,CAD49075.1,MAL1P3.01b,PF3D7_0111900,XP_001351047.1,PFA0575c
0.000200634	0	0	NaN	Pf3D7_08_v3	1160164	1161708	ID=PF3D7_0826700;Name=PF3D7_0826700;description=receptor+for+activated+c+kinase+%28RACK%29;size=1545;web_id=PF3D7_0826700;locus_tag=PF3D7_0826700;size=1545;Alias=redoxReg,MCprot,23499027,PF3D7_0826700,PF08_0019,Q8IBA0,2655468,CAD51107.1,PF08_0019,124512250,XP_001349258.1,RACK,apoptosis
0.000211864	0	0	NaN	Pf3D7_06_v3	1218307	1219251	ID=PF3D7_0629600;Name=PF3D7_0629600;description=conserved+Plasmodium+protein%2C+unknown+function;size=945;web_id=PF3D7_0629600;locus_tag=PF3D7_0629600;size=945;Alias=PF3D7_0629600,MAL6P1.132,XP_966278.1,PFF1435w,C6KTD1,12368867,2270.t00449,86171783,PFF1435w,CAG25108.1,3885749,46361247
0.000215618	0	0	NaN	Pf3D7_14_v3	642071	642735	ID=PF3D7_1415900;Name=PF3D7_1415900;description=conserved+Plasmodium+protein%2C+unknown+function;size=665;web_id=PF3D7_1415900;locus_tag=PF3D7_1415900;size=665;Alias=PF3D7_1415900,AAN36769.1,23497222,PF14_0157,12368864,XP_001348330.1,Q8ILT7,PF14_0157,124808502,811738
0.00021614	0	0	NaN	Pf3D7_11_v3	687235	687781	ID=PF3D7_1118100;Name=PF3D7_1118100;description=clathrin+assembly+protein+AP19%2C+putative;size=547;web_id=PF3D7_1118100;locus_tag=PF3D7_1118100;size=547;Alias=Q8III7,clathrintransport,810734,PF11_0187,PF3D7_1118100,XP_001347858.1,124803952,12368867,23496110,12368864,AAN35771.1,PF11_0187
0.000229168	0	0	NaN	Pf3D7_13_v3	1897983	1899362	ID=PF3D7_1347500;Name=PF3D7_1347500;description=DNA%2FRNA-binding+protein+Alba+4;size=1380;web_id=PF3D7_1347500;locus_tag=PF3D7_1347500;size=1380;Alias=MAL13P1.237,124513666,CAD52598.1,Q8IDM3,23615606,PF3D7_1347500,813796,MAL13P1.237,XP_001350189.1
0.000234486	0	0	NaN	Pf3D7_06_v3	778692	779636	ID=PF3D7_0618700;Name=PF3D7_0618700;description=transport+protein+particle+%28TRAPP%29+component%2C+putative;size=945;web_id=PF3D7_0618700;locus_tag=PF3D7_0618700;size=945;Alias=46361138,2270.t00074,XP_966172.1,C6KT27,PFF0905w,CAG25002.1,PF3D7_0618700,12368867,MAL6P1.240,3885846,86171238,PFF0905w,largeTethering
0.00024179	0	0	NaN	Pf3D7_14_v3	2475501	2476473	ID=PF3D7_1460700;Name=PF3D7_1460700;description=60S+ribosomal+protein+L27%2C+putative;size=973;web_id=PF3D7_1460700;locus_tag=PF3D7_1460700;size=973;Alias=AAN37192.2,258597884,12368867,255528903,ribosomeStruct,PF3D7_1460700,12368864,812161,PF14_0579,XP_001348753.2,Q8IKM5,PF14_0579
0.000245961	0	0	NaN	Pf3D7_02_v3	557048	557696	ID=PF3D7_0213700;Name=PF3D7_0213700;description=conserved+protein%2C+unknown+function;size=649;web_id=PF3D7_0213700;locus_tag=PF3D7_0213700;size=649;Alias=812724,O96217,3845232,9804551,12368864,PFB0620w,124801243,PF02_0128,AAC71913.1,PF3D7_0213700,XP_001349642.1,PFB0620w
0.00024613	0	0	NaN	Pf3D7_03_v3	807277	807859	ID=PF3D7_0319300;Name=PF3D7_0319300;description=ubiquitin+conjugating+enzyme%2C+putative;size=583;web_id=PF3D7_0319300;locus_tag=PF3D7_0319300;size=583;Alias=814507,O77397,7768300,10448855,12368867,PFC0855w,124505043,MAL3P6.32,CAB11153.2,PF3D7_0319300,XP_001351263.1,PFC0855w,proteaUbiqpath,proteasome_new
0.000270443	0	0	NaN	Pf3D7_03_v3	311223	311382	ID=PF3D7_0307000;Name=PF3D7_0307000;description=small+nucleolar+RNA+snoR03;size=160;web_id=PF3D7_0307000;locus_tag=PF3D7_0307000;size=160;Alias=RF01584,RNAzID:2814,PF3D7_0307000,PFC0291w:snoRNA
0.000274435	0	0	NaN	Pf3D7_03_v3	1012355	1013464	ID=PF3D7_0324300;Name=PF3D7_0324300;description=Plasmodium+exported+protein+%28hyp5%29%2C+unknown+function;size=1110;web_id=PF3D7_0324300;locus_tag=PF3D7_0324300;size=1110;Alias=814558,4493997,10448855,11738814,12368867,23510589,PFC1090w,124505143,124505665,MAL3P7.49,CAB39056.1,CAD48971.1,PF3D7_0324300,XP_001350946.1,XP_001351313.1,PFC1090w
0.00028974	0	0	NaN	Pf3D7_08_v3	236442	236571	ID=PF3D7_0803900;Name=PF3D7_0803900;description=unspecified+product;size=130;web_id=PF3D7_0803900;locus_tag=PF3D7_0803900;size=130;Alias=PF3D7_0803900,PF3D7_08ncRNA1.1
0.000294264	0	0	NaN	Pf3D7_13_v3	2790868	2791890	ID=PF3D7_1370400;Name=PF3D7_1370400;description=unspecified+product;size=1023;web_id=PF3D7_1370400;locus_tag=PF3D7_1370400;size=1023;Alias=PF3D7_1370400,PF13TR007:ncRNA
0.00030182	0	0	NaN	Pf3D7_10_v3	814352	814957	ID=PF3D7_1020100;Name=PF3D7_1020100;description=flagellar+outer+arm+dynein-associated+protein%2C+putative;size=606;web_id=PF3D7_1020100;locus_tag=PF3D7_1020100;size=606;Alias=XP_002585409.1,PF3D7_1020100,Kinetochore,ACT83897.1,254922435,molecularMotor,organizKinetochore,258549071,PF10_0195a,8445014,C6S3D2,12368864,PF10_0195a
0.000304144	0	0	NaN	Pf3D7_01_v3	429041	429749	ID=PF3D7_0111100;Name=PF3D7_0111100;description=unspecified+product;size=709;web_id=PF3D7_0111100;locus_tag=PF3D7_0111100;size=709;Alias=PF3D7_0111100,PF01TR006:ncRNA
0.000314999	0	0	NaN	Pf3D7_08_v3	233467	234426	ID=PF3D7_0803800;Name=PF3D7_0803800;description=20S+proteasome+beta+subunit;size=960;web_id=PF3D7_0803800;locus_tag=PF3D7_0803800;size=960;Alias=MAL8P1.142,2655367,23499245,proteaUbiqpath,AAF21797.1,MAL8P1.142,6650323,proteasome_new,proteases,XP_001349476.1,CAD51325.1,Q7K6A9,PF3D7_0803800,124512686
0.000317073	0	0	NaN	Pf3D7_07_v3	1333175	1334938	ID=PF3D7_0731000;Name=PF3D7_0731000;description=unspecified+product;size=1764;web_id=PF3D7_0731000;locus_tag=PF3D7_0731000;size=1764;Alias=PF3D7_0731000,PF07TR004:ncRNA
0.000317208	0	0	NaN	Pf3D7_08_v3	1271278	1272090	ID=PF3D7_0829700;Name=PF3D7_0829700;description=unspecified+product;size=813;web_id=PF3D7_0829700;locus_tag=PF3D7_0829700;size=813;Alias=PF08TR003:ncRNA,PF3D7_0829700
0.000322781	0	0	NaN	Pf3D7_14_v3	779377	779495	ID=PF3D7_1418500;Name=PF3D7_1418500;description=5S+ribosomal+RNA;size=119;web_id=PF3D7_1418500;locus_tag=PF3D7_1418500;size=119;Alias=MAL14_5S_1:rRNA,MAL14_5S_1:rRNA,PF3D7_1418500
0.000323298	0	0	NaN	Pf3D7_13_v3	965486	966280	ID=PF3D7_1323100;Name=PF3D7_1323100;description=60S+ribosomal+protein+L6%2C+putative;size=795;web_id=PF3D7_1323100;locus_tag=PF3D7_1323100;size=795;Alias=124513230,814100,12368867,PF13_0129,PF13_0129,ribosomeStruct,XP_001349971.1,Q8IE85,CAD52379.1,PF3D7_1323100,23615388
0.00033191	0	0	NaN	Pf3D7_07_v3	285472	286166	ID=PF3D7_0705700;Name=PF3D7_0705700;description=40S+ribosomal+protein+S29%2C+putative;size=695;web_id=PF3D7_0705700;locus_tag=PF3D7_0705700;size=695;Alias=MAL7P1.300,CAX64028.1,ribosomeStruct,225632139,MAL7P1.300,296004806,9221877,PF3D7_0705700,C0H4K8,XP_002808755.1
0.000332827	0	0	NaN	Pf3D7_07_v3	962031	962447	ID=PF3D7_0722700;Name=PF3D7_0722700;description=conserved+Plasmodium+protein%2C+unknown+function;size=417;web_id=PF3D7_0722700;locus_tag=PF3D7_0722700;size=417;Alias=PF3D7_0722700,PF07_0093,124511990,23498896,2655137,PF07_0093,XP_001349128.1,CAD50974.1,Q8IBM6
0.000333431	0	0	NaN	Pf3D7_13_v3	1809736	1810521	ID=PF3D7_1345100;Name=PF3D7_1345100;description=thioredoxin+2+%28TRX2%29;size=786;web_id=PF3D7_1345100;locus_tag=PF3D7_1345100;size=786;Alias=MAL13P1.225,PF3D7_1345100,124513620,AF484689,XP_001350166.1,redoxmetpath,TRX2,AAQ05974.1,nuclearGenes,PTEX,antioxidantSystem,33320672,23615583,813783,CAD52575.1,thioredoxinpath,MAL13P1.225,Q8IDP4
0.000335031	0	0	NaN	PFC10_API_IRAB	6561	6716	ID=PFC10_API0013;Name=PFC10_API0013;description=hypothetical+protein+%28ORF51%29;size=156;web_id=PFC10_API0013;locus_tag=PFC10_API0013;size=156;Alias=ORF51,CAA64570.1,gen_apic_genom,1171585,PFC10_API0013,PFC10_API0013
0.000346582	0	0	NaN	Pf3D7_10_v3	429204	430140	ID=PF3D7_1011000;Name=PF3D7_1011000;description=conserved+protein%2C+unknown+function;size=937;web_id=PF3D7_1011000;locus_tag=PF3D7_1011000;size=937;Alias=PF3D7_1011000,AAN35305.2,258597015,PF10_0107,XP_001347392.2,12368864,254922403,810265,Q8IJT5,PF10_0107
0.000347448	0	0	NaN	Pf3D7_11_v3	765033	765625	ID=PF3D7_1120200;Name=PF3D7_1120200;description=conserved+Plasmodium+protein%2C+unknown+function;size=593;web_id=PF3D7_1120200;locus_tag=PF3D7_1120200;size=593;Alias=258597280,PF3D7_1120200,12368864,PF11_0209,PF11_0209,AAN35793.2,810756,XP_001347880.2,254832641,Q8IIG5
0.000349228	0	0	NaN	Pf3D7_09_v3	1187663	1188850	ID=PF3D7_0929900;Name=PF3D7_0929900;description=conserved+Plasmodium+protein%2C+unknown+function;size=1188;web_id=PF3D7_0929900;locus_tag=PF3D7_0929900;size=1188;Alias=C0H574,CAX64251.1,PFI1463w,296005277,12368867,XP_002808970.1,PFI1463w,9221970,PF3D7_0929900,225631856
0.000349449	0	0	NaN	Pf3D7_09_v3	509934	510527	ID=PF3D7_0911200;Name=PF3D7_0911200;description=conserved+Plasmodium+protein%2C+unknown+function;size=594;web_id=PF3D7_0911200;locus_tag=PF3D7_0911200;size=594;Alias=PFI0545w,Q8I340,CAD51795.1,XP_001351984.1,12368867,813389,PFI0545w,124506773,PF3D7_0911200,23505012
0.000352188	0	0	NaN	Pf3D7_13_v3	372260	372646	ID=PF3D7_1308300;Name=PF3D7_1308300;description=40S+ribosomal+protein+S27%2C+putative;size=387;web_id=PF3D7_1308300;locus_tag=PF3D7_1308300;size=387;Alias=124512908,12368867,23615227,CAD52217.1,Q8IEN2,PF3D7_1308300,ribosomeStruct,814024,PF13_0045,XP_001349810.1,PF13_0045
0.000355967	0	0	NaN	Pf3D7_11_v3	381154	381259	ID=PF3D7_1109000;Name=PF3D7_1109000;description=small+nucleolar+RNA+snoR07;size=106;web_id=PF3D7_1109000;locus_tag=PF3D7_1109000;size=106;Alias=RF01585,PF11_0102.1,PF3D7_1109000
0.000359762	0	0	NaN	Pf3D7_07_v3	662284	663407	ID=PF3D7_0714400;Name=PF3D7_0714400;description=calmodulin%2C+putative;size=1124;web_id=PF3D7_0714400;locus_tag=PF3D7_0714400;size=1124;Alias=MAL7P1.69,nuclearGenes,PF3D7_0714400,calmodulin,Q8IBV3,2655017,MAL7P1.69,12368867
0.000361387	0	0	NaN	Pf3D7_03_v3	968675	969202	ID=PF3D7_0323000;Name=PF3D7_0323000;description=conserved+Plasmodium+protein%2C+unknown+function;size=528;web_id=PF3D7_0323000;locus_tag=PF3D7_0323000;size=528;Alias=814545,O97314,4494004,10448855,12368867,PFC1025w,124505119,MAL3P7.36,CAB39063.1,PF3D7_0323000,XP_001351301.1,PFC1025w
0.000370615	0	0	NaN	M76611	625	724	ID=malmito_rna_10:rRNA;Name=malmito_rna_10%3ArRNA;description=unspecified+product;size=100;web_id=malmito_rna_10:rRNA;locus_tag=malmito_rna_10:rRNA;size=100;Alias=RNA10,malmito_rna_10:rRNA,malmito_rna_10:rRNA
0.000385299	0	0	NaN	Pf3D7_08_v3	1093690	1094489	ID=PF3D7_0825200;Name=PF3D7_0825200;description=translation+initiation+factor+IF-3%2C+putative;size=800;web_id=PF3D7_0825200;locus_tag=PF3D7_0825200;size=800;Alias=XP_001349272.1,PF3D7_0825200,apicoplastgene,Q8IB86,2655233,MAL8P1.27,23499041,124512278,prokaryotes,MAL8P1.27,CAD51121.1
0.000385648	0	0	NaN	Pf3D7_08_v3	1284578	1287755	ID=PF3D7_0830200;Name=PF3D7_0830200;description=unspecified+product;size=3178;web_id=PF3D7_0830200;locus_tag=PF3D7_0830200;size=3178;Alias=PF3D7_0830200,PF08_tmp1:rRNA,PF08_tmp1:rRNA
0.000388203	0	0	NaN	Pf3D7_07_v3	807778	809130	ID=PF3D7_0718200;Name=PF3D7_0718200;description=unspecified+product;size=1353;web_id=PF3D7_0718200;locus_tag=PF3D7_0718200;size=1353;Alias=PF07TR003:ncRNA,PF3D7_0718200
0.000388654	0	0	NaN	Pf3D7_11_v3	144841	144939	ID=PF3D7_1103300;Name=PF3D7_1103300;description=unspecified+product;size=99;web_id=PF3D7_1103300;locus_tag=PF3D7_1103300;size=99;Alias=1399.pre-tRNA-Leu-1,PF3D7_1103300,MAL11_tRNA_Leu1:tRNA
0.000396583	0	0	NaN	Pf3D7_14_v3	423751	424250	ID=PF3D7_1410500;Name=PF3D7_1410500;description=conserved+Plasmodium+protein%2C+unknown+function;size=500;web_id=PF3D7_1410500;locus_tag=PF3D7_1410500;size=500;Alias=124808280,XP_001348276.1,Q8ILZ0,PF14_0103,PF14_0103,23497167,AAN36715.1,PF3D7_1410500,12368864,811684
0.000403083	0	0	NaN	Pf3D7_07_v3	1304347	1305096	ID=PF3D7_0730400;Name=PF3D7_0730400;description=conserved+Plasmodium+protein%2C+unknown+function;size=750;web_id=PF3D7_0730400;locus_tag=PF3D7_0730400;size=750;Alias=XP_001349200.1,PF3D7_0730400,PF07_0127,23498968,Q8IBF5,PF07_0127,CAD51047.1,2655180,124512134
0.000403474	0	0	NaN	Pf3D7_10_v3	1444441	1445529	ID=PF3D7_1036600.1;Name=PF3D7_1036600.1;description=conserved+Plasmodium+protein%2C+unknown+function;size=1089;web_id=PF3D7_1036600.1;locus_tag=PF3D7_1036600.1;size=1089;Alias=258597155,12368864,254922490,XP_001347642.2,AAN35555.2,PF10_0358,PF3D7_1036600.1,Q8IJ42,PF10_0358,810515
0.000403474	0	0	NaN	Pf3D7_10_v3	1444441	1445529	ID=PF3D7_1036600.2;Name=PF3D7_1036600.2;description=conserved+Plasmodium+protein%2C+unknown+function;size=1089;web_id=PF3D7_1036600.2;locus_tag=PF3D7_1036600.2;size=1089;Alias=PF3D7_1036600.2
0.000406177	0	0	NaN	Pf3D7_10_v3	1150663	1151853	ID=PF3D7_1027700.1;Name=PF3D7_1027700.1;description=centrin-3+%28CEN3%29;size=1191;web_id=PF3D7_1027700.1;locus_tag=PF3D7_1027700.1;size=1191;Alias=CEN3,258597121,PF10_0271,12368867,XP_001347555.2,PF3D7_1027700.1,mitoticCentro,Centriole,PF10_0271,810428,Q8IJC7,AAN35468.2,254922469,12368864
0.000406177	0	0	NaN	Pf3D7_10_v3	1150663	1151853	ID=PF3D7_1027700.2;Name=PF3D7_1027700.2;description=centrin-3;size=1191;web_id=PF3D7_1027700.2;locus_tag=PF3D7_1027700.2;size=1191;Alias=PF3D7_1027700.2
0.000410731	0	0	NaN	PFC10_API_IRAB	27777	27868	ID=PFC10_API0048:tRNA;Name=PFC10_API0048%3AtRNA;description=unspecified+product;size=92;web_id=PFC10_API0048:tRNA;locus_tag=PFC10_API0048:tRNA;size=92;Alias=PFC10_API0048:tRNA,gen_apic_genom,PFC10_API0048:tRNA
0.000417272	0	0	NaN	Pf3D7_07_v3	689543	690057	ID=PF3D7_0715500;Name=PF3D7_0715500;description=mitochondrial+ATP+synthase+F1%2C+epsilon+subunit%2C+putative;size=515;web_id=PF3D7_0715500;locus_tag=PF3D7_0715500;size=515;Alias=CAD50903.1,XP_001349058.1,12368867,MAL7P1.75,nuclearGenes,124511850,Q8IBU5,2655040,23498826,mitochonApico,PF3D7_0715500,MAL7P1.75
0.000420117	0	0	NaN	Pf3D7_11_v3	1925942	1933150	ID=PF3D7_1148600;Name=PF3D7_1148600;description=unspecified+product;size=7209;web_id=PF3D7_1148600;locus_tag=PF3D7_1148600;size=7209;Alias=MAL11_rRNA:rRNA,PF3D7_1148600,MAL11_rRNA:rRNA
0.000421907	0	0	NaN	Pf3D7_07_v3	1144046	1144730	ID=PF3D7_0726800;Name=PF3D7_0726800;description=conserved+Plasmodium+protein%2C+unknown+function;size=685;web_id=PF3D7_0726800;locus_tag=PF3D7_0726800;size=685;Alias=225632181,296004891,PF07_0109a,PF07_0109a,CAX64065.1,PF3D7_0726800,C0H4P5,XP_002808792.1,9221909
0.000432914	0	0	NaN	Pf3D7_06_v3	349946	350515	ID=PF3D7_0608400;Name=PF3D7_0608400;description=conserved+Plasmodium+protein%2C+unknown+function;size=570;web_id=PF3D7_0608400;locus_tag=PF3D7_0608400;size=570;Alias=C6KST2,PF3D7_0608400,296004638,MAL6P1.87,CAG25326.2,3885907,12368867,PFF0415c,XP_966074.2,225631725,PFF0415c,2270.t00229
0.000436333	0	0	NaN	Pf3D7_03_v3	567247	568850	ID=PF3D7_0314000;Name=PF3D7_0314000;description=co-chaperone+p23+%28P23%29;size=1604;web_id=PF3D7_0314000;locus_tag=PF3D7_0314000;size=1604;Alias=P23,814454,C0H473,10448855,12368867,PFC0581w,chapfold,225685555,296004356,CAX64432.1,PF3D7_0314000,Pf_chaperones,XP_002808623.1,PFC0581w
0.000438538	0	0	NaN	Pf3D7_13_v3	1677540	1677917	ID=PF3D7_1342700;Name=PF3D7_1342700;description=transcription+activator%2C+putative;size=378;web_id=PF3D7_1342700;locus_tag=PF3D7_1342700;size=378;Alias=MAL13P1.213,PF3D7_1342700,124513584,12368867,Q8IDR2,CAD52557.1,23615565,MAL13P1.213,RNApolyStruct,XP_001350148.1,813770
0.000440794	0	0	NaN	Pf3D7_12_v3	1251914	1253067	ID=PF3D7_1230400;Name=PF3D7_1230400;description=ATP-dependent+protease+subunit+ClpQ+%28ClpQ%29;size=1154;web_id=PF3D7_1230400;locus_tag=PF3D7_1230400;size=1154;Alias=XP_001350699.2,ClpQ,Pf_chaperones,AAN36379.2,MAL12P1.293,811345,Q8I5B6,proteases,PFL1465c,PF3D7_1230400,PFL1465c,254945393,2277.t00293,258597527
0.000443111	0	0	NaN	Pf3D7_02_v3	137557	138389	ID=PF3D7_0202800;Name=PF3D7_0202800;description=conserved+Plasmodium+protein%2C+unknown+function;size=833;web_id=PF3D7_0202800;locus_tag=PF3D7_0202800;size=833;Alias=C6S3A7,8444950,9804551,12368864,PFB0135w,254688444,258537810,ACT79300.1,PF3D7_0202800,XP_002585384.1,PFB0135w
0.000450202	0	0	NaN	Pf3D7_14_v3	2646603	2647033	ID=PF3D7_1465400;Name=PF3D7_1465400;description=conserved+Plasmodium+protein%2C+unknown+function;size=431;web_id=PF3D7_1465400;locus_tag=PF3D7_1465400;size=431;Alias=12368864,PF14_0621,XP_001348795.2,812203,AAN37234.2,PF3D7_1465400,Q8IKI4,255528914,PF14_0621,258597899
0.000455788	0	0	NaN	Pf3D7_08_v3	98890	99051	ID=PF3D7_0801200;Name=PF3D7_0801200;description=unspecified+product;size=162;web_id=PF3D7_0801200;locus_tag=PF3D7_0801200;size=162;Alias=PF3D7_0801200,PF08_tmp2:ncRNA
0.000456323	0	0	NaN	Pf3D7_13_v3	2130531	2131065	ID=PF3D7_1353200;Name=PF3D7_1353200;description=membrane+associated+histidine-rich+protein+%28MAHRP2%29;size=535;web_id=PF3D7_1353200;locus_tag=PF3D7_1353200;size=535;Alias=Q8IDG8,124513776,MCprot,PF13_0276,CAD52653.1,XP_001350244.1,PF3D7_1353200,AJ290923,MAHRP2,PF13_0276,814241,23615661
0.000456942	0	0	NaN	Pf3D7_01_v3	473739	475887	ID=PF3D7_0112300;Name=PF3D7_0112300;description=18S+ribosomal+RNA;size=2149;web_id=PF3D7_0112300;locus_tag=PF3D7_0112300;size=2149;Alias=MAL1_18s:rRNA,PF3D7_0112300,MAL1_18s:rRNA
0.000466708	0	0	NaN	Pf3D7_14_v3	3003984	3004475	ID=PF3D7_1473800;Name=PF3D7_1473800;description=unspecified+product;size=492;web_id=PF3D7_1473800;locus_tag=PF3D7_1473800;size=492;Alias=PF14TR007:ncRNA,PF3D7_1473800
0.000474683	0	0	NaN	Pf3D7_14_v3	575496	577055	ID=PF3D7_1414400;Name=PF3D7_1414400;description=serine%2Fthreonine+protein+phosphatase+%28PP1%29;size=1560;web_id=PF3D7_1414400;locus_tag=PF3D7_1414400;size=1560;Alias=Phos_tmd_exprs,21449310,221060406,CAQ42820.1,protProphase,EDL47082.1,Q8ILV1,PF14_0142,XP_001616809.1,Maurer,XP_001348315.1,148805683,MCprot,AAN36754.1,AAM54063.1,organizKinetochore,193810922,811723,XP_002260848.1,PF14_0142,phosphor…
0.000477107	0	0	NaN	Pf3D7_05_v3	978665	979870	ID=PF3D7_0523600;Name=PF3D7_0523600;description=conserved+Plasmodium+protein%2C+unknown+function;size=1206;web_id=PF3D7_0523600;locus_tag=PF3D7_0523600;size=1206;Alias=PFE1175w,124506389,12368867,Q8I3M9,MAL5P1.235,PFE1175w,XP_001351792.1,PF3D7_0523600,813050,CAD51599.1,23504721
0.000493229	0	0	NaN	Pf3D7_10_v3	1511342	1511835	ID=PF3D7_1038200;Name=PF3D7_1038200;description=conserved+Plasmodium+protein%2C+unknown+function;size=494;web_id=PF3D7_1038200;locus_tag=PF3D7_1038200;size=494;Alias=ACT83909.1,254922497,PF10_0373a,C6S3E4,8445029,12368864,PF10_0373a,XP_002585421.1,PF3D7_1038200,258549097
0.000496345	0	0	NaN	Pf3D7_02_v3	443824	444608	ID=PF3D7_0211000;Name=PF3D7_0211000;description=unspecified+product;size=785;web_id=PF3D7_0211000;locus_tag=PF3D7_0211000;size=785;Alias=PF3D7_0211000,PF02TR002:ncRNA
0.000501157	0	0	NaN	Pf3D7_05_v3	976690	977815	ID=PF3D7_0523500;Name=PF3D7_0523500;description=outer+arm+dynein+lc3%2C+putative;size=1126;web_id=PF3D7_0523500;locus_tag=PF3D7_0523500;size=1126;Alias=9221857,PF3D7_0523500,C0H4G0,12368867,PFE1173c,PFE1173c,molecularMotor
0.000509222	0	0	NaN	Pf3D7_05_v3	544540	545993	ID=PF3D7_0512600;Name=PF3D7_0512600;description=Rab+GTPase+1b+%28Rab1b%29;size=1454;web_id=PF3D7_0512600;locus_tag=PF3D7_0512600;size=1454;Alias=PF3D7_0512600,13375179,PFE0625w,chaperone,XP_001351683.1,Q9BHN1,23504611,Pfal00023AAA,PFE0625w,rabCycle,Rab1b,812940,CAC34553.1,er_golgi_tr_qa,124506171,MAL5P1.126,CAD51490.1,rabIntracellular,proteins,Q7K6A8
0.00051307	0	0	NaN	Pf3D7_02_v3	270078	270619	ID=PF3D7_0206600;Name=PF3D7_0206600;description=transcription+factor%2C+putative;size=542;web_id=PF3D7_0206600;locus_tag=PF3D7_0206600;size=542;Alias=812658,O96159,3845145,9804551,12368864,12368867,PFB0290c,124800991,PF02_0062,RNApolyII,AAC71847.1,PF3D7_0206600,RNApolyStruct,XP_001349576.1,PFB0290c
0.000525697	0	0	NaN	Pf3D7_01_v3	361987	362586	ID=PF3D7_0108900;Name=PF3D7_0108900;description=unspecified+product;size=600;web_id=PF3D7_0108900;locus_tag=PF3D7_0108900;size=600;Alias=PF3D7_0108900,PF01TR005:ncRNA
0.00052643	0	0	NaN	Pf3D7_07_v3	1319011	1319082	ID=PF3D7_0730700;Name=PF3D7_0730700;description=unspecified+product;size=72;web_id=PF3D7_0730700;locus_tag=PF3D7_0730700;size=72;Alias=PF3D7_0730700,MAL7_tRNA_Thr2:tRNA,MAL7_tRNA_Thr2:tRNA
0.00054017	0	0	NaN	Pf3D7_08_v3	1096423	1097363	ID=PF3D7_0825400;Name=PF3D7_0825400;description=conserved+Plasmodium+protein%2C+unknown+function;size=941;web_id=PF3D7_0825400;locus_tag=PF3D7_0825400;size=941;Alias=9221948,296005084,225632276,C0H4X8,MAL8P1.25a,PF3D7_0825400,XP_002808878.1,MAL8P1.25a,CAX64156.1
0.000543786	0	0	NaN	Pf3D7_07_v3	861583	862487	ID=PF3D7_0719700;Name=PF3D7_0719700;description=40S+ribosomal+protein+S10%2C+putative;size=905;web_id=PF3D7_0719700;locus_tag=PF3D7_0719700;size=905;Alias=23498866,CAD50944.1,XP_001349098.1,Q8IBQ5,PF07_0080,PF07_0080,2655124,ribosomeStruct,124511930,12368867,PF3D7_0719700
0.000547625	0	0	NaN	M76611	5379	5446	ID=mal_rna_15:rRNA;Name=mal_rna_15%3ArRNA;description=unspecified+product;size=68;web_id=mal_rna_15:rRNA;locus_tag=mal_rna_15:rRNA;size=68;Alias=mal_rna_15:rRNA,mal_rna_15:rRNA
0.000548295	0	0	NaN	Pf3D7_13_v3	2796119	2797144	ID=PF3D7_1370800;Name=PF3D7_1370800;description=unspecified+product;size=1026;web_id=PF3D7_1370800;locus_tag=PF3D7_1370800;size=1026;Alias=PF3D7_1370800,PF13TR009:ncRNA
0.000551322	0	0	NaN	Pf3D7_13_v3	1085786	1086861	ID=PF3D7_1326000;Name=PF3D7_1326000;description=conserved+Plasmodium+protein%2C+unknown+function;size=1076;web_id=PF3D7_1326000;locus_tag=PF3D7_1326000;size=1076;Alias=MAL13P1.141,813692,PF3D7_1326000,MAL13P1.141,XP_001349998.1,CAD52406.1,23615415,Q8IE60,124513284
0.000568826	0	0	NaN	Pf3D7_12_v3	1249768	1250657	ID=PF3D7_1230300;Name=PF3D7_1230300;description=subpellicular+microtubule+protein+2%2C+putative+%28SPM2%29;size=890;web_id=PF3D7_1230300;locus_tag=PF3D7_1230300;size=890;Alias=2277.t00292,AAN36378.1,SPM2,12368864,23496824,PF3D7_1230300,PFL1460c,MAL12P1.292,811344,XP_001350698.1,Q8I5B7,124806350,PFL1460c
0.000571904	0	0	NaN	Pf3D7_09_v3	643232	644043	ID=PF3D7_0915100;Name=PF3D7_0915100;description=ubiquitin+conjugating+enzyme%2C+putative;size=812;web_id=PF3D7_0915100;locus_tag=PF3D7_0915100;size=812;Alias=124506851,23505051,proteasome_new,proteaUbiqpath,PF3D7_0915100,PFI0740c,XP_001352023.1,Q8I301,CAD51834.1,SUMOylation,813428,12368867,PFI0740c
0.000573024	0	0	NaN	Pf3D7_11_v3	1916392	1918050	ID=PF3D7_1148100;Name=PF3D7_1148100;description=unspecified+product;size=1659;web_id=PF3D7_1148100;locus_tag=PF3D7_1148100;size=1659;Alias=PF11TR011:ncRNA,PF3D7_1148100
0.000582272	0	0	NaN	Pf3D7_03_v3	132361	133395	ID=PF3D7_0302400;Name=PF3D7_0302400;description=unspecified+product;size=1035;web_id=PF3D7_0302400;locus_tag=PF3D7_0302400;size=1035;Alias=PF3D7_0302400,PF03TR002:ncRNA
0.000584083	0	0	NaN	Pf3D7_06_v3	442806	443219	ID=PF3D7_0610300;Name=PF3D7_0610300;description=unspecified+product;size=414;web_id=PF3D7_0610300;locus_tag=PF3D7_0610300;size=414;Alias=PF3D7_0610300,PF06TR003:ncRNA
0.000585063	0	0	NaN	Pf3D7_12_v3	968980	970073	ID=PF3D7_1223700;Name=PF3D7_1223700;description=integral+membrane+protein%2C+putative;size=1094;web_id=PF3D7_1223700;locus_tag=PF3D7_1223700;size=1094;Alias=transporters,2277.t00228,811280,PF3D7_1223700,124806124,23496759,AAN36314.1,PFL1140w,ERGolgiVacuole,12368864,PFL1140w,Q8I5I0,XP_001350634.1,MAL12P1.228
0.000586275	0	0	NaN	Pf3D7_11_v3	1657507	1657978	ID=PF3D7_1141200;Name=PF3D7_1141200;description=conserved+Plasmodium+protein%2C+unknown+function;size=472;web_id=PF3D7_1141200;locus_tag=PF3D7_1141200;size=472;Alias=PF11_0423,Q8IHV3,810969,12368864,PF11_0423,PF3D7_1141200
0.000589688	0	0	NaN	Pf3D7_01_v3	286951	288918	ID=PF3D7_0106800;Name=PF3D7_0106800;description=Rab+GTPase+5c+%28RAB5c%29;size=1968;web_id=PF3D7_0106800;locus_tag=PF3D7_0106800;size=1968;Alias=RAB5c,17066210,PFA0335w,proteins,rabCycle,MAL1P1.59,endos_mat,CAD12439.1,PF3D7_0106800,PFA0335w,rabIntracellular
0.000592107	0	0	NaN	Pf3D7_04_v3	688192	689053	ID=PF3D7_0415500;Name=PF3D7_0415500;description=nuclear+cap-binding+protein%2C+putative;size=862;web_id=PF3D7_0415500;locus_tag=PF3D7_0415500;size=862;Alias=812555,Q8I1T2,12368867,23498221,PFD0750w,exportin,124505443,CAD49192.1,MAL4P1.145,PF3D7_0415500,XP_001351463.1,PFD0750w,qualityControl
0.000594827	0	0	NaN	Pf3D7_01_v3	376294	377004	ID=PF3D7_0109500;Name=PF3D7_0109500;description=N-acetyltransferase%2C+putative;size=711;web_id=PF3D7_0109500;locus_tag=PF3D7_0109500;size=711;Alias=Histone,23510668,PFA0465c,124505823,MAL1P2.22,CAD49053.1,PF3D7_0109500,Pfal007523AAA,XP_001351025.1,PFA0465c,chrom_mod_prot,pyruvatemetpath,termilalCleavage
0.000595474	0	0	NaN	Pf3D7_11_v3	668368	669491	ID=PF3D7_1117600.1;Name=PF3D7_1117600.1;description=conserved+Plasmodium+protein%2C+unknown+function;size=1124;web_id=PF3D7_1117600.1;locus_tag=PF3D7_1117600.1;size=1124;Alias=258597271,Q8IIJ1,AAN35766.2,PF11_0182,12368864,XP_001347853.2,254832637,810729,PF11_0182,PF3D7_1117600.1
0.000595474	0	0	NaN	Pf3D7_11_v3	668368	669491	ID=PF3D7_1117600.2;Name=PF3D7_1117600.2;description=conserved+Plasmodium+protein%2C+unknown+function;size=1124;web_id=PF3D7_1117600.2;locus_tag=PF3D7_1117600.2;size=1124;Alias=PF3D7_1117600.2
0.000597476	0	0	NaN	Pf3D7_08_v3	1256555	1257133	ID=PF3D7_0829300;Name=PF3D7_0829300;description=U6+snRNA-associated+Sm-like+protein+LSm8%2C+putative+%28LSM8%29;size=579;web_id=PF3D7_0829300;locus_tag=PF3D7_0829300;size=579;Alias=MAL8P1.9,Factors,CAX64164.1,MAL8P1.9,LSM8,PF3D7_0829300,225632285,12368867,2655440,XP_002808886.1,splicing,C0H4Y9,296005102
0.00059941	0	0	NaN	Pf3D7_14_v3	1678662	1679486	ID=PF3D7_1441200;Name=PF3D7_1441200;description=60S+ribosomal+protein+L1%2C+putative;size=825;web_id=PF3D7_1441200;locus_tag=PF3D7_1441200;size=825;Alias=12368864,Q8IL58,ribosomeStruct,124809402,AAN37004.1,PF14_0391,23497461,XP_001348565.1,12368867,PF3D7_1441200,811973,PF14_0391
0.000604526	0	0	NaN	Pf3D7_08_v3	1241966	1242895	ID=PF3D7_0828900;Name=PF3D7_0828900;description=conserved+Plasmodium+protein%2C+unknown+function;size=930;web_id=PF3D7_0828900;locus_tag=PF3D7_0828900;size=930;Alias=Pfal005255AAA,XP_001349237.1,2655456,PF08_0007,124512208,PF3D7_0828900,CAD51086.1,PF08_0007,Q8IBC0,23499006
0.000606809	0	0	NaN	Pf3D7_11_v3	1023790	1024496	ID=PF3D7_1126200;Name=PF3D7_1126200;description=40S+ribosomal+protein+S18%2C+putative;size=707;web_id=PF3D7_1126200;locus_tag=PF3D7_1126200;size=707;Alias=124804238,PF3D7_1126200,PF11_0272,XP_001347943.1,810819,ribosomeStruct,12368867,Q8IIA2,AAN35856.1,12368864,23496197,PF11_0272
0.000607497	0	0	NaN	Pf3D7_07_v3	1086570	1090357	ID=PF3D7_0726000;Name=PF3D7_0726000;description=28S+ribosomal+RNA;size=3788;web_id=PF3D7_0726000;locus_tag=PF3D7_0726000;size=3788;Alias=MAL7_28S:rRNA,PF3D7_0726000,MAL7_28S:rRNA
0.000613945	0	0	NaN	Pf3D7_13_v3	129717	131086	ID=PF3D7_1302400;Name=PF3D7_1302400;description=conserved+Plasmodium+membrane+protein%2C+unknown+function;size=1370;web_id=PF3D7_1302400;locus_tag=PF3D7_1302400;size=1370;Alias=MAL13P1.12,C0H596,MAL13P1.12,813669,PF3D7_1302400
0.000616412	0	0	NaN	Pf3D7_12_v3	1816069	1816448	ID=PF3D7_1243300;Name=PF3D7_1243300;description=conserved+Plasmodium+protein%2C+unknown+function;size=380;web_id=PF3D7_1243300;locus_tag=PF3D7_1243300;size=380;Alias=PFL2080c,124806745,811468,PFL2080c,PF3D7_1243300,XP_001350820.1,12368864,23496949,AAN36500.1,2277.t00416,MAL12P1.414,Q8I4Z7
0.000620428	0	0	NaN	Pf3D7_02_v3	809511	810298	ID=PF3D7_0220200;Name=PF3D7_0220200;description=Plasmodium+exported+protein%2C+unknown+function;size=788;web_id=PF3D7_0220200;locus_tag=PF3D7_0220200;size=788;Alias=812785,Q7KWI7,9804551,11738814,12368864,18143609,23503437,PFB0921c,124801470,PF02_0189,AAN37618.1,BAB79689.1,PF3D7_0220200,XP_001349703.1,PFB0921c
0.00063236	0	0	NaN	Pf3D7_14_v3	974006	974074	ID=PF3D7_1424200;Name=PF3D7_1424200;description=small+nucleolar+RNA+snoR25;size=69;web_id=PF3D7_1424200;locus_tag=PF3D7_1424200;size=69;Alias=RF01600,PF3D7_1424200,PF3D7_14_snoR25.1
0.000646076	0	0	NaN	Pf3D7_09_v3	185821	186383	ID=PF3D7_0903900;Name=PF3D7_0903900;description=60S+ribosomal+protein+L32%2C+putative;size=563;web_id=PF3D7_0903900;locus_tag=PF3D7_0903900;size=563;Alias=124506631,PF3D7_0903900,CAD51724.1,XP_001351913.1,ribosomeStruct,PFI0190w,PFI0190w,813318,Q8I3B0,23504940,12368867
0.000663866	0	0	NaN	Pf3D7_05_v3	1289601	1291692	ID=PF3D7_0531600;Name=PF3D7_0531600;description=18S+ribosomal+RNA;size=2092;web_id=PF3D7_0531600;locus_tag=PF3D7_0531600;size=2092;Alias=PF3D7_0531600,MAL5_18S:rRNA,MAL5_18S:rRNA
0.000665752	0	0	NaN	Pf3D7_09_v3	569124	570374	ID=PF3D7_0913000;Name=PF3D7_0913000;description=conserved+Plasmodium+protein%2C+unknown+function;size=1251;web_id=PF3D7_0913000;locus_tag=PF3D7_0913000;size=1251;Alias=XP_001352002.1,Q8I322,12368867,PFI0635c,PFI0635c,PF3D7_0913000,23505030,813407,CAD51813.1,124506809
0.000678782	0	0	NaN	Pf3D7_12_v3	1825959	1826884	ID=PF3D7_1243600;Name=PF3D7_1243600;description=translation+initiation+factor+SUI1%2C+putative;size=926;web_id=PF3D7_1243600;locus_tag=PF3D7_1243600;size=926;Alias=12368864,PFL2095w,AAN36503.1,MAL12P1.417,124806752,2277.t00419,intTranslation,23496952,PFL2095w,XP_001350823.1,Q8I4Z4,811471,PF3D7_1243600
0.000681151	0	0	NaN	Pf3D7_12_v3	1572371	1573557	ID=PF3D7_1237700;Name=PF3D7_1237700;description=conserved+Plasmodium+membrane+protein%2C+unknown+function;size=1187;web_id=PF3D7_1237700;locus_tag=PF3D7_1237700;size=1187;Alias=PF3D7_1237700,23496899,2277.t00365,811417,12368864,PFL1825w,Q8I546,124806612,PFL1825w,XP_001350771.1,AAN36451.1,MAL12P1.363
0.000681372	0	0	NaN	Pf3D7_04_v3	777200	779424	ID=PF3D7_0417500;Name=PF3D7_0417500;description=memo-like+protein;size=2225;web_id=PF3D7_0417500;locus_tag=PF3D7_0417500;size=2225;Alias=C0H4B1,9221809,12368867,PFD0850c,225631643,296004434,CAX63929.1,MAL4P1.165,PF3D7_0417500,XP_002808659.1,PFD0850c
0.000689061	0	0	NaN	Pf3D7_07_v3	68066	68840	ID=PF3D7_0701500;Name=PF3D7_0701500;description=Plasmodium+exported+protein+%28hyp4%29%2C+unknown+function;size=775;web_id=PF3D7_0701500;locus_tag=PF3D7_0701500;size=775;Alias=MAL7P1.4,MAL7P1.4,PF3D7_0701500,2655000
0.000696596	0	0	NaN	Pf3D7_11_v3	1922656	1922928	ID=PF3D7_1148500;Name=PF3D7_1148500;description=unspecified+product;size=273;web_id=PF3D7_1148500;locus_tag=PF3D7_1148500;size=273;Alias=PF3D7_1148500,PF11TR013:ncRNA
0.000706483	0	0	NaN	Pf3D7_11_v3	1546288	1547469	ID=PF3D7_1139000;Name=PF3D7_1139000;description=unspecified+product;size=1182;web_id=PF3D7_1139000;locus_tag=PF3D7_1139000;size=1182;Alias=PF3D7_1139000,PF11TR006:ncRNA
0.000706615	0	0	NaN	Pf3D7_12_v3	1893069	1893903	ID=PF3D7_1245300;Name=PF3D7_1245300;description=ubiquitin+conjugating+enzyme+E2%2C+putative;size=835;web_id=PF3D7_1245300;locus_tag=PF3D7_1245300;size=835;Alias=MAL12P1.433,2277.t00435,chaperone,PFL2175w,PF3D7_1245300,124806816,XP_001350839.1,PFL2175w,proteaUbiqpath,12368864,Q8I4X8,23496968,proteasome_new,SCF,AAN36519.1,complex_ubiquitin_ligase,811487
0.000712465	0	0	NaN	Pf3D7_12_v3	388545	389147	ID=PF3D7_1208300;Name=PF3D7_1208300;description=mitochondrial+ACP+precursor%2C+putative;size=603;web_id=PF3D7_1208300;locus_tag=PF3D7_1208300;size=603;Alias=AAN36172.1,23496615,Q8I0V5,811136,XP_001350492.1,PFL0415w,2277.t00084,MAL12P1.83,124805624,12368864,nuclearGenes,PF3D7_1208300,PFL0415w,12368867
0.00071553	0	0	NaN	Pf3D7_11_v3	1598550	1599632	ID=PF3D7_1140100;Name=PF3D7_1140100;description=vacuolar+ATP+synthase+subunit+f%2C+putative;size=1083;web_id=PF3D7_1140100;locus_tag=PF3D7_1140100;size=1083;Alias=XP_001348082.2,PF11_0412,PF11_0412,AAN35995.2,PPM,ERGolgiVacuole,254832702,transporters,12368864,12368867,PF3D7_1140100,Q8IHW4,258597383,810958
0.000730127	0	0	NaN	Pf3D7_02_v3	232729	233476	ID=PF3D7_0205800;Name=PF3D7_0205800;description=conserved+Plasmodium+protein%2C+unknown+function;size=748;web_id=PF3D7_0205800;locus_tag=PF3D7_0205800;size=748;Alias=C6S3B1,8445016,9804551,12368864,PFB0257c,254688455,258537818,ACT79304.1,PF3D7_0205800,XP_002585388.1,PFB0257c
0.000740927	0	0	NaN	Pf3D7_12_v3	1820881	1822595	ID=PF3D7_1243500;Name=PF3D7_1243500;description=endosome+sorting+protein+%28SNF7+homologue%29%2C+putative;size=1715;web_id=PF3D7_1243500;locus_tag=PF3D7_1243500;size=1715;Alias=2277.t00418,PFL2090c,811470,Q8I4Z5,MAL12P1.416,12368864,PFL2090c,PF3D7_1243500,largeTethering
0.000751348	0	0	NaN	Pf3D7_09_v3	761211	763358	ID=PF3D7_0918500;Name=PF3D7_0918500;description=telomerase+RNA;size=2148;web_id=PF3D7_0918500;locus_tag=PF3D7_0918500;size=2148;Alias=PFI0904w.1,PF3D7_0918500
0.000755459	0	0	NaN	Pf3D7_13_v3	2231883	2233248	ID=PF3D7_1356300;Name=PF3D7_1356300;description=ubiquitin+conjugating+enzyme%2C+putative;size=1366;web_id=PF3D7_1356300;locus_tag=PF3D7_1356300;size=1366;Alias=PF13_0301,proteaUbiqpath,23615691,XP_001350274.1,CAD52683.1,12368867,814264,ProteasomeMeditated,PF13_0301,proteasome_new,Q8IDD9,Pfal006597AAA,PF3D7_1356300,124513836
0.000771158	0	0	NaN	Pf3D7_11_v3	1759257	1759922	ID=PF3D7_1144300;Name=PF3D7_1144300;description=conserved+Plasmodium+protein%2C+unknown+function;size=666;web_id=PF3D7_1144300;locus_tag=PF3D7_1144300;size=666;Alias=8445040,148804430,156099107,12368864,221056616,XP_002585442.1,PF3D7_1144300,PF11_0455a,CAQ40219.1,XP_001615556.1,ACT82986.1,193809517,XP_002259446.1,EDL45829.1,254832717,C6S3G4,258549142,PF11_0455a
0.000772326	0	0	NaN	Pf3D7_12_v3	575540	576292	ID=PF3D7_1213000;Name=PF3D7_1213000;description=unspecified+product;size=753;web_id=PF3D7_1213000;locus_tag=PF3D7_1213000;size=753;Alias=PF12TR005:ncRNA,PF3D7_1213000
0.000772483	0	0	NaN	Pf3D7_01_v3	476403	477278	ID=PF3D7_0112600;Name=PF3D7_0112600;description=unspecified+product;size=876;web_id=PF3D7_0112600;locus_tag=PF3D7_0112600;size=876;Alias=PF3D7_0112600,MAL1_ITS2:rRNA,MAL1_ITS2:rRNA
0.000776413	0	0	NaN	Pf3D7_10_v3	984228	985330	ID=PF3D7_1023300;Name=PF3D7_1023300;description=conserved+Plasmodium+protein%2C+unknown+function;size=1103;web_id=PF3D7_1023300;locus_tag=PF3D7_1023300;size=1103;Alias=XP_001347510.2,810383,PF10_0226,12368864,258597091,PF10_0226,AAN35423.2,PF3D7_1023300,254922449,Q8IJH2
0.000782256	0	0	NaN	Pf3D7_06_v3	449291	451198	ID=PF3D7_0610600;Name=PF3D7_0610600;description=calcium-dependent+protein+kinase+%28CDPK2%29;size=1908;web_id=PF3D7_0610600;locus_tag=PF3D7_0610600;size=1908;Alias=nuclearGenes,60391914,Q8ICR0.3,chaperone,XP_966095.1,3885922,cont_micro_asse,MAL6P1.108,centrosome,PFF0520w,Q8ICR0,CDPK2,PFF0520w,PF3D7_0610600,46361060,86170841,calmodulin,2270.t00209,Protein_kinases,spindle_kinesin,CAG25347.1
0.000786928	0	0	NaN	Pf3D7_13_v3	875265	875847	ID=PF3D7_1321200;Name=PF3D7_1321200;description=conserved+protein%2C+unknown+function;size=583;web_id=PF3D7_1321200;locus_tag=PF3D7_1321200;size=583;Alias=MAL13P1.115,XP_001349951.1,813663,Q8IEA2,CAD52359.1,PF3D7_1321200,23615368,MAL13P1.115,124513190
0.000822076	0	0	NaN	Pf3D7_13_v3	960166	960646	ID=PF3D7_1322800;Name=PF3D7_1322800;description=conserved+Plasmodium+protein%2C+unknown+function;size=481;web_id=PF3D7_1322800;locus_tag=PF3D7_1322800;size=481;Alias=CAD52376.1,124513224,MAL13P1.128,XP_001349968.1,813678,23615385,MAL13P1.128,PF3D7_1322800,Q8IE87
0.000858771	0	0	NaN	Pf3D7_11_v3	1755438	1755935	ID=PF3D7_1144000;Name=PF3D7_1144000;description=40S+ribosomal+protein+S21e%2C+putative;size=498;web_id=PF3D7_1144000;locus_tag=PF3D7_1144000;size=498;Alias=PF3D7_1144000,12368864,AAN36034.1,PF11_0454,12368867,PF11_0454,XP_001348121.1,ribosomeStruct,810997,124804821,23496377,Q8IHS5
0.000868973	0	0	NaN	Pf3D7_07_v3	1083761	1085847	ID=PF3D7_0725600;Name=PF3D7_0725600;description=18S+ribosomal+RNA;size=2087;web_id=PF3D7_0725600;locus_tag=PF3D7_0725600;size=2087;Alias=MAL7_18S:rRNA,PF3D7_0725600,MAL7_18S:rRNA
0.00087121	0	0	NaN	Pf3D7_10_v3	383044	384793	ID=PF3D7_1009500;Name=PF3D7_1009500;description=metallopeptidase%2C+putative;size=1750;web_id=PF3D7_1009500;locus_tag=PF3D7_1009500;size=1750;Alias=254922395,proteases,PF10_0092,SUMOylation,PF10_0092,XP_001347377.2,Q8IJV0,12368864,258596999,810250,PF3D7_1009500,AAN35290.2
0.000873852	0	0	NaN	Pf3D7_02_v3	407900	408438	ID=PF3D7_0209900;Name=PF3D7_0209900;description=unspecified+product;size=539;web_id=PF3D7_0209900;locus_tag=PF3D7_0209900;size=539;Alias=PF3D7_0209900,PF02TR001:ncRNA
0.000877745	0	0	NaN	Pf3D7_11_v3	945470	946148	ID=PF3D7_1123900;Name=PF3D7_1123900;description=splicing+factor%2C+putative;size=679;web_id=PF3D7_1123900;locus_tag=PF3D7_1123900;size=679;Alias=Q8IIC4,XP_001347921.1,12368864,telomerase,Ribosomegenes,AAN35834.1,NucleoAssembly,12368867,PF11_0250,23496174,riboMaturation,PF11_0250,124804166,PF3D7_1123900,810797
0.000878033	0	0	NaN	Pf3D7_07_v3	824445	825884	ID=PF3D7_0718500;Name=PF3D7_0718500;description=prefoldin+subunit+3%2C+putative;size=1440;web_id=PF3D7_0718500;locus_tag=PF3D7_0718500;size=1440;Alias=CAD50932.1,MAL7P1.94,XP_001349087.1,2654962,12368867,Pf_chaperones,23498855,chapfold,124511908,PF3D7_0718500,Q8IBR6,MAL7P1.94
0.000891978	0	0	NaN	Pf3D7_14_v3	782049	782361	ID=PF3D7_1418800;Name=PF3D7_1418800;description=signal+recognition+particle+RNA;size=313;web_id=PF3D7_1418800;locus_tag=PF3D7_1418800;size=313;Alias=RF00017,PF3D7_1418800,PF14_0183a,PF14_0183
0.00089207	0	0	NaN	Pf3D7_13_v3	668360	670745	ID=PF3D7_1316000;Name=PF3D7_1316000;description=protein+kinase%2C+putative;size=2386;web_id=PF3D7_1316000;locus_tag=PF3D7_1316000;size=2386;Alias=nuclearGenes,C0H5B8,PF3D7_1316000,Protein_kinases,MAL13P1.84,MAL13P1.84,813975
0.000893019	0	0	NaN	Pf3D7_13_v3	1649113	1650649	ID=PF3D7_1341900;Name=PF3D7_1341900;description=vacuolar+ATP+synthase+subunit+d%2C+putative;size=1537;web_id=PF3D7_1341900;locus_tag=PF3D7_1341900;size=1537;Alias=XP_001350140.1,PPM,12368867,ERGolgiVacuole,transporters,PF3D7_1341900,PF13_0227,CAD52549.1,23615557,124513568,814194,Q8IDS0,PF13_0227
0.000898432	0	0	NaN	Pf3D7_08_v3	427492	427639	ID=PF3D7_0808500;Name=PF3D7_0808500;description=Plasmodium+RNA+of+unkown+function+RUF6-4;size=148;web_id=PF3D7_0808500;locus_tag=PF3D7_0808500;size=148;Alias=RF01581,PF3D7_0808500,MAL8P1.121a.1
0.000904056	0	0	NaN	Pf3D7_14_v3	887932	888120	ID=PF3D7_1421700;Name=PF3D7_1421700;description=unspecified+product;size=189;web_id=PF3D7_1421700;locus_tag=PF3D7_1421700;size=189;Alias=PF3D7_1421700,PF3D7_14_nc02.1
0.000908611	0	0	NaN	Pf3D7_14_v3	2459214	2459964	ID=PF3D7_1460300;Name=PF3D7_1460300;description=ribosomal+protein+L29%2C+putative;size=751;web_id=PF3D7_1460300;locus_tag=PF3D7_1460300;size=751;Alias=ACU12420.1,ribosomeStruct,258549226,12368864,255528901,C6S3J6,PF14_0575a,8444995,PF3D7_1460300,XP_002585472.1,PF14_0575a
0.000916683	0	0	NaN	Pf3D7_08_v3	830006	831454	ID=PF3D7_0818200;Name=PF3D7_0818200;description=14-3-3+protein%2C+putative;size=1449;web_id=PF3D7_0818200;locus_tag=PF3D7_0818200;size=1449;Alias=14-3-3prot,MAL8P1.69,MCprot,centrosome,2655418,acet_recog_mod,PF3D7_0818200,225632253,redoxReg,his_bind_mod,296005038,XP_002808856.1,MAL8P1.69,C0H4V6,CAX64133.1
0.000929665	0	0	NaN	Pf3D7_01_v3	477279	481382	ID=PF3D7_0112700;Name=PF3D7_0112700;description=28S+ribosomal+RNA;size=4104;web_id=PF3D7_0112700;locus_tag=PF3D7_0112700;size=4104;Alias=MAL1_28s:rRNA,PF3D7_0112700,MAL1_28s:rRNA
0.000935669	0	0	NaN	Pf3D7_07_v3	304315	304755	ID=PF3D7_0706200;Name=PF3D7_0706200;description=conserved+Plasmodium+protein%2C+unknown+function;size=441;web_id=PF3D7_0706200;locus_tag=PF3D7_0706200;size=441;Alias=MAL7P1.203b,MAL7P1.203b,9221879,PF3D7_0706200,C0H4L3
0.000936087	0	0	NaN	Pf3D7_11_v3	140048	140801	ID=PF3D7_1103100;Name=PF3D7_1103100;description=60S+ribosomal+protein+P1%2C+putative;size=754;web_id=PF3D7_1103100;locus_tag=PF3D7_1103100;size=754;Alias=12368867,12368864,ribosomeStruct,AAN35632.1,PF11_0043,23495969,810596,Q8IIX0,XP_001347719.1,PF11_0043,PF3D7_1103100,124803451
0.000939353	0	0	NaN	Pf3D7_03_v3	569308	571051	ID=PF3D7_0314100.1;Name=PF3D7_0314100.1;description=vesicle+transport+v-SNARE+protein%2C+putative;size=1744;web_id=PF3D7_0314100.1;locus_tag=PF3D7_0314100.1;size=1744;Alias=COPI,COPII,814455,C0H474,10448855,12368867,PFC0582c,rabCycle,PFC0582c,PF3D7_0314100.1,clathrintransport
0.000939353	0	0	NaN	Pf3D7_03_v3	569308	571051	ID=PF3D7_0314100.2;Name=PF3D7_0314100.2;description=vesicle+transport+v-SNARE+protein%2C+putative;size=1744;web_id=PF3D7_0314100.2;locus_tag=PF3D7_0314100.2;size=1744;Alias=PF3D7_0314100.2
0.000944381	0	0	NaN	Pf3D7_11_v3	459776	460620	ID=PF3D7_1112000;Name=PF3D7_1112000;description=conserved+Plasmodium+protein%2C+unknown+function;size=845;web_id=PF3D7_1112000;locus_tag=PF3D7_1112000;size=845;Alias=AAN35711.2,PF11_0126,810674,12368864,258597241,XP_001347798.2,PF11_0126,PF3D7_1112000,254832619,Q8IIP3
0.00095025	0	0	NaN	Pf3D7_14_v3	780006	780124	ID=PF3D7_1418600;Name=PF3D7_1418600;description=5S+ribosomal+RNA;size=119;web_id=PF3D7_1418600;locus_tag=PF3D7_1418600;size=119;Alias=MAL14_5S_2:rRNA,PF3D7_1418600,MAL14_5S_2:rRNA
0.000956585	0	0	NaN	Pf3D7_05_v3	828953	829883	ID=PF3D7_0520000;Name=PF3D7_0520000;description=40S+ribosomal+protein+S9%2C+putative;size=931;web_id=PF3D7_0520000;locus_tag=PF3D7_0520000;size=931;Alias=PFE1005w,ribosomeStruct,PFE1005w,XP_001351758.1,PF3D7_0520000,813016,23504687,Q8I3R0,12368867,MAL5P1.201,CAD51565.1,124506321
0.000956829	0	0	NaN	Pf3D7_01_v3	218948	219223	ID=PF3D7_0105000;Name=PF3D7_0105000;description=unspecified+product;size=276;web_id=PF3D7_0105000;locus_tag=PF3D7_0105000;size=276;Alias=PF3D7_0105000,PF01TR001:ncRNA
0.000966183	0	0	NaN	Pf3D7_11_v3	104300	104852	ID=PF3D7_1102100;Name=PF3D7_1102100;description=Plasmodium+exported+protein%2C+unknown+function%2C+pseudogene;size=553;web_id=PF3D7_1102100;locus_tag=PF3D7_1102100;size=553;Alias=PF11_0033a,PF3D7_1102100
0.000972768	0	0	NaN	Pf3D7_14_v3	1889413	1889529	ID=PF3D7_1446000;Name=PF3D7_1446000;description=U5+spliceosomal+RNA;size=117;web_id=PF3D7_1446000;locus_tag=PF3D7_1446000;size=117;Alias=RF00020,PF3D7_1446000,U5RNA:snRNA
0.000974979	0	0	NaN	Pf3D7_11_v3	425904	426864	ID=PF3D7_1110600;Name=PF3D7_1110600;description=mitochondrial+ribosomal+protein+L11+precursor%2C+putative;size=961;web_id=PF3D7_1110600;locus_tag=PF3D7_1110600;size=961;Alias=PF3D7_1110600,258597237,810662,PF11_0113,XP_001347786.2,Q8IIQ5,PF11_0113,254832615,AAN35699.2,12368867,ribosomeStruct,nuclearGenes,12368864
0.000997102	0	0	NaN	Pf3D7_05_v3	1292410	1296199	ID=PF3D7_0532000;Name=PF3D7_0532000;description=28S+ribosomal+RNA;size=3790;web_id=PF3D7_0532000;locus_tag=PF3D7_0532000;size=3790;Alias=MAL5_28S:rRNA,MAL5_28S:rRNA,PF3D7_0532000
0.000997418	0	0	NaN	Pf3D7_14_v3	2628882	2629789	ID=PF3D7_1464800;Name=PF3D7_1464800;description=conserved+Plasmodium+protein%2C+unknown+function;size=908;web_id=PF3D7_1464800;locus_tag=PF3D7_1464800;size=908;Alias=PF3D7_1464800,PF14_0615a,PF14_615a:1:pep,PF14_0615a,258549234,ACU12424.1,PF14_615a,8444968,255528913,C6S3K0,PF14_615a:mRNA:1,XP_002585476.1,12368864
0.00100455	0	0	NaN	Pf3D7_01_v3	328431	329304	ID=PF3D7_0108000;Name=PF3D7_0108000;description=beta3+proteasome+subunit%2C+putative;size=874;web_id=PF3D7_0108000;locus_tag=PF3D7_0108000;size=874;Alias=23510655,PFA0400c,124505797,MAL1P2.08,proteases,CAD49040.1,PF3D7_0108000,XP_001351012.1,PFA0400c,proteaUbiqpath,proteasome_new
0.00100736	0	0	NaN	Pf3D7_01_v3	393875	394835	ID=PF3D7_0110400;Name=PF3D7_0110400;description=DNA-directed+RNA+polymerase+2%2C+putative;size=961;web_id=PF3D7_0110400;locus_tag=PF3D7_0110400;size=961;Alias=23510676,PFA0505c,124505839,MAL1P2.30,RNApolyII,CAD49061.1,PF3D7_0110400,RNApolyStruct,XP_001351033.1,PFA0505c
0.00101829	0	0	NaN	Pf3D7_13_v3	1067097	1067685	ID=PF3D7_1325600;Name=PF3D7_1325600;description=conserved+Plasmodium+protein%2C+unknown+function;size=589;web_id=PF3D7_1325600;locus_tag=PF3D7_1325600;size=589;Alias=XP_001349995.1,MAL13P1.139,124513278,apoptosis,nuclearGenes,PF3D7_1325600,23615412,mitodiv,MAL13P1.139,813689,Pf_chaperones,Q8IE63,CAD52403.1
0.00101975	0	0	NaN	Pf3D7_11_v3	546632	546979	ID=PF3D7_1114300;Name=PF3D7_1114300;description=unspecified+product;size=348;web_id=PF3D7_1114300;locus_tag=PF3D7_1114300;size=348;Alias=PF11TR003:ncRNA,PF3D7_1114300
0.00102227	0	0	NaN	Pf3D7_09_v3	1278007	1278896	ID=PF3D7_0932000;Name=PF3D7_0932000;description=conserved+Plasmodium+protein%2C+unknown+function;size=890;web_id=PF3D7_0932000;locus_tag=PF3D7_0932000;size=890;Alias=C0H583,813591,PFI1555w,225631866,PFI1555w,296005299,CAX64261.1,PF3D7_0932000,XP_002808980.1,12368867
0.0010401	0	0	NaN	Pf3D7_10_v3	1122962	1124037	ID=PF3D7_1026800;Name=PF3D7_1026800;description=40S+ribosomal+protein+S2B%2C+putative;size=1076;web_id=PF3D7_1026800;locus_tag=PF3D7_1026800;size=1076;Alias=12368867,23495130,810421,74930131,PF10_0264,AAN35461.1,XP_001347548.1,ribosomeStruct,Q8IJD4,PF10_0264,PF3D7_1026800,124802649,Q8IJD4.1,12368864
0.0010424	0	0	NaN	Pf3D7_14_v3	1061805	1062779	ID=PF3D7_1427200;Name=PF3D7_1427200;description=unspecified+product+%28Sel4%29;size=975;web_id=PF3D7_1427200;locus_tag=PF3D7_1427200;size=975;Alias=PF14_0251,Sel4,PF3D7_1427200,Q8ILJ2,811833,PF14_0251,selenocysteine
0.0010425	0	0	NaN	Pf3D7_11_v3	1396433	1396764	ID=PF3D7_1135700;Name=PF3D7_1135700;description=conserved+Plasmodium+protein%2C+unknown+function;size=332;web_id=PF3D7_1135700;locus_tag=PF3D7_1135700;size=332;Alias=XP_002585435.1,PF11_0368a,PF11_0368a,8445033,12368864,C6S3F6,258549128,PF3D7_1135700,ACT82978.1,254832686
0.00104414	0	0	NaN	Pf3D7_11_v3	1569604	1573189	ID=PF3D7_1139400;Name=PF3D7_1139400;description=unspecified+product;size=3586;web_id=PF3D7_1139400;locus_tag=PF3D7_1139400;size=3586;Alias=PF3D7_1139400,PF11TR008:ncRNA
0.00105502	0	0	NaN	Pf3D7_10_v3	1362149	1363069	ID=PF3D7_1034100;Name=PF3D7_1034100;description=conserved+Plasmodium+protein%2C+unknown+function;size=921;web_id=PF3D7_1034100;locus_tag=PF3D7_1034100;size=921;Alias=XP_002585419.1,258549093,PF10_0331a,PF10_0331a,12368864,ACT83907.1,PF3D7_1034100,254922487,C6S3E2,8444951
0.00105616	0	0	NaN	Pf3D7_12_v3	1803653	1804483	ID=PF3D7_1242700;Name=PF3D7_1242700;description=40S+ribosomal+protein+S17%2C+putative;size=831;web_id=PF3D7_1242700;locus_tag=PF3D7_1242700;size=831;Alias=AAN36495.1,PF3D7_1242700,12368867,XP_001350815.1,23496944,Q8I502,MAL12P1.409,124806733,ribosomeStruct,2277.t00411,PFL2055w,12368864,PFL2055w,811463
0.00105629	0	0	NaN	Pf3D7_10_v3	1089997	1090538	ID=PF3D7_1025800;Name=PF3D7_1025800;description=conserved+Plasmodium+protein%2C+unknown+function;size=542;web_id=PF3D7_1025800;locus_tag=PF3D7_1025800;size=542;Alias=254922461,PF3D7_1025800,258549079,XP_002585412.1,ACT83900.1
0.00106253	0	0	NaN	Pf3D7_11_v3	1735126	1736572	ID=PF3D7_1143400;Name=PF3D7_1143400;description=translation+initiation+factor+eIF-1A%2C+putative;size=1447;web_id=PF3D7_1143400;locus_tag=PF3D7_1143400;size=1447;Alias=PF3D7_1143400,254832713,258597404,PF11_0447,intTranslation,12368864,XP_001348114.2,PF11_0447,12368867,Q8IHT2,810990,AAN36027.2
0.00106964	0	0	NaN	Pf3D7_07_v3	986598	987365	ID=PF3D7_0723600;Name=PF3D7_0723600;description=conserved+Plasmodium+protein%2C+unknown+function;size=768;web_id=PF3D7_0723600;locus_tag=PF3D7_0723600;size=768;Alias=PF07_0099,Q8IBL7,23498905,2655143,PF3D7_0723600,124512008,PF07_0099,CAD50983.1,XP_001349137.1
0.00108082	0	0	NaN	Pf3D7_08_v3	798777	800205	ID=PF3D7_0817500;Name=PF3D7_0817500;description=protein+kinase+c+inhibitor-like+protein%2C+putative;size=1429;web_id=PF3D7_0817500;locus_tag=PF3D7_0817500;size=1429;Alias=PF3D7_0817500,adenylyl,Protein_kinases,PF08_0059,12368867,2655259,296005031,PF08_0059,225632250,CAD51199.2,Q7K6B1,XP_001349350.2
0.00108615	0	0	NaN	Pf3D7_08_v3	474458	474937	ID=PF3D7_0809300;Name=PF3D7_0809300;description=unspecified+product;size=480;web_id=PF3D7_0809300;locus_tag=PF3D7_0809300;size=480;Alias=PF08TR001:ncRNA,PF3D7_0809300
0.00108781	0	0	NaN	Pf3D7_10_v3	701746	702422	ID=PF3D7_1017500;Name=PF3D7_1017500;description=conserved+Plasmodium+protein%2C+unknown+function;size=677;web_id=PF3D7_1017500;locus_tag=PF3D7_1017500;size=677;Alias=23495035,Q8IJM4,124802384,PF10_0170,AAN35368.1,12368864,810328,PF3D7_1017500,PF10_0170,XP_001347455.1
0.00109381	0	0	NaN	Pf3D7_05_v3	262672	263925	ID=PF3D7_0506400;Name=PF3D7_0506400;description=conserved+Plasmodium+protein%2C+unknown+function;size=1254;web_id=PF3D7_0506400;locus_tag=PF3D7_0506400;size=1254;Alias=MAL5P1.64,PFE0315c,812894,12368867,XP_002808679.1,CAX63950.1,PFE0315c,225631664,PF3D7_0506400,296004516,C0H4C8
0.00110318	0	0	NaN	Pf3D7_12_v3	1203582	1204752	ID=PF3D7_1229200;Name=PF3D7_1229200;description=unspecified+product;size=1171;web_id=PF3D7_1229200;locus_tag=PF3D7_1229200;size=1171;Alias=PF3D7_1229200,PF12TR011:ncRNA
0.00111306	0	0	NaN	Pf3D7_03_v3	534239	535238	ID=PF3D7_0312800;Name=PF3D7_0312800;description=60S+ribosomal+protein+L26%2C+putative;size=1000;web_id=PF3D7_0312800;locus_tag=PF3D7_0312800;size=1000;Alias=814443,O77364,3764026,10448855,12368867,PFC0535w,124504913,MAL3P4.28,CAA15619.1,PF3D7_0312800,XP_001351199.1,PFC0535w,ribosomeStruct
0.00112297	0	0	NaN	Pf3D7_07_v3	720010	721467	ID=PF3D7_0716400;Name=PF3D7_0716400;description=conserved+Plasmodium+protein%2C+unknown+function;size=1458;web_id=PF3D7_0716400;locus_tag=PF3D7_0716400;size=1458;Alias=RNApolyIII,MAL7P1.78,2655043,MAL7P1.78,PF3D7_0716400,Q8IBT6,RNApolyII
0.00112384	0	0	NaN	Pf3D7_11_v3	1708066	1708679	ID=PF3D7_1142600;Name=PF3D7_1142600;description=60S+ribosomal+protein+L35ae%2C+putative;size=614;web_id=PF3D7_1142600;locus_tag=PF3D7_1142600;size=614;Alias=AAN36020.1,XP_001348107.1,ribosomeStruct,810983,12368867,12368864,PF11_0438,PF11_0438,23496363,Q8IHT9,124804772,PF3D7_1142600
0.00113807	0	0	NaN	Pf3D7_11_v3	446020	446559	ID=PF3D7_1111500;Name=PF3D7_1111500;description=acylphosphatase%2C+putative;size=540;web_id=PF3D7_1111500;locus_tag=PF3D7_1111500;size=540;Alias=XP_002585427.1,12368864,ACT82970.1,258549112,glycolysispath,PF11_0121,PF3D7_1111500,PF11_0121,8444977,C6S3F0,254832617
0.00113956	0	0	NaN	Pf3D7_02_v3	192818	194199	ID=PF3D7_0204200;Name=PF3D7_0204200;description=conserved+Plasmodium+protein%2C+unknown+function;size=1382;web_id=PF3D7_0204200;locus_tag=PF3D7_0204200;size=1382;Alias=812636,Q8I665,9804551,11738814,12368864,23503357,PFB0194w,124800760,PF02_0040,AAN37607.1,PF3D7_0204200,XP_001349554.1,PFB0194w
0.0011705	0	0	NaN	Pf3D7_13_v3	2562118	2562713	ID=PF3D7_1363900;Name=PF3D7_1363900;description=unspecified+product;size=596;web_id=PF3D7_1363900;locus_tag=PF3D7_1363900;size=596;Alias=PF3D7_1363900,PF13TR006:ncRNA
0.00118253	0	0	NaN	Pf3D7_08_v3	1294022	1294722	ID=PF3D7_0830400;Name=PF3D7_0830400;description=conserved+Plasmodium+protein%2C+unknown+function;size=701;web_id=PF3D7_0830400;locus_tag=PF3D7_0830400;size=701;Alias=PF08_0004,11738814,CAD51076.1,23498996,124512188,Q8IBD0,XP_001349227.1,2655453,PF3D7_0830400,PF08_0004
0.00118454	0	0	NaN	Pf3D7_09_v3	1180983	1181996	ID=PF3D7_0929500;Name=PF3D7_0929500;description=conserved+Plasmodium+protein%2C+unknown+function;size=1014;web_id=PF3D7_0929500;locus_tag=PF3D7_0929500;size=1014;Alias=PFI1450c,CAX64249.1,C0H572,PF3D7_0929500,XP_002808968.1,PFI1450c,225631854,813570,296005273,12368867
0.00118581	0	0	NaN	Pf3D7_11_v3	1888637	1889139	ID=PF3D7_1147400;Name=PF3D7_1147400;description=conserved+Plasmodium+protein%2C+unknown+function;size=503;web_id=PF3D7_1147400;locus_tag=PF3D7_1147400;size=503;Alias=PF11_0483a,PF3D7_1147400,ACT82990.1,8444985,XP_002585446.1,PF11_0483a,C6S3G8,254832733,12368864,258549150
0.00119384	0	0	NaN	Pf3D7_10_v3	138765	139853	ID=PF3D7_1002900;Name=PF3D7_1002900;description=conserved+Plasmodium+protein%2C+unknown+function;size=1089;web_id=PF3D7_1002900;locus_tag=PF3D7_1002900;size=1089;Alias=810191,Q8IK07,PF3D7_1002900,XP_001347318.2,254922374,12368864,PF10_0033,PF10_0033,258596969,AAN35231.2
0.00120931	0	0	NaN	Pf3D7_12_v3	633892	634545	ID=PF3D7_1215500;Name=PF3D7_1215500;description=conserved+Plasmodium+protein%2C+unknown+function;size=654;web_id=PF3D7_1215500;locus_tag=PF3D7_1215500;size=654;Alias=12368864,258549157,254945369,XP_002585482.1,8445047,PFL0746c,PFL0746c,ACT90630.1,C6S3K6,PF3D7_1215500
0.00124389	0	0	NaN	Pf3D7_12_v3	1010832	1011342	ID=PF3D7_1224900;Name=PF3D7_1224900;description=splicing+factor+3b+subunit%2C+putative+%28SF3B14%29;size=511;web_id=PF3D7_1224900;locus_tag=PF3D7_1224900;size=511;Alias=PFL1200c,PFL1200c,MAL12P1.240,SF3B14,811292,XP_001350646.1,124806165,23496772,splicing,Q8I5G8,AAN36326.1,2277.t00240,12368864,PF3D7_1224900
0.00124858	0	0	NaN	Pf3D7_14_v3	210300	210960	ID=PF3D7_1406000;Name=PF3D7_1406000;description=RNA+binding+protein%2C+putative;size=661;web_id=PF3D7_1406000;locus_tag=PF3D7_1406000;size=661;Alias=PF14_0057,23497120,12368864,PF3D7_1406000,Q8IM34,qualityControl,PF14_0057,12368867,AAN36669.1,XP_001348230.1,811639,124808101
0.00126411	0	0	NaN	Pf3D7_02_v3	766390	767015	ID=PF3D7_0218800;Name=PF3D7_0218800;description=ribonuclease+P;size=626;web_id=PF3D7_0218800;locus_tag=PF3D7_0218800;size=626;Alias=RF01577,PFB0876c.1,PF3D7_0218800
0.00126492	0	0	NaN	Pf3D7_13_v3	1621292	1622718	ID=PF3D7_1340700;Name=PF3D7_1340700;description=Rab+GTPase+11b+%28RAB11b%29;size=1427;web_id=PF3D7_1340700;locus_tag=PF3D7_1340700;size=1427;Alias=rabIntracellular,rabCycle,MAL13P1.205,813763,CAI51864.1,58864726,proteins,PF3D7_1340700,MAL13P1.375,RAB11b,MAL13P1.205,C0H5G2
0.00128583	0	0	NaN	Pf3D7_08_v3	682518	683572	ID=PF3D7_0814100;Name=PF3D7_0814100;description=conserved+Plasmodium+protein%2C+unknown+function;size=1055;web_id=PF3D7_0814100;locus_tag=PF3D7_0814100;size=1055;Alias=2655444,PF3D7_0814100,225632240,MAL8P1.93,MAL8P1.93,296005009,C0H4U6,XP_002808845.1,CAX64122.1
0.00128717	0	0	NaN	Pf3D7_12_v3	1907045	1907960	ID=PF3D7_1245700;Name=PF3D7_1245700;description=unspecified+product;size=916;web_id=PF3D7_1245700;locus_tag=PF3D7_1245700;size=916;Alias=PF3D7_1245700,PF12TR016:ncRNA
0.00128802	0	0	NaN	Pf3D7_06_v3	421157	422622	ID=PF3D7_0609800;Name=PF3D7_0609800;description=zinc+finger+protein%2C+putative;size=1466;web_id=PF3D7_0609800;locus_tag=PF3D7_0609800;size=1466;Alias=PF3D7_0609800,CAG25340.1,12368867,XP_966088.1,C6KSU5,2270.t00216,prenylation,46361053,86170805,3885878,PFF0485c,MAL6P1.101,PFF0485c
0.00128903	0	0	NaN	Pf3D7_11_v3	1540804	1544163	ID=PF3D7_1138900;Name=PF3D7_1138900;description=unspecified+product;size=3360;web_id=PF3D7_1138900;locus_tag=PF3D7_1138900;size=3360;Alias=PF11TR005:ncRNA,PF3D7_1138900
0.00132703	0	0	NaN	Pf3D7_07_v3	838990	840024	ID=PF3D7_0719100;Name=PF3D7_0719100;description=conserved+Plasmodium+protein%2C+unknown+function;size=1035;web_id=PF3D7_0719100;locus_tag=PF3D7_0719100;size=1035;Alias=MAL7P1.99,CAD50938.1,124511920,2654966,Q8IBR0,MAL7P1.99,PF3D7_0719100,23498861,XP_001349093.1
0.00138817	0	0	NaN	Pf3D7_10_v3	259060	260304	ID=PF3D7_1006100;Name=PF3D7_1006100;description=CCR4-NOT+transcription+complex+subunit+5%2C+putative+%28NOT5%29;size=1245;web_id=PF3D7_1006100;locus_tag=PF3D7_1006100;size=1245;Alias=PF10_0062,810220,CCR4,PF3D7_1006100,Q8IJX9,12368864,P_body,Factors,NOT5,PF10_0062
0.00141218	0	0	NaN	Pf3D7_14_v3	780916	781034	ID=PF3D7_1418700;Name=PF3D7_1418700;description=5S+ribosomal+RNA;size=119;web_id=PF3D7_1418700;locus_tag=PF3D7_1418700;size=119;Alias=MAL14_5S_3:rRNA,PF3D7_1418700,MAL14_5S_3:rRNA
0.00141752	0	0	NaN	Pf3D7_06_v3	74254	74362	ID=PF3D7_0601800;Name=PF3D7_0601800;description=unspecified+product;size=109;web_id=PF3D7_0601800;locus_tag=PF3D7_0601800;size=109;Alias=PF3D7_06ncRNA1.1,PF3D7_0601800
0.00141875	0	0	NaN	Pf3D7_12_v3	190105	193113	ID=PF3D7_1203800;Name=PF3D7_1203800;description=unspecified+product;size=3009;web_id=PF3D7_1203800;locus_tag=PF3D7_1203800;size=3009;Alias=PF3D7_1203800,PF12TR001:ncRNA,PF12TR002
0.0014362	0	0	NaN	Pf3D7_06_v3	1170813	1173696	ID=PF3D7_0628300;Name=PF3D7_0628300;description=choline%2Fethanolaminephosphotransferase%2C+putative+%28CEPT%29;size=2884;web_id=PF3D7_0628300;locus_tag=PF3D7_0628300;size=2884;Alias=PFF1375c,PFF1375c,MAL6P1.145,CAG25096.2,PF3D7_0628300,2270.t00171,3885724,CEPT,296004732,C6KTB9,phserine,12368867,phcholine,XP_966266.2,225631772
0.00144358	0	0	NaN	Pf3D7_01_v3	334866	336314	ID=PF3D7_0108200;Name=PF3D7_0108200;description=unspecified+product;size=1449;web_id=PF3D7_0108200;locus_tag=PF3D7_0108200;size=1449;Alias=PF3D7_0108200,PF01TR004:ncRNA
0.00145978	0	0	NaN	Pf3D7_14_v3	884398	885074	ID=PF3D7_1421500;Name=PF3D7_1421500;description=mitochondrial+protein+import+protein+TIM13%2C+putative;size=677;web_id=PF3D7_1421500;locus_tag=PF3D7_1421500;size=677;Alias=XP_001348382.1,23497275,PF14_0208,AAN36821.1,124808686,Q8ILN5,PF3D7_1421500,nuclearGenes,12368864,PF14_0208,importMito,811790
0.00146761	0	0	NaN	Pf3D7_10_v3	1505835	1506896	ID=PF3D7_1038000.1;Name=PF3D7_1038000.1;description=antigen+UB05;size=1062;web_id=PF3D7_1038000.1;locus_tag=PF3D7_1038000.1;size=1062;Alias=258597165,254922496,ABB16419.1,77998077,XP_001347656.2,12368864,Q8IJ28,PF10_0372,PF10_0372,PF3D7_1038000.1,810529,AAN35569.2
0.00146761	0	0	NaN	Pf3D7_10_v3	1505835	1506896	ID=PF3D7_1038000.2;Name=PF3D7_1038000.2;description=antigen+UB05;size=1062;web_id=PF3D7_1038000.2;locus_tag=PF3D7_1038000.2;size=1062;Alias=PF3D7_1038000.2
0.00147149	0	0	NaN	Pf3D7_08_v3	976074	976644	ID=PF3D7_0821800;Name=PF3D7_0821800;description=secretory+complex+protein+61+beta+subunit+%28Sec61-beta%29;size=571;web_id=PF3D7_0821800;locus_tag=PF3D7_0821800;size=571;Alias=MAL8P1.51,C0H4W6,CAX64144.1,Sec61-beta,XP_002808866.1,296005058,eukaryotes,12368867,ProteasomeMeditated,SRPmTargeting,2655350,225632263,PF3D7_0821800,MAL8P1.51
0.00147386	0	0	NaN	Pf3D7_12_v3	2017364	2018469	ID=PF3D7_1249500;Name=PF3D7_1249500;description=cutA%2C+putative;size=1106;web_id=PF3D7_1249500;locus_tag=PF3D7_1249500;size=1106;Alias=nuclearGenes,811527,MAL12P1.473,23497009,AAN36559.1,124806981,XP_001350879.1,Q8I4T9,PF3D7_1249500,2277.t00475,PFL2375c,PFL2375c,12368864
0.00148721	0	0	NaN	Pf3D7_12_v3	1208912	1209542	ID=PF3D7_1229400;Name=PF3D7_1229400;description=macrophage+migration+inhibitory+factor+%28MIF%29;size=631;web_id=PF3D7_1229400;locus_tag=PF3D7_1229400;size=631;Alias=PFL1420w,2277.t00284,MCprot,AAN36370.1,45478049,124806320,MAL12P1.284,PFL1420w,PF3D7_1229400,AAS66355.1,Q8I5C5,45478047,AAS66354.1,MIF,phenylTyrmetpath,23496816,811336,XP_001350690.1
0.00150164	0	0	NaN	Pf3D7_01_v3	475888	476281	ID=PF3D7_0112400;Name=PF3D7_0112400;description=unspecified+product;size=394;web_id=PF3D7_0112400;locus_tag=PF3D7_0112400;size=394;Alias=PF3D7_0112400,MAL1_ITS1:rRNA,MAL1_ITS1:rRNA
0.00151522	0	0	NaN	Pf3D7_09_v3	1120100	1121331	ID=PF3D7_0927500;Name=PF3D7_0927500;description=dynein+light+chain%2C+putative;size=1232;web_id=PF3D7_0927500;locus_tag=PF3D7_0927500;size=1232;Alias=12368867,813550,Kinetochore,organizKinetochore,PFI1350c,mitoticCentro,296005265,centrosome,225631850,PF3D7_0927500,C0H568,microtubuleDynam,CAX64245.1,PFI1350c,XP_002808964.1
0.00153352	0	0	NaN	Pf3D7_14_v3	532818	533289	ID=PF3D7_1413300;Name=PF3D7_1413300;description=conserved+Plasmodium+protein%2C+unknown+function;size=472;web_id=PF3D7_1413300;locus_tag=PF3D7_1413300;size=472;Alias=258549184,PF3D7_1413300,8445035,PF14_0132a,C6S3H5,255528776,ACU12399.1,PF14_0132a,12368864,XP_002585451.1
0.00154572	0	0	NaN	Pf3D7_06_v3	488579	489287	ID=PF3D7_0611700;Name=PF3D7_0611700;description=60S+ribosomal+protein+L39%2C+putative;size=709;web_id=PF3D7_0611700;locus_tag=PF3D7_0611700;size=709;Alias=296004646,225631729,PFF0573c,PFF0573c,9221869,PF3D7_0611700,XP_002808723.1,ribosomeStruct,12368867,C0H4H3,CAX63995.1
0.00157228	0	0	NaN	Pf3D7_08_v3	1272718	1275456	ID=PF3D7_0829800;Name=PF3D7_0829800;description=unspecified+product;size=2739;web_id=PF3D7_0829800;locus_tag=PF3D7_0829800;size=2739;Alias=PF08TR004:ncRNA,PF3D7_0829800
0.00157633	0	0	NaN	Pf3D7_13_v3	834180	835308	ID=PF3D7_1320100;Name=PF3D7_1320100;description=ATP-dependent+Clp+protease+adaptor+protein+ClpS%2C+putative;size=1129;web_id=PF3D7_1320100;locus_tag=PF3D7_1320100;size=1129;Alias=124513168,XP_001349940.1,23615357,PF3D7_1320100,proteases,MAL13P1.111,apicoplastgene,MAL13P1.111,CAD52348.1,chapfold,813659,Q8IEB2
0.00161489	0	0	NaN	Pf3D7_13_v3	245199	246175	ID=PF3D7_1304900;Name=PF3D7_1304900;description=DNA-directed+RNA+polymerase+2%2C+putative;size=977;web_id=PF3D7_1304900;locus_tag=PF3D7_1304900;size=977;Alias=RNApolyII,23615192,PF3D7_1304900,Q8IER7.1,PF13_0023,CAD52182.1,814002,12368867,74843039,XP_001349775.1,PF13_0023,124512838,RNApolyStruct,Q8IER7
0.00165582	0	0	NaN	Pf3D7_11_v3	1772350	1773819	ID=PF3D7_1144700;Name=PF3D7_1144700;description=apicoplast+import+protein+Tic20%2C+putative+%28TIC20%29;size=1470;web_id=PF3D7_1144700;locus_tag=PF3D7_1144700;size=1470;Alias=11738814,Q8IHS0,PF3D7_1144700,811002,AAN36039.2,XP_001348126.2,PF11_0459,12368864,254832718,258597410,TIC20,PF11_0459
0.00165824	0	0	NaN	Pf3D7_08_v3	91397	97571	ID=PF3D7_0801100;Name=PF3D7_0801100;description=unspecified+product;size=6175;web_id=PF3D7_0801100;locus_tag=PF3D7_0801100;size=6175;Alias=MAL8b_28s:ncRNA,PF3D7_0801100
0.00165938	0	0	NaN	Pf3D7_07_v3	1235699	1236707	ID=PF3D7_0729000;Name=PF3D7_0729000;description=signal+recognition+particle+SRP9+%28SRP9%29;size=1009;web_id=PF3D7_0729000;locus_tag=PF3D7_0729000;size=1009;Alias=SRP9,PF3D7_0729000,AEA07715.1,SRPmTargeting,225632186,CAX64070.1,MAL7P1.158,326787497,C0H4Q0,296004901,12368867,MAL7P1.158,2655034,XP_002808797.1
0.00167701	0	0	NaN	Pf3D7_14_v3	1706520	1707512	ID=PF3D7_1442100;Name=PF3D7_1442100;description=conserved+Plasmodium+protein%2C+unknown+function;size=993;web_id=PF3D7_1442100;locus_tag=PF3D7_1442100;size=993;Alias=255528857,XP_002585462.1,C6S3I6,ACU12410.1,PF14_0783,PF3D7_1442100,8444955,PF14_0783,258549206,12368864
0.00168878	0	0	NaN	Pf3D7_11_v3	320128	321205	ID=PF3D7_1107500;Name=PF3D7_1107500;description=prefoldin%2C+putative;size=1078;web_id=PF3D7_1107500;locus_tag=PF3D7_1107500;size=1078;Alias=810639,PF11_0088,Q8IIS7,254832606,XP_001347763.2,Pf_chaperones,AAN35676.2,12368864,PF11_0088,258597227,PF3D7_1107500
0.001762	0	0	NaN	Pf3D7_08_v3	1280935	1283761	ID=PF3D7_0830100;Name=PF3D7_0830100;description=unspecified+product;size=2827;web_id=PF3D7_0830100;locus_tag=PF3D7_0830100;size=2827;Alias=PF08TR007:ncRNA,PF3D7_0830100
0.00177229	0	0	NaN	Pf3D7_05_v3	527639	528666	ID=PF3D7_0512000;Name=PF3D7_0512000;description=prefoldin+subunit%2C+putative;size=1028;web_id=PF3D7_0512000;locus_tag=PF3D7_0512000;size=1028;Alias=12368867,XP_002808685.1,226700240,Q8I3Y6,PF3D7_0512000,Q8I3Y6.2,225631670,Pf_chaperones,PFE0595w,812934,chapfold,MAL5P1.120,CAX63956.1,296004528,PFE0595w
0.00181715	0	0	NaN	Pf3D7_14_v3	3247032	3251019	ID=PF3D7_1478900;Name=PF3D7_1478900;description=unspecified+product;size=3988;web_id=PF3D7_1478900;locus_tag=PF3D7_1478900;size=3988;Alias=PF14TR009,PF3D7_1478900,PF14TR010,PF14TR008:ncRNA,PF14TR011
0.00182371	0	0	NaN	Pf3D7_07_v3	1086372	1086569	ID=PF3D7_0725900;Name=PF3D7_0725900;description=unspecified+product;size=198;web_id=PF3D7_0725900;locus_tag=PF3D7_0725900;size=198;Alias=MAL7_ITS2:rRNA,MAL7_ITS2:rRNA,PF3D7_0725900
0.00185042	0	0	NaN	Pf3D7_04_v3	223711	224131	ID=PF3D7_0404000;Name=PF3D7_0404000;description=conserved+Plasmodium+protein%2C+unknown+function;size=421;web_id=PF3D7_0404000;locus_tag=PF3D7_0404000;size=421;Alias=812461,Q8I1Y9,12368867,23498160,PFD0195c,124505221,MAL4P1.39,CAD49132.1,PF3D7_0404000,XP_001351352.1,PFD0195c
0.00190016	0	0	NaN	Pf3D7_01_v3	357834	360339	ID=PF3D7_0108800;Name=PF3D7_0108800;description=conserved+Plasmodium+protein%2C+unknown+function;size=2506;web_id=PF3D7_0108800;locus_tag=PF3D7_0108800;size=2506;Alias=23510662,PFA0435w,124505811,MAL1P2.16,CAD49047.1,nuclearGenes,transporters,PF3D7_0108800,XP_001351019.1,PFA0435w
0.00190415	0	0	NaN	Pf3D7_13_v3	2169314	2170416	ID=PF3D7_1354400;Name=PF3D7_1354400;description=V-type+ATPase%2C+putative;size=1103;web_id=PF3D7_1354400;locus_tag=PF3D7_1354400;size=1103;Alias=23615673,CAD52665.1,MAL13P1.271,124513800,transporters,ERGolgiVacuole,MAL13P1.271,12368867,813833,PF3D7_1354400,XP_001350256.1,Q8IDF7,PPM
0.00191587	0	0	NaN	Pf3D7_05_v3	252047	252606	ID=PF3D7_0505800;Name=PF3D7_0505800;description=small+ubiquitin-related+modifier%2C+putative+%28SUMO%29;size=560;web_id=PF3D7_0505800;locus_tag=PF3D7_0505800;size=560;Alias=MAL5P1.58,PF3D7_0505800,chaperone,PFE0285c,complex_ubiquitin_ligase,XP_001351616.1,Q8I444,PFE0285c,SCF,proteasome_new,SUMOylation,SUMO,CAD51423.1,23504543,124506037,812904
0.00195746	0	0	NaN	Pf3D7_13_v3	2009477	2010281	ID=PF3D7_1350200;Name=PF3D7_1350200;description=small+nuclear+ribonucleoprotein+E%2C+putative+%28SNRPE%29;size=805;web_id=PF3D7_1350200;locus_tag=PF3D7_1350200;size=805;Alias=MAL13P1.253,XP_001350215.1,PF3D7_1350200,12368867,813814,23615632,splicing,MAL13P1.253,SNRPE,Q8IDJ7,CAD52624.1,124513718
0.00203725	0	0	NaN	Pf3D7_10_v3	1338124	1338818	ID=PF3D7_1033300;Name=PF3D7_1033300;description=conserved+Plasmodium+protein%2C+unknown+function;size=695;web_id=PF3D7_1033300;locus_tag=PF3D7_1033300;size=695;Alias=12368864,XP_001347608.1,124802829,PF3D7_1033300,PF10_0324,PF10_0324,23495191,810481,Q8IJ75,AAN35521.1
0.00203872	0	0	NaN	Pf3D7_09_v3	1135545	1136391	ID=PF3D7_0928000.1;Name=PF3D7_0928000.1;description=cytochrome+c+oxidase%2C+putative;size=847;web_id=PF3D7_0928000.1;locus_tag=PF3D7_0928000.1;size=847;Alias=PFI1375w,Q8I2M9,23505180,mitochondrionef,nuclearGenes,12368867,813555,PF3D7_0928000.1,PFI1375w,XP_001352150.1,124507107,CAD51961.1,BiogenesisCytochromeOxidase
0.00203872	0	0	NaN	Pf3D7_09_v3	1135545	1136391	ID=PF3D7_0928000.2;Name=PF3D7_0928000.2;description=cytochrome+c+oxidase%2C+putative;size=847;web_id=PF3D7_0928000.2;locus_tag=PF3D7_0928000.2;size=847;Alias=PF3D7_0928000.2
0.0020752	0	0	NaN	Pf3D7_14_v3	891991	893049	ID=PF3D7_1422000;Name=PF3D7_1422000;description=conserved+Plasmodium+protein%2C+unknown+function;size=1059;web_id=PF3D7_1422000;locus_tag=PF3D7_1422000;size=1059;Alias=XP_002585455.1,PF14_0787,8445043,C6S3H9,ACU12403.1,258549192,255528802,PF3D7_1422000,12368864,PF14_0787
0.00221985	0	0	NaN	Pf3D7_03_v3	369925	370789	ID=PF3D7_0308500;Name=PF3D7_0308500;description=activator+of+Hsp90+ATPase%2C+putative;size=865;web_id=PF3D7_0308500;locus_tag=PF3D7_0308500;size=865;Alias=814401,O97256,10448855,12368867,15383895,51968323,PFC0360w,chapfold,124504833,MAL3P3.21,BAD42863.1,CAB39022.2,PF3D7_0308500,Pf_chaperones,XP_001351159.1,PFC0360w
0.00227744	0	0	NaN	Pf3D7_13_v3	968110	968798	ID=PF3D7_1323200;Name=PF3D7_1323200;description=vacuolar+ATP+synthase+subunit+g%2C+putative;size=689;web_id=PF3D7_1323200;locus_tag=PF3D7_1323200;size=689;Alias=814101,PF3D7_1323200,Q8IE84,CAD52380.1,PF13_0130,23615389,12368867,124513232,ERGolgiVacuole,transporters,XP_001349972.1,PPM,PF13_0130
0.00236437	0	0	NaN	Pf3D7_14_v3	611865	612736	ID=PF3D7_1415200;Name=PF3D7_1415200;description=DNA-directed+RNA+polymerase+I%2FIII+subunit%2C+putative;size=872;web_id=PF3D7_1415200;locus_tag=PF3D7_1415200;size=872;Alias=PF3D7_1415200,RNApolyStruct,811731,12368864,AAN36762.1,124808476,Q8ILU4,PF14_0150,RNApolyI,PF14_0150,XP_001348323.1,23497215
0.00240402	0	0	NaN	PFC10_API_IRAB	27971	28058	ID=PFC10_API0050:tRNA;Name=PFC10_API0050%3AtRNA;description=unspecified+product;size=88;web_id=PFC10_API0050:tRNA;locus_tag=PFC10_API0050:tRNA;size=88;Alias=PFC10_API0050:tRNA,gen_apic_genom,PFC10_API0050:tRNA
0.00245012	0	0	NaN	Pf3D7_10_v3	417705	419318	ID=PF3D7_1010500;Name=PF3D7_1010500;description=ankyrin-repeat+protein%2C+putative;size=1614;web_id=PF3D7_1010500;locus_tag=PF3D7_1010500;size=1614;Alias=AAN35300.2,XP_001347387.2,810260,Q8IJU0,254922400,258597009,PF10_0102,chromatin,PF3D7_1010500,12368864,PF10_0102
0.00249079	0	0	NaN	Pf3D7_13_v3	1324012	1324802	ID=PF3D7_1331800;Name=PF3D7_1331800;description=60S+ribosomal+protein+L23%2C+putative;size=791;web_id=PF3D7_1331800;locus_tag=PF3D7_1331800;size=791;Alias=23615467,PF13_0171,ribosomeStruct,814141,CAD52458.1,PF3D7_1331800,PF13_0171,Q8IE09,XP_001350050.1,124513388
0.00254301	0	0	NaN	Pf3D7_13_v3	553752	554251	ID=PF3D7_1313000;Name=PF3D7_1313000;description=ubiquitin-like+protein+nedd8+homologue%2C+putative+%28Nedd8%29;size=500;web_id=PF3D7_1313000;locus_tag=PF3D7_1313000;size=500;Alias=124513020,XP_001349866.1,CAD52273.1,Nedd8,23615283,SCF,MAL13P1.64,12368867,MAL13P1.64,Q8IEI4,813953,PF3D7_1313000
0.00257883	0	0	NaN	Pf3D7_11_v3	239687	240613	ID=PF3D7_1105500;Name=PF3D7_1105500;description=centrin-4+%28CEN4%29;size=927;web_id=PF3D7_1105500;locus_tag=PF3D7_1105500;size=927;Alias=CEN4,mitoticCentro,Q8I714,XP_001347742.2,810618,258597203,PF3D7_1105500,PF11_0066,Centriole,254832594,PF11_0066,AAN35655.2
0.00268567	0	0	NaN	Pf3D7_10_v3	286522	287473	ID=PF3D7_1007100;Name=PF3D7_1007100;description=conserved+Plasmodium+protein%2C+unknown+function;size=952;web_id=PF3D7_1007100;locus_tag=PF3D7_1007100;size=952;Alias=12368864,PF3D7_1007100,C6S3C4,ACT83889.1,8444963,PF10_0070a,PF10_0070a,254922388,XP_002585401.1,258549055
0.00287223	0	0	NaN	Pf3D7_11_v3	981945	983086	ID=PF3D7_1124900;Name=PF3D7_1124900;description=60S+ribosomal+protein+L35%2C+putative;size=1142;web_id=PF3D7_1124900;locus_tag=PF3D7_1124900;size=1142;Alias=12368867,5262956,Q8IIB4,CAA82284.2,ribosomeStruct,XP_001347931.2,254832656,12368864,PF11_0260,AAN35844.2,PF3D7_1124900,PF11_0260,258597310,810807
0.00289225	0	0	NaN	Pf3D7_05_v3	1292211	1292409	ID=PF3D7_0531900;Name=PF3D7_0531900;description=unspecified+product;size=199;web_id=PF3D7_0531900;locus_tag=PF3D7_0531900;size=199;Alias=MAL5_ITS2:rRNA,MAL5_ITS2:rRNA,PF3D7_0531900
0.00296083	0	0	NaN	Pf3D7_05_v3	140710	141471	ID=PF3D7_0503400;Name=PF3D7_0503400;description=actin-depolymerizing+factor+1+%28ADF1%29;size=762;web_id=PF3D7_0503400;locus_tag=PF3D7_0503400;size=762;Alias=PF3D7_0503400,239977082,21628589,MAL5P1.34,124505989,XP_001351592.1,ADF1,Q8I467.1,PFE0165w,actin,812927,P86292.1,12368867,PFE0165w,74862538,Q8I467,CAD51399.1,23504519
0.00301075	0	0	NaN	PFC10_API_IRAB	27695	27770	ID=PFC10_API0047:tRNA;Name=PFC10_API0047%3AtRNA;description=unspecified+product;size=76;web_id=PFC10_API0047:tRNA;locus_tag=PFC10_API0047:tRNA;size=76;Alias=PFC10_API0047:tRNA,PFC10_API0047:tRNA,gen_apic_genom
0.00316347	0	0	NaN	Pf3D7_08_v3	1275625	1278795	ID=PF3D7_0829900;Name=PF3D7_0829900;description=unspecified+product;size=3171;web_id=PF3D7_0829900;locus_tag=PF3D7_0829900;size=3171;Alias=PF08TR005:ncRNA,PF3D7_0829900
0.00330289	0	0	NaN	Pf3D7_14_v3	2055791	2056437	ID=PF3D7_1450200;Name=PF3D7_1450200;description=conserved+Plasmodium+protein%2C+unknown+function;size=647;web_id=PF3D7_1450200;locus_tag=PF3D7_1450200;size=647;Alias=255528877,XP_002585468.1,PF14_0477a,C6S3J2,PF14_0477a,PF3D7_1450200,12368864,8444958,258549218,ACU12416.1
0.00346468	0	0	NaN	Pf3D7_02_v3	412275	412859	ID=PF3D7_0210100.1;Name=PF3D7_0210100.1;description=60S+ribosomal+protein+L37ae%2C+putative;size=585;web_id=PF3D7_0210100.1;locus_tag=PF3D7_0210100.1;size=585;Alias=812691,O96184,3845189,6225908,9804551,12368864,12368867,O96184.1,PFB0455w,124801126,PF02_0095,AAC71880.1,XP_001349609.1,PFB0455w,ribosomeStruct,PF3D7_0210100.1
0.00346468	0	0	NaN	Pf3D7_02_v3	412275	412859	ID=PF3D7_0210100.2;Name=PF3D7_0210100.2;description=60S+ribosomal+protein+L37ae%2C+putative;size=585;web_id=PF3D7_0210100.2;locus_tag=PF3D7_0210100.2;size=585;Alias=PF3D7_0210100.2
0.00358276	0	0	NaN	Pf3D7_05_v3	675809	676614	ID=PF3D7_0516200;Name=PF3D7_0516200;description=40S+ribosomal+protein+S14%2C+putative;size=806;web_id=PF3D7_0516200;locus_tag=PF3D7_0516200;size=806;Alias=ribosomeStruct,124506243,23504648,12368867,MAL5P1.162,812977,CAD51526.1,XP_001351719.1,PFE0810c,PF3D7_0516200,PFE0810c,Q8I3U6
0.00363383	0	0	NaN	Pf3D7_12_v3	214834	215695	ID=PF3D7_1204700;Name=PF3D7_1204700;description=conserved+Plasmodium+protein%2C+unknown+function;size=862;web_id=PF3D7_1204700;locus_tag=PF3D7_1204700;size=862;Alias=XP_001350456.1,PFL0235w,124805495,PF3D7_1204700,811100,PFL0235w,23496578,Q8I5Z8,AAN36136.1,2277.t00048,MAL12P1.47,12368864
0.00417099	0	0	NaN	Pf3D7_01_v3	393216	393490	ID=PF3D7_0110300;Name=PF3D7_0110300;description=Plasmodium+RNA+of+unknown+function+RUF5;size=275;web_id=PF3D7_0110300;locus_tag=PF3D7_0110300;size=275;Alias=PFA0504c.1,PF3D7_0110300
0.00419604	0	0	NaN	Pf3D7_12_v3	1745285	1745422	ID=PF3D7_1241000;Name=PF3D7_1241000;description=unspecified+product;size=138;web_id=PF3D7_1241000;locus_tag=PF3D7_1241000;size=138;Alias=PF3D7_1241000,PF3D7_07_RUF6_15.1,RF01581
0.0048466	0	0	NaN	Pf3D7_11_v3	395252	395336	ID=PF3D7_1109800;Name=PF3D7_1109800;description=unspecified+product;size=85;web_id=PF3D7_1109800;locus_tag=PF3D7_1109800;size=85;Alias=PF11_0544.1,PF3D7_1109800
0.0049874	0	0	NaN	Pf3D7_11_v3	1920268	1920811	ID=PF3D7_1148200;Name=PF3D7_1148200;description=unspecified+product;size=544;web_id=PF3D7_1148200;locus_tag=PF3D7_1148200;size=544;Alias=PF11TR012:ncRNA,PF3D7_1148200
0.00507026	0	0	NaN	Pf3D7_13_v3	2794237	2794851	ID=PF3D7_1370500;Name=PF3D7_1370500;description=unspecified+product;size=615;web_id=PF3D7_1370500;locus_tag=PF3D7_1370500;size=615;Alias=PF3D7_1370500,PF13TR008:ncRNA
0.00625932	0	0	NaN	Pf3D7_04_v3	979914	980051	ID=PF3D7_0421400;Name=PF3D7_0421400;description=unspecified+product;size=138;web_id=PF3D7_0421400;locus_tag=PF3D7_0421400;size=138;Alias=RF01581,PF3D7_0421400,PF3D7_04_RUF6_11.1
0.00688642	0	0	NaN	Pf3D7_05_v3	1288559	1289308	ID=PF3D7_0531500;Name=PF3D7_0531500;description=unspecified+product;size=750;web_id=PF3D7_0531500;locus_tag=PF3D7_0531500;size=750;Alias=PF3D7_0531500,PF05TR005:ncRNA
0.00745994	0	0	NaN	Pf3D7_07_v3	1085848	1086212	ID=PF3D7_0725700;Name=PF3D7_0725700;description=unspecified+product;size=365;web_id=PF3D7_0725700;locus_tag=PF3D7_0725700;size=365;Alias=MAL7_ITS1:rRNA,MAL7_ITS1:rRNA,PF3D7_0725700
0.00834806	0	0	NaN	Pf3D7_07_v3	508474	508609	ID=PF3D7_0711600;Name=PF3D7_0711600;description=unspecified+product;size=136;web_id=PF3D7_0711600;locus_tag=PF3D7_0711600;size=136;Alias=PF3D7_07_RUF6_1.1,PF3D7_0711600
0.00991908	0	0	NaN	Pf3D7_12_v3	1731821	1731955	ID=PF3D7_1240800;Name=PF3D7_1240800;description=Plasmodium+RNA+of+unknown+function+RUF6-14;size=135;web_id=PF3D7_1240800;locus_tag=PF3D7_1240800;size=135;Alias=PF3D7_1240800,PF3D7_07_RUF_6_14.1,RF01581
0.0108217	0	0	NaN	Pf3D7_04_v3	557457	557609	ID=PF3D7_0412500;Name=PF3D7_0412500;description=Plasmodium+RNA+of+unkown+function+RUF6-3;size=153;web_id=PF3D7_0412500;locus_tag=PF3D7_0412500;size=153;Alias=RF01581,RNAzID:3120,PF3D7_0412500,PFD0616w:ncRNA
0.0125032	0	0	NaN	Pf3D7_07_v3	577945	578078	ID=PF3D7_0712700;Name=PF3D7_0712700;description=unspecified+product;size=134;web_id=PF3D7_0712700;locus_tag=PF3D7_0712700;size=134;Alias=PF3D7_07_RUF_6_13.1,RF01581,PF3D7_0712700
0.0134996	0	0	NaN	Pf3D7_12_v3	1715841	1715980	ID=PF3D7_1240500;Name=PF3D7_1240500;description=unspecified+product;size=140;web_id=PF3D7_1240500;locus_tag=PF3D7_1240500;size=140;Alias=PF3D7_1240500,RF01581,PF3D7_12_RUF6_5.1
0.0143936	0	0	NaN	Pf3D7_07_v3	523147	523288	ID=PF3D7_0711800;Name=PF3D7_0711800;description=unspecified+product;size=142;web_id=PF3D7_0711800;locus_tag=PF3D7_0711800;size=142;Alias=RF01581,PF3D7_0711800,PF3D_07_RUF6_2.1
0.0175411	0	0	NaN	Pf3D7_05_v3	1291693	1292051	ID=PF3D7_0531700;Name=PF3D7_0531700;description=unspecified+product;size=359;web_id=PF3D7_0531700;locus_tag=PF3D7_0531700;size=359;Alias=PF3D7_0531700,MAL5_ITS1:rRNA,MAL5_ITS1:rRNA
0.0181312	0	0	NaN	Pf3D7_08_v3	456050	456155	ID=PF3D7_0809000;Name=PF3D7_0809000;description=Plasmodium+RNA+of+unkown+function+RUF6-10;size=106;web_id=PF3D7_0809000;locus_tag=PF3D7_0809000;size=106;Alias=PF3D7_0809000,PF3D7_new_RUF6_10.1
0.0187902	0	0	NaN	Pf3D7_07_v3	538519	538660	ID=PF3D7_0712100;Name=PF3D7_0712100;description=unspecified+product;size=142;web_id=PF3D7_0712100;locus_tag=PF3D7_0712100;size=142;Alias=PF3D7_07_RUF6_12.1,RF01581,PF3D7_0712100
0.000586075	0	0.000304044	0	Pf3D7_11_v3	1431881	1435170	ID=PF3D7_1136500.1;Name=PF3D7_1136500.1;description=casein+kinase+1+%28CK1%29;size=3290;web_id=PF3D7_1136500.1;locus_tag=PF3D7_1136500.1;size=3290;Alias=Q8IHZ9.1,51316177,810923,calmodulin,491593,CK1,AAN35960.1,centrosome,C6S3F7,PF3D7_1136500.1,PF11_0377,40S_assemb_path,Protein_kinases,23496302
0.000586075	0	0.000304044	0	Pf3D7_11_v3	1431881	1435170	ID=PF3D7_1136500.2;Name=PF3D7_1136500.2;description=casein+kinase+1;size=3290;web_id=PF3D7_1136500.2;locus_tag=PF3D7_1136500.2;size=3290;Alias=ACT82980.1,254832688,PF11_0377,254832689,258549130,PF3D7_1136500.2,XP_002585436.1,ACT82979.1
0.000208986	0	0.000359324	0	Pf3D7_12_v3	521687	524470	ID=PF3D7_1211700;Name=PF3D7_1211700;description=minchromosome+maintenance+%28MCM%29+complex+subunit%2C+putative+%28MCM5%29;size=2784;web_id=PF3D7_1211700;locus_tag=PF3D7_1211700;size=2784;Alias=2277.t00117,Q8I5T4,XP_001350525.1,MAL12P1.116,PFL0580w,hist_chap,10872463,PF3D7_1211700,AAN36205.1,11559516,12368864,PFL0580w,MCM5,AAG37993.1,124805740,replicationForm,811169,23496649,12368867
0.000470822	0	0.000379939	0	Pf3D7_13_v3	1902723	1905355	ID=PF3D7_1347600;Name=PF3D7_1347600;description=conserved+Plasmodium+protein%2C+unknown+function;size=2633;web_id=PF3D7_1347600;locus_tag=PF3D7_1347600;size=2633;Alias=MAL13P1.237a,C0H5H7,MAL13P1.237a,PF3D7_1347600,XP_002809074.1,9221981,296005508,CAX64355.1,225632018
0.000922348	0	0.000399202	0	Pf3D7_14_v3	2247245	2249750	ID=PF3D7_1455000;Name=PF3D7_1455000;description=protein+phosphatase%2C+putative;size=2506;web_id=PF3D7_1455000;locus_tag=PF3D7_1455000;size=2506;Alias=XP_001348697.2,PF3D7_1455000,12368867,Phos_tmd_exprs,812105,258597862,255528890,PF14_0523,Q8IKS9,12368864,PF14_0523,phosphorylation,AAN37136.2
0.00156306	0	0.000410678	0	Pf3D7_11_v3	542330	544765	ID=PF3D7_1114200;Name=PF3D7_1114200;description=GTPase+activator%2C+putative;size=2436;web_id=PF3D7_1114200;locus_tag=PF3D7_1114200;size=2436;Alias=810699,rabCycle,PF3D7_1114200,258597249,PF11_0151,PF11_0152,12368864,Q8IIL9,AAN35736.2,254832623,PF11_0152,XP_001347823.2
0.000562502	0	0.000419463	0	Pf3D7_08_v3	575986	578370	ID=PF3D7_0811400;Name=PF3D7_0811400;description=conserved+Plasmodium+protein%2C+unknown+function;size=2385;web_id=PF3D7_0811400;locus_tag=PF3D7_0811400;size=2385;Alias=2655221,CAX64116.1,225632234,MAL8P1.103,296004997,PF3D7_0811400,MAL8P1.103,C0H4U0,XP_002808839.1
0.00178744	0	0.000423908	0	Pf3D7_09_v3	905998	908357	ID=PF3D7_0922300;Name=PF3D7_0922300;description=conserved+Plasmodium+protein%2C+unknown+function;size=2360;web_id=PF3D7_0922300;locus_tag=PF3D7_0922300;size=2360;Alias=CAX64227.1,PF3D7_0922300,813499,12368867,C0H550,PFI1095w,PFI1095w,XP_002808946.1,225631832,296005229
0.00104039	0	0.000430108	0	Pf3D7_06_v3	1078995	1081320	ID=PF3D7_0626800;Name=PF3D7_0626800;description=pyruvate+kinase+%28PyrK%29;size=2326;web_id=PF3D7_0626800;locus_tag=PF3D7_0626800;size=2326;Alias=PyrK,12368867,PF3D7_0626800,MCprot,46361220,3885761,PFF1300w,glycolysispath,C6KTA4,2270.t00155,XP_966251.1,86171639,PFF1300w,MAL6P1.160,660890,redoxReg,CAG25081.1
0.000235707	0	0.000437254	0	Pf3D7_10_v3	1302594	1304881	ID=PF3D7_1032400;Name=PF3D7_1032400;description=N-acetylglucosaminyl-phosphatidylinositol+biosynthetic+protein%2C+putative;size=2288;web_id=PF3D7_1032400;locus_tag=PF3D7_1032400;size=2288;Alias=XP_001347600.2,AAN35513.2,12368867,12368864,PF10_0316,258597145,PF3D7_1032400,254922483,810473,Q8IJ83,PF10_0316,gpiAnchor1path
0.000220775	0	0.000449438	0	Pf3D7_14_v3	1924425	1926650	ID=PF3D7_1446900;Name=PF3D7_1446900;description=glutaminyl-peptide+cyclotransferase%2C+putative;size=2226;web_id=PF3D7_1446900;locus_tag=PF3D7_1446900;size=2226;Alias=812029,glutamatemetpath,PF14_0447,Q8IL03,12368864,PF3D7_1446900,11738814,PF14_0447
0.0016422	0	0.000454339	0	Pf3D7_14_v3	955865	958066	ID=PF3D7_1423600;Name=PF3D7_1423600;description=serine%2Fthreonine+protein+kinase%2C+putative;size=2202;web_id=PF3D7_1423600;locus_tag=PF3D7_1423600;size=2202;Alias=12368867,12368864,PF3D7_1423600,PF14_0227,PF14_0227,Q8ILL6,811809,XP_001348401.2,AAN36840.2,Protein_kinases,calmodulin,258597716,255528807
0.00110384	0	0.000455789	0	Pf3D7_01_v3	169079	171273	ID=PF3D7_0103800;Name=PF3D7_0103800;description=actin-related+protein+%28ARP1%29;size=2195;web_id=PF3D7_0103800;locus_tag=PF3D7_0103800;size=2195;Alias=ARP1,actin,23510613,PFA0190c,124505713,MAL1P1.24,CAD48998.1,centrosome,PF3D7_0103800,XP_001350970.1,PFA0190c
0.000615798	0	0.000460829	0	Pf3D7_11_v3	714117	716287	ID=PF3D7_1118800;Name=PF3D7_1118800;description=conserved+Plasmodium+protein%2C+unknown+function;size=2171;web_id=PF3D7_1118800;locus_tag=PF3D7_1118800;size=2171;Alias=124803981,XP_001347866.1,23496118,12368864,Q8IIH9,PF3D7_1118800,810742,PF11_0195,PF11_0195,AAN35779.1
0.000523032	0	0.000464253	0	Pf3D7_08_v3	948745	950899	ID=PF3D7_0821000;Name=PF3D7_0821000;description=conserved+Plasmodium+protein%2C+unknown+function;size=2155;web_id=PF3D7_0821000;locus_tag=PF3D7_0821000;size=2155;Alias=MAL8P1.53,Q8IB44,PF3D7_0821000,124512364,23499084,2655352,XP_001349315.1,CAD51164.1,MAL8P1.53
0.000873965	0	0.000496524	0	Pf3D7_04_v3	303329	305343	ID=PF3D7_0405600;Name=PF3D7_0405600;description=conserved+Plasmodium+membrane+protein%2C+unknown+function;size=2015;web_id=PF3D7_0405600;locus_tag=PF3D7_0405600;size=2015;Alias=812422,Q8I1X3,12368867,PFD0270w,PFD0275w,PFD0280w,225631623,296004394,MAL4P1.54,CAD49148.2,PF3D7_0405600,XP_001351368.2,PFD0275w
0.00270886	0	0.000519481	0	Pf3D7_05_v3	206450	208375	ID=PF3D7_0504900;Name=PF3D7_0504900;description=conserved+Plasmodium+protein%2C+unknown+function;size=1926;web_id=PF3D7_0504900;locus_tag=PF3D7_0504900;size=1926;Alias=PF3D7_0504900,PFE0240w,C0H4C5,XP_002808676.1,12368867,PFE0240w,MAL5P1.49,296004510,225631661,812913,CAX63947.1
0.000271279	0	0.000522739	0	Pf3D7_09_v3	1361935	1363848	ID=PF3D7_0934800;Name=PF3D7_0934800;description=cAMP-dependent+protein+kinase+catalytic+subunit+%28PKAc%29;size=1914;web_id=PF3D7_0934800;locus_tag=PF3D7_0934800;size=1914;Alias=813617,U78291,centrosome,PF3D7_0934800,124507233,23505243,AAB70118.1,PFI1685w,CAD52023.1,Q7K6A0,PKAc,9801897,2393773,9864210,PFI1685w,Protein_kinases,AAF99562.1,AAG01351.1,XP_001352213.1
1.92401e-05	0	0.000524384	0	Pf3D7_10_v3	253704	255611	ID=PF3D7_1005900;Name=PF3D7_1005900;description=conserved+Plasmodium+protein%2C+unknown+function;size=1908;web_id=PF3D7_1005900;locus_tag=PF3D7_1005900;size=1908;Alias=11738814,Q8IJY1,XP_001347345.1,PF10_0060,PF3D7_1005900,PF10_0060,124802042,23494924,12368864,AAN35258.1,810218
0.00121201	0	0.000535117	0	Pf3D7_10_v3	787745	795220	ID=PF3D7_1019500.1;Name=PF3D7_1019500.1;description=conserved+Plasmodium+membrane+protein%2C+unknown+function;size=7476;web_id=PF3D7_1019500.1;locus_tag=PF3D7_1019500.1;size=7476;Alias=PF10_0188,PF10_0188,PF3D7_1019500.1,12368864,Q8IJK7,810346
0.00121201	0	0.000535117	0	Pf3D7_10_v3	787745	795220	ID=PF3D7_1019500.2;Name=PF3D7_1019500.2;description=conserved+Plasmodium+membrane+protein%2C+unknown+function;size=7476;web_id=PF3D7_1019500.2;locus_tag=PF3D7_1019500.2;size=7476;Alias=PF3D7_1019500.2
0.000534197	0	0.000541126	0	Pf3D7_05_v3	588921	590769	ID=PF3D7_0514000;Name=PF3D7_0514000;description=tubulin-tyrosine+ligase%2C+putative+%28TTL%29;size=1849;web_id=PF3D7_0514000;locus_tag=PF3D7_0514000;size=1849;Alias=812955,PF3D7_0514000,PFE0700c,CAX63960.1,TTL,225631674,C0H4D8,296004536,XP_002808689.1,MAL5P1.141,tubulin,PFE0700c
8.22623e-05	0	0.000544959	0	Pf3D7_05_v3	233815	235650	ID=PF3D7_0505300;Name=PF3D7_0505300;description=UDP-N-acetyl+glucosamine%3AUMP+antiporter;size=1836;web_id=PF3D7_0505300;locus_tag=PF3D7_0505300;size=1836;Alias=XP_001351611.1,23504538,PFE0260w,PFE0260w,124506027,CAD51418.1,12368867,812911,ERGolgiVacuole,transporters,PF3D7_0505300,Q8I449,MAL5P1.53
0.00120955	0	0.000559128	0	Pf3D7_06_v3	306384	309961	ID=PF3D7_0607400;Name=PF3D7_0607400;description=G-protein+associated+signal+transduction+protein%2C+putative;size=3578;web_id=PF3D7_0607400;locus_tag=PF3D7_0607400;size=3578;Alias=PFF0365c,12368867,XP_966064.2,PF3D7_0607400,PFF0365c,C6KSS2,3885903,296004632,er_golgi_tr_qa,225631722,MAL6P1.77,2270.t00240,CAG25244.2
0.000632357	0	0.000576369	0	Pf3D7_09_v3	1167842	1169577	ID=PF3D7_0929200;Name=PF3D7_0929200;description=RNA+binding+protein%2C+putative;size=1736;web_id=PF3D7_0929200;locus_tag=PF3D7_0929200;size=1736;Alias=CAX64247.1,PFI1435w,225631852,813567,C0H570,PF3D7_0929200,XP_002808966.1,PFI1435w,12368867,296005269
0.00372824	0	0.000580383	0	Pf3D7_05_v3	1183916	1185639	ID=PF3D7_0528900;Name=PF3D7_0528900;description=conserved+Plasmodium+protein%2C+unknown+function;size=1724;web_id=PF3D7_0528900;locus_tag=PF3D7_0528900;size=1724;Alias=PFE1440c,MAL5P1.286,PF3D7_0528900,CAX63988.1,PFE1440c,296004606,C0H4G6,12368867,XP_002808717.1,9221859,225631709
0.000832764	0	0.00058072	0	Pf3D7_07_v3	841108	842830	ID=PF3D7_0719200;Name=PF3D7_0719200;description=NIMA+related+kinase+4+%28NEK4%29;size=1723;web_id=PF3D7_0719200;locus_tag=PF3D7_0719200;size=1723;Alias=phosphorylation,PF3D7_0719200,NEK4,C0H4N8,2654953,225632171,MAL7P1.100,XP_002808785.1,296004870,MAL7P1.100,Protein_kinases,CAX64058.1
0.000639821	0	0.000607533	0	Pf3D7_13_v3	1272213	1273859	ID=PF3D7_1330000.1;Name=PF3D7_1330000.1;description=thioredoxin%2C+putative;size=1647;web_id=PF3D7_1330000.1;locus_tag=PF3D7_1330000.1;size=1647;Alias=CAD52441.1,redoxmetpath,813711,thioredoxinpath,PF3D7_1330000.1,23615450,XP_001350033.1,Pfal004233AAA,MAL13P1.159,Q8IE26,124513354,MAL13P1.159
0.000639821	0	0.000607533	0	Pf3D7_13_v3	1272213	1273859	ID=PF3D7_1330000.2;Name=PF3D7_1330000.2;description=thioredoxin%2C+putative;size=1647;web_id=PF3D7_1330000.2;locus_tag=PF3D7_1330000.2;size=1647;Alias=PF3D7_1330000.2
0.00117884	0	0.000608643	0	Pf3D7_12_v3	445625	447268	ID=PF3D7_1209700;Name=PF3D7_1209700;description=conserved+Plasmodium+protein%2C+unknown+function;size=1644;web_id=PF3D7_1209700;locus_tag=PF3D7_1209700;size=1644;Alias=PFL0485w,PF3D7_1209700,2277.t00098,23496629,12368864,AAN36186.1,811150,PFL0485w,MAL12P1.97,124805672,XP_001350506.1,Q8I5V2
0.000227074	0	0.000617665	0	Pf3D7_14_v3	516574	518193	ID=PF3D7_1412800;Name=PF3D7_1412800;description=N-myristoyltransferase+%28NMT%29;size=1620;web_id=PF3D7_1412800;locus_tag=PF3D7_1412800;size=1620;Alias=PF3D7_1412800,Q8ILW6.1,AAN36739.1,prenylation,Pfal006784AAA,PF14_0127,NMT,AAF18461.1,XP_001348300.1,Q8ILW6,23497192,75016053,6581106,811708,12368864,124808392,PF14_0127
2.28319e-05	0	0.000622278	0	Pf3D7_03_v3	845713	847320	ID=PF3D7_0320300;Name=PF3D7_0320300;description=T-complex+protein+1+epsilon+subunit%2C+putative;size=1608;web_id=PF3D7_0320300;locus_tag=PF3D7_0320300;size=1608;Alias=814517,O97282,4493969,10448855,12368867,MAL3P7.9,PFC0900w,chapfold,124505063,CAB39028.1,centrosome,PF3D7_0320300,Pf_chaperones,XP_001351273.1,PFC0900w
0.000319747	0	0.000625391	0	Pf3D7_05_v3	337426	339025	ID=PF3D7_0508200;Name=PF3D7_0508200;description=longevity-assurance+%28LAG1%29+domain+protein%2C+putative;size=1600;web_id=PF3D7_0508200;locus_tag=PF3D7_0508200;size=1600;Alias=XP_002808683.1,12368867,PF3D7_0508200,CAX63954.1,PFE0405c,812864,sphingometpath,PFE0405c,296004524,225631668,C0H4D2,11738814,MAL5P1.83
4.54815e-05	0	0.000631712	0	Pf3D7_13_v3	481499	483082	ID=PF3D7_1311200;Name=PF3D7_1311200;description=conserved+Plasmodium+protein%2C+unknown+function;size=1584;web_id=PF3D7_1311200;locus_tag=PF3D7_1311200;size=1584;Alias=PF3D7_1311200,Q8IEK5,124512968,MAL13P1.54,23615257,CAD52247.1,MAL13P1.54,813943,XP_001349840.1
0.00129792	0	0.000640205	0	Pf3D7_07_v3	887816	889378	ID=PF3D7_0720600;Name=PF3D7_0720600;description=conserved+Plasmodium+protein%2C+unknown+function;size=1563;web_id=PF3D7_0720600;locus_tag=PF3D7_0720600;size=1563;Alias=PF3D7_0720600,MAL7P1.107,CAD50953.1,2655190,23498875,Q8IBP6,124511948,XP_001349107.1,MAL7P1.107
0.000493777	0	0.000641437	0	Pf3D7_07_v3	954784	956343	ID=PF3D7_0722400;Name=PF3D7_0722400;description=GTP+binding+protein%2C+putative;size=1560;web_id=PF3D7_0722400;locus_tag=PF3D7_0722400;size=1560;Alias=2655188,MAL7P1.122,23498893,12368867,organizKinetochore,Q8IBM9,redoxReg,XP_001349125.1,MAL7P1.122,CAD50971.1,import_export,PF3D7_0722400,124511984
0.000193543	0	0.000645995	0	Pf3D7_14_v3	2825370	2826918	ID=PF3D7_1468700;Name=PF3D7_1468700;description=eukaryotic+initiation+factor+4A+%28eIF4A%29;size=1549;web_id=PF3D7_1468700;locus_tag=PF3D7_1468700;size=1549;Alias=AAN37268.1,splicing,XP_001348829.1,PF14_0655,112434012,83272531,812237,ABI18354.1,redoxReg,Q8IKF0,intTranslation,23497730,PF3D7_1468700,ABC00776.1,eIF4A,124810293,PF14_0655
0.000360721	0	0.000645995	0	Pf3D7_11_v3	1372311	1373859	ID=PF3D7_1135000.1;Name=PF3D7_1135000.1;description=conserved+Plasmodium+protein%2C+unknown+function;size=1549;web_id=PF3D7_1135000.1;locus_tag=PF3D7_1135000.1;size=1549;Alias=XP_001348032.2,PF3D7_1135000.1,Q8II14,12368864,258597357,810908,254832681,PF11_0361,C6S3F5,AAN35945.2,C6S3F4
0.000360721	0	0.000645995	0	Pf3D7_11_v3	1372311	1373859	ID=PF3D7_1135000.2;Name=PF3D7_1135000.2;description=conserved+Plasmodium+protein%2C+unknown+function;size=1549;web_id=PF3D7_1135000.2;locus_tag=PF3D7_1135000.2;size=1549;Alias=ACT82977.1,258549126,PF3D7_1135000.2,XP_002585434.1,254832683
0.000360721	0	0.000645995	0	Pf3D7_11_v3	1372311	1373859	ID=PF3D7_1135000.3;Name=PF3D7_1135000.3;description=conserved+Plasmodium+protein%2C+unknown+function;size=1549;web_id=PF3D7_1135000.3;locus_tag=PF3D7_1135000.3;size=1549;Alias=ACT82976.1,258549124,254832682,PF3D7_1135000.3,XP_002585433.1
0.000563635	0	0.000645995	0	Pf3D7_13_v3	1953304	1954852	ID=PF3D7_1348600;Name=PF3D7_1348600;description=conserved+Plasmodium+protein%2C+unknown+function;size=1549;web_id=PF3D7_1348600;locus_tag=PF3D7_1348600;size=1549;Alias=XP_001350199.1,PF3D7_1348600,CAD52608.1,124513686,PF13_0255,814220,Q8IDL3,PF13_0255,23615616
0.00282633	0	0.000655308	0	Pf3D7_06_v3	247640	249166	ID=PF3D7_0605900;Name=PF3D7_0605900;description=long+chain+polyunsaturated+fatty+acid+elongation+enzyme%2C+putative;size=1527;web_id=PF3D7_0605900;locus_tag=PF3D7_0605900;size=1527;Alias=XP_966049.1,PF3D7_0605900,C6KSQ7,PFF0290w,86170610,MAL6P1.62,2270.t00256,46362291,PFF0290w,facidsynthesispath,12368867,CAG25229.1,3885707
0.000581316	0	0.000662691	0	Pf3D7_13_v3	2603463	2604972	ID=PF3D7_1364800;Name=PF3D7_1364800;description=DNA-directed+RNA+polymerase+2%2C+putative;size=1510;web_id=PF3D7_1364800;locus_tag=PF3D7_1364800;size=1510;Alias=PF13_0341,23615776,12368867,CAD52768.1,PF13_0341,Q8ID59,PF3D7_1364800,124514006,814300,RNApolyII,RNApolyStruct,XP_001350359.1
0.00103137	0	0.000666001	0	Pf3D7_13_v3	1138558	1141561	ID=PF3D7_1327100;Name=PF3D7_1327100;description=conserved+Plasmodium+protein%2C+unknown+function;size=3004;web_id=PF3D7_1327100;locus_tag=PF3D7_1327100;size=3004;Alias=CAX64322.1,PF3D7_1327100,225631983,MAL13P1.154,XP_002809041.1,296005438,813706,MAL13P1.154,C0H5E4
0.000485016	0	0.000677048	0	Pf3D7_12_v3	1276257	1277734	ID=PF3D7_1231100;Name=PF3D7_1231100;description=Rab+GTPase+2+%28RAB2%29;size=1478;web_id=PF3D7_1231100;locus_tag=PF3D7_1231100;size=1478;Alias=rabCycle,rabIntracellular,124806378,PFL1500w,23496833,AAN36386.1,MAL12P1.300,PF3D7_1231100,2277.t00300,PFL1500w,Q8I5A9,XP_001350706.1,811352,proteins,RAB2,er_golgi_tr_qa
0.000101142	0	0.000682594	0	Pf3D7_10_v3	468071	469536	ID=PF3D7_1012100;Name=PF3D7_1012100;description=conserved+Plasmodium+protein%2C+unknown+function;size=1466;web_id=PF3D7_1012100;locus_tag=PF3D7_1012100;size=1466;Alias=810276,124802212,12368864,PF10_0118,XP_001347403.1,Q8IJS4,23494982,PF10_0118,AAN35316.1,PF3D7_1012100
0.0014221	0	0.000687285	0	Pf3D7_02_v3	457130	458585	ID=PF3D7_0211300;Name=PF3D7_0211300;description=conserved+Plasmodium+protein%2C+unknown+function;size=1456;web_id=PF3D7_0211300;locus_tag=PF3D7_0211300;size=1456;Alias=812701,Q8I661,9804551,12368864,PFB0501c,254688470,258596897,PF02_0105,AAN37611.2,PF3D7_0211300,XP_001349619.2,PFB0501c
0.00230267	0	0.000691563	0	Pf3D7_12_v3	2095062	2096508	ID=PF3D7_1251300;Name=PF3D7_1251300;description=thymidylate+kinase+%28TMK%29;size=1447;web_id=PF3D7_1251300;locus_tag=PF3D7_1251300;size=1447;Alias=TMK,PFL2465c,2277.t00493,AAN36577.1,PF3D7_1251300,pyrimidinemetpath,23497027,811545,PFL2465c,XP_001350897.1,124807055,Q8I4S1,MAL12P1.490
0.00111299	0	0.000692521	0	Pf3D7_14_v3	2812941	2814385	ID=PF3D7_1468500;Name=PF3D7_1468500;description=derlin-1+%28Der1-1%29;size=1445;web_id=PF3D7_1468500;locus_tag=PF3D7_1468500;size=1445;Alias=ProteasomeMeditated,PF14_0653,AAN37266.2,PF3D7_1468500,258597917,PF14_0653,12368864,812235,255528924,Q8IKF2,Der1-1,XP_001348827.2,1396.t00122
0.0012721	0	0.000694444	0	Pf3D7_04_v3	479028	480468	ID=PF3D7_0410600;Name=PF3D7_0410600;description=conserved+Plasmodium+protein%2C+unknown+function;size=1441;web_id=PF3D7_0410600;locus_tag=PF3D7_0410600;size=1441;Alias=812381,Q9U0I2,8248756,12368867,PFD0525w,124505355,MAL4P2.40,CAB62881.2,PF3D7_0410600,XP_001351419.1,PFD0525w
5.00328e-05	0	0.000694927	0	Pf3D7_05_v3	857038	858477	ID=PF3D7_0520900;Name=PF3D7_0520900;description=S-adenosyl-L-homocysteine+hydrolase+%28SAHH%29;size=1440;web_id=PF3D7_0520900;locus_tag=PF3D7_0520900;size=1440;Alias=PF3D7_0520900,CAD51574.1,813025,P50250,Pfal008498AAA,12368867,56554255,P50250.2,PFE1050w,655905,1V8B,22087607,56554257,methioninemetpath,56554256,MAL5P1.210,AAM90981.1,124506339,56554258,XP_001351767.1,redoxReg,PFE1050w,SAHH,23504696…
0.000638693	0	0.000707214	0	Pf3D7_12_v3	1256690	1258104	ID=PF3D7_1230600;Name=PF3D7_1230600;description=sun-family+protein%2C+putative;size=1415;web_id=PF3D7_1230600;locus_tag=PF3D7_1230600;size=1415;Alias=riboMaturation,PFL1475w,12368864,AAN36381.1,Ribosomegenes,2277.t00295,811347,PFL1475w,Q8I5B4,12368867,MAL12P1.295,124806360,23496827,PF3D7_1230600,XP_001350701.1
0.00131163	0	0.00070922	0	Pf3D7_13_v3	1893613	1895023	ID=PF3D7_1347300;Name=PF3D7_1347300;description=conserved+Plasmodium+membrane+protein%2C+unknown+function;size=1411;web_id=PF3D7_1347300;locus_tag=PF3D7_1347300;size=1411;Alias=MAL13P1.235,813794,PF3D7_1347300,Q8IDM5,MAL13P1.235
0.000374449	0	0.000711238	0	Pf3D7_06_v3	220407	221813	ID=PF3D7_0605200;Name=PF3D7_0605200;description=conserved+Plasmodium+protein%2C+unknown+function;size=1407;web_id=PF3D7_0605200;locus_tag=PF3D7_0605200;size=1407;Alias=CAG25222.1,2270.t00338,3885714,86170576,PFF0255c,PF3D7_0605200,PFF0255c,XP_966042.1,12368867,MAL6P1.55,C6KSQ0,46362284
0.000363977	0	0.000711744	0	Pf3D7_14_v3	2577974	2579379	ID=PF3D7_1463500;Name=PF3D7_1463500;description=conserved+Plasmodium+protein%2C+unknown+function;size=1406;web_id=PF3D7_1463500;locus_tag=PF3D7_1463500;size=1406;Alias=PF14_0604,XP_001348778.1,Q8IKK1,PF3D7_1463500,PF14_0604,12368864,AAN37217.1,812186,23497678,124810144
0.000694064	0	0.000717875	0	Pf3D7_14_v3	2684141	2685534	ID=PF3D7_1465900;Name=PF3D7_1465900;description=40S+ribosomal+protein+S3%2C+putative;size=1394;web_id=PF3D7_1465900;locus_tag=PF3D7_1465900;size=1394;Alias=XP_001348801.1,124810210,23497701,12368864,12368867,AAN37240.1,812209,PF14_0627,ribosomeStruct,Q8IKH8,PF14_0627,PF3D7_1465900
0.000482221	0	0.000731529	0	Pf3D7_14_v3	433951	435318	ID=PF3D7_1410800;Name=PF3D7_1410800;description=ankyrin-repeat+protein%2C+putative;size=1368;web_id=PF3D7_1410800;locus_tag=PF3D7_1410800;size=1368;Alias=Q8ILY7,PF14_0106,23497170,PF14_0106,811687,124808292,PF3D7_1410800,12368864,XP_001348279.1,AAN36718.1
0.000254583	0	0.000745712	0	Pf3D7_14_v3	246380	247721	ID=PF3D7_1406800;Name=PF3D7_1406800;description=glideosome+associated+protein+with+multiple+membrane+spans+3+%28GAPM3%29;size=1342;web_id=PF3D7_1406800;locus_tag=PF3D7_1406800;size=1342;Alias=PF3D7_1406800,XP_001348238.1,PF14_0065,AAN36677.1,PF14_0065,124808130,12368864,811647,Q8IM26,GAPM3,linearMotor,23497128
0.00126266	0	0.000746269	0	Pf3D7_10_v3	1101818	1103158	ID=PF3D7_1026100;Name=PF3D7_1026100;description=conserved+Plasmodium+protein%2C+unknown+function;size=1341;web_id=PF3D7_1026100;locus_tag=PF3D7_1026100;size=1341;Alias=12368864,PF3D7_1026100,Q8IJE0,258597117,XP_001347542.2,254922464,AAN35455.2,PF10_0258,PF10_0258,810415
0.00112181	0	0.000746826	0	Pf3D7_08_v3	1068563	1069902	ID=PF3D7_0824600;Name=PF3D7_0824600;description=anamorsin+related+protein%2C+putative;size=1340;web_id=PF3D7_0824600;locus_tag=PF3D7_0824600;size=1340;Alias=XP_002808875.1,225632273,292630740,2655414,FeSProtein,296005078,MAL8P1.31,C0H4X5.1,CAX64153.1,C0H4X5,PF3D7_0824600,MAL8P1.31
0.000791102	0	0.000750188	0	Pf3D7_14_v3	2118947	2120280	ID=PF3D7_1451700;Name=PF3D7_1451700;description=protein+phosphatase+2b+regulatory+subunit%2C+putative;size=1334;web_id=PF3D7_1451700;locus_tag=PF3D7_1451700;size=1334;Alias=Q8IKV9,28195217,255528880,PF14_0492,AAN37105.2,258597843,12368867,PF3D7_1451700,12368864,Phos_tmd_exprs,AAO33818.1,812074,XP_001348666.2,PF14_0492
0.000632738	0	0.000758725	0	Pf3D7_12_v3	505344	506662	ID=PF3D7_1211400;Name=PF3D7_1211400;description=heat+shock+protein+DNAJ+homologue+Pfj4+%28PfJ4%29;size=1319;web_id=PF3D7_1211400;locus_tag=PF3D7_1211400;size=1319;Alias=AAN36202.1,Q9GUX2,11127603,12368867,BAB17689.1,XP_001350522.1,PfJ4,2277.t00114,124805729,23496646,MAL12P1.113,12368864,811166,PFL0565w,Q7KQK3,PFL0565w,Pf_chaperones,PF3D7_1211400
0.000781862	0	0.000758725	0	Pf3D7_12_v3	194144	195462	ID=PF3D7_1203900;Name=PF3D7_1203900;description=ubiquitin+conjugating+enzyme+E2%2C+putative+%28UBC%29;size=1319;web_id=PF3D7_1203900;locus_tag=PF3D7_1203900;size=1319;Alias=UBC,PFL0190w,XP_001350447.1,23496569,MAL12P1.38,SCF,12368864,chaperone,CAH75150.1,124805463,Pfal009014AAA,proteaUbiqpath,proteasome_new,PF3D7_1203900,PFL0190w,CCR4,Q8I607,70951940,2277.t00038,complex_ubiquitin_ligase,XP_745172…
0.00433224	0	0.000760167	0	Pf3D7_07_v3	738578	741209	ID=PF3D7_0717000;Name=PF3D7_0717000;description=conserved+Plasmodium+membrane+protein%2C+unknown+function;size=2632;web_id=PF3D7_0717000;locus_tag=PF3D7_0717000;size=2632;Alias=PF3D7_0717000,MAL7P1.82,2655046,C0H4N0,MAL7P1.82
0.00149835	0	0.000763359	0	Pf3D7_08_v3	992655	993965	ID=PF3D7_0822500;Name=PF3D7_0822500;description=dynein+light+chain+1+%28DLC1%29;size=1311;web_id=PF3D7_0822500;locus_tag=PF3D7_0822500;size=1311;Alias=XP_001349300.1,organizKinetochore,23499069,molecularMotor,Kinetochore,12368867,PF3D7_0822500,2655387,mitoticCentro,124512334,MAL8P1.46,CAD51149.1,centrosome,Q8IB59,MAL8P1.46,microtubuleDynam,DLC1
0.00134004	0	0.000771208	0	Pf3D7_13_v3	1536463	1540353	ID=PF3D7_1338000;Name=PF3D7_1338000;description=conserved+Plasmodium+membrane+protein%2C+unknown+function;size=3891;web_id=PF3D7_1338000;locus_tag=PF3D7_1338000;size=3891;Alias=XP_002809055.1,MAL13P1.189,296005466,C0H5F8,225631997,PF3D7_1338000,MAL13P1.189,813743,CAX64336.1
0.00107666	0	0.000773395	0	Pf3D7_13_v3	847090	848383	ID=PF3D7_1320600;Name=PF3D7_1320600;description=Rab+GTPase+11a+%28RAB11a%29;size=1294;web_id=PF3D7_1320600;locus_tag=PF3D7_1320600;size=1294;Alias=814090,rabCycle,CAA63652.1,Q25999,124513178,XP_001349945.1,1220272,PF13_0119,23615362,RAB11a,PF3D7_1320600,CAD52353.1,PF13_0119,rabIntracellular,Q76NM4,proteins
0.0038066	0	0.000779423	0	Pf3D7_08_v3	381564	382847	ID=PF3D7_0807300;Name=PF3D7_0807300;description=Rab+GTPase+18+%28RAB18%29;size=1284;web_id=PF3D7_0807300;locus_tag=PF3D7_0807300;size=1284;Alias=23499218,Q7K6B0,124512632,CAD27350.1,XP_001349449.1,Pfal005358AAA,MAL8P1.129,rabCycle,2655310,PF08_0110,rabIntracellular,RAB18,proteins,PF08_0110,19310063,PF3D7_0807300,CAD51298.1
0.000925775	0	0.000783085	0	Pf3D7_13_v3	1636556	1637833	ID=PF3D7_1341300;Name=PF3D7_1341300;description=60S+ribosomal+protein+L18-2%2C+putative;size=1278;web_id=PF3D7_1341300;locus_tag=PF3D7_1341300;size=1278;Alias=C0H5G3,XP_002809060.1,813765,MAL13P1.209,296005478,MAL13P1.209,CAX64341.1,PF3D7_1341300,12368867,ribosomeStruct,225632003
0.000409842	0	0.000789889	0	Pf3D7_11_v3	1856390	1857656	ID=PF3D7_1146900;Name=PF3D7_1146900;description=conserved+Plasmodium+membrane+protein%2C+unknown+function;size=1267;web_id=PF3D7_1146900;locus_tag=PF3D7_1146900;size=1267;Alias=ACT82988.1,PF11_0479a,258549146,PF3D7_1146900,8445008,C6S3G6,254832731,XP_002585444.1,PF11_0479a,12368864
0.000799555	0	0.000793021	0	Pf3D7_04_v3	729962	731223	ID=PF3D7_0416800;Name=PF3D7_0416800;description=small+GTP-binding+protein+sar1+%28SAR1%29;size=1262;web_id=PF3D7_0416800;locus_tag=PF3D7_0416800;size=1262;Alias=COPI,SAR1,COPII,812525,MCprot,Q8I1S0,6288737,23498233,PFD0810w,124505467,AAF06723.1,CAD49204.1,MAL4P1.157,PF3D7_0416800,XP_001351475.1,PFD0810w
0.00146631	0	0.000795545	0	Pf3D7_12_v3	1778154	1779411	ID=PF3D7_1241700;Name=PF3D7_1241700;description=replication+factor+C+subunit+4%2C+putative;size=1258;web_id=PF3D7_1241700;locus_tag=PF3D7_1241700;size=1258;Alias=PF3D7_1241700,811453,AAG37992.1,MAL12P1.399,11559514,AAN36485.1,PFL2005w,2277.t00401,12368867,23496934,DNArepair,12368864,DNAgenes,PFL2005w,excisionrepair,dnareplication,Q8I512,ExcisionRepairTab,124806707,XP_001350805.1
0.00174154	0	0.000805153	0	Pf3D7_09_v3	857587	858829	ID=PF3D7_0921000.1;Name=PF3D7_0921000.1;description=ubiquitin+conjugating+enzyme%2C+putative;size=1243;web_id=PF3D7_0921000.1;locus_tag=PF3D7_0921000.1;size=1243;Alias=ProteasomeMeditated,Q8I2U3,SCF,CAD51892.1,124506968,chaperone,complex_ubiquitin_ligase,23505110,XP_001352081.1,12368867,PF3D7_0921000.1,proteaUbiqpath,813486,PFI1030c,PFI1030c,proteasome_new
0.00174154	0	0.000805153	0	Pf3D7_09_v3	857587	858829	ID=PF3D7_0921000.2;Name=PF3D7_0921000.2;description=ubiquitin+conjugating+enzyme%2C+putative;size=1243;web_id=PF3D7_0921000.2;locus_tag=PF3D7_0921000.2;size=1243;Alias=PF3D7_0921000.2
0.00125714	0	0.000823045	0	Pf3D7_05_v3	1220777	1221992	ID=PF3D7_0529900;Name=PF3D7_0529900;description=RING+zinc+finger+protein%2C+putative;size=1216;web_id=PF3D7_0529900;locus_tag=PF3D7_0529900;size=1216;Alias=Q8I3G9,124506509,813111,MAL5P1.295,PFE1490c,12368867,CAD51659.1,PFE1490c,23504878,XP_001351852.1,PF3D7_0529900
3.05249e-05	0	0.000831947	0	Pf3D7_05_v3	81134	82336	ID=PF3D7_0501500;Name=PF3D7_0501500;description=rhoptry-associated+protein+3+%28RAP3%29;size=1203;web_id=PF3D7_0501500;locus_tag=PF3D7_0501500;size=1203;Alias=MCprot,RAP3,Merozoiteproteins,CAD51381.1,MAL5P1.16,Q8I485,PFE0075c,PF3D7_0501500,XP_001351574.1,812871,124505953,proteinsLocalizpath,23504501,PFE0075c
3.08327e-05	0	0.000840336	0	Pf3D7_09_v3	742494	743684	ID=PF3D7_0918000;Name=PF3D7_0918000;description=glideosome-associated+protein+50%2Csecreted+acid+phosphatase+%28GAP50%29;size=1191;web_id=PF3D7_0918000;locus_tag=PF3D7_0918000;size=1191;Alias=813456,GAP50,124506908,PF3D7_0918000,23505080,Q8I2X3,PFI0880c,XP_001352051.1,3TGH,PFI0880c,CAD51862.1,apicoplastgene,linearMotor
0.00121656	0	0.000841043	0	Pf3D7_13_v3	971847	973036	ID=PF3D7_1323400;Name=PF3D7_1323400;description=60S+ribosomal+protein+L23a%2C+putative;size=1190;web_id=PF3D7_1323400;locus_tag=PF3D7_1323400;size=1190;Alias=12368867,PF13_0132,CAD52382.1,PF13_0132,814103,Q8IE82,23615391,ribosomeStruct,124513236,PF3D7_1323400,XP_001349974.1
3.10677e-05	0	0.00084674	0	Pf3D7_12_v3	1601515	1602696	ID=PF3D7_1238600;Name=PF3D7_1238600;description=sphingomyelin+phosphodiesterase%2C+putative;size=1182;web_id=PF3D7_1238600;locus_tag=PF3D7_1238600;size=1182;Alias=Q8I537,811426,XP_001350780.1,AAN36460.1,PF3D7_1238600,23496908,PFL1870c,PFL1870c,AAL62029.1,26986098,2277.t00374,12368864,124806639,MAL12P1.372,CAC81929.1,sphingometpath,18157556
0.00044925	0	0.000851789	0	Pf3D7_05_v3	993433	994607	ID=PF3D7_0523900;Name=PF3D7_0523900;description=conserved+Plasmodium+membrane+protein%2C+unknown+function;size=1175;web_id=PF3D7_0523900;locus_tag=PF3D7_0523900;size=1175;Alias=PFE1190c,C0H4G1,PFE1190c,11738814,PF3D7_0523900,12368867,813053,MAL5P1.238
3.32997e-05	0	0.000857633	0	Pf3D7_10_v3	343733	344899	ID=PF3D7_1008200;Name=PF3D7_1008200;description=endonuclease%2C+putative;size=1167;web_id=PF3D7_1008200;locus_tag=PF3D7_1008200;size=1167;Alias=Q8IJW1,baseExcision,PF10_0080,nuclearGenes,810238,PF3D7_1008200,XP_001347365.1,excisionrepair,PF10_0080,ExcisionRepairTab,124802099,23494944,12368864,12368867,AAN35278.1
0.000623408	0	0.000865052	0	Pf3D7_13_v3	325215	326371	ID=PF3D7_1307000;Name=PF3D7_1307000;description=PNAS-3+related+protein%2C+putative;size=1157;web_id=PF3D7_1307000;locus_tag=PF3D7_1307000;size=1157;Alias=Ribosomegenes,CAD52204.1,PF3D7_1307000,XP_001349797.1,riboMaturation,qualityControl,124512882,Factors,mRNAdeg,23615214,MAL13P1.36,813925,MAL13P1.36,Q8IEP5
0.000857446	0	0.000867303	0	Pf3D7_03_v3	310652	311805	ID=PF3D7_0306900;Name=PF3D7_0306900;description=40S+ribosomal+protein+S23%2C+putative;size=1154;web_id=PF3D7_0306900;locus_tag=PF3D7_0306900;size=1154;Alias=814387,O97248,4493905,10448855,12368867,PFC0290w,124504805,MAL3P2.27,CAB39014.1,PF3D7_0306900,XP_001351145.1,PFC0290w,ribosomeStruct
0.00233039	0	0.000873362	0	Pf3D7_14_v3	2047793	2050083	ID=PF3D7_1450000;Name=PF3D7_1450000;description=serine%2Fthreonine+protein+kinase%2C+putative;size=2291;web_id=PF3D7_1450000;locus_tag=PF3D7_1450000;size=2291;Alias=255528876,258597837,PF3D7_1450000,XP_001348650.2,PF14_0476,PF14_0476,812058,12368864,AAN37089.2,Q8IKX5,Protein_kinases
6.37143e-05	0	0.000884956	0	Pf3D7_14_v3	2640872	2642002	ID=PF3D7_1465200;Name=PF3D7_1465200;description=conserved+Plasmodium+protein%2C+unknown+function;size=1131;web_id=PF3D7_1465200;locus_tag=PF3D7_1465200;size=1131;Alias=812201,12368864,PF14_0619,AAN37232.1,XP_001348793.1,23497693,PF3D7_1465200,Q8IKI6,124810186,PF14_0619
0.000687993	0	0.000895255	0	Pf3D7_06_v3	606142	607259	ID=PF3D7_0614500;Name=PF3D7_0614500;description=60S+ribosomal+protein+L19%2C+putative;size=1118;web_id=PF3D7_0614500;locus_tag=PF3D7_0614500;size=1118;Alias=MAL6P1.281,2270.t00035,CAG25383.2,PF3D7_0614500,C6KSY6,12368867,3885805,PFF0700c,225631740,ribosomeStruct,PFF0700c,296004668,XP_966131.2
0.00134812	0	0.000895255	0	Pf3D7_10_v3	1354454	1355571	ID=PF3D7_1033900;Name=PF3D7_1033900;description=ubiquitin+conjugating+enzyme%2C+putative;size=1118;web_id=PF3D7_1033900;locus_tag=PF3D7_1033900;size=1118;Alias=PF3D7_1033900,proteaUbiqpath,ProteasomeMeditated,PF10_0330,Pfal005717AAA,12368864,proteasome_new,124802851,CCR4,XP_001347614.1,PF10_0330,AAN35527.1,810487,Q8IJ70,12368867,23495197
0.000706144	0	0.000896459	0	Pf3D7_05_v3	902613	904844	ID=PF3D7_0522300;Name=PF3D7_0522300;description=S-adenosylmethionine-dependent+methyltransferase%2C+putative;size=2232;web_id=PF3D7_0522300;locus_tag=PF3D7_0522300;size=2232;Alias=XP_002808708.1,MAL5P1.223,PFE1115c,12368867,296004578,PF3D7_0522300,C0H4F7,methioninemetpath,813038,CAX63979.1,225631695,PFE1115c
3.29066e-05	0	0.000896861	0	Pf3D7_06_v3	946129	947244	ID=PF3D7_0623200;Name=PF3D7_0623200;description=ferredoxin+NADP+reductase+%28FNR%29;size=1116;web_id=PF3D7_0623200;locus_tag=PF3D7_0623200;size=1116;Alias=PF3D7_0623200,PFF1115w,CAG25044.1,BiosynthFeS,PFF1115w,3885862,46361180,C6KT68,86171451,2270.t00455,FNR,apicoplastgene,XP_966214.1,isoprenoidmetpath,MAL6P1.197
0.000714297	0	0.000899281	0	Pf3D7_06_v3	463564	464676	ID=PF3D7_0611000;Name=PF3D7_0611000;description=conserved+Plasmodium+membrane+protein%2C+unknown+function;size=1113;web_id=PF3D7_0611000;locus_tag=PF3D7_0611000;size=1113;Alias=CAG25351.2,225631728,2270.t00204,PFF0540c,C6KSV5,XP_966099.2,3885952,296004644,PFF0540c,PF3D7_0611000,12368867,MAL6P1.112
6.79809e-05	0	0.000909091	0	Pf3D7_05_v3	440779	441879	ID=PF3D7_0510300;Name=PF3D7_0510300;description=conserved+Plasmodium+protein%2C+unknown+function;size=1101;web_id=PF3D7_0510300;locus_tag=PF3D7_0510300;size=1101;Alias=PFE0510c,812834,MAL5P1.104,12368867,XP_001351661.1,Q8I401,PF3D7_0510300,23504589,PFE0510c,CAD51468.1,124506127
3.34466e-05	0	0.000911577	0	Pf3D7_05_v3	1013453	1014550	ID=PF3D7_0524400;Name=PF3D7_0524400;description=cytosolic+preribosomal+GTP-binding+protein%2C+putative;size=1098;web_id=PF3D7_0524400;locus_tag=PF3D7_0524400;size=1098;Alias=813058,XP_001351800.1,Ribosomegenes,PF3D7_0524400,MAL5P1.243,12368867,IGTP_bnd,PFE1215c,Q8I3M1,PFE1215c,CAD51607.1,124506405,23504826
0.000242577	0	0.000914913	0	Pf3D7_14_v3	1791911	1793004	ID=PF3D7_1443700;Name=PF3D7_1443700;description=dephospho-CoA+kinase%2C+putative;size=1094;web_id=PF3D7_1443700;locus_tag=PF3D7_1443700;size=1094;Alias=811997,Q8IL34,124809497,apicoplastgene,11738814,PF14_0415,PF14_0415,PF3D7_1443700,coasynthesis,XP_001348589.1,AAN37028.1,12368867,12368864,23497486
0.0003335	0	0.000914913	0	Pf3D7_09_v3	1350836	1351929	ID=PF3D7_0934500;Name=PF3D7_0934500;description=vacuolar+ATP+synthase+subunit+e%2C+putative;size=1094;web_id=PF3D7_0934500;locus_tag=PF3D7_0934500;size=1094;Alias=12368867,CAD52020.2,PPM,813614,transporters,XP_001352210.2,PF3D7_0934500,296005315,225631874,ERGolgiVacuole,PFI1670c,PFI1670c,Q8I2H3
0.00182741	0	0.000924214	0	Pf3D7_03_v3	875213	876295	ID=PF3D7_0320900;Name=PF3D7_0320900;description=histone+H2A+variant%2C+putative+%28H2A.Z%29;size=1083;web_id=PF3D7_0320900;locus_tag=PF3D7_0320900;size=1083;Alias=H2A.Z,814523,O97320,4494010,Histone,10448855,12368867,21187892,PFC0920w,124505075,MAL3P7.13,CAB39069.1,PF3D7_0320900,NucleoAssembly,XP_001351279.1,PFC0920w,histone_chaperone
0.000595601	0	0.000934579	0	Pf3D7_05_v3	724681	725751	ID=PF3D7_0517300;Name=PF3D7_0517300;description=pre-mRNA-splicing+factor+%28SR1%29;size=1071;web_id=PF3D7_0517300;locus_tag=PF3D7_0517300;size=1071;Alias=12368867,Q8I3T5,296004548,MAL5P1.173,CAD51537.2,PF3D7_0517300,812988,splicing,SR1,PFE0865c,225631680,PFE0865c,XP_001351730.2
0.000501528	0	0.000945626	0	Pf3D7_11_v3	1398486	1400601	ID=PF3D7_1135900;Name=PF3D7_1135900;description=3-oxo-5-alpha-steroid+4-dehydrogenase%2C+putative;size=2116;web_id=PF3D7_1135900;locus_tag=PF3D7_1135900;size=2116;Alias=Q8II05,254832687,PF3D7_1135900,810917,AAN35954.2,12368864,PF11_0370,XP_001348041.2,PF11_0370,258597363
6.86341e-05	0	0.000953289	0	Pf3D7_11_v3	437171	438220	ID=PF3D7_1111100;Name=PF3D7_1111100;description=replication+factor+C+subunit+5%2C+putative+%28RFC5%29;size=1050;web_id=PF3D7_1111100;locus_tag=PF3D7_1111100;size=1050;Alias=RFC5,12368867,ExcisionRepairTab,12368864,DNAgenes,23496041,124803688,XP_001347790.1,PF11_0117,dnareplication,AAN35703.1,excisionrepair,810666,PF3D7_1111100,PF11_0117,Q8IIQ1
0.00242535	0	0.000957854	0	Pf3D7_05_v3	254473	255517	ID=PF3D7_0505900;Name=PF3D7_0505900;description=conserved+Plasmodium+protein%2C+unknown+function;size=1045;web_id=PF3D7_0505900;locus_tag=PF3D7_0505900;size=1045;Alias=PFE0290c,12368867,C0H4C7,CAX63949.1,XP_002808678.1,812902,PF3D7_0505900,225631663,PFE0290c,MAL5P1.59,296004514
0.000414515	0	0.000963391	0	Pf3D7_14_v3	1296173	1297211	ID=PF3D7_1432900;Name=PF3D7_1432900;description=SF-assemblin%2C+putative;size=1039;web_id=PF3D7_1432900;locus_tag=PF3D7_1432900;size=1039;Alias=AAN36924.1,PF14_0311,811893,PF3D7_1432900,23497380,124809078,XP_001348485.1,12368864,microtubuleDynam,PF14_0311,Q8ILD3
0.00111631	0	0.00096432	0	Pf3D7_02_v3	404281	406355	ID=PF3D7_0209800;Name=PF3D7_0209800;description=ATP-dependent+RNA+helicase+UAP56+%28UAP56%29;size=2075;web_id=PF3D7_0209800;locus_tag=PF3D7_0209800;size=2075;Alias=UAP56,812689,Q9TY94,3845186,PFB0445c,redoxReg,splicing,124801080,156072122,PF02_0093,bulk_mRna,AAC71878.1,ABU45412.1,PF3D7_0209800,XP_001349607.1,PFB0445c
0.000102238	0	0.000965251	0	Pf3D7_14_v3	1622576	1623612	ID=PF3D7_1439900;Name=PF3D7_1439900;description=triosephosphate+isomerase+%28TIM%29;size=1037;web_id=PF3D7_1439900;locus_tag=PF3D7_1439900;size=1037;Alias=160706,MCprot,isoprenoidmetpath,Q7KQM0,586112,12368864,811960,1YDV,Q07412.1,AAA18799.1,Q7KQM0.1,AAN36991.1,XP_001348552.1,glycolysispath,23497448,TIM,649183,PF14_0378,75009812,649896,651284,2589,PF14_0378,12368867,PF3D7_1439900,663371,124809349…
0.00085646	0	0.000965251	0	Pf3D7_14_v3	1826127	1827163	ID=PF3D7_1444200;Name=PF3D7_1444200;description=calmodulin-like+protein;size=1037;web_id=PF3D7_1444200;locus_tag=PF3D7_1444200;size=1037;Alias=calmodulin,812002,23497491,AAN37033.1,Q8IL29,PF14_0420,12368864,XP_001348594.1,PF14_0420,PF3D7_1444200,124809520
0.00117302	0	0.000970403	0	Pf3D7_11_v3	1071752	1073813	ID=PF3D7_1127600;Name=PF3D7_1127600;description=CRAL%2FTRIO+domain-containing+protein%2C+putative;size=2062;web_id=PF3D7_1127600;locus_tag=PF3D7_1127600;size=2062;Alias=inosiPhosphmetpath,Q8II87,810834,AAN35871.2,254832666,258597328,PF11_0287,PF3D7_1127600,12368864,XP_001347958.2,PF11_0287
0.0006186	0	0.000970874	0	Pf3D7_14_v3	2604381	2605411	ID=PF3D7_1464400;Name=PF3D7_1464400;description=zinc+finger+protein%2C+putative;size=1031;web_id=PF3D7_1464400;locus_tag=PF3D7_1464400;size=1031;Alias=258597893,12368864,XP_001348786.2,Q8IKJ3,812194,PF3D7_1464400,AAN37225.2,PF14_0612,255528910,PF14_0612
0.00138492	0	0.000972763	0	Pf3D7_13_v3	1021509	1022537	ID=PF3D7_1324400;Name=PF3D7_1324400;description=MSF1-like+protein%2C+putative;size=1029;web_id=PF3D7_1324400;locus_tag=PF3D7_1324400;size=1029;Alias=phserine,CAD52392.1,PF13_0138,XP_001349984.1,814109,23615401,PF13_0138,124513256,PF3D7_1324400,Q8IE73
3.60601e-05	0	0.00097371	0	Pf3D7_14_v3	2323772	2325826	ID=PF3D7_1456700;Name=PF3D7_1456700;description=conserved+Plasmodium+protein%2C+unknown+function;size=2055;web_id=PF3D7_1456700;locus_tag=PF3D7_1456700;size=2055;Alias=12368864,XP_001348714.1,124809912,PF14_0540,Q8IKR2,PF14_0540,23497613,812122,PF3D7_1456700,AAN37153.1
0.00151395	0	0.000980873	0	Pf3D7_11_v3	1128774	1130813	ID=PF3D7_1129200;Name=PF3D7_1129200;description=26S+proteasome+regulatory+subunit%2C+putative;size=2040;web_id=PF3D7_1129200;locus_tag=PF3D7_1129200;size=2040;Alias=258597334,810850,PF3D7_1129200,12368864,PF11_0303,254832669,12368867,PF11_0303,AAN35887.2,Q8II71,proteaUbiqpath,XP_001347974.2,proteasome_new
0.000330971	0	0.000987167	0	Pf3D7_12_v3	613561	614574	ID=PF3D7_1214600;Name=PF3D7_1214600;description=adrenodoxin-type+ferredoxin%2C+putative;size=1014;web_id=PF3D7_1214600;locus_tag=PF3D7_1214600;size=1014;Alias=PF3D7_1214600,PFL0705c,2277.t00142,MAL12P1.141,PFL0705c,Q8I5R0,AAN36230.2,XP_001350550.2,SprotTab,12368864,nuclearGenes,254945367,811194,BiogenesisCytochromeOxidase,258597480,12368867,FeSProtein
0.000512412	0	0.000990099	0	Pf3D7_13_v3	2679415	2680425	ID=PF3D7_1367000;Name=PF3D7_1367000;description=suppressor+of+kinetochore+protein+1%2C+putative;size=1011;web_id=PF3D7_1367000;locus_tag=PF3D7_1367000;size=1011;Alias=XP_001350381.2,813904,CAD52790.2,proteasome_new,SCF,MAL13P1.337,PF3D7_1367000,225632056,organizKinetochore,Centriole,MAL13P1.337,chaperone,296005584,Q8ID38
3.64358e-05	0	0.000993049	0	Pf3D7_11_v3	365093	366100	ID=PF3D7_1108400;Name=PF3D7_1108400;description=casein+kinase+2%2C+alpha+subunit+%28CK2alpha%29;size=1008;web_id=PF3D7_1108400;locus_tag=PF3D7_1108400;size=1008;Alias=CK2alpha,calmodulin,124803615,23496022,Q8IIR9,Protein_kinases,PF11_0096,AAN35684.1,810647,centrosome,PF3D7_1108400,XP_001347771.1,PF11_0096
0.00186703	0	0.00100503	0	Pf3D7_06_v3	351780	352775	ID=PF3D7_0608500;Name=PF3D7_0608500;description=proteasome+subunit+alpha+type+2%2C+putative;size=996;web_id=PF3D7_0608500;locus_tag=PF3D7_0608500;size=996;Alias=PF3D7_0608500,2270.t00228,12368867,46361040,proteases,86170740,XP_966075.1,C6KST3,proteaUbiqpath,PFF0420c,CAG25327.1,MAL6P1.88,PFF0420c,3885908,proteasome_new
3.72119e-05	0	0.0010142	0	Pf3D7_05_v3	660150	661136	ID=PF3D7_0515900;Name=PF3D7_0515900;description=protein+phosphatase%2C+putative;size=987;web_id=PF3D7_0515900;locus_tag=PF3D7_0515900;size=987;Alias=12368867,CAD51523.1,MAL5P1.159,PFE0795c,Phos_tmd_exprs,PFE0795c,XP_001351716.1,nuclearGenes,124506237,812973,23504645,PF3D7_0515900,Q8I3U9
0.000209051	0	0.0010142	0	Pf3D7_05_v3	868892	869878	ID=PF3D7_0521200;Name=PF3D7_0521200;description=conserved+Plasmodium+protein%2C+unknown+function;size=987;web_id=PF3D7_0521200;locus_tag=PF3D7_0521200;size=987;Alias=12368867,PFE1065w,CAX63976.1,C0H4F4,PF3D7_0521200,225631692,MAL5P1.213,XP_002808705.1,813028,296004572,PFE1065w
0.000213378	0	0.0010142	0	Pf3D7_09_v3	873971	874957	ID=PF3D7_0921400;Name=PF3D7_0921400;description=Fe-S-cluster+redox+enzyme%2C+putative+%28NifU%29;size=987;web_id=PF3D7_0921400;locus_tag=PF3D7_0921400;size=987;Alias=Q8I2T9,CAD51896.1,PFI1050c,124506976,23505114,PF3D7_0921400,813490,12368867,apicoplastgene,11738814,PFI1050c,FeSProtein,XP_001352085.1,NifU,BiosynthFeS
0.000819696	0	0.00101937	0	Pf3D7_14_v3	1368815	1369796	ID=PF3D7_1434200;Name=PF3D7_1434200;description=calmodulin;size=982;web_id=PF3D7_1434200;locus_tag=PF3D7_1434200;size=982;Alias=P62203,AAA29510.1,12368864,P62203.2,115520,XP_001348497.1,160128,124809127,calmodulin,811905,49035519,AAA29508.1,AAN36936.1,PF14_0323,23497392,385234,PF3D7_1434200,P24044.4,PF14_0323
3.74206e-05	0	0.00101989	0	Pf3D7_03_v3	298517	300478	ID=PF3D7_0306400;Name=PF3D7_0306400;description=FAD-dependent+glycerol-3-phosphate+dehydrogenase%2C+putative;size=1962;web_id=PF3D7_0306400;locus_tag=PF3D7_0306400;size=1962;Alias=814382,O97245,4493902,10448855,12368867,PFC0275w,124504795,MAL3P2.24,CAB39011.1,nuclearGenes,PF3D7_0306400,XP_001351140.1,PFC0275w,glycolysispath,mitochondrionef
0.000676277	0	0.00102354	0	Pf3D7_11_v3	250918	252872	ID=PF3D7_1105800;Name=PF3D7_1105800;description=conserved+Plasmodium+protein%2C+unknown+function;size=1955;web_id=PF3D7_1105800;locus_tag=PF3D7_1105800;size=1955;Alias=810621,258597207,PF11_0069,254832596,PF3D7_1105800,XP_001347745.2,AAN35658.2,12368864,Q8IIU5,PF11_0069
8.47747e-05	0	0.00102564	0	Pf3D7_14_v3	1618819	1619794	ID=PF3D7_1439800;Name=PF3D7_1439800;description=vesicle-associated+membrane+protein%2C+putative;size=976;web_id=PF3D7_1439800;locus_tag=PF3D7_1439800;size=976;Alias=vesExocytosis,XP_001348551.1,811959,PF3D7_1439800,AAN36990.1,PF14_0377,Pviv003778AAA,Q8IL71,12368867,23497447,12368864,PF14_0377,124809346
0.000217857	0	0.0010352	0	Pf3D7_13_v3	2146181	2147147	ID=PF3D7_1353600;Name=PF3D7_1353600;description=ER+lumen+protein+retaining+receptor+%28ERD2%29;size=967;web_id=PF3D7_1353600;locus_tag=PF3D7_1353600;size=967;Alias=398385,PF13_0280,XP_001350248.1,er_golgi_tr_qa,PF3D7_1353600,406590,462022,813646,CAD52657.1,Q76NM1,CAA81128.1,Q76NM1.1,ERD2,PF13_0280,124513784,50400381,CAA52861.1,P33948.1,23615665
0.000195011	0	0.00103734	0	Pf3D7_09_v3	789514	790478	ID=PF3D7_0919200;Name=PF3D7_0919200;description=PPPDE+peptidase%2C+putative;size=965;web_id=PF3D7_0919200;locus_tag=PF3D7_0919200;size=965;Alias=813468,PF3D7_0919200,PFI0940c,PFI0940c,124506932,12368867,XP_001352063.1,CAD51874.1,23505092,Q8I2W1
0.000745286	0	0.00103734	0	Pf3D7_03_v3	837307	838271	ID=PF3D7_0320000;Name=PF3D7_0320000;description=conserved+Plasmodium+protein%2C+unknown+function;size=965;web_id=PF3D7_0320000;locus_tag=PF3D7_0320000;size=965;Alias=814514,C0H480,10448855,12368867,PFC0886w,225685562,296004370,CAX64439.1,PF3D7_0320000,XP_002808630.1,PFC0886w
0.000925986	0	0.00104493	0	Pf3D7_10_v3	958939	959896	ID=PF3D7_1022900;Name=PF3D7_1022900;description=CDGSH+iron-sulfur+domain-containing+protein%2C+putative;size=958;web_id=PF3D7_1022900;locus_tag=PF3D7_1022900;size=958;Alias=PF10_0222,XP_001347506.2,Q8IJH6,254922448,258597089,PF3D7_1022900,BiosynthFeS,12368864,810379,FeSProtein,AAN35419.2,PF10_0222
3.8622e-05	0	0.00105263	0	Pf3D7_11_v3	1165221	1166171	ID=PF3D7_1130200;Name=PF3D7_1130200;description=60S+ribosomal+protein+P0;size=951;web_id=PF3D7_1130200;locus_tag=PF3D7_1130200;size=951;Alias=PF11_0313,PF3D7_1130200,12368867,21278348,XP_001347984.1,124804377,Q8II61,12368864,ribosomeStruct,810860,23496238,AAN35897.1,PF11_0313
0.000252528	0	0.00105263	0	Pf3D7_09_v3	175542	177442	ID=PF3D7_0903700;Name=PF3D7_0903700;description=alpha+tubulin+1;size=1901;web_id=PF3D7_0903700;locus_tag=PF3D7_0903700;size=1901;Alias=P14642.1,813316,CAD51722.1,XP_001351911.1,124506627,Q6ZLZ9,cont_micro_asse,tubulin,23504938,mitoticCentro,PFI0180w,CAA34101.1,PFI0180w,PF3D7_0903700,protPV,Centriole,centrosome,9980,Kinetochore,microtubuleDynam,135436,12368867
0.000209365	0	0.00105374	0	Pf3D7_03_v3	965553	966502	ID=PF3D7_0322900;Name=PF3D7_0322900;description=40S+ribosomal+protein+S3A%2C+putative;size=950;web_id=PF3D7_0322900;locus_tag=PF3D7_0322900;size=950;Alias=814544,O97313,4494003,10448855,12368867,74894163,O97313.1,PFC1020c,124505117,MAL3P7.35,CAB39062.1,PF3D7_0322900,XP_001351300.1,PFC1020c,ribosomeStruct
0.00118041	0	0.00105485	0	Pf3D7_03_v3	463326	464274	ID=PF3D7_0310700;Name=PF3D7_0310700;description=sybindin-like+protein%2C+putative;size=949;web_id=PF3D7_0310700;locus_tag=PF3D7_0310700;size=949;Alias=814422,O77358,7672214,10448855,12368867,PFC0445w,rabCycle,124504875,MAL3P4.24,CAA15613.2,PF3D7_0310700,XP_001351180.1,PFC0445w,largeTethering
0.00185404	0	0.00105597	0	Pf3D7_06_v3	341874	342821	ID=PF3D7_0608200;Name=PF3D7_0608200;description=conserved+Plasmodium+protein%2C+unknown+function;size=948;web_id=PF3D7_0608200;locus_tag=PF3D7_0608200;size=948;Alias=XP_966072.2,PFF0405c,MAL6P1.85,225631724,CAG25252.2,PFF0405c,PF3D7_0608200,3885905,12368867,296004636,C6KST0,2270.t00443
0.00371508	0	0.00106045	0	Pf3D7_07_v3	1258787	1259730	ID=PF3D7_0729600;Name=PF3D7_0729600;description=conserved+Plasmodium+protein%2C+unknown+function;size=944;web_id=PF3D7_0729600;locus_tag=PF3D7_0729600;size=944;Alias=PF3D7_0729600
0.00115622	0	0.00106838	0	Pf3D7_09_v3	617963	619835	ID=PF3D7_0914400;Name=PF3D7_0914400;description=conserved+Plasmodium+protein%2C+unknown+function;size=1873;web_id=PF3D7_0914400;locus_tag=PF3D7_0914400;size=1873;Alias=PFI0705w,124506837,XP_001352016.1,813421,23505044,PF3D7_0914400,PFI0705w,12368867,Q8I308,CAD51827.1
0.000394698	0	0.00107875	0	Pf3D7_13_v3	68484	69411	ID=PF3D7_1301100;Name=PF3D7_1301100;description=Plasmodium+exported+protein+%28PHISTa%29%2C+unknown+function%2C+pseudogene;size=928;web_id=PF3D7_1301100;locus_tag=PF3D7_1301100;size=928;Alias=PF3D7_1301100,813657,MAL13P1.11a,MAL13P1.11,MAL13P1.11
0.000190652	0	0.00107991	0	Pf3D7_12_v3	971268	972194	ID=PF3D7_1223800;Name=PF3D7_1223800;description=mitochondrial+carrier+protein%2C+putative;size=927;web_id=PF3D7_1223800;locus_tag=PF3D7_1223800;size=927;Alias=AAN36315.1,PFL1145w,124806128,transporters,MAL12P1.229,811281,PF3D7_1223800,12368864,2277.t00229,23496760,mitochonApico,nuclearGenes,XP_001350635.1,Q8I5H9,PFL1145w
0.00149626	0	0.0010846	0	Pf3D7_11_v3	589707	590629	ID=PF3D7_1115600;Name=PF3D7_1115600;description=peptidyl-prolyl+cis-trans+isomerase+%28CYP19B%29;size=923;web_id=PF3D7_1115600;locus_tag=PF3D7_1115600;size=923;Alias=AAN35748.1,CAA59933.1,PF3D7_1115600,810711,PF11_0164,124803860,23496087,XP_001347835.1,758222,centrosome,CYP19B,PF11_0164,chapfold,Q8IIK8,eukaryotes,Pf_chaperones,protER
0.00145738	0	0.0010917	0	Pf3D7_09_v3	1097324	1098240	ID=PF3D7_0926900;Name=PF3D7_0926900;description=conserved+Plasmodium+protein%2C+unknown+function;size=917;web_id=PF3D7_0926900;locus_tag=PF3D7_0926900;size=917;Alias=PFI1320c,XP_001352139.1,12368867,CAD51950.1,23505169,813544,PFI1320c,PF3D7_0926900,Q8I2P0,124507085
4.01432e-05	0	0.00109409	0	Pf3D7_12_v3	1955124	1956038	ID=PF3D7_1247400;Name=PF3D7_1247400;description=FK506-binding+protein+%28FKBP%29-type+peptidyl-prolyl+isomerase+%28FKBP35%29;size=915;web_id=PF3D7_1247400;locus_tag=PF3D7_1247400;size=915;Alias=Pf_chaperones,chapfold,MAL12P1.454,811507,centrosome,Pber002870AAA,PF3D7_1247400,protPV,PFL2275c,AAN36539.1,662803,FKBP35,XP_001350859.1,hist_chap,23496988,2277.t00455,124806892,Q8I4V8,2555,PFL2275c,2534
0.000866636	0	0.00109409	0	Pf3D7_02_v3	489904	490818	ID=PF3D7_0212200;Name=PF3D7_0212200;description=mitochondrial+ribosomal+protein+L12+precursor%2C+putative;size=915;web_id=PF3D7_0212200;locus_tag=PF3D7_0212200;size=915;Alias=812710,O96202,9804551,11738814,12368864,12368867,23503392,PFB0545c,124801197,PF02_0114,AAC71898.2,nuclearGenes,PF3D7_0212200,XP_001349628.1,apicoplastgene,PFB0545c,ribosomeStruct
0.00055018	0	0.0010989	0	Pf3D7_05_v3	715765	716675	ID=PF3D7_0517000;Name=PF3D7_0517000;description=60S+ribosomal+protein+L12%2C+putative;size=911;web_id=PF3D7_0517000;locus_tag=PF3D7_0517000;size=911;Alias=12368867,Q8I3T8,PFE0850c,ribosomeStruct,PF3D7_0517000,812985,CAD51534.2,PFE0850c,296004544,PFE0850w,225631678,XP_001351727.2
4.05424e-05	0	0.00110497	0	Pf3D7_10_v3	1477940	1478845	ID=PF3D7_1037300;Name=PF3D7_1037300;description=ADP%2FATP+transporter+on+adenylate+translocase;size=906;web_id=PF3D7_1037300;locus_tag=PF3D7_1037300;size=906;Alias=124802973,23495233,AAN35563.1,XP_001347650.1,810523,mitochonApico,12368867,nuclearGenes,apoptosis,PF10_0366,PF10_0366,transporters,12368864,Q8IJ34,PF3D7_1037300,MCprot
4.09497e-05	0	0.00111607	0	Pf3D7_14_v3	142242	143138	ID=PF3D7_1403900;Name=PF3D7_1403900;description=phosphatase%2C+putative;size=897;web_id=PF3D7_1403900;locus_tag=PF3D7_1403900;size=897;Alias=PF14_0036,258597632,255528758,811618,Phos_tmd_exprs,redoxReg,PF14_0036,12368864,AAN36648.2,Q8IM55,riboflavin,PF3D7_1403900,XP_001348209.2
0.000405518	0	0.00111857	0	Pf3D7_11_v3	1798776	1799670	ID=PF3D7_1145300;Name=PF3D7_1145300;description=conserved+Plasmodium+protein%2C+unknown+function;size=895;web_id=PF3D7_1145300;locus_tag=PF3D7_1145300;size=895;Alias=XP_002585443.1,254832723,12368864,258549144,PF3D7_1145300,8444991,ACT82987.1,PF11_0464a,C6S3G5,PF11_0464a,microtubuleDynam
4.13652e-05	0	0.0011274	0	Pf3D7_12_v3	1065796	1066683	ID=PF3D7_1226300;Name=PF3D7_1226300;description=cof-like+hydrolase%2C+had-superfamily%2C+subfamily+iib;size=888;web_id=PF3D7_1226300;locus_tag=PF3D7_1226300;size=888;Alias=PFL1270w,AAN36340.1,12368864,MAL12P1.254,PF3D7_1226300,124806216,23496786,811306,XP_001350660.1,Pviv002324AAA,2277.t00254,Q8I5F4,PFL1270w
0.00160119	0	0.00113636	0	Pf3D7_11_v3	1449690	1451450	ID=PF3D7_1136800;Name=PF3D7_1136800;description=DnaJ+protein%2C+putative;size=1761;web_id=PF3D7_1136800;locus_tag=PF3D7_1136800;size=1761;Alias=Pf_chaperones,258597365,12368864,PF11_0380,PF11_0380,810926,PF3D7_1136800,AAN35963.2,XP_001348050.2,254832690,Q8IHZ6
0.000895694	0	0.00116618	0	Pf3D7_14_v3	881957	883672	ID=PF3D7_1421400;Name=PF3D7_1421400;description=DNA-directed+RNA+polymerase+III+subunit+C%2C+putative;size=1716;web_id=PF3D7_1421400;locus_tag=PF3D7_1421400;size=1716;Alias=Q8ILN6,811789,12368864,12368867,RNApolyIII,PF14_0207,PF3D7_1421400,RNApolyStruct,PF14_0207
0.00104916	0	0.00116959	0	Pf3D7_14_v3	323317	324172	ID=PF3D7_1408600;Name=PF3D7_1408600;description=40S+ribosomal+protein+S8e%2C+putative;size=856;web_id=PF3D7_1408600;locus_tag=PF3D7_1408600;size=856;Alias=124808201,PF14_0083,811585,PF14_0083,12368864,Q8IM10,12368867,XP_001348256.1,23497147,AAN36695.1,ribosomeStruct,PF3D7_1408600
0.00100292	0	0.00117371	0	Pf3D7_08_v3	680957	681809	ID=PF3D7_0814000;Name=PF3D7_0814000;description=60S+ribosomal+protein+L13-2%2C+putative;size=853;web_id=PF3D7_0814000;locus_tag=PF3D7_0814000;size=853;Alias=Q8IAX6,ribosomeStruct,PF08_0075,12368867,CAD51234.1,XP_001349385.1,PF3D7_0814000,2655274,124512504,23499154,PF08_0075
0.00100789	0	0.00117647	0	Pf3D7_09_v3	500183	502733	ID=PF3D7_0911000;Name=PF3D7_0911000;description=phosphatidylinositol+N-acetylglucosaminyltransferase%2C+putative;size=2551;web_id=PF3D7_0911000;locus_tag=PF3D7_0911000;size=2551;Alias=PFI0535w,CAX64209.1,PF3D7_0911000,C0H532,813387,XP_002808928.1,gpiAnchor1path,PFI0535w,225631814,296005193,12368867
0.00162719	0	0.00118343	0	Pf3D7_14_v3	973853	975543	ID=PF3D7_1424100;Name=PF3D7_1424100;description=60S+ribosomal+protein+L5%2C+putative;size=1691;web_id=PF3D7_1424100;locus_tag=PF3D7_1424100;size=1691;Alias=PF3D7_1424100,23497297,811812,124808771,PF14_0230,12368864,12368867,XP_001348404.1,ribosomeStruct,Q8ILL3,PF14_0230,AAN36843.1
0.000318907	0	0.00118906	0	Pf3D7_13_v3	489927	491609	ID=PF3D7_1311500;Name=PF3D7_1311500;description=26S+proteasome+regulatory+subunit+7%2C+putative;size=1683;web_id=PF3D7_1311500;locus_tag=PF3D7_1311500;size=1683;Alias=proteaUbiqpath,814041,296005359,CAD52250.2,12368867,Q8IEK3,proteasome_new,PF13_0063,XP_001349843.2,225631944,PF3D7_1311500,PF13_0063
0.00252617	0	0.00119332	0	Pf3D7_04_v3	649893	650731	ID=PF3D7_0414300;Name=PF3D7_0414300;description=conserved+Plasmodium+protein%2C+unknown+function;size=839;web_id=PF3D7_0414300;locus_tag=PF3D7_0414300;size=839;Alias=812568,C0H4A3,12368867,PFD0669c,225631635,296004418,CAX63921.1,MAL4P1.133b,PF3D7_0414300,XP_002808651.1,PFD0669c
4.38886e-05	0	0.00119617	0	Pf3D7_13_v3	1604376	1605212	ID=PF3D7_1340100;Name=PF3D7_1340100;description=exosome+complex+component+RRP42%2C+putative+%28RRP42%29;size=837;web_id=PF3D7_1340100;locus_tag=PF3D7_1340100;size=837;Alias=RRP42,124513540,mRNAdeg,12368867,XP_001350126.1,MAL13P1.204,PF3D7_1340100,qualityControl,rRNAstruct,813762,23615543,CAD52535.1,Q8IDT4,MAL13P1.204,Factors
0.000546252	0	0.0011976	0	Pf3D7_08_v3	965822	966657	ID=PF3D7_0821400;Name=PF3D7_0821400;description=conserved+Plasmodium+protein%2C+unknown+function;size=836;web_id=PF3D7_0821400;locus_tag=PF3D7_0821400;size=836;Alias=23499080,MAL8P1.52,MAL8P1.52,124512356,CAD51160.1,PF3D7_0821400,Q8IB48,XP_001349311.1,2655351
5.81982e-05	0	0.00120096	0	Pf3D7_14_v3	2090902	2093400	ID=PF3D7_1451100;Name=PF3D7_1451100;description=elongation+factor+2;size=2499;web_id=PF3D7_1451100;locus_tag=PF3D7_1451100;size=2499;Alias=PF3D7_1451100,23497558,124809712,proteinBiosynth,PF14_0486,XP_001348660.1,elongat_f2,redoxReg,AAN37099.1,12368864,812068,Q8IKW5,PF14_0486
0.00223365	0	0.00120555	0	Pf3D7_08_v3	1226750	1228409	ID=PF3D7_0828500;Name=PF3D7_0828500;description=translation+initiation+factor+EIF-2b+alpha+subunit%2C+putative;size=1660;web_id=PF3D7_0828500;locus_tag=PF3D7_0828500;size=1660;Alias=PF08_0009,Pfal005257AAA,intTranslation,PF3D7_0828500,2655458,23499010,PF08_0009,XP_001349241.1,124512216,12368867,CAD51090.1,Q8IBB6
4.51953e-05	0	0.00120919	0	Pf3D7_01_v3	326397	327224	ID=PF3D7_0107900;Name=PF3D7_0107900;description=conserved+Plasmodium+protein%2C+unknown+function;size=828;web_id=PF3D7_0107900;locus_tag=PF3D7_0107900;size=828;Alias=PFA0395c,PFA0395w,PF3D7_0107900,PFA0395w
0.000720743	0	0.00121065	0	Pf3D7_12_v3	348274	349100	ID=PF3D7_1207500;Name=PF3D7_1207500;description=conserved+Plasmodium+protein%2C+unknown+function;size=827;web_id=PF3D7_1207500;locus_tag=PF3D7_1207500;size=827;Alias=MAL12P1.75,258597464,XP_001350484.2,PFL0375w,PF3D7_1207500,2277.t00076,AAN36164.2,811128,11738814,12368864,Q8I5X0,PFL0375w,254945357
0.000682991	0	0.00121212	0	Pf3D7_06_v3	764667	765492	ID=PF3D7_0618200;Name=PF3D7_0618200;description=conserved+Plasmodium+protein%2C+unknown+function;size=826;web_id=PF3D7_0618200;locus_tag=PF3D7_0618200;size=826;Alias=PF3D7_0618200,225631747,MAL6P1.245,2270.t00463,3885801,PFF0880c,12368867,296004682,C6KT22,XP_966167.2,CAG24997.2,PFF0880c
0.000371308	0	0.00121655	0	Pf3D7_11_v3	291680	292502	ID=PF3D7_1107000;Name=PF3D7_1107000;description=U6+snRNA-associated+Sm-like+protein+LSm4%2C+putative+%28LSM4%29;size=823;web_id=PF3D7_1107000;locus_tag=PF3D7_1107000;size=823;Alias=LSM4,PF11_0524,arginine,810633,AAN35670.2,nuclearGenes,254832602,PF11_0524,PF3D7_1107000,Q8IIT3,12368864,splicing,XP_001347757.2,258597219,Factors
4.46542e-05	0	0.00121704	0	Pf3D7_07_v3	264973	267438	ID=PF3D7_0705400;Name=PF3D7_0705400;description=minchromosome+maintenance+%28MCM%29+complex+subunit%2C+putative+%28MCM7%29;size=2466;web_id=PF3D7_0705400;locus_tag=PF3D7_0705400;size=2466;Alias=PF07_0023,replicationForm,XP_001348987.1,23498755,2655059,Q8IC16,124511708,MCM7,CAD50825.1,PF3D7_0705400,PF07_0023,hist_chap
8.76945e-05	0	0.00121803	0	Pf3D7_13_v3	1214907	1215728	ID=PF3D7_1328800;Name=PF3D7_1328800;description=transcriptional+regulatory+protein+sir2a+%28SIR2A%29;size=822;web_id=PF3D7_1328800;locus_tag=PF3D7_1328800;size=822;Alias=SIR2A,Histone,XP_001350011.1,chrom_mod_prot,termilalCleavage,124513310,Q8IE47,PF3D7_1328800,23615428,sir_deac_ADP,PF13_0152,814122,CAD52419.1,PF13_0152,NucleoAssembly
4.52458e-05	0	0.00122175	0	Pf3D7_08_v3	621805	623442	ID=PF3D7_0812400;Name=PF3D7_0812400;description=karyopherin+alpha+%28KARalpha%29;size=1638;web_id=PF3D7_0812400;locus_tag=PF3D7_0812400;size=1638;Alias=PF3D7_0812400,124512536,Q8IAW0,23499170,12368867,CAD51250.1,PF08_0087,29501524,2655286,import_export,AAO85774.1,XP_001349401.1,KARalpha,PF08_0087
4.48544e-05	0	0.00122249	0	Pf3D7_08_v3	1254558	1255376	ID=PF3D7_0829200;Name=PF3D7_0829200;description=prohibitin%2C+putative;size=819;web_id=PF3D7_0829200;locus_tag=PF3D7_0829200;size=819;Alias=CAD51083.1,23499003,Q8IBC3,PF08_0006,XP_001349234.1,2655455,124512202,PF08_0006,nuclearGenes,PF3D7_0829200,peptideExport,12368867
0.000391914	0	0.00122549	0	Pf3D7_02_v3	831189	832005	ID=PF3D7_0220600;Name=PF3D7_0220600;description=Plasmodium+exported+protein+%28hyp9%29%2C+unknown+function;size=817;web_id=PF3D7_0220600;locus_tag=PF3D7_0220600;size=817;Alias=812789,O96278,9804551,11738814,12368864,23503441,PFB0930w,124801483,PF02_0193,AAC71975.2,PF3D7_0220600,XP_001349707.1,PFB0930w
0.00104386	0	0.00123865	0	Pf3D7_12_v3	272320	274742	ID=PF3D7_1206100;Name=PF3D7_1206100;description=IMP-specific+5%27-nucleotidase%2C+putative%2Chaloacid+dehalogenase+hydrolase%2C+putative;size=2423;web_id=PF3D7_1206100;locus_tag=PF3D7_1206100;size=2423;Alias=PFL0305c,purinemetpath,Q8I5Y4,PFL0305c,811114,PF3D7_1206100,2277.t00062,12368864,MAL12P1.61
0.00138941	0	0.00124378	0	Pf3D7_11_v3	670711	671515	ID=PF3D7_1117700;Name=PF3D7_1117700;description=GTP-binding+nuclear+protein+ran%2Ftc4+%28RAN%29;size=805;web_id=PF3D7_1117700;locus_tag=PF3D7_1117700;size=805;Alias=AAN35767.1,MCprot,organizKinetochore,exportin,810730,476130,XP_001615294.1,23496106,centrosome,PF11_0183,15072338,156098524,AAA19587.1,585782,XP_001347854.1,RAN,PF11_0183,EDL45567.1,AAG12165.1,P38545.1,124803934,Q7KQK6,PF3D7_1117700,i…
0.000619787	0	0.00124688	0	Pf3D7_01_v3	71624	72426	ID=PF3D7_0101200;Name=PF3D7_0101200;description=Plasmodium+exported+protein+%28hyp4%29%2C+unknown+function;size=803;web_id=PF3D7_0101200;locus_tag=PF3D7_0101200;size=803;Alias=MAL1P1.3,PFA0060w,PF3D7_0101200,PFA0060w
0.00129804	0	0.00124688	0	Pf3D7_11_v3	1030679	1031481	ID=PF3D7_1126400;Name=PF3D7_1126400;description=large+ribosomal+subunit+processing+factor%2C+putative;size=803;web_id=PF3D7_1126400;locus_tag=PF3D7_1126400;size=803;Alias=PF3D7_1126400,PF11_0274,12368864,23496199,AAN35858.1,Ribosomegenes,810821,PF11_0274,Q8IIA0,124804245,XP_001347945.1
0.000653483	0	0.00127551	0	Pf3D7_11_v3	1065785	1066569	ID=PF3D7_1127400;Name=PF3D7_1127400;description=conserved+Plasmodium+protein%2C+unknown+function;size=785;web_id=PF3D7_1127400;locus_tag=PF3D7_1127400;size=785;Alias=PF11_0285,PF11_0285,11738814,810832,AAN35869.1,12368864,PF3D7_1127400,23496210,XP_001347956.1,124804283,Q8II89
0.000137873	0	0.00127877	0	Pf3D7_14_v3	2837319	2838101	ID=PF3D7_1469100;Name=PF3D7_1469100;description=conserved+Plasmodium+protein%2C+unknown+function;size=783;web_id=PF3D7_1469100;locus_tag=PF3D7_1469100;size=783;Alias=124810302,PF14_0659,23497734,AAN37272.1,XP_001348833.1,Q8IKE6,PF3D7_1469100,812241,12368864,PF14_0659
0.00123604	0	0.00127877	0	Pf3D7_11_v3	82633	83415	ID=PF3D7_1101600;Name=PF3D7_1101600;description=Plasmodium+exported+protein+%28hyp4%29%2C+unknown+function;size=783;web_id=PF3D7_1101600;locus_tag=PF3D7_1101600;size=783;Alias=810570,2297.t00488,12368864,PF3D7_1101600,PF11_0024,PF11_0024
0.000266599	0	0.00128205	0	Pf3D7_06_v3	891997	892777	ID=PF3D7_0621800;Name=PF3D7_0621800;description=nascent+polypeptide+associated+complex+alpha+chain%2C+putative;size=781;web_id=PF3D7_0621800;locus_tag=PF3D7_0621800;size=781;Alias=46361167,PF3D7_0621800,MAL6P1.210,XP_966201.1,12368867,3885894,86171390,C6KT55,chapfold,PFF1050w,2270.t00108,CAG25031.1,PFF1050w
0.000264601	0	0.0012837	0	Pf3D7_07_v3	366929	367708	ID=PF3D7_0707900;Name=PF3D7_0707900;description=large+ribosomal+subunit+processing+protein%2C+putative;size=780;web_id=PF3D7_0707900;locus_tag=PF3D7_0707900;size=780;Alias=CAD50831.1,Q8IC10,2655196,riboMaturation,MAL7P1.24,Ribosomegenes,XP_001348993.1,124511720,23498761,PF3D7_0707900,MAL7P1.24
0.000316335	0	0.0012837	0	Pf3D7_14_v3	1932421	1933200	ID=PF3D7_1447100;Name=PF3D7_1447100;description=conserved+Plasmodium+protein%2C+unknown+function;size=780;web_id=PF3D7_1447100;locus_tag=PF3D7_1447100;size=780;Alias=124809608,XP_001348623.1,PF14_0449,PF14_0449,AAN37062.1,812031,Q8IL01,23497520,12368864,PF3D7_1447100
0.000376756	0	0.00128535	0	Pf3D7_13_v3	2263199	2264755	ID=PF3D7_1356900;Name=PF3D7_1356900;description=protein+kinase+5+%28PK5%29;size=1557;web_id=PF3D7_1356900;locus_tag=PF3D7_1356900;size=1557;Alias=Centriole,48425853,P61075.1,cont_micro_asse,P61075,MAL13P1.279,MAL13P1.279,CAA43923.1,PF3D7_1356900,584898,Protein_kinases,1OB3,9934,PK5,48425852,491582,replicationForm,XP_001350280.1,665968,1V0O,124513848,813841,46576367,centrosome,Q07785.1,23615697,CA…
0.00022144	0	0.001287	0	Pf3D7_06_v3	546964	547741	ID=PF3D7_0613400;Name=PF3D7_0613400;description=apicoplast+ribosomal+protein+L18+precursor%2C+putative;size=778;web_id=PF3D7_0613400;locus_tag=PF3D7_0613400;size=778;Alias=CAG25373.1,86170968,Q6LFD5.1,ribosomeStruct,XP_966121.1,3885756,12368867,46361086,PFF0650w,apicoplastgene,1236886,PFF0650w,Q6LFD5,2270.t00024,MAL6P1.291,PF3D7_0613400,73621541
0.000365131	0	0.001287	0	Pf3D7_06_v3	720535	721312	ID=PF3D7_0617300;Name=PF3D7_0617300;description=conserved+Plasmodium+protein%2C+unknown+function;size=778;web_id=PF3D7_0617300;locus_tag=PF3D7_0617300;size=778;Alias=PF3D7_0617300,86171168,PFF0840w,MAL6P1.253,PFF0840w,C6KT14,3885793,12368867,46361125,CAG24989.1,XP_966159.1,2270.t00062
0.00103717	0	0.001287	0	Pf3D7_03_v3	175022	175799	ID=PF3D7_0303300;Name=PF3D7_0303300;description=DNA-directed+RNA+polymerase+subunit+I%2C+putative;size=778;web_id=PF3D7_0303300;locus_tag=PF3D7_0303300;size=778;Alias=814350,O77315,10448855,12368867,PFC0155c,RNApolyI,225685549,296004344,MAL3P1.13,CAB10577.2,PF3D7_0303300,RNApolyStruct,XP_001351108.2,PFC0155c
0.00173283	0	0.001287	0	Pf3D7_04_v3	1058997	1060551	ID=PF3D7_0423500;Name=PF3D7_0423500;description=glideosome+associated+protein+with+multiple+membrane+spans+2+%28GAPM2%29;size=1555;web_id=PF3D7_0423500;locus_tag=PF3D7_0423500;size=1555;Alias=GAPM2,812442,Q8IFN1,12368867,23498297,PFD1110w,124505593,CAD49269.1,MAL4P1.217,linearMotor,PF3D7_0423500,XP_001351538.1,PFD1110w
0.00122015	0	0.00129282	0	Pf3D7_10_v3	277621	279168	ID=PF3D7_1006800;Name=PF3D7_1006800;description=RNA+binding+protein%2C+putative;size=1548;web_id=PF3D7_1006800;locus_tag=PF3D7_1006800;size=1548;Alias=124802073,12368864,810226,PF3D7_1006800,XP_001347353.1,PF10_0068,PF10_0068,23494932,AAN35266.1,Q8IJX3
0.000259396	0	0.0012945	0	Pf3D7_10_v3	848859	850404	ID=PF3D7_1021000;Name=PF3D7_1021000;description=conserved+Plasmodium+protein%2C+unknown+function;size=1546;web_id=PF3D7_1021000;locus_tag=PF3D7_1021000;size=1546;Alias=PF3D7_1021000,258597074,254922439,12368864,XP_001347488.2,AAN35401.2,Q8IJJ3,PF10_0204,PF10_0204,810361
0.00251159	0	0.0012987	0	Pf3D7_08_v3	767110	767880	ID=PF3D7_0816700;Name=PF3D7_0816700;description=conserved+Plasmodium+protein%2C+unknown+function;size=771;web_id=PF3D7_0816700;locus_tag=PF3D7_0816700;size=771;Alias=MAL8P1.77,MAL8P1.77,PF3D7_0816700,296005021,2655427,225632245,XP_002808850.1,C0H4V0,CAX64127.1
0.00267121	0	0.00131062	0	Pf3D7_04_v3	655025	657314	ID=PF3D7_0414500;Name=PF3D7_0414500;description=RNA+binding+protein%2C+putative;size=2290;web_id=PF3D7_0414500;locus_tag=PF3D7_0414500;size=2290;Alias=812564,P_body,Q8I1U3,12368867,PFD0675c,PFD0700c,MAL4P1.135,PF3D7_0414500,PFD0700c
0.000119347	0	0.00131148	0	Pf3D7_03_v3	870817	872342	ID=PF3D7_0320800;Name=PF3D7_0320800;description=ATP-dependent+RNA+helicase%2C+putative+%28DOZI%29;size=1526;web_id=PF3D7_0320800;locus_tag=PF3D7_0320800;size=1526;Alias=CCR4,DOZI,814522,O97285,P_body,4493972,10448855,12368867,PFC0915w,splicing,117956282,117956284,124505073,MAL3P7.12,ABK58709.1,ABK58710.1,CAB39031.1,PF3D7_0320800,XP_001351278.1,PFC0915w
4.87286e-05	0	0.00131579	0	Pf3D7_14_v3	1690993	1692513	ID=PF3D7_1441400;Name=PF3D7_1441400;description=FACT+complex+subunit+SSRP1%2C+putative%3Bwith%3DGeneDB%3APBANKA_130530+%28FACT-S%29;size=1521;web_id=PF3D7_1441400;locus_tag=PF3D7_1441400;size=1521;Alias=124809408,histone_chaperone,12368867,XP_001348567.1,PF3D7_1441400,811975,12368864,FACT-S,Q8IL56,23497463,NucleoAssembly,AAN37006.1,PF14_0393,hist_chap,PF14_0393
0.00168105	0	0.00131752	0	Pf3D7_05_v3	901414	902173	ID=PF3D7_0522200;Name=PF3D7_0522200;description=conserved+Plasmodium+protein%2C+unknown+function;size=760;web_id=PF3D7_0522200;locus_tag=PF3D7_0522200;size=760;Alias=23504708,PFE1110w,124506363,PFE1110w,Q8I3P1,XP_001351779.1,12368867,CAD51586.1,813037,PF3D7_0522200,MAL5P1.222
0.000531882	0	0.00132275	0	Pf3D7_12_v3	1581984	1582740	ID=PF3D7_1238000;Name=PF3D7_1238000;description=conserved+Plasmodium+membrane+protein%2C+unknown+function;size=757;web_id=PF3D7_1238000;locus_tag=PF3D7_1238000;size=757;Alias=23496902,12368864,Q8I543,124806623,PF12_0006,2277.t00368,PFL1840w,811420,AAN36454.1,PFL1840w,XP_001350774.1,PF3D7_1238000
0.00212665	0	0.00132275	0	Pf3D7_08_v3	977432	978188	ID=PF3D7_0821900;Name=PF3D7_0821900;description=conserved+Plasmodium+protein%2C+unknown+function;size=757;web_id=PF3D7_0821900;locus_tag=PF3D7_0821900;size=757;Alias=CAX64145.1,MAL8P1.50,2655349,225632264,XP_002808867.1,PF3D7_0821900,296005060,MAL8P1.50,C0H4W7
0.00109711	0	0.00132363	0	Pf3D7_13_v3	1047848	1049359	ID=PF3D7_1325200;Name=PF3D7_1325200;description=oxidoreductase%2C+putative;size=1512;web_id=PF3D7_1325200;locus_tag=PF3D7_1325200;size=1512;Alias=glycolysispath,PF13_0144,656750,XP_001349992.1,PF13_0144,CAD52400.1,23615409,124513272,Q8IE66,814115,PF3D7_1325200,654758,286458
0.000147642	0	0.0013245	0	Pf3D7_03_v3	219117	219872	ID=PF3D7_0304500;Name=PF3D7_0304500;description=1-cys-glutaredoxin-like+protein-1+%28GLP1%29;size=756;web_id=PF3D7_0304500;locus_tag=PF3D7_0304500;size=756;Alias=GLP1,814363,O97232,4493888,15193288,PFC0205c,124504757,MAL3P2.10,AAK00581.1,CAB38997.1,FeSProtein,comp_redox,nuclearGenes,redoxmetpath,PF3D7_0304500,XP_001351121.1,PFC0205c,thioredoxinpath,antioxidantSystem
0.000198812	0	0.00134108	0	Pf3D7_13_v3	2291897	2294134	ID=PF3D7_1357800;Name=PF3D7_1357800;description=TCP-1%2Fcpn60+chaperonin+family%2C+putative;size=2238;web_id=PF3D7_1357800;locus_tag=PF3D7_1357800;size=2238;Alias=12368867,protPV,225632029,813845,CAX64365.1,PF3D7_1357800,C0H5I7,centrosome,Pf_chaperones,MAL13P1.283,MAL13P1.283,XP_002809084.1,296005530
0.00111727	0	0.00134348	0	Pf3D7_08_v3	1229899	1232132	ID=PF3D7_0828600;Name=PF3D7_0828600;description=folate+transporter+1+%28FT1%29;size=2234;web_id=PF3D7_0828600;locus_tag=PF3D7_0828600;size=2234;Alias=124512214,PF3D7_0828600,SHAMTandGCV,23499009,MAL8P1.13,12368867,MAL8P1.13,transporters,PPM,Q8IBB7,XP_001349240.1,CAD51089.1,FT1,2655218
0.000269781	0	0.00134771	0	Pf3D7_14_v3	2912386	2915354	ID=PF3D7_1471200;Name=PF3D7_1471200;description=inorganic+anion+exchanger%2C+inorganic+anion+antiporter+%28SulP%29;size=2969;web_id=PF3D7_1471200;locus_tag=PF3D7_1471200;size=2969;Alias=PF14_0679,812261,PF14_0679,PF3D7_1471200,AAN37292.1,12368864,SulP,transporters,124810350,Q8IKC7,23497754,PPM,12368867,XP_001348853.1
4.95823e-05	0	0.00135135	0	Pf3D7_12_v3	1031825	1032565	ID=PF3D7_1225400;Name=PF3D7_1225400;description=conserved+Plasmodium+protein%2C+unknown+function;size=741;web_id=PF3D7_1225400;locus_tag=PF3D7_1225400;size=741;Alias=23496777,811297,PF3D7_1225400,AAN36331.1,PFL1225c,2277.t00245,124806183,MAL12P1.245,Q8I5G3,PFL1225c,12368864,XP_001350651.1
0.000634642	0	0.00137646	0	Pf3D7_09_v3	456959	461318	ID=PF3D7_0910100;Name=PF3D7_0910100;description=Ran-binding+protein%2C+putative;size=4360;web_id=PF3D7_0910100;locus_tag=PF3D7_0910100;size=4360;Alias=12368867,organizKinetochore,PFI0490c,PFI0490c,PF3D7_0910100,813378,225631812,296005189,import_export,XP_002808926.1,CAX64207.1,11738814,C0H530
0.00102471	0	0.00137931	0	Pf3D7_12_v3	2075792	2076517	ID=PF3D7_1250700;Name=PF3D7_1250700;description=conserved+Plasmodium+protein%2C+unknown+function;size=726;web_id=PF3D7_1250700;locus_tag=PF3D7_1250700;size=726;Alias=PFL2435w,Q8I4S7,811539,MAL12P1.485,23497021,PF3D7_1250700,2277.t00487,PFL2435w,XP_001350891.1,124807032,12368864,AAN36571.1
0.000185417	0	0.00137994	0	Pf3D7_13_v3	632336	634510	ID=PF3D7_1314900;Name=PF3D7_1314900;description=TFIIH+basal+transcription+factor+subunit;size=2175;web_id=PF3D7_1314900;locus_tag=PF3D7_1314900;size=2175;Alias=MAL13P1.76,RNApolyII,excisionrepair,Q8IEG6,XP_001349885.1,124513058,23615302,ExcisionRepairTab,MAL13P1.76,813966,PF3D7_1314900,CAD52293.1
0.0013628	0	0.00138122	0	Pf3D7_14_v3	1929931	1931379	ID=PF3D7_1447000;Name=PF3D7_1447000;description=40S+ribosomal+protein+S2%2C+putative;size=1449;web_id=PF3D7_1447000;locus_tag=PF3D7_1447000;size=1449;Alias=ribosomeStruct,XP_001348622.1,PF3D7_1447000,12368864,PF14_0448,PF14_0448,Q8IL02,12368867,812030,23497519,124809606,AAN37061.1
0.00250656	0	0.00138217	0	Pf3D7_08_v3	1252349	1253796	ID=PF3D7_0829100;Name=PF3D7_0829100;description=conserved+protein%2C+unknown+function;size=1448;web_id=PF3D7_0829100;locus_tag=PF3D7_0829100;size=1448;Alias=XP_002808885.1,296005100,2655215,C0H4Y8,CAX64163.1,MAL8P1.10,MAL8P1.10,225632284,PF3D7_0829100
0.000309179	0	0.00138889	0	Pf3D7_14_v3	1885443	1888323	ID=PF3D7_1445900;Name=PF3D7_1445900;description=DEAD%2FDEAH+box+ATP-dependent+RNA+helicase%2C+putative;size=2881;web_id=PF3D7_1445900;locus_tag=PF3D7_1445900;size=2881;Alias=PF14_0437,PF14_0437,812019,XP_001348611.2,12368864,PF14_0436,AAN37050.2,258597823,splicing,255528866,PF3D7_1445900,Q8IL13
0.000666779	0	0.0013947	0	Pf3D7_13_v3	730859	732293	ID=PF3D7_1317300;Name=PF3D7_1317300;description=conserved+Plasmodium+protein%2C+unknown+function;size=1435;web_id=PF3D7_1317300;locus_tag=PF3D7_1317300;size=1435;Alias=CAD52317.1,PF13_0098,124513106,PF3D7_1317300,814074,Q8IEE3,23615326,XP_001349909.1,PF13_0098
8.33957e-05	0	0.00139535	0	Pf3D7_05_v3	743179	745329	ID=PF3D7_0517700;Name=PF3D7_0517700;description=eukaryotic+translation+initiation+factor%2C+putative;size=2151;web_id=PF3D7_0517700;locus_tag=PF3D7_0517700;size=2151;Alias=PF3D7_0517700,MAL5P1.177,PFE0885w,Q8I3T1,23504663,XP_001351734.1,12368867,CAD51541.1,intTranslation,PFE0885w,124506273,812992
0.00127376	0	0.00139762	0	Pf3D7_11_v3	1824148	1825579	ID=PF3D7_1146100;Name=PF3D7_1146100;description=conserved+Plasmodium+protein%2C+unknown+function;size=1432;web_id=PF3D7_1146100;locus_tag=PF3D7_1146100;size=1432;Alias=254832727,258597426,XP_001348139.2,PF11_0472,811015,PF11_0472,Q8IHQ7,PF3D7_1146100,12368864,AAN36052.2
0.00127019	0	0.00140647	0	Pf3D7_08_v3	378024	379446	ID=PF3D7_0807200;Name=PF3D7_0807200;description=conserved+Plasmodium+membrane+protein%2C+unknown+function;size=1423;web_id=PF3D7_0807200;locus_tag=PF3D7_0807200;size=1423;Alias=MAL8P1.130,CAX64102.1,2655219,PF3D7_0807200,XP_002808825.1,225632217,MAL8P1.130,296004963,C0H4S6
0.000386193	0	0.00141643	0	Pf3D7_01_v3	430152	430858	ID=PF3D7_0111200;Name=PF3D7_0111200;description=conserved+Plasmodium+protein%2C+unknown+function;size=707;web_id=PF3D7_0111200;locus_tag=PF3D7_0111200;size=707;Alias=23510683,PFA0540c,124505853,MAL1P2.37,CAD49068.1,PF3D7_0111200,XP_001351040.1,PFA0540c
0.00157135	0	0.00142045	0	Pf3D7_12_v3	2183464	2184168	ID=PF3D7_1253500;Name=PF3D7_1253500;description=Plasmodium+exported+protein%2C+unknown+function;size=705;web_id=PF3D7_1253500;locus_tag=PF3D7_1253500;size=705;Alias=2277.t00513,MAL12P1.510,PFL2575c,XP_001350917.1,23497047,Q8I4Q2,11738814,AAN36597.1,PFL2575c,12368864,124807134,811565,PF3D7_1253500
0.00182395	0	0.00143472	0	Pf3D7_11_v3	570017	570714	ID=PF3D7_1115000;Name=PF3D7_1115000;description=conserved+Plasmodium+protein%2C+unknown+function;size=698;web_id=PF3D7_1115000;locus_tag=PF3D7_1115000;size=698;Alias=PF11_0159,PF11_0159,23496082,AAN35743.1,Q8IIL2,12368864,810706,124803840,PF3D7_1115000,XP_001347830.1
0.00141389	0	0.00144718	0	Pf3D7_11_v3	1053642	1054333	ID=PF3D7_1126900;Name=PF3D7_1126900;description=small+nuclear+ribonucleoprotein+F%2C+putative+%28SNRPF%29;size=692;web_id=PF3D7_1126900;locus_tag=PF3D7_1126900;size=692;Alias=254832663,splicing,810827,PF3D7_1126900,AAN35864.2,PF11_0280,XP_001347951.2,PF11_0280,12368864,Q8II94,258597322,SNRPF
5.32524e-05	0	0.00145138	0	Pf3D7_04_v3	689640	690329	ID=PF3D7_0415600;Name=PF3D7_0415600;description=adenylate+kinase+%28GAK%29;size=690;web_id=PF3D7_0415600;locus_tag=PF3D7_0415600;size=690;Alias=GAK,662798,812591,Q8I1T1,14280008,23498222,PFD0755c,124505445,AAK58841.1,CAD49193.1,MAL4P1.146,nuclearGenes,PF3D7_0415600,purinemetpath,XP_001351464.1,PFD0755c
5.34853e-05	0	0.00145773	0	Pf3D7_14_v3	3085496	3086182	ID=PF3D7_1475300;Name=PF3D7_1475300;description=cytochrome+c+oxidase+assembly+protein%2C+putative;size=687;web_id=PF3D7_1475300;locus_tag=PF3D7_1475300;size=687;Alias=Q8IK85,AAN37334.1,812303,XP_001348895.1,PF14_0721,PF3D7_1475300,12368867,PF14_0721,apicoplastgene,12368864,mitochondrionef,23497797,124810497,BiogenesisCytochromeOxidase,nuclearGenes
5.35634e-05	0	0.00145985	0	Pf3D7_05_v3	653966	655336	ID=PF3D7_0515700;Name=PF3D7_0515700;description=glideosome-associated+protein+40%2C+putative+%28GAP40%29;size=1371;web_id=PF3D7_0515700;locus_tag=PF3D7_0515700;size=1371;Alias=12368867,PF3D7_0515700,XP_001351714.1,Q8I3V1,transporters,CAD51521.1,23504642,PFE0785c,GAP40,124506233,812971,PFE0785c,MAL5P1.157,linearMotor
5.37202e-05	0	0.00146413	0	Pf3D7_03_v3	612739	613422	ID=PF3D7_0315100;Name=PF3D7_0315100;description=translation+initiation+factor+4E+%28eIF4E%29;size=684;web_id=PF3D7_0315100;locus_tag=PF3D7_0315100;size=684;Alias=eIF4E,814464,O97266,P_body,4493941,10448855,12368867,17692399,19751846,PFC0635c,117371500,124504957,MAL3P5.13,ABK33668.1,CAB38977.1,PF3D7_0315100,Pviv007946AAA,XP_001351220.1,PFC0635c,intTranslation
5.3799e-05	0	0.00146628	0	Pf3D7_12_v3	932917	934281	ID=PF3D7_1223200;Name=PF3D7_1223200;description=conserved+Plasmodium+protein%2C+unknown+function;size=1365;web_id=PF3D7_1223200;locus_tag=PF3D7_1223200;size=1365;Alias=MAL12P1.223,124806108,811275,12368864,AAN36309.1,PFL1115w,XP_001350629.1,2277.t00223,Q8I5I4,PFL1115w,PF3D7_1223200,23496754
0.000946289	0	0.00146628	0	Pf3D7_09_v3	1287008	1288372	ID=PF3D7_0932200;Name=PF3D7_0932200;description=profilin%2C+putative+%28PFN%29;size=1365;web_id=PF3D7_0932200;locus_tag=PF3D7_0932200;size=1365;Alias=124507183,23505219,Q8I2J4,813593,CAD51999.1,actin,PF3D7_0932200,PFI1565w,Q8I2J4.1,PFN,XP_001352188.1,linearMotor,PFI1565w,74862044
0.00123429	0	0.00146699	0	Pf3D7_14_v3	447923	449968	ID=PF3D7_1411100.1;Name=PF3D7_1411100.1;description=conserved+Plasmodium+membrane+protein%2C+unknown+function;size=2046;web_id=PF3D7_1411100.1;locus_tag=PF3D7_1411100.1;size=2046;Alias=PF14_0778,PF3D7_1411100.1,12368864,258549182,AAN36721.2,PF14_0778,811690,Q8ILY4,XP_001348282.2,255528770
0.00123429	0	0.00146699	0	Pf3D7_14_v3	447923	449968	ID=PF3D7_1411100.2;Name=PF3D7_1411100.2;description=conserved+Plasmodium+membrane+protein%2C+unknown+function;size=2046;web_id=PF3D7_1411100.2;locus_tag=PF3D7_1411100.2;size=2046;Alias=PF3D7_1411100.2,PF14_0778
0.000686748	0	0.00147059	0	Pf3D7_03_v3	611334	612014	ID=PF3D7_0315000;Name=PF3D7_0315000;description=zinc+finger+protein%2C+putative;size=681;web_id=PF3D7_0315000;locus_tag=PF3D7_0315000;size=681;Alias=814463,O97265,4493940,10448855,12368867,PFC0630w,124504955,MAL3P5.12,CAB38976.1,PF3D7_0315000,XP_001351219.1,PFC0630w
0.000654534	0	0.0014782	0	Pf3D7_13_v3	1720319	1721672	ID=PF3D7_1343500;Name=PF3D7_1343500;description=conserved+Plasmodium+protein%2C+unknown+function;size=1354;web_id=PF3D7_1343500;locus_tag=PF3D7_1343500;size=1354;Alias=23615573,124513600,XP_001350156.1,MAL13P1.217,PF3D7_1343500,CAD52565.1,11738814,813774,MAL13P1.217,Q8IDQ4
0.000661153	0	0.00150602	0	Pf3D7_06_v3	768792	769456	ID=PF3D7_0618300;Name=PF3D7_0618300;description=60S+ribosomal+protein+L27a%2C+putative;size=665;web_id=PF3D7_0618300;locus_tag=PF3D7_0618300;size=665;Alias=PFF0885w,3885802,MAL6P1.244,C6KT23,ribosomeStruct,46361134,2270.t00071,XP_966168.1,86171217,PFF0885w,12368867,CAG24998.1,PF3D7_0618300
0.00113565	0	0.0015083	0	Pf3D7_01_v3	293642	294968	ID=PF3D7_0107000;Name=PF3D7_0107000;description=centrin-1+%28CEN1%29;size=1327;web_id=PF3D7_0107000;locus_tag=PF3D7_0107000;size=1327;Alias=CEN1,23510644,PFA0345w,124505775,Centriole,MAL1P1.61,CAD49029.1,PF3D7_0107000,mitoticCentro,XP_001351001.1,PFA0345w
0.000808939	0	0.00150943	0	Pf3D7_13_v3	1911507	1912832	ID=PF3D7_1347800;Name=PF3D7_1347800;description=leucine-rich+repeat+protein+%28LRR4.1%29;size=1326;web_id=PF3D7_1347800;locus_tag=PF3D7_1347800;size=1326;Alias=LRR4.1,XP_001350191.1,62548880,MAL13P1.238,813797,23615608,PF3D7_1347800,CAD52600.1,MAL13P1.238,Q8IDM1,124513670,AAX86879.1
0.000109752	0	0.00152439	0	Pf3D7_11_v3	511105	511761	ID=PF3D7_1113100;Name=PF3D7_1113100;description=protein+tyrosine+phosphatase+%28PRL%29;size=657;web_id=PF3D7_1113100;locus_tag=PF3D7_1113100;size=657;Alias=PRL,57164662,124803770,23496062,XP_001347810.1,AAN35723.1,PF11_0139,Phos_tmd_exprs,AAW34267.1,phosphorylation,PF11_0139,Q8IIN1,810686,PF3D7_1113100
0.000214208	0	0.00152614	0	Pf3D7_07_v3	395711	398332	ID=PF3D7_0708800;Name=PF3D7_0708800;description=heat+shock+protein+70+%28HSP70-z%29;size=2622;web_id=PF3D7_0708800;locus_tag=PF3D7_0708800;size=2622;Alias=chapfold,XP_001349002.1,PF07_0033,centrosome,23498770,PF07_0033,CAD50840.1,Q8IC01,Pf_chaperones,PF3D7_0708800,2655069,124511738,HSP70-z
0.000958865	0	0.00152672	0	Pf3D7_05_v3	838428	839083	ID=PF3D7_0520300;Name=PF3D7_0520300;description=U6+snRNA-associated+sm-like+protein+lsm2%2C+putative+%28LSM2%29;size=656;web_id=PF3D7_0520300;locus_tag=PF3D7_0520300;size=656;Alias=23504690,PFE1020w,12368867,813019,Q8I3Q7,PF3D7_0520300,splicing,mRNAdeg,LSM2,CAD51568.1,MAL5P1.204,PFE1020w,124506327,Factors,XP_001351761.1,P_body
0.000825488	0	0.00152905	0	Pf3D7_06_v3	1095065	1096373	ID=PF3D7_0627200;Name=PF3D7_0627200;description=myosin+light+chain%2C+putative;size=1309;web_id=PF3D7_0627200;locus_tag=PF3D7_0627200;size=1309;Alias=C6KTA8,296004728,225631770,MAL6P1.156,PFF1320c,2270.t00159,molecularMotor,PF3D7_0627200,XP_966255.2,CAG25085.2,12368867,3885765,PFF1320c
5.61452e-05	0	0.00153022	0	Pf3D7_12_v3	2002723	2004030	ID=PF3D7_1248900;Name=PF3D7_1248900;description=tat-binding+protein+homolog;size=1308;web_id=PF3D7_1248900;locus_tag=PF3D7_1248900;size=1308;Alias=12368867,124806952,AAN36553.1,proteasome_new,PF3D7_1248900,MAL12P1.468,PFL2345c,Q8I4U5,23497002,proteaUbiqpath,PFL2345c,12368864,XP_001350873.1,811521,2277.t00469
0.000679402	0	0.00153218	0	Pf3D7_04_v3	323267	325225	ID=PF3D7_0406100;Name=PF3D7_0406100;description=vacuolar+ATP+synthase+subunit+b;size=1959;web_id=PF3D7_0406100;locus_tag=PF3D7_0406100;size=1959;Alias=PPM,516490,812397,Q6ZMA8,2493125,7935619,12368867,23498182,PFD0300c,PFD0305c,Q25691.1,124505265,MAL4P1.60,AAA20218.1,CAD49154.1,transporters,PF3D7_0406100,ERGolgiVacuole,XP_001351374.1,PFD0305c
5.64475e-05	0	0.00153846	0	Pf3D7_12_v3	621125	621775	ID=PF3D7_1215000;Name=PF3D7_1215000;description=thioredoxin+peroxidase+2+%28Trx-Px2%29;size=651;web_id=PF3D7_1215000;locus_tag=PF3D7_1215000;size=651;Alias=AAK20024.1,AAN36234.1,2277.t00146,13357166,XP_001350554.1,23496678,comp_redox,MAL12P1.145,nuclearGenes,antioxidantSystem,PFL0725w,Pviv009121AAA,thioredoxinpath,Trx-Px2,Q8I5Q6,124805845,redoxmetpath,PF3D7_1215000,2C0D,PFL0725w,811198
0.00041681	0	0.00154321	0	Pf3D7_13_v3	2609933	2610581	ID=PF3D7_1365100;Name=PF3D7_1365100;description=mitochondrial+ribosomal+protein+S17+precursor%2C+putative;size=649;web_id=PF3D7_1365100;locus_tag=PF3D7_1365100;size=649;Alias=12368867,ribosomeStruct,124514012,Q8ID56,nuclearGenes,PF3D7_1365100,MAL13P1.327,813893,23615779,MAL13P1.327,CAD52771.1,XP_001350362.1
0.000811437	0	0.00155039	0	Pf3D7_08_v3	631584	632229	ID=PF3D7_0812600;Name=PF3D7_0812600;description=ubiquitin+conjugating+enzyme%2C+putative;size=646;web_id=PF3D7_0812600;locus_tag=PF3D7_0812600;size=646;Alias=proteasome_new,CAD51248.1,23499168,proteaUbiqpath,2655284,Q8IAW2,XP_001349399.1,PF3D7_0812600,PF08_0085,Pfal005333AAA,124512532,PF08_0085,12368867,PCNA_UB,DNA_transles
0.000411777	0	0.00155642	0	Pf3D7_14_v3	2570434	2571719	ID=PF3D7_1463200;Name=PF3D7_1463200;description=replication+factor+C3+%28RFC3%29;size=1286;web_id=PF3D7_1463200;locus_tag=PF3D7_1463200;size=1286;Alias=PF14_0601,12368864,12368867,ExcisionRepairTab,DNAgenes,PF3D7_1463200,23497675,Q8IKK4,124810138,AAG37985.1,excisionrepair,812183,XP_001348775.1,RFC3,AAN37214.1,11559500,PF14_0601,hist_chap
0.00320551	0	0.0015625	0	Pf3D7_13_v3	2214445	2215085	ID=PF3D7_1355800;Name=PF3D7_1355800;description=splicing+factor+3B+subunit+5%2C+putative+%28SF3B5%29;size=641;web_id=PF3D7_1355800;locus_tag=PF3D7_1355800;size=641;Alias=CAX64363.1,296005526,PF3D7_1355800,814259,PF13_0296,PF13_0296,splicing,C0H5I5,SF3B5,225632027,XP_002809082.1
0.00213137	0	0.00158228	0	Pf3D7_03_v3	677842	678474	ID=PF3D7_0316800;Name=PF3D7_0316800;description=40S+ribosomal+protein+S15A%2C+putative;size=633;web_id=PF3D7_0316800;locus_tag=PF3D7_0316800;size=633;Alias=814482,O77395,3758866,10448855,12368867,PFC0735w,124504993,MAL3P6.30,CAB11151.1,PF3D7_0316800,XP_001351238.1,PFC0735w,ribosomeStruct
0.000115012	0	0.00159744	0	Pf3D7_04_v3	686414	687040	ID=PF3D7_0415400;Name=PF3D7_0415400;description=nonclathrin+coat+protein+zeta2-cop-related+protein%2C+putative;size=627;web_id=PF3D7_0415400;locus_tag=PF3D7_0415400;size=627;Alias=COPI,812554,Q8I1T3,12368867,23498220,PFD0745c,124505441,CAD49191.1,MAL4P1.144,PF3D7_0415400,Pviv008190AAA,sub_loc_adapt,XP_001351462.1,PFD0745c
0.000236361	0	0.0016	0	Pf3D7_09_v3	913230	914480	ID=PF3D7_0922500;Name=PF3D7_0922500;description=phosphoglycerate+kinase+%28PGK%29;size=1251;web_id=PF3D7_0922500;locus_tag=PF3D7_0922500;size=1251;Alias=PFI1105w,XP_001352096.1,glycolysispath,AAA29727.1,Pfal008831AAA,661242,P27362.1,124506998,CAD51907.1,PFI1105w,813501,160592,PF3D7_0922500,642238,129926,protPV,PGK,23505125,P27362
0.000115565	0	0.00160514	0	Pf3D7_05_v3	585357	585980	ID=PF3D7_0513800;Name=PF3D7_0513800;description=Rab+GTPase+1a+%28RAB1a%29;size=624;web_id=PF3D7_0513800;locus_tag=PF3D7_0513800;size=624;Alias=AAF15358.1,rabIntracellular,6525224,PF3D7_0513800,Q8I3W9,CAD51503.1,124506197,proteins,PFE0690c,MAL5P1.139,23504624,PFE0690c,RAB1a,er_golgi_tr_qa,XP_001351696.1,812953,rabCycle
0.00173247	0	0.00161486	0	Pf3D7_06_v3	1056052	1058529	ID=PF3D7_0626100;Name=PF3D7_0626100;description=oxidoreductase%2C+short-chain+dehydrogenase+family%2C+putative;size=2478;web_id=PF3D7_0626100;locus_tag=PF3D7_0626100;size=2478;Alias=C6KT97,XP_966244.1,PFF1265w,2270.t00148,MAL6P1.167,3885994,nuclearGenes,pyruvatemetpath,PFF1265w,86171603,PF3D7_0626100,12368867,CAG25074.1,46361213
0.000443029	0	0.00161812	0	Pf3D7_10_v3	475327	476563	ID=PF3D7_1012400;Name=PF3D7_1012400;description=hypoxanthine-guanine+phosphoribosyltransferase+%28HGPRT%29;size=1237;web_id=PF3D7_1012400;locus_tag=PF3D7_1012400;size=1237;Alias=638414,PF3D7_1012400,23494985,12368864,PF10_0121,HGPRT,purinemetpath,638416,660798,810279,661691,XP_001347406.1,124802223,638160,PF10_0121,AAN35319.1,Q8IJS1,638388,MCprot
7.44237e-05	0	0.00162272	0	Pf3D7_12_v3	883567	886032	ID=PF3D7_1222300;Name=PF3D7_1222300;description=endoplasmin+homolog+precursor%2C+putative;size=2466;web_id=PF3D7_1222300;locus_tag=PF3D7_1222300;size=2466;Alias=protER,Q8I0V4,chapfold,PF3D7_1222300,MCprot,12368864,811266,2277.t00214,PFL1070c,Pf_chaperones,AAN36300.1,23496745,12368867,XP_001350620.1,PFL1070c,124806075,protPV,MAL12P1.214
0.000302229	0	0.00162338	0	Pf3D7_07_v3	938279	938895	ID=PF3D7_0721800;Name=PF3D7_0721800;description=conserved+Plasmodium+protein%2C+unknown+function;size=617;web_id=PF3D7_0721800;locus_tag=PF3D7_0721800;size=617;Alias=PF3D7_0721800,CAD50966.1,MAL7P1.117,124511974,XP_001349120.1,MAL7P1.117,23498888,2655183,Q8IBN3
0.000823474	0	0.00163043	0	Pf3D7_08_v3	208451	210291	ID=PF3D7_0803300;Name=PF3D7_0803300;description=mitogen-activated+protein+kinase+organizer+1%2C+putative+%28PfMORG1%29;size=1841;web_id=PF3D7_0803300;locus_tag=PF3D7_0803300;size=1841;Alias=Protein_kinases,Q8IAN3,MAL8P1.145,CAD51330.1,2655370,PfMORG1,MAL8P1.145,23499250,XP_001349481.1,PF3D7_0803300,124512696
0.000719062	0	0.00163934	0	Pf3D7_09_v3	1027094	1027704	ID=PF3D7_0925600;Name=PF3D7_0925600;description=zinc+binding+protein+%28Yippee%29%2C+putative;size=611;web_id=PF3D7_0925600;locus_tag=PF3D7_0925600;size=611;Alias=Q8I2Q2,PFI1255w,CAD51937.1,12368867,813531,PF3D7_0925600,124507058,XP_001352126.1,23505156,PFI1255w
0.00184033	0	0.00164384	0	Pf3D7_09_v3	133762	135587	ID=PF3D7_0903200;Name=PF3D7_0903200;description=Rab+GTPase+7+%28Rab7%29;size=1826;web_id=PF3D7_0903200;locus_tag=PF3D7_0903200;size=1826;Alias=813311,Q9NFG0,rabIntracellular,endos_mat,13509187,import_export,CAB92946.2,225631795,PFI0155c,296005155,proteins,AJ90938,Rab7,PFI0155c,PF3D7_0903200,CAX64193.1,C0H516,XP_002808912.1,rabCycle
0.00276084	0	0.00164474	0	Pf3D7_06_v3	507678	508286	ID=PF3D7_0612000;Name=PF3D7_0612000;description=conserved+Plasmodium+protein%2C+unknown+function;size=609;web_id=PF3D7_0612000;locus_tag=PF3D7_0612000;size=609;Alias=PFF0585c,CAG25360.1,12368867,C6KSW4,XP_966108.1,86170903,46361073,3885928,MAL6P1.305,PFF0585c,2270.t00014,PF3D7_0612000
0.00126537	0	0.00164745	0	Pf3D7_13_v3	887271	889699	ID=PF3D7_1321400;Name=PF3D7_1321400;description=DHHC-type+zinc+finger+protein%2C+putative;size=2429;web_id=PF3D7_1321400;locus_tag=PF3D7_1321400;size=2429;Alias=23615370,124513194,XP_001349953.1,813665,Q8IEA0,MAL13P1.117,PF3D7_1321400,MAL13P1.117,CAD52361.1
0.000888952	0	0.00165107	0	Pf3D7_05_v3	963227	965044	ID=PF3D7_0523100;Name=PF3D7_0523100;description=mitochondrial+processing+peptidase+alpha+subunit%2C+putative;size=1818;web_id=PF3D7_0523100;locus_tag=PF3D7_0523100;size=1818;Alias=12368867,AAL49970.1,proteases,importMito,XP_001351788.2,PFE1155c,225631698,813046,CAD51595.2,296004584,21591792,MAL5P1.231,PFE1155c,PF3D7_0523100,nuclearGenes,Q8I3N3
0.000144989	0	0.00165563	0	Pf3D7_09_v3	903362	904570	ID=PF3D7_0922200;Name=PF3D7_0922200;description=S-adenosylmethionine+synthetase+%28SAMS%29;size=1209;web_id=PF3D7_0922200;locus_tag=PF3D7_0922200;size=1209;Alias=AAG02013.1,PF3D7_0922200,23505122,SAMS,10129955,PFI1090w,XP_001352093.1,124506992,methioninemetpath,Q7K6A4,redoxReg,CAD51904.1,813498,AAG13449.1,9927542,Pfal008828AAA,PFI1090w
0.000487205	0	0.00165563	0	Pf3D7_06_v3	358391	360203	ID=PF3D7_0608700;Name=PF3D7_0608700;description=chaperone%2C+putative;size=1813;web_id=PF3D7_0608700;locus_tag=PF3D7_0608700;size=1813;Alias=Pf_chaperones,12368867,PF3D7_0608700,PFF0430w,MAL6P1.90,86170750,C6KST5,46361042,2270.t00226,XP_966077.1,centrosome,CAG25329.1,PFF0430w,tubulin,3885910
9.01976e-05	0	0.00165975	0	Pf3D7_14_v3	1021652	1022857	ID=PF3D7_1426200;Name=PF3D7_1426200;description=arginine+methyltransferase+1+%28PRMT1%29;size=1206;web_id=PF3D7_1426200;locus_tag=PF3D7_1426200;size=1206;Alias=12368864,23497310,12368867,arginine,AAN36855.1,Q8ILK1,PF3D7_1426200,chrom_mod_prot,PF14_0242,124808818,XP_001348416.1,PRMT1,PF14_0242,811824
0.000119597	0	0.00166113	0	Pf3D7_11_v3	746854	747456	ID=PF3D7_1119800;Name=PF3D7_1119800;description=alternative+splicing+factor+ASF-1%2C+putative+%28ASF1%29;size=603;web_id=PF3D7_1119800;locus_tag=PF3D7_1119800;size=603;Alias=PF3D7_1119800,XP_001347876.1,23496128,PF11_0205,Q8IIG9,splicing,PF11_0205,12368864,124804016,ASF1,AAN35789.1,810752
0.000881221	0	0.00166113	0	Pf3D7_06_v3	445761	446363	ID=PF3D7_0610500;Name=PF3D7_0610500;description=conserved+protein%2C+unknown+function;size=603;web_id=PF3D7_0610500;locus_tag=PF3D7_0610500;size=603;Alias=PFF0515c,3885921,MAL6P1.107,PF3D7_0610500,12368867,2270.t00210,46361059,CAG25346.1,XP_966094.1,C6KSV1,PFF0515c,86170836
0.00113176	0	0.00166667	0	Pf3D7_10_v3	147639	148239	ID=PF3D7_1003100;Name=PF3D7_1003100;description=conserved+Plasmodium+protein%2C+unknown+function;size=601;web_id=PF3D7_1003100;locus_tag=PF3D7_1003100;size=601;Alias=XP_002585397.1,ACT83885.1,254922376,PF3D7_1003100,PF10_0034,258549047
0.000216916	0	0.00167038	0	Pf3D7_11_v3	925728	927524	ID=PF3D7_1123400;Name=PF3D7_1123400;description=translation+elongation+factor+EF-1%2C+subunit+alpha%2C+putative;size=1797;web_id=PF3D7_1123400;locus_tag=PF3D7_1123400;size=1797;Alias=XP_001347916.1,PF11_0245,12368867,PF11_0245,proteinBiosynth,810792,124804150,PF3D7_1123400,12368864,qualityControl,23496169,Q8IIC9,AAN35829.1
0.000187024	0	0.00170358	0	Pf3D7_14_v3	1575984	1576571	ID=PF3D7_1438900;Name=PF3D7_1438900;description=thioredoxin+peroxidase+1+%28Trx-Px1%29;size=588;web_id=PF3D7_1438900;locus_tag=PF3D7_1438900;size=588;Alias=23497438,10180978,124809308,redoxReg,AAN36981.1,PF14_0368,thioredoxinpath,Q8IL80,comp_redox,XP_001348542.1,811950,7677316,8809674,PF14_0368,BAA97121.1,AAG14354.1,AAF67110.1,redoxmetpath,PF3D7_1438900,Trx-Px1
0.00210298	0	0.0017094	0	Pf3D7_12_v3	1218181	1218766	ID=PF3D7_1229700;Name=PF3D7_1229700;description=conserved+Plasmodium+protein%2C+unknown+function;size=586;web_id=PF3D7_1229700;locus_tag=PF3D7_1229700;size=586;Alias=254945390,PF3D7_1229700,XP_002585484.1,ACT90632.1,258549161,PFL1432c
6.28269e-05	0	0.00171233	0	Pf3D7_14_v3	244908	245492	ID=PF3D7_1406700;Name=PF3D7_1406700;description=phosphatase%2C+putative;size=585;web_id=PF3D7_1406700;locus_tag=PF3D7_1406700;size=585;Alias=PF3D7_1406700,124808126,XP_001348237.1,PF14_0064,AAN36676.1,largeTethering,811646,23497127,12368864,Pyoe003589AAA,Q8IM27,PF14_0064,sub_loc_adapt,Phos_tmd_exprs
6.37548e-05	0	0.00173762	0	Pf3D7_01_v3	260658	261809	ID=PF3D7_0106100;Name=PF3D7_0106100;description=vacuolar+ATP+synthase+subunit+c%2C+putative;size=1152;web_id=PF3D7_0106100;locus_tag=PF3D7_0106100;size=1152;Alias=PPM,23510635,PFA0300c,124505757,MAL1P1.52,CAD49020.1,transporters,PF3D7_0106100,ERGolgiVacuole,XP_001350992.1,PFA0300c
0.000352513	0	0.00173913	0	Pf3D7_11_v3	475880	476455	ID=PF3D7_1112400;Name=PF3D7_1112400;description=conserved+Plasmodium+protein%2C+unknown+function;size=576;web_id=PF3D7_1112400;locus_tag=PF3D7_1112400;size=576;Alias=124803737,AAN35715.1,XP_001347802.1,PF3D7_1112400,Q8IIN9,810678,PF11_0130,PF11_0130,23496053,12368864
0.000452129	0	0.00174825	0	Pf3D7_05_v3	123332	123904	ID=PF3D7_0502900;Name=PF3D7_0502900;description=mitochondrial+inner+membrane+TIM10+associated+protein%2C+putative;size=573;web_id=PF3D7_0502900;locus_tag=PF3D7_0502900;size=573;Alias=23504514,124505979,CAD51394.1,XP_001351587.1,812827,Q8I472,MAL5P1.29,PFE0140c,12368867,importMito,PF3D7_0502900,PFE0140c
0.00173286	0	0.00175131	0	Pf3D7_11_v3	989159	990301	ID=PF3D7_1125200;Name=PF3D7_1125200;description=conserved+Plasmodium+protein%2C+unknown+function;size=1143;web_id=PF3D7_1125200;locus_tag=PF3D7_1125200;size=1143;Alias=Q8IIB1,12368864,PF11_0263,810810,PF11_0263,PF3D7_1125200
6.5688e-05	0	0.00175747	0	Pf3D7_14_v3	2432177	2432746	ID=PF3D7_1459300;Name=PF3D7_1459300;description=conserved+protein%2C+unknown+function;size=570;web_id=PF3D7_1459300;locus_tag=PF3D7_1459300;size=570;Alias=812148,124810018,12368864,AAN37179.1,PF14_0566,PF14_0566,23497639,XP_001348740.1,PF3D7_1459300,Q8IKN8,11738814
0.000162062	0	0.00176056	0	Pf3D7_04_v3	870737	871873	ID=PF3D7_0419600;Name=PF3D7_0419600;description=ran+binding+protein+1%2C+putative;size=1137;web_id=PF3D7_0419600;locus_tag=PF3D7_0419600;size=1137;Alias=812489,P_body,Q76NN6,Q8WT07,12368867,17148533,23498262,PFD0950w,124505525,CAD12772.1,CAD49233.1,MAL4P1.185,centrosome,PF3D7_0419600,import_export,XP_001351504.1,PFD0950w,organizKinetochore
0.000864144	0	0.00176056	0	Pf3D7_13_v3	908503	909639	ID=PF3D7_1321800;Name=PF3D7_1321800;description=SFT2-like+protein%2C+putative;size=1137;web_id=PF3D7_1321800;locus_tag=PF3D7_1321800;size=1137;Alias=PF3D7_1321800,814095,XP_001349957.1,PF13_0124,Q8IE98,124513202,23615374,12368867,er_golgi_tr_qa,PF13_0124,CAD52365.1
0.00130412	0	0.00176211	0	Pf3D7_08_v3	729917	732187	ID=PF3D7_0815600;Name=PF3D7_0815600;description=eukaryotic+translation+initiation+factor%2C+putative;size=2271;web_id=PF3D7_0815600;locus_tag=PF3D7_0815600;size=2271;Alias=MAL8P1.83,intTranslation,Q8IAZ3,2655434,12368867,PF3D7_0815600,MAL8P1.83
0.0016477	0	0.00176367	0	Pf3D7_11_v3	398659	399226	ID=PF3D7_1110000;Name=PF3D7_1110000;description=conserved+Plasmodium+protein%2C+unknown+function;size=568;web_id=PF3D7_1110000;locus_tag=PF3D7_1110000;size=568;Alias=XP_002585425.1,PF11_0550,254832613,ACT82968.1,PF11_0550,8444944,12368864,PF3D7_1110000,C6S3E8,258549108
0.000376425	0	0.0017762	0	Pf3D7_12_v3	1941365	1942491	ID=PF3D7_1246800;Name=PF3D7_1246800;description=signal+recognition+particle+receptor%2C+beta+subunit+%28SRPR-beta%29;size=1127;web_id=PF3D7_1246800;locus_tag=PF3D7_1246800;size=1127;Alias=PFL2245w,124806868,XP_001350853.1,811501,Q8I4W4,SRPR-beta,23496982,PFL2245w,MAL12P1.448,12368864,2277.t00449,SRPmTargeting,PF3D7_1246800,AAN36533.1,apicoplastgene
0.00210165	0	0.00177778	0	Pf3D7_14_v3	2940478	2941603	ID=PF3D7_1472000;Name=PF3D7_1472000;description=pre-mRNA-splicing+factor+ISY1+homolog%2C+putative;size=1126;web_id=PF3D7_1472000;locus_tag=PF3D7_1472000;size=1126;Alias=XP_001348862.1,PF14_0688,PF14_0688,Q8IKB8,23497763,12368864,PF3D7_1472000,124810371,812270,splicing,AAN37301.1
6.55195e-05	0	0.00178571	0	Pf3D7_13_v3	2002429	2002989	ID=PF3D7_1349900;Name=PF3D7_1349900;description=conserved+Plasmodium+protein%2C+unknown+function;size=561;web_id=PF3D7_1349900;locus_tag=PF3D7_1349900;size=561;Alias=MAL13P1.251,813812,11738814,XP_001350212.1,Q8IDK0,CAD52621.1,PF3D7_1349900,23615629,124513712,MAL13P1.251
9.67309e-05	0	0.00178571	0	Pf3D7_12_v3	590194	592434	ID=PF3D7_1213800;Name=PF3D7_1213800;description=bifunctional+aminoacyl-tRNA+synthetase%2C+putative;size=2241;web_id=PF3D7_1213800;locus_tag=PF3D7_1213800;size=2241;Alias=XP_001350543.1,gen_phosph,AAN36223.1,12368867,2277.t00135,PFL0670c,PFL0670c,12368864,adenylyl,74862875,MAL12P1.134,811187,Q8I5R7.1,124805808,Q8I5R7,PF3D7_1213800,23496667,proteinBiosynth
0.00075072	0	0.00178678	0	Pf3D7_04_v3	1022487	1024166	ID=PF3D7_0422300;Name=PF3D7_0422300;description=alpha+tubulin+2;size=1680;web_id=PF3D7_0422300;locus_tag=PF3D7_0422300;size=1680;Alias=160108,812459,Q8IFP3,tubulin,12368867,23498285,PFD1050w,124505569,Centriole,AAA29498.1,CAD49257.1,MAL4P1.205,centrosome,Kinetochore,PF3D7_0422300,mitoticCentro,XP_001351526.1,PFD1050w,cont_micro_asse,microtubuleDynam
0.000856499	0	0.00180832	0	Pf3D7_10_v3	845086	846192	ID=PF3D7_1020900;Name=PF3D7_1020900;description=ADP-ribosylation+factor+%28ARF1%29;size=1107;web_id=PF3D7_1020900;locus_tag=PF3D7_1020900;size=1107;Alias=ARF1,23495068,124802497,XP_001347487.1,3182916,CAB02498.1,1565278,8954160,Q7KQL3,Q94650.3,PF3D7_1020900,PF10_0203,clathrintransport,PF10_0203,AAB63304.1,21045287,810360,3LRP,Q7KQL3.1,COPI,74876421,12368864,19171150,AAN35400.1,COPII,311772094,193…
6.65897e-05	0	0.00181488	0	Pf3D7_14_v3	2489698	2490249	ID=PF3D7_1461200;Name=PF3D7_1461200;description=mitochondrial+ribosomal+protein+S4%2FS9+precursor%2C+putative;size=552;web_id=PF3D7_1461200;locus_tag=PF3D7_1461200;size=552;Alias=PF14_0584,12368864,nuclearGenes,PF14_0584,12368867,Q8IKM0,812166,PF3D7_1461200,riboMaturation,Ribosomegenes,ribosomeStruct
0.000966246	0	0.00183318	0	Pf3D7_03_v3	862741	863832	ID=PF3D7_0320600;Name=PF3D7_0320600;description=conserved+Plasmodium+protein%2C+unknown+function;size=1092;web_id=PF3D7_0320600;locus_tag=PF3D7_0320600;size=1092;Alias=814520,Q9NFA1,8052278,10448855,12368867,PFC0911c,124505069,CAB92302.1,PF3D7_0320600,XP_001351276.1,PFC0911c
0.000562849	0	0.00183486	0	Pf3D7_06_v3	180936	181481	ID=PF3D7_0604200;Name=PF3D7_0604200;description=mitochondrial+ribosomal+protein+L41+precursor%2C+putative;size=546;web_id=PF3D7_0604200;locus_tag=PF3D7_0604200;size=546;Alias=PFF0205w,86170523,ribosomeStruct,3885841,MAL6P1.45,PFF0205w,XP_966032.1,PF3D7_0604200,46362274,C6KSP0,2270.t00271,12368867,CAG25212.1
0.000430009	0	0.00183936	0	Pf3D7_02_v3	537789	539420	ID=PF3D7_0213100;Name=PF3D7_0213100;description=heat+shock+protein+40%2C+putative;size=1632;web_id=PF3D7_0213100;locus_tag=PF3D7_0213100;size=1632;Alias=812719,O96212,3845226,9804551,12368864,12368867,PFB0595w,chapfold,124801221,PF02_0123,AAC71908.1,PF3D7_0213100,Pf_chaperones,XP_001349637.1,PFB0595w
0.00120109	0	0.00184843	0	Pf3D7_09_v3	445788	446329	ID=PF3D7_0909800;Name=PF3D7_0909800;description=small+nuclear+ribonucleoprotein+Sm+D3%2C+putative+%28SNRPD3%29;size=542;web_id=PF3D7_0909800;locus_tag=PF3D7_0909800;size=542;Alias=SNRPD3,12368867,CAX64206.1,813375,296005187,PFI0475w,PF3D7_0909800,XP_002808925.1,225631811,arginine,PFI0475w,C0H529
6.80722e-05	0	0.00185529	0	Pf3D7_03_v3	190180	190719	ID=PF3D7_0303600;Name=PF3D7_0303600;description=plasmoredoxin+%28Plrx%29;size=540;web_id=PF3D7_0303600;locus_tag=PF3D7_0303600;size=540;Alias=Plrx,814353,Q8I224,9392615,23477023,PFC0166w,redoxReg,124504737,AAF87222.1,CAD49085.1,comp_redox,redoxmetpath,PF3D7_0303600,XP_001351111.1,PFC0166w,thioredoxinpath
0.000347606	0	0.00189573	0	Pf3D7_13_v3	2154162	2155217	ID=PF3D7_1353900;Name=PF3D7_1353900;description=proteasome+subunit%2C+putative;size=1056;web_id=PF3D7_1353900;locus_tag=PF3D7_1353900;size=1056;Alias=Q8IDG2,MAL13P1.270,813832,XP_001350251.1,PF3D7_1353900,CAD52660.1,proteases,MAL13P1.270,124513790,23615668,proteasome_new,proteaUbiqpath
0.00104793	0	0.00191205	0	Pf3D7_14_v3	1012696	1014265	ID=PF3D7_1425900;Name=PF3D7_1425900;description=conserved+Plasmodium+protein%2C+unknown+function;size=1570;web_id=PF3D7_1425900;locus_tag=PF3D7_1425900;size=1570;Alias=PF3D7_1425900,258597724,XP_001348413.2,811821,PF14_0239,12368864,PF14_0239,AAN36852.2,255528811,Q8ILK4
7.0424e-05	0	0.00191939	0	Pf3D7_06_v3	1121690	1122211	ID=PF3D7_0628000;Name=PF3D7_0628000;description=6-pyruvoyltetrahydropterin+synthase+%28PTPS%29;size=522;web_id=PF3D7_0628000;locus_tag=PF3D7_0628000;size=522;Alias=PTPS,2270.t00167,C6KTB6,46361232,MAL6P1.148,86171703,Pviv004546AAA,PFF1360w,CAG25093.1,folatebiopath,XP_966263.1,PF3D7_0628000,PFF1360w,3885700
7.08319e-05	0	0.0019305	0	Pf3D7_14_v3	1216653	1217171	ID=PF3D7_1430900;Name=PF3D7_1430900;description=cytochrome+c+oxidase+subunit+II+precursor%2C+putative;size=519;web_id=PF3D7_1430900;locus_tag=PF3D7_1430900;size=519;Alias=124808998,XP_001348462.1,nuclearGenes,12368867,mitochondrionef,BiogenesisCytochromeOxidase,811870,AAN36901.1,PF14_0288,PF14_0288,PF3D7_1430900,Q8I6V2,12368864,23497356
0.000748405	0	0.00193798	0	Pf3D7_06_v3	222739	224287	ID=PF3D7_0605300;Name=PF3D7_0605300;description=serine%2Fthreonine+protein+kinase+%28ARK1%29;size=1549;web_id=PF3D7_0605300;locus_tag=PF3D7_0605300;size=1549;Alias=PF3D7_0605300,MAL6P1.56,C6KSQ1,86170581,PFF0260w,2270.t00261,46362285,CAG25223.1,3885701,phosphorylation,PFF0260w,XP_966043.1,12368867,ARK1,Protein_kinases
7.12445e-05	0	0.00194175	0	Pf3D7_14_v3	1018745	1019260	ID=PF3D7_1426100;Name=PF3D7_1426100;description=basic+transcription+factor+3b%2C+putative;size=516;web_id=PF3D7_1426100;locus_tag=PF3D7_1426100;size=516;Alias=PF14_0241,RNApolyIII,124808815,811823,23497309,PF3D7_1426100,AAN36854.1,Q8ILK2,12368867,12368864,chapfold,Pviv003740AAA,XP_001348415.1,PF14_0241
0.000299025	0	0.00194175	0	Pf3D7_14_v3	145134	145649	ID=PF3D7_1404100;Name=PF3D7_1404100;description=cytochrome+c%2C+putative;size=516;web_id=PF3D7_1404100;locus_tag=PF3D7_1404100;size=516;Alias=23497101,nuclearGenes,apoptosis,PF3D7_1404100,124808051,811620,XP_001348211.1,Q8IM53,mitochondrionef,PF14_0038,porphyrinmetpath,PF14_0038,12368867,AAN36650.1,12368864
7.13831e-05	0	0.00194553	0	Pf3D7_14_v3	1943936	1944964	ID=PF3D7_1447700;Name=PF3D7_1447700;description=conserved+Plasmodium+protein%2C+unknown+function;size=1029;web_id=PF3D7_1447700;locus_tag=PF3D7_1447700;size=1029;Alias=12368864,PF14_0453,23497524,124809616,AAN37066.1,Q8IKZ8,812035,XP_001348627.1,PF3D7_1447700,PF14_0453
7.205e-05	0	0.00194553	0	Pf3D7_05_v3	342205	343233	ID=PF3D7_0508300;Name=PF3D7_0508300;description=triose+phosphate+transporter+%28oTPT%29;size=1029;web_id=PF3D7_0508300;locus_tag=PF3D7_0508300;size=1029;Alias=isoprenoidmetpath,124506087,Q8I420,MAL5P1.84,XP_001351641.1,PFE0410w,23504568,mitochonApico,PF3D7_0508300,apicoplastgene,PFE0410w,transporters,oTPT,812861,CAD51448.1
7.16619e-05	0	0.00195312	0	Pf3D7_13_v3	1379109	1379621	ID=PF3D7_1333700;Name=PF3D7_1333700;description=histone+H3+variant%2C+putative+%28CenH3%29;size=513;web_id=PF3D7_1333700;locus_tag=PF3D7_1333700;size=513;Alias=PF13_0185,XP_001350068.1,acet_recog_mod,Histone,23615485,124513424,PF13_0185,CenH3,chromatin,arginine,Q8IDZ1,814155,CAD52476.1,organizKinetochore,NucleoAssembly,PF3D7_1333700
9.55812e-05	0	0.00197239	0	Pf3D7_13_v3	1843376	1844897	ID=PF3D7_1346100;Name=PF3D7_1346100;description=Sec61+alpha+subunit%2C+PfSec61+%28SEC61%29;size=1522;web_id=PF3D7_1346100;locus_tag=PF3D7_1346100;size=1522;Alias=SRPmTargeting,23615592,Q8IDN6,ProteasomeMeditated,813790,MAL13P1.231,124513638,PF13_0244,PF3D7_1346100,SEC61,eukaryotes,MAL13P1.231,CAD52584.1,XP_001350175.1
0.000604435	0	0.00200803	0	Pf3D7_14_v3	3023228	3023726	ID=PF3D7_1474100;Name=PF3D7_1474100;description=mitochondrial+ribosomal+protein+L20+precursor%2C+putative;size=499;web_id=PF3D7_1474100;locus_tag=PF3D7_1474100;size=499;Alias=PF3D7_1474100,nuclearGenes,XP_001348883.1,12368867,23497785,812291,ribosomeStruct,PF14_0709,PF14_0709,12368864,AAN37322.1,Q8IK97,124810452
7.52042e-05	0	0.00201207	0	Pf3D7_06_v3	845660	846157	ID=PF3D7_0620100;Name=PF3D7_0620100;description=conserved+Plasmodium+protein%2C+unknown+function;size=498;web_id=PF3D7_0620100;locus_tag=PF3D7_0620100;size=498;Alias=PFF0980w,296004700,PF3D7_0620100,225631756,MAL6P1.224,C6KT41,12368867,CAG25017.2,PFF0980w,XP_966187.2,2270.t00092,3885950
0.000761198	0	0.00202224	0	Pf3D7_13_v3	1849528	1850517	ID=PF3D7_1346300;Name=PF3D7_1346300;description=DNA%2FRNA-binding+protein+Alba+2+%28ALBA2%29;size=990;web_id=PF3D7_1346300;locus_tag=PF3D7_1346300;size=990;Alias=813792,124513642,Q8IDN4,P_body,ALBA2,XP_001350177.1,Histone,MAL13P1.233,PF3D7_1346300,MAL13P1.233,CAD52586.1,23615594
0.00012251	0	0.00202566	0	Pf3D7_06_v3	981066	982547	ID=PF3D7_0624000;Name=PF3D7_0624000;description=hexokinase+%28HK%29;size=1482;web_id=PF3D7_0624000;locus_tag=PF3D7_0624000;size=1482;Alias=12368867,PFF1155w,PFF1155w,MAL6P1.189,C6KT76,glycolysispath,CAG25052.1,86171490,HK,mannosemetpath,redoxReg,XP_966222.1,2270.t00126,3885912,46361188,PF3D7_0624000
0.000365843	0	0.00203943	0	Pf3D7_12_v3	608542	610013	ID=PF3D7_1214300;Name=PF3D7_1214300;description=geranylgeranyltransferase+type2+beta+subunit%2C+putative;size=1472;web_id=PF3D7_1214300;locus_tag=PF3D7_1214300;size=1472;Alias=MAL12P1.139,PF3D7_1214300,terpenoid,ACT90629.1,2277.t00140,prenylation,PFL0695c,PFL0695c,254945365,XP_002585481.1,Q8I5R2,258549155,12368864,811192
7.51863e-05	0	0.00204918	0	Pf3D7_14_v3	1407258	1407746	ID=PF3D7_1434700;Name=PF3D7_1434700;description=mitochondrial+import+inner+membrane+translocase+subunit+tim17%2C+putative;size=489;web_id=PF3D7_1434700;locus_tag=PF3D7_1434700;size=489;Alias=importMito,nuclearGenes,Q8ILB7,AAN36941.1,PF14_0328,PF14_0328,23497397,12368864,12368867,124809147,811910,XP_001348502.1,PF3D7_1434700
0.000217493	0	0.00205339	0	Pf3D7_10_v3	347206	348667	ID=PF3D7_1008400;Name=PF3D7_1008400;description=26S+proteasome+regulatory+subunit+4%2C+putative;size=1462;web_id=PF3D7_1008400;locus_tag=PF3D7_1008400;size=1462;Alias=Q8IJW0,810239,proteaUbiqpath,12368864,PF3D7_1008400,PF10_0081,258596995,AAN35279.2,254922393,proteasome_new,XP_001347366.2,PF10_0081,12368867,210601
0.000725327	0	0.00205761	0	Pf3D7_14_v3	1936888	1937374	ID=PF3D7_1447300;Name=PF3D7_1447300;description=mitochondrial+ribosomal+protein+S14+precursor%2C+putative;size=487;web_id=PF3D7_1447300;locus_tag=PF3D7_1447300;size=487;Alias=23497522,ribosomeStruct,12368864,PF14_0451,124809612,Q8I6V1,12368867,AAN37064.1,812033,prokaryotes,PF3D7_1447300,PF14_0451,XP_001348625.1,nuclearGenes
7.56513e-05	0	0.00206186	0	Pf3D7_12_v3	205491	205976	ID=PF3D7_1204300;Name=PF3D7_1204300;description=eukaryotic+translation+initiation+factor+5A+%28EIF5A%29;size=486;web_id=PF3D7_1204300;locus_tag=PF3D7_1204300;size=486;Alias=124805478,EIF5A,AAN36131.1,PFL0210c,21310117,23496573,12368864,Q8I603,AAM46152.1,PF3D7_1204300,PFL0210c,811095,proteinBiosynth,2277.t00042,MAL12P1.42,eiF5A,Pfal001782AAA,XP_001350451.1
0.000412651	0	0.00206612	0	Pf3D7_07_v3	673451	674419	ID=PF3D7_0715000;Name=PF3D7_0715000;description=4-nitrophenylphosphatase+%28PNPase%29;size=969;web_id=PF3D7_0715000;locus_tag=PF3D7_0715000;size=969;Alias=XP_001349053.1,PF07_0059,2655103,PF3D7_0715000,12368867,Q8IBV0,thiaminemetpath,CAD50898.1,23498821,124511840,PF07_0059,PNPase,vitaminB6metpath
7.61222e-05	0	0.00207469	0	Pf3D7_10_v3	1021292	1021774	ID=PF3D7_1024200;Name=PF3D7_1024200;description=RNA+binding+protein%2C+putative;size=483;web_id=PF3D7_1024200;locus_tag=PF3D7_1024200;size=483;Alias=AAN35432.1,PF10_0235,810392,Q8IJG3,12368864,PF3D7_1024200,23495101,XP_001347519.1,PF10_0235,124802582
0.000636348	0	0.00207756	0	Pf3D7_04_v3	449189	450633	ID=PF3D7_0409500;Name=PF3D7_0409500;description=conserved+Plasmodium+protein%2C+unknown+function;size=1445;web_id=PF3D7_0409500;locus_tag=PF3D7_0409500;size=1445;Alias=812389,C0H4A1,12368867,PFD0465c,225631632,296004412,MAL4P2.31,CAX63919.1,PF3D7_0409500,XP_002808649.1,PFD0465c,sphingometpath
0.00285165	0	0.002079	0	Pf3D7_05_v3	151422	152384	ID=PF3D7_0503800;Name=PF3D7_0503800;description=60S+ribosomal+protein+L31%2C+putative;size=963;web_id=PF3D7_0503800;locus_tag=PF3D7_0503800;size=963;Alias=XP_001351596.1,12368867,PFE0185c,ribosomeStruct,PF3D7_0503800,812922,CAD51403.1,Q8I463,PFE0185c,124505997,23504523,MAL5P1.38
7.68088e-05	0	0.00208044	0	Pf3D7_13_v3	2240970	2242412	ID=PF3D7_1356600;Name=PF3D7_1356600;description=regulator+of+chromosome+condensation%2C+putative;size=1443;web_id=PF3D7_1356600;locus_tag=PF3D7_1356600;size=1443;Alias=PF13_0303,124513842,23615694,814266,CAD52686.1,PF13_0303,Q8IDD6,exportin,PF3D7_1356600,XP_001350277.1,import_export
0.00025348	0	0.00208117	0	Pf3D7_11_v3	1248310	1250232	ID=PF3D7_1132200;Name=PF3D7_1132200;description=TCP-1%2Fcpn60+chaperonin+family%2C+putative;size=1923;web_id=PF3D7_1132200;locus_tag=PF3D7_1132200;size=1923;Alias=23496256,chapfold,810878,12368864,AAN35915.1,12368867,124804435,PF11_0331,PF11_0331,Q8II43,XP_001348002.1,centrosome,Pf_chaperones,PF3D7_1132200
0.00161001	0	0.00210379	0	Pf3D7_07_v3	732070	733496	ID=PF3D7_0716800;Name=PF3D7_0716800;description=eukaryotic+translation+initiation+factor+3+37.28+kDa+subunit%2C+putative;size=1427;web_id=PF3D7_0716800;locus_tag=PF3D7_0716800;size=1427;Alias=intTranslation,PF3D7_0716800,MAL7P1.81,Q8IBT2,23498839,2655045,124511876,MAL7P1.81,12368867,XP_001349071.1,CAD50916.1
0.00163917	0	0.00210748	0	Pf3D7_12_v3	1458233	1459182	ID=PF3D7_1234900;Name=PF3D7_1234900;description=conserved+Plasmodium+protein%2C+unknown+function;size=950;web_id=PF3D7_1234900;locus_tag=PF3D7_1234900;size=950;Alias=PF12_0003,PF3D7_1234900,AAN36423.1,PFL1685w,811389,Q8I573,12368864,PFL1685w,23496870,2277.t00337,124806511,XP_001350743.1
0.000580257	0	0.00211416	0	Pf3D7_02_v3	752966	753439	ID=PF3D7_0218500;Name=PF3D7_0218500;description=small+nuclear+ribonucleoprotein+Sm+D2%2C+putative+%28SNRPD2%29;size=474;web_id=PF3D7_0218500;locus_tag=PF3D7_0218500;size=474;Alias=812771,O96265,SNRPD2,3845296,9804551,12368864,12368867,PFB0865w,splicing,124801422,PF02_0175,AAC71962.1,PF3D7_0218500,XP_001349689.1,PFB0865w
7.87114e-05	0	0.0021254	0	Pf3D7_13_v3	2411357	2412298	ID=PF3D7_1360400;Name=PF3D7_1360400;description=conserved+Plasmodium+protein%2C+unknown+function;size=942;web_id=PF3D7_1360400;locus_tag=PF3D7_1360400;size=942;Alias=PF13_0319,23615732,CAD52724.1,XP_001350315.1,Q8IDA1,Pkno006615AAA,814281,PF3D7_1360400,PF13_0319,124513918
8.84723e-05	0	0.00214592	0	Pf3D7_11_v3	362421	362887	ID=PF3D7_1108300;Name=PF3D7_1108300;description=pterin-4a-carbinolamine+dehydratase+%28PCD%29;size=467;web_id=PF3D7_1108300;locus_tag=PF3D7_1108300;size=467;Alias=PF3D7_1108300,ACT82966.1,8444956,ABB53415.1,258549102,C6S3E6,DQ223776,PF11_0095a,80973348,PCD,PF11_0095a,254832607,XP_002585423.1
0.00250124	0	0.0021575	0	Pf3D7_13_v3	740527	741454	ID=PF3D7_1317800;Name=PF3D7_1317800;description=40S+ribosomal+protein+S15%2FS19%2C+putative;size=928;web_id=PF3D7_1317800;locus_tag=PF3D7_1317800;size=928;Alias=PF3D7_1317800,C0H5C2,813983,225631960,CAX64300.1,296005391,MAL13P1.92,XP_002809019.1,ribosomeStruct,MAL13P1.92,12368867
0.00237352	0	0.0021645	0	Pf3D7_09_v3	367865	368789	ID=PF3D7_0907900;Name=PF3D7_0907900;description=peptide+deformylase+%28PDF%29;size=925;web_id=PF3D7_0907900;locus_tag=PF3D7_0907900;size=925;Alias=apicoplastgene,813356,PDF,PFI0380c,11738814,12368867,PF3D7_0907900,124506707,Q8I372,CAD51762.1,XP_001351951.1,PFI0380c,23504979
0.00182109	0	0.00218818	0	Pf3D7_03_v3	524154	526439	ID=PF3D7_0312400;Name=PF3D7_0312400;description=glycogen+synthase+kinase+3+%28GSK3%29;size=2286;web_id=PF3D7_0312400;locus_tag=PF3D7_0312400;size=2286;Alias=GSK3,814439,MCprot,O77344,23476987,MAL3P4.8,PFC0525c,124504909,CAA15599.2,PF3D7_0312400,Pfal007922BAB,XP_001351197.1,PFC0525c,Protein_kinases,cont_micro_asse
0.000526611	0	0.00220994	0	Pf3D7_05_v3	839655	840560	ID=PF3D7_0520400;Name=PF3D7_0520400;description=conserved+Plasmodium+protein%2C+unknown+function;size=906;web_id=PF3D7_0520400;locus_tag=PF3D7_0520400;size=906;Alias=PFE1025c,XP_001351762.1,PF3D7_0520400,124506329,PFE1025c,813020,12368867,23504691,Q8I3Q6,MAL5P1.205,CAD51569.1
0.000380306	0	0.00221976	0	Pf3D7_05_v3	785664	786565	ID=PF3D7_0518900;Name=PF3D7_0518900;description=conserved+Plasmodium+protein%2C+unknown+function;size=902;web_id=PF3D7_0518900;locus_tag=PF3D7_0518900;size=902;Alias=PF3D7_0518900,CAD51554.1,PFE0950c,Q8I3S0,813005,23504676,PFE0950c,124506299,MAL5P1.190,XP_001351747.1,12368867
0.00110521	0	0.00222058	0	Pf3D7_03_v3	894761	896112	ID=PF3D7_0321400;Name=PF3D7_0321400;description=protein+kinase%2C+putative;size=1352;web_id=PF3D7_0321400;locus_tag=PF3D7_0321400;size=1352;Alias=C0H482,9221782,10448855,12368867,PFC0945w,MAL3P7.18,PF3D7_0321400,PFC0945w,Protein_kinases
0.00126083	0	0.00222883	0	Pf3D7_05_v3	607105	608451	ID=PF3D7_0514600;Name=PF3D7_0514600;description=ribose+5-phosphate+epimerase%2C+putative;size=1347;web_id=PF3D7_0514600;locus_tag=PF3D7_0514600;size=1347;Alias=MAL5P1.146,CAD51510.1,Pfal008434AAA,PFE0730c,PFE0730c,124506211,ppcpath,812960,XP_001351703.1,23504631,PF3D7_0514600,Q8I3W2,12368867
0.00170218	0	0.00224215	0	Pf3D7_10_v3	735921	736813	ID=PF3D7_1018500;Name=PF3D7_1018500;description=PHF5-like+protein%2C+putative;size=893;web_id=PF3D7_1018500;locus_tag=PF3D7_1018500;size=893;Alias=8445051,XP_002585408.1,C6S3D1,splicing,ACT83896.1,258549069,PF10_0179a,PF10_0179,254922427,PF3D7_1018500,12368864,PF10_0179a
0.00210466	0	0.00225225	0	Pf3D7_12_v3	1306524	1306968	ID=PF3D7_1231700;Name=PF3D7_1231700;description=conserved+Plasmodium+protein%2C+unknown+function;size=445;web_id=PF3D7_1231700;locus_tag=PF3D7_1231700;size=445;Alias=254945396,258549163,PF3D7_1231700,PFL1526c,ACT90633.1,12368864,8445024,PFL1526c,XP_002585485.1,C6S3K9
0.000516958	0	0.00226757	0	Pf3D7_10_v3	179344	180226	ID=PF3D7_1004000;Name=PF3D7_1004000;description=60S+ribosomal+protein+L13%2C+putative;size=883;web_id=PF3D7_1004000;locus_tag=PF3D7_1004000;size=883;Alias=12368867,ribosomeStruct,PF3D7_1004000,12368864,XP_001347328.1,AAN35241.1,124801997,PF10_0043,Q8IJZ7,PF10_0043,810201,23494906
0.000267472	0	0.00227101	0	Pf3D7_13_v3	1666832	1668153	ID=PF3D7_1342400;Name=PF3D7_1342400;description=casein+kinase+II+beta+chain+%28CK2beta2%29;size=1322;web_id=PF3D7_1342400;locus_tag=PF3D7_1342400;size=1322;Alias=XP_001350145.1,PF13_0232,23615562,Q8IDR5,814199,PF3D7_1342400,CAD52554.1,Protein_kinases,calmodulin,CK2beta2,124513578,PF13_0232
0.000239765	0	0.00228484	0	Pf3D7_13_v3	487511	488824	ID=PF3D7_1311400;Name=PF3D7_1311400;description=clathrin-adaptor+medium+chain%2C+putative;size=1314;web_id=PF3D7_1311400;locus_tag=PF3D7_1311400;size=1314;Alias=sub_loc_adapt,XP_001349842.1,clathrintransport,814040,12368867,PF13_0062,PF13_0062,23615259,124512972,Q8IEK4,PF3D7_1311400,CAD52249.1
0.00273925	0	0.00228659	0	Pf3D7_13_v3	2710406	2711718	ID=PF3D7_1368100;Name=PF3D7_1368100;description=proteasome+regulatory+subunit%2C+putative;size=1313;web_id=PF3D7_1368100;locus_tag=PF3D7_1368100;size=1313;Alias=12368867,MAL13P1.343,MAL13P1.343,proteaUbiqpath,23615808,Q8ID28,PF3D7_1368100,XP_001350391.1,proteasome_new,CAD52800.1,813911,124514070,proteases
8.39609e-05	0	0.00228833	0	Pf3D7_13_v3	820741	821178	ID=PF3D7_1319800;Name=PF3D7_1319800;description=probable+protein%2C+unknown+function;size=438;web_id=PF3D7_1319800;locus_tag=PF3D7_1319800;size=438;Alias=XP_001349934.1,813654,CAD52342.1,MAL13P1.106,MAL13P1.106,Q8IEB8,124513156,PF3D7_1319800,12368867,23615351
0.00108557	0	0.00228833	0	Pf3D7_09_v3	1346858	1347295	ID=PF3D7_0934200;Name=PF3D7_0934200;description=conserved+Plasmodium+protein%2C+unknown+function;size=438;web_id=PF3D7_0934200;locus_tag=PF3D7_0934200;size=438;Alias=124507221,XP_001352207.1,12368867,Q8I2H6,23505237,CAD52017.1,813611,PFI1655c,PF3D7_0934200,PFI1655c
0.000467107	0	0.00232019	0	Pf3D7_14_v3	2207027	2208320	ID=PF3D7_1453700;Name=PF3D7_1453700;description=co-chaperone+p23+%28P23%29;size=1294;web_id=PF3D7_1453700;locus_tag=PF3D7_1453700;size=1294;Alias=chapfold,255528889,P23,258597858,AAN37123.2,PF3D7_1453700,PF14_0510,Pf_chaperones,812092,telomerase,PF14_0510,XP_001348684.2,Q8IKU1
0.000102675	0	0.00233645	0	PFC10_API_IRAB	20722	21150	ID=PFC10_API0029;Name=PFC10_API0029;description=apicoplast+ribosomal+protein+S7+%28rps7%29;size=429;web_id=PFC10_API0029;locus_tag=PFC10_API0029;size=429;Alias=CAA64592.1,gen_apic_genom,prokaryotes,Rps7,PFC10_API0029,1171608,PFC10_API0029,rps7
0.00223453	0	0.00234742	0	Pf3D7_13_v3	150783	151635	ID=PF3D7_1302800;Name=PF3D7_1302800;description=40S+ribosomal+protein+S7%2C+putative;size=853;web_id=PF3D7_1302800;locus_tag=PF3D7_1302800;size=853;Alias=PF3D7_1302800,124512798,12368867,813993,ribosomeStruct,XP_001349755.1,PF13_0014,CAD52162.1,Q8IET7,PF13_0014,23615172
0.00249318	0	0.00236128	0	Pf3D7_10_v3	262150	262997	ID=PF3D7_1006200;Name=PF3D7_1006200;description=DNA%2FRNA-binding+protein+Alba+3+%28ALBA3%29;size=848;web_id=PF3D7_1006200;locus_tag=PF3D7_1006200;size=848;Alias=810221,XP_001347348.1,ALBA3,Q8IJX8,PF10_0063,AAN35261.1,P_body,PF3D7_1006200,124802054,12368864,23494927,PF10_0063,Histone
0.00114234	0	0.00238095	0	Pf3D7_10_v3	472546	473386	ID=PF3D7_1012300;Name=PF3D7_1012300;description=ubiquinol-cytochrome+c+reductase+complex+subunit%2C+putative;size=841;web_id=PF3D7_1012300;locus_tag=PF3D7_1012300;size=841;Alias=12368867,23494984,PF10_0120,PF10_0120,Q8IJS2,nuclearGenes,810278,AAN35318.1,XP_001347405.1,res_antimal,PF3D7_1012300,mitochondrionef,12368864,124802219
8.74634e-05	0	0.00238379	0	Pf3D7_12_v3	211517	212356	ID=PF3D7_1204500;Name=PF3D7_1204500;description=conserved+Plasmodium+protein%2C+unknown+function;size=840;web_id=PF3D7_1204500;locus_tag=PF3D7_1204500;size=840;Alias=12368864,AAN36134.1,PFL0225c,811098,23496576,PF3D7_1204500,Q8I600,124805488,XP_001350454.1,MAL12P1.45,PFL0225c,2277.t00046
8.75678e-05	0	0.00238663	0	Pf3D7_12_v3	1299608	1300027	ID=PF3D7_1231500;Name=PF3D7_1231500;description=DIM1+protein+homolog%2C+putative;size=420;web_id=PF3D7_1231500;locus_tag=PF3D7_1231500;size=420;Alias=23496837,12368864,Q8I5A5,MAL12P1.304,redoxmetpath,Ribosomegenes,124806392,XP_001350710.1,2277.t00304,riboMaturation,PFL1520w,12368867,PFL1520w,thioredoxinpath,AAN36390.1,PF3D7_1231500,811356
0.00157743	0	0.00241429	0	Pf3D7_09_v3	916603	918674	ID=PF3D7_0922600;Name=PF3D7_0922600;description=glutamine+synthetase%2C+putative;size=2072;web_id=PF3D7_0922600;locus_tag=PF3D7_0922600;size=2072;Alias=296005231,225631833,PFI1110w,glutamatemetpath,nitrogenmetpath,813502,PFI1110w,XP_002808947.1,CAX64228.1,PF3D7_0922600,12368867,C0H551
0.000224344	0	0.00241546	0	Pf3D7_10_v3	496331	497573	ID=PF3D7_1012900;Name=PF3D7_1012900;description=conserved+Plasmodium+protein%2C+unknown+function;size=1243;web_id=PF3D7_1012900;locus_tag=PF3D7_1012900;size=1243;Alias=23494990,PF3D7_1012900,XP_001347411.1,AAN35324.1,PF10_0126,12368864,124802233,810284,PF10_0126,Q8IJR6
0.000592531	0	0.00243191	0	Pf3D7_12_v3	1952568	1954624	ID=PF3D7_1247300;Name=PF3D7_1247300;description=conserved+protein%2C+unknown+function;size=2057;web_id=PF3D7_1247300;locus_tag=PF3D7_1247300;size=2057;Alias=XP_001350858.2,MAL12P1.453,254945429,PFL2270w,PF3D7_1247300,AAN36538.2,Q8I4V9,258597592,811506,gpiAnchor1path,PFL2270w,2277.t00454,12368864
8.949e-05	0	0.00243902	0	Pf3D7_06_v3	754395	754805	ID=PF3D7_0617900;Name=PF3D7_0617900;description=histone+H3+variant%2C+putative+%28H3.3%29;size=411;web_id=PF3D7_0617900;locus_tag=PF3D7_0617900;size=411;Alias=CAG24994.1,XP_966164.1,2270.t00069,PF3D7_0617900,acet_recog_mod,156100997,EAA17039.1,NucleoAssembly,H3.3,arginine,AAA85673.1,Histone,82594554,C6KT19,MAL6P1.248,XP_001616192.1,12368867,46361130,chromatin,3885798,86171194,EDL46465.1,PFF0865w,…
8.949e-05	0	0.00243902	0	Pf3D7_11_v3	1097117	1097527	ID=PF3D7_1128200;Name=PF3D7_1128200;description=multiprotein+bridging+factor+type+1%2C+putative;size=411;web_id=PF3D7_1128200;locus_tag=PF3D7_1128200;size=411;Alias=810840,PF11_0293,Pfal001263AAA,XP_001347964.1,Q8II81,124804310,PF11_0293,AAN35877.1,12368864,PF3D7_1128200,23496218,12368867,RNApolyI
9.03717e-05	0	0.00246305	0	Pf3D7_13_v3	1184208	1185020	ID=PF3D7_1328100;Name=PF3D7_1328100;description=proteasome+subunit+beta+type+7+precursor%2C+putative;size=813;web_id=PF3D7_1328100;locus_tag=PF3D7_1328100;size=813;Alias=PF13_0156,proteases,814126,CAD52425.1,proteasome_new,proteaUbiqpath,23615434,PF3D7_1328100,Q8I6T3,XP_001350017.1,124513322,PF13_0156
0.000966477	0	0.00246508	0	Pf3D7_08_v3	1022629	1023846	ID=PF3D7_0823200;Name=PF3D7_0823200;description=RNA+binding+protein%2C+putative;size=1218;web_id=PF3D7_0823200;locus_tag=PF3D7_0823200;size=1218;Alias=124512318,XP_001349292.1,MAL8P1.40,MAL8P1.40,Q8IB66,2655381,23499061,12368867,PF3D7_0823200,CAD51141.1
0.000110415	0	0.00251256	0	PFC10_API_IRAB	21548	21946	ID=PFC10_API0059;Name=PFC10_API0059;description=apicoplast+ribosomal+protein+S11+%28rps11%29;size=399;web_id=PFC10_API0059;locus_tag=PFC10_API0059;size=399;Alias=prokaryotes,PFC10_API0059,gen_apic_genom,rps11,1171606,CAA64590.1,PFC10_API0059
0.00138361	0	0.00251256	0	Pf3D7_07_v3	880465	880863	ID=PF3D7_0720300;Name=PF3D7_0720300;description=conserved+Plasmodium+protein%2C+unknown+function;size=399;web_id=PF3D7_0720300;locus_tag=PF3D7_0720300;size=399;Alias=23498872,MAL7P1.105,124511942,MAL7P1.105,PF3D7_0720300,XP_001349104.1,CAD50950.1,Q8IBP9,2654958
0.000523898	0	0.00251414	0	Pf3D7_02_v3	423063	424654	ID=PF3D7_0210300;Name=PF3D7_0210300;description=monocarboxylate+transporter%2C+putative;size=1592;web_id=PF3D7_0210300;locus_tag=PF3D7_0210300;size=1592;Alias=PPM,812693,O96186,3845191,9804551,12368864,PFB0465c,124801133,PF02_0097,AAC71882.1,transporters,PF3D7_0210300,XP_001349611.1,PFB0465c,glycolysispath
0.000631704	0	0.00251572	0	Pf3D7_05_v3	1129959	1130754	ID=PF3D7_0527100;Name=PF3D7_0527100;description=ubiquitin-conjugating+enzyme+E2+N%2C+putative+%28UBC13%29;size=796;web_id=PF3D7_0527100;locus_tag=PF3D7_0527100;size=796;Alias=124506459,23504853,UBC13,813086,12368867,PFE1350c,Q8I3J4,XP_001351827.1,PF3D7_0527100,proteasome_new,proteaUbiqpath,CAD51634.1,MAL5P1.270,PFE1350c
0.000962857	0	0.0025227	0	Pf3D7_13_v3	1882964	1884946	ID=PF3D7_1347000;Name=PF3D7_1347000;description=G-beta+repeat+protein%2C+putative;size=1983;web_id=PF3D7_1347000;locus_tag=PF3D7_1347000;size=1983;Alias=PF13_0250,CAD52593.1,124513656,Q8IDM8,XP_001350184.1,PF3D7_1347000,PF13_0250,23615601,814215
0.00187313	0	0.00252525	0	Pf3D7_10_v3	1223375	1224167	ID=PF3D7_1030000;Name=PF3D7_1030000;description=transcription+factor%2C+putative;size=793;web_id=PF3D7_1030000;locus_tag=PF3D7_1030000;size=793;Alias=12368867,12368864,RNApolyII,Q8IJA5,PF10_0293,23495159,810450,XP_001347577.1,AAN35490.1,124802730,PF10_0293,PF3D7_1030000
0.000139072	0	0.00252845	0	Pf3D7_10_v3	871095	871886	ID=PF3D7_1021600;Name=PF3D7_1021600;description=deoxyribose-phosphate+aldolase%2C+putative;size=792;web_id=PF3D7_1021600;locus_tag=PF3D7_1021600;size=792;Alias=12368867,PF10_0210,12368864,XP_001347494.1,Q8IJI7,810367,124802517,23495075,AAN35407.1,PF10_0210,ppcpath,PF3D7_1021600
0.000152987	0	0.00255973	0	Pf3D7_04_v3	1040470	1041642	ID=PF3D7_0422700;Name=PF3D7_0422700;description=eukaryotic+initiation+factor%2C+putative;size=1173;web_id=PF3D7_0422700;locus_tag=PF3D7_0422700;size=1173;Alias=812458,Q8IFN9,12368867,23498289,PFD1070w,117956286,124505577,ABK58711.1,CAD49261.1,MAL4P1.208,PF3D7_0422700,Ribosomegenes,XP_001351530.1,PFD1070w,intTranslation,riboMaturation
0.00476684	0	0.00255973	0	Pf3D7_13_v3	160488	161660	ID=PF3D7_1303200.1;Name=PF3D7_1303200.1;description=SNARE+protein%2C+putative+%28VAMP8%29;size=1173;web_id=PF3D7_1303200.1;locus_tag=PF3D7_1303200.1;size=1173;Alias=XP_001349759.1,124512806,ABG38011.1,CAD52166.1,COPI,23615176,rabCycle,813712,MAL13P1.16,clathrintransport,MAL13P1.16,Q8IET3,vesExocytosis,COPII,PF3D7_1303200.1,VAMP8,109692349
0.00476684	0	0.00255973	0	Pf3D7_13_v3	160488	161660	ID=PF3D7_1303200.2;Name=PF3D7_1303200.2;description=SNARE+protein%2C+putative;size=1173;web_id=PF3D7_1303200.2;locus_tag=PF3D7_1303200.2;size=1173;Alias=PF3D7_1303200.2
9.42e-05	0	0.00256739	0	Pf3D7_11_v3	1668302	1669081	ID=PF3D7_1141600;Name=PF3D7_1141600;description=dolichol+phosphate+mannose+synthase+%28DPM1%29;size=780;web_id=PF3D7_1141600;locus_tag=PF3D7_1141600;size=780;Alias=810973,23496353,dolicholmetpath,PF11_0427,sphingometpath,Q8IHU9,PF11_0427,XP_001348097.1,DPM1,AAN36010.1,124804740,PF3D7_1141600
0.000650555	0	0.00258398	0	Pf3D7_06_v3	467481	468642	ID=PF3D7_0611200;Name=PF3D7_0611200;description=transcription+factor+with+AP2+domain%28s%29%2C+putative+%28ApiAP2%29;size=1162;web_id=PF3D7_0611200;locus_tag=PF3D7_0611200;size=1162;Alias=2270.t00202,86170870,MAL6P1.114,ApiAP2,PFF0550w,PF3D7_0611200,46361066,XP_966101.1,PFF0550w,3885954,C6KSV7,CAG25353.1
0.000777508	0	0.00258589	0	Pf3D7_03_v3	178420	181127	ID=PF3D7_0303400;Name=PF3D7_0303400;description=palmitoyl+transferase+%28AnkDHHC%29;size=2708;web_id=PF3D7_0303400;locus_tag=PF3D7_0303400;size=2708;Alias=814351,O97224,AnkDHHC,10448855,12368867,23477021,MAL3P2.1,PFC0160w,124504733,CAB38988.3,prenylation,PF3D7_0303400,XP_001351109.1,PFC0160w
0.00236229	0	0.0025974	0	Pf3D7_14_v3	2014670	2015055	ID=PF3D7_1449200;Name=PF3D7_1449200;description=conserved+Plasmodium+protein%2C+unknown+function;size=386;web_id=PF3D7_1449200;locus_tag=PF3D7_1449200;size=386;Alias=ACU12415.1,PF3D7_1449200,XP_002585467.1,255528874,C6S3J1,PF14_0468a,PF14_0468a,8445031,258549216,12368864
0.000638228	0	0.00260756	0	Pf3D7_01_v3	204622	205389	ID=PF3D7_0104500;Name=PF3D7_0104500;description=conserved+Plasmodium+protein%2C+unknown+function;size=768;web_id=PF3D7_0104500;locus_tag=PF3D7_0104500;size=768;Alias=23510621,PFA0230c,124505729,MAL1P1.36,CAD49006.1,PF3D7_0104500,Pviv007476AAS,XP_001350978.1,PFA0230c
9.67321e-05	0	0.00262009	0	Pf3D7_14_v3	640374	641519	ID=PF3D7_1415800;Name=PF3D7_1415800;description=small+subunit+rRNA+dimethylase%2C+putative;size=1146;web_id=PF3D7_1415800;locus_tag=PF3D7_1415800;size=1146;Alias=riboMaturation,124808498,23497221,PF14_0156,Q8ILT8,AAN36768.1,811737,PF3D7_1415800,12368864,PF14_0156,nuclearGenes,XP_001348329.1,Ribosomegenes
0.000284888	0	0.00262467	0	Pf3D7_01_v3	93113	93875	ID=PF3D7_0102000;Name=PF3D7_0102000;description=Plasmodium+exported+protein+%28PHISTa%29%2C+unknown+function%2C+pseudogene;size=763;web_id=PF3D7_0102000;locus_tag=PF3D7_0102000;size=763;Alias=PFA0100c,MAL1P1.11,PF3D7_0102000,PFA0100c
0.00124337	0	0.00262927	0	Pf3D7_07_v3	886346	887487	ID=PF3D7_0720500;Name=PF3D7_0720500;description=conserved+Plasmodium+protein%2C+unknown+function;size=1142;web_id=PF3D7_0720500;locus_tag=PF3D7_0720500;size=1142;Alias=C0H4N9,XP_002808786.1,225632172,MAL7P1.106,2654959,PF3D7_0720500,MAL7P1.106,296004873,CAX64059.1
9.6555e-05	0	0.00263158	0	Pf3D7_11_v3	1001182	1001562	ID=PF3D7_1125500;Name=PF3D7_1125500;description=small+nuclear+ribonucleoprotein+D1%2C+putative+%28SNRPD1%29;size=381;web_id=PF3D7_1125500;locus_tag=PF3D7_1125500;size=381;Alias=PF11_0266,PF11_0266,810813,arginine,12368864,XP_001347937.1,PF3D7_1125500,23496190,Q8IIA8,SNRPD1,124804217,12368867,AAN35850.1
0.00123432	0	0.00265604	0	Pf3D7_03_v3	260332	261085	ID=PF3D7_0305400;Name=PF3D7_0305400;description=conserved+Plasmodium+protein%2C+unknown+function;size=754;web_id=PF3D7_0305400;locus_tag=PF3D7_0305400;size=754;Alias=814372,Q9NLB5,10448855,12368867,23477027,PFC0241w,124504775,CAB89171.2,PF3D7_0305400,XP_001351130.1,PFC0241w
9.77121e-05	0	0.00266312	0	Pf3D7_14_v3	2051621	2053123	ID=PF3D7_1450100;Name=PF3D7_1450100;description=signal+recognition+particle+SRP54+%28SRP54%29;size=1503;web_id=PF3D7_1450100;locus_tag=PF3D7_1450100;size=1503;Alias=12368867,12368864,PF14_0477,PF14_0477,23497549,SRPmTargeting,XP_001348651.1,Q8IKX4,326787503,AEA07718.1,124809679,SRP54,812059,PF3D7_1450100,AAN37090.1
0.00045897	0	0.00266525	0	Pf3D7_03_v3	306108	307984	ID=PF3D7_0306800;Name=PF3D7_0306800;description=T-complex+protein+beta+subunit%2C+putative;size=1877;web_id=PF3D7_0306800;locus_tag=PF3D7_0306800;size=1877;Alias=814386,O97247,10448855,12368867,PFC0285c,chapfold,MAL3P2.26,centrosome,PF3D7_0306800,Pf_chaperones,PFC0285c
0.00256704	0	0.00266667	0	Pf3D7_07_v3	858742	859492	ID=PF3D7_0719600;Name=PF3D7_0719600;description=60S+ribosomal+protein+L11a%2C+putative;size=751;web_id=PF3D7_0719600;locus_tag=PF3D7_0719600;size=751;Alias=PF07_0079,CAD50943.1,XP_001349097.1,PF07_0079,12368867,2655123,124511928,PF3D7_0719600,23498865,Q8IBQ6,ribosomeStruct
0.0013247	0	0.0026738	0	Pf3D7_10_v3	808618	808992	ID=PF3D7_1019900;Name=PF3D7_1019900;description=autophagy-related+protein+8%2C+putative+%28ATG8%29;size=375;web_id=PF3D7_1019900;locus_tag=PF3D7_1019900;size=375;Alias=PF10_0193,124802463,PF3D7_1019900,ATG8,XP_001347478.1,Q8IJK2,molecularMotor,12368864,23495059,AAN35391.1,810351,PF10_0193
0.000391425	0	0.00267738	0	Pf3D7_05_v3	944184	944931	ID=PF3D7_0522800;Name=PF3D7_0522800;description=G10+protein%2C+putative;size=748;web_id=PF3D7_0522800;locus_tag=PF3D7_0522800;size=748;Alias=XP_001351785.1,MAL5P1.228,PF3D7_0522800,PFE1140c,813043,PFE1140c,124506375,12368867,Q8I3N5,CAD51592.1,23504714
0.00294063	0	0.00269542	0	Pf3D7_10_v3	360625	362480	ID=PF3D7_1008700;Name=PF3D7_1008700;description=tubulin+beta+chain;size=1856;web_id=PF3D7_1008700;locus_tag=PF3D7_1008700;size=1856;Alias=PF10_0084,295762,12368864,tubulin,cont_micro_asse,AAN35282.1,PF10_0084,Q7KQL5,microtubuleDynam,12368867,124802114,Q7KQL5.1,PF3D7_1008700,23494948,810242,1351204,Centriole,P14643.2,CAA34207.1,centrosome,mitoticCentro,XP_001347369.1,Kinetochore,protPV,74876423
0.000990867	0	0.00269784	0	Pf3D7_02_v3	720437	722661	ID=PF3D7_0217500;Name=PF3D7_0217500;description=calcium+dependent+protein+kinase+1+%28CDPK1%29;size=2225;web_id=PF3D7_0217500;locus_tag=PF3D7_0217500;size=2225;Alias=9878,CDPK1,812762,P62344,P_body,3845284,50401835,50401836,P62343.2,P62344.2,PFB0815w,124801388,PF02_0166,AAC71952.1,CAA47704.1,calmodulin,PF3D7_0217500,XP_001349680.1,PFB0815w,Protein_kinases
0.00109221	0	0.00271739	0	Pf3D7_08_v3	677989	678725	ID=PF3D7_0813900;Name=PF3D7_0813900;description=40S+ribosomal+protein+S16%2C+putative;size=737;web_id=PF3D7_0813900;locus_tag=PF3D7_0813900;size=737;Alias=2655275,PF3D7_0813900,12368867,PF08_0076,124512506,Q8IAX5,CAD51235.1,23499155,PF08_0076,ribosomeStruct,XP_001349386.1
0.000100523	0	0.00273973	0	Pf3D7_14_v3	2518392	2518757	ID=PF3D7_1462000;Name=PF3D7_1462000;description=thioredoxin-like+protein+%28TLP1%29;size=366;web_id=PF3D7_1462000;locus_tag=PF3D7_1462000;size=366;Alias=PF3D7_1462000,XP_001348764.1,124810114,Q8IKL4,AAN37203.1,PF14_0590,TLP1,33324482,AAQ07982.1,redoxmetpath,23497664,812172,12368864,PF14_0590,comp_redox
0.000417049	0	0.00278035	0	Pf3D7_13_v3	841671	842750	ID=PF3D7_1320400;Name=PF3D7_1320400;description=type+I+signal+peptidase+%28SPB%29;size=1080;web_id=PF3D7_1320400;locus_tag=PF3D7_1320400;size=1080;Alias=PF13_0118,XP_001349943.1,Q8IEA9,CAD52351.1,124513174,importMito,669535,23615360,814089,nuclearGenes,SPB,PF3D7_1320400,PF13_0118,proteases
0.000102584	0	0.0027959	0	Pf3D7_12_v3	1977865	1978938	ID=PF3D7_1248200;Name=PF3D7_1248200;description=RNA+binding+protein%2C+putative;size=1074;web_id=PF3D7_1248200;locus_tag=PF3D7_1248200;size=1074;Alias=AAN36546.1,PFL2310w,23496995,Q8I4V2,811514,PF3D7_1248200,PFL2310w,MAL12P1.461,XP_001350866.1,splicing,2277.t00462,12368864,Q8I4V2.1,75015306,124806921
0.00129938	0	0.00280636	0	Pf3D7_09_v3	1128871	1129940	ID=PF3D7_0927800;Name=PF3D7_0927800;description=cytochrome+c+oxidase+subunit%2C+putative;size=1070;web_id=PF3D7_0927800;locus_tag=PF3D7_0927800;size=1070;Alias=mitochondrionef,PF3D7_0927800,XP_001352148.1,PFI1365w,Q8I2N1,PFI1365w,CAD51959.1,23505178,nuclearGenes,BiogenesisCytochromeOxidase,124507103,813553,12368867
0.000931942	0	0.0028169	0	Pf3D7_12_v3	1211788	1213563	ID=PF3D7_1229500;Name=PF3D7_1229500;description=T-complex+protein+1%2C+gamma+subunit%2C+putative;size=1776;web_id=PF3D7_1229500;locus_tag=PF3D7_1229500;size=1776;Alias=XP_001350691.1,12368864,2277.t00285,PFL1425w,MAL12P1.285,mitoticCentro,12368867,23496817,centrosome,PF3D7_1229500,811337,Pf_chaperones,chapfold,tubulin,PFL1425w,124806323,microtubuleDynam,Q8I5C4,AAN36371.1
0.000104931	0	0.00285987	0	Pf3D7_14_v3	193216	194265	ID=PF3D7_1405600;Name=PF3D7_1405600;description=ribonucleotide+reductase+small+subunit+%28RNR%29;size=1050;web_id=PF3D7_1405600;locus_tag=PF3D7_1405600;size=1050;Alias=PF3D7_1405600,811635,Q8IM38,PF14_0053,23497116,8265664,PF14_0053,15769467,redoxReg,AAN36665.1,XP_001348226.1,124808087,redoxmetpath,12368864,RNR,pyrimidinemetpath
0.000155714	0	0.00286533	0	Pf3D7_01_v3	369480	370178	ID=PF3D7_0109200;Name=PF3D7_0109200;description=mRNA+cleavage+factor-like+protein%2C+putative;size=699;web_id=PF3D7_0109200;locus_tag=PF3D7_0109200;size=699;Alias=23510665,PFA0450c,124505817,MAL1P2.19,CAD49050.1,processing,mRNAcleavage,PF3D7_0109200,XP_001351022.1,PFA0450c
0.00211977	0	0.00287356	0	Pf3D7_10_v3	149342	150038	ID=PF3D7_1003200;Name=PF3D7_1003200;description=conserved+Plasmodium+protein%2C+unknown+function;size=697;web_id=PF3D7_1003200;locus_tag=PF3D7_1003200;size=697;Alias=PF10_0035,810193,12368864,PF3D7_1003200,258596973,Q8IK05,11738814,PF10_0035,AAN35233.2,254922377,XP_001347320.2
0.000105585	0	0.0028777	0	Pf3D7_12_v3	490862	491557	ID=PF3D7_1211100;Name=PF3D7_1211100;description=HSP20-like+chaperone;size=696;web_id=PF3D7_1211100;locus_tag=PF3D7_1211100;size=696;Alias=12368864,2277.t00111,Q8I5T9,MAL12P1.110,124805718,AAN36199.1,PF3D7_1211100,XP_001350519.1,23496642,Pf_chaperones,PFL0550w,811163,PFL0550w
0.000683049	0	0.00289296	0	Pf3D7_02_v3	275540	276577	ID=PF3D7_0206900.1;Name=PF3D7_0206900.1;description=merozoite+surface+protein+5+%28MSP5%29;size=1038;web_id=PF3D7_0206900.1;locus_tag=PF3D7_0206900.1;size=1038;Alias=MSP5,812661,C6S3B2,Q7KWJ3,3452233,3845149,6465923,6465925,6465927,6465929,6465931,6465935,6465937,6465939,6465941,6465943,6465947,22773877,22773880,22773883,22773886,22773889,22773895,22773898,22773901,22773904,22773907,22773910,2277…
0.000683049	0	0.00289296	0	Pf3D7_02_v3	275540	276577	ID=PF3D7_0206900.2;Name=PF3D7_0206900.2;description=merozoite+surface+protein+5;size=1038;web_id=PF3D7_0206900.2;locus_tag=PF3D7_0206900.2;size=1038;Alias=254688458,258537820,ACT79305.1,XP_002585389.1,PF3D7_0206900.2
0.000210653	0	0.00291545	0	Pf3D7_12_v3	1583909	1584595	ID=PF3D7_1238100;Name=PF3D7_1238100;description=calcyclin+binding+protein%2C+putative;size=687;web_id=PF3D7_1238100;locus_tag=PF3D7_1238100;size=687;Alias=12368864,PFL1845c,PFL1845c,Q8I542,811421,AAN36455.2,SCF,258597563,XP_001350775.2,PF3D7_1238100,MAL12P1.367,2277.t00369,254945413,proteasome_new,Pviv009344AAA
0.00155255	0	0.00291971	0	Pf3D7_11_v3	964675	965360	ID=PF3D7_1124400;Name=PF3D7_1124400;description=U6+snRNA-associated+Sm-like+protein+LSm1%2C+putative+%28LSM1%29;size=686;web_id=PF3D7_1124400;locus_tag=PF3D7_1124400;size=686;Alias=XP_001347926.2,12368864,Factors,254832654,PF11_0255,810802,LSM1,AAN35839.2,P_body,PF3D7_1124400,258597306,mRNAdeg,Q8IIB9,PF11_0255
0.000216909	0	0.00295858	0	Pf3D7_03_v3	407980	408318	ID=PF3D7_0309600;Name=PF3D7_0309600;description=60S+acidic+ribosomal+protein+P2%2C+putative;size=339;web_id=PF3D7_0309600;locus_tag=PF3D7_0309600;size=339;Alias=814411,O00806,1916071,3122763,3649766,6525230,10448855,12368867,O00806.1,PFC0400w,124504853,MAL3P3.19,AAB51131.1,AAF15361.1,CAB11115.1,PF3D7_0309600,XP_001351169.1,PFC0400w,ribosomeStruct
0.000109199	0	0.00297619	0	Pf3D7_09_v3	1247268	1247940	ID=PF3D7_0930900;Name=PF3D7_0930900;description=NifU-like+protein%2C+putative;size=673;web_id=PF3D7_0930900;locus_tag=PF3D7_0930900;size=673;Alias=nuclearGenes,XP_002808974.1,FeSProtein,9221972,296005287,PFI1835c,225631861,12368867,PFI1835c,BiosynthFeS,PF3D7_0930900,C0H578,CAX64255.1
0.000214451	0	0.00300752	0	Pf3D7_13_v3	1545070	1545735	ID=PF3D7_1338200;Name=PF3D7_1338200;description=60S+ribosomal+protein+L6-2%2C+putative;size=666;web_id=PF3D7_1338200;locus_tag=PF3D7_1338200;size=666;Alias=ribosomeStruct,814180,12368867,PF13_0213,PF13_0213,124513506,Q8IDV1,XP_001350109.1,CAD52518.1,23615526,PF3D7_1338200
0.000770816	0	0.00301811	0	Pf3D7_13_v3	1036543	1038531	ID=PF3D7_1324800;Name=PF3D7_1324800;description=dihydrofolate+synthase%2Ffolylpolyglutamate+synthase+%28DHFS-FPGS%29;size=1989;web_id=PF3D7_1324800;locus_tag=PF3D7_1324800;size=1989;Alias=653172,AAD43960.2,Pfal006436AAA,124513264,PF13_0140,PF3D7_1324800,DHFS-FPGS,23615405,814111,CAD52396.1,6093607,PF13_0140,folatebiopath,XP_001349988.1,Q8IE69
0.000164929	0	0.0030349	0	Pf3D7_14_v3	570802	571461	ID=PF3D7_1414300;Name=PF3D7_1414300;description=60S+ribosomal+protein+L10%2C+putative;size=660;web_id=PF3D7_1414300;locus_tag=PF3D7_1414300;size=660;Alias=XP_001348314.1,PF3D7_1414300,124808442,23497206,12368864,12368867,Q8ILV2,PF14_0141,PF14_0141,811722,AAN36753.1,ribosomeStruct
0.000165969	0	0.0030349	0	Pf3D7_06_v3	290426	291085	ID=PF3D7_0606900;Name=PF3D7_0606900;description=glutaredoxin-like+protein+%28GLP2%29;size=660;web_id=PF3D7_0606900;locus_tag=PF3D7_0606900;size=660;Alias=86170662,12368867,3885885,2270.t00247,MAL6P1.72,PFF0340c,CAG25239.1,XP_966059.1,C6KSR7,46362301,PF3D7_0606900,thioredoxinpath,PFF0340c,redoxmetpath,comp_redox,GLP2
0.000342997	0	0.00304414	0	Pf3D7_14_v3	1705126	1705783	ID=PF3D7_1442000;Name=PF3D7_1442000;description=ADP-ribosylation+factor%2C+putative;size=658;web_id=PF3D7_1442000;locus_tag=PF3D7_1442000;size=658;Alias=COPII,PF3D7_1442000,12368867,PF14_0399,clathrintransport,23497469,Q8IL50,COPI,NucleoAssembly,12368864,PF14_0399,124809432,811981,XP_001348573.1,18452584,AAN37012.1
0.00114734	0	0.00308642	0	Pf3D7_13_v3	2093365	2094337	ID=PF3D7_1352500;Name=PF3D7_1352500;description=thioredoxin-related+protein%2C+putative;size=973;web_id=PF3D7_1352500;locus_tag=PF3D7_1352500;size=973;Alias=814237,23615654,oxidativefolding,662490,PF3D7_1352500,12368867,XP_001350237.1,PF13_0272,PF13_0272,124513762,CAD52646.1,Q8IDH5,eukaryotes
0.000800805	0	0.00309837	0	Pf3D7_10_v3	1306241	1307532	ID=PF3D7_1032500;Name=PF3D7_1032500;description=DER1-like+protein%2C+putative+%28Der1-2%29;size=1292;web_id=PF3D7_1032500;locus_tag=PF3D7_1032500;size=1292;Alias=PF3D7_1032500,Q8IJ82,23495184,AAN35514.1,PF10_0317,Der1-2,ProteasomeMeditated,124802804,PF10_0317,810474,12368864,XP_001347601.1
0.000442803	0	0.00310318	0	Pf3D7_04_v3	817400	818689	ID=PF3D7_0418200;Name=PF3D7_0418200;description=golgi+organization+and+biogenesis+factor%2C+putative;size=1290;web_id=PF3D7_0418200;locus_tag=PF3D7_0418200;size=1290;Alias=812514,Q8I1Q5,12368867,23498248,PFD0880w,124505497,CAD49219.1,MAL4P1.171,PF3D7_0418200,XP_001351490.1,PFD0880w,proteaUbiqpath,proteasome_new
0.000713407	0	0.00311526	0	Pf3D7_12_v3	1575197	1575518	ID=PF3D7_1237800;Name=PF3D7_1237800;description=ubiquitin-like+protein%2C+putative;size=322;web_id=PF3D7_1237800;locus_tag=PF3D7_1237800;size=322;Alias=AAN36452.1,proteaUbiqpath,XP_001350772.1,PCNA_UB,PF3D7_1237800,12368867,proteasome_new,124806615,Q8I545,811418,12368864,2277.t00366,MAL12P1.364,PFL1830w,PFL1830w,23496900
0.000116619	0	0.00312012	0	Pf3D7_05_v3	1279958	1280599	ID=PF3D7_0531200;Name=PF3D7_0531200;description=mitochondrial+ribosomal+protein+S16+precursor%2C+putative;size=642;web_id=PF3D7_0531200;locus_tag=PF3D7_0531200;size=642;Alias=23504892,12368867,Q8I3F6,PF3D7_0531200,XP_001351866.1,813124,124506537,PFE1560c,CAD51673.1,nuclearGenes,PFE1560c,MAL5P1.309,ribosomeStruct
0.000151911	0	0.0031348	0	Pf3D7_07_v3	687891	688848	ID=PF3D7_0715400;Name=PF3D7_0715400;description=secreted+ookinete+protein%2C+putative+%28PSOP20%29;size=958;web_id=PF3D7_0715400;locus_tag=PF3D7_0715400;size=958;Alias=2655039,PSOP20,MAL7P1.74,Q8IBU6,PF3D7_0715400,MAL7P1.74
0.0011003	0	0.00313972	0	Pf3D7_09_v3	966795	968069	ID=PF3D7_0923900;Name=PF3D7_0923900;description=RNA+binding+protein%2C+putative;size=1275;web_id=PF3D7_0923900;locus_tag=PF3D7_0923900;size=1275;Alias=813515,PFI1175c,Q8I2R8,PF3D7_0923900,processing,23505139,CAD51921.1,124507026,XP_001352110.1,intTranslation,mRNAcleavage,12368867,PFI1175c
0.000115562	0	0.00314961	0	Pf3D7_13_v3	1368081	1368716	ID=PF3D7_1333300;Name=PF3D7_1333300;description=transmembrane+protein+Tmp21+homologue%2C+putative;size=636;web_id=PF3D7_1333300;locus_tag=PF3D7_1333300;size=636;Alias=CAD52472.1,Q8IDZ5,124513416,XP_001350064.1,11738814,12368867,apicoplastgene,813725,MAL13P1.171,MAL13P1.171,PF3D7_1333300,COPII,23615481
0.000638917	0	0.00317965	0	Pf3D7_14_v3	977908	979166	ID=PF3D7_1424400;Name=PF3D7_1424400;description=60S+ribosomal+protein+L7-3%2C+putative;size=1259;web_id=PF3D7_1424400;locus_tag=PF3D7_1424400;size=1259;Alias=AAN36844.2,12368867,258597720,255528809,PF14_0231,XP_001348405.2,811813,PF14_0231,PF3D7_1424400,ribosomeStruct,Q8ILL2,12368864
0.000117977	0	0.00321543	0	Pf3D7_06_v3	362635	363879	ID=PF3D7_0608800;Name=PF3D7_0608800;description=ornithine+aminotransferase+%28OAT%29;size=1245;web_id=PF3D7_0608800;locus_tag=PF3D7_0608800;size=1245;Alias=585604,PFF0435w,2270.t00225,vitaminB6metpath,309742,637128,86170756,Q07805.1,74911691,AAA16481.1,PF3D7_0608800,Q6LFH8,46361043,12368867,20673832,XP_966078.1,PFF0435w,Q6LFH8.1,CAG25330.1,redoxReg,MAL6P1.91,arginineproline,OAT,8264733,3885911
0.000119126	0	0.00324675	0	Pf3D7_04_v3	315562	315870	ID=PF3D7_0405800;Name=PF3D7_0405800;description=conserved+Plasmodium+protein%2C+unknown+function;size=309;web_id=PF3D7_0405800;locus_tag=PF3D7_0405800;size=309;Alias=812413,Q8I1X0,12368867,23498179,PFD0285w,PFD0290w,124505259,MAL4P1.57,CAD49151.1,PF3D7_0405800,XP_001351371.1,PFD0290w
0.000119126	0	0.00324675	0	Pf3D7_04_v3	367845	368153	ID=PF3D7_0407400;Name=PF3D7_0407400;description=conserved+Plasmodium+protein%2C+unknown+function;size=309;web_id=PF3D7_0407400;locus_tag=PF3D7_0407400;size=309;Alias=812368,Q9U0L2,6562712,12368867,PFD0365c,124505293,MAL4P2.10,CAB62851.1,PF3D7_0407400,XP_001351388.1,PFD0365c
0.00011997	0	0.00326975	0	Pf3D7_13_v3	507900	509735	ID=PF3D7_1311900;Name=PF3D7_1311900;description=vacuolar+ATP+synthase+subunit+a+%28vapA%29;size=1836;web_id=PF3D7_1311900;locus_tag=PF3D7_1311900;size=1836;Alias=PPM,814043,vapA,Q76NM6,Q03498.1,50401476,PF13_0065,Q76NM6.1,418177,ERGolgiVacuole,PF13_0065,CAD52254.1,transporters,AAA29782.1,124512982,23615264,XP_001349847.1,PF3D7_1311900,160736
0.000584193	0	0.00327332	0	Pf3D7_11_v3	1473505	1474116	ID=PF3D7_1137500;Name=PF3D7_1137500;description=apicoplast+ribosomal+protein+S14p%2FS29e+precursor%2C+putative;size=612;web_id=PF3D7_1137500;locus_tag=PF3D7_1137500;size=612;Alias=Q8IHZ0,XP_001348056.1,124804615,12368864,ribosomeStruct,PF11_0386,prokaryotes,11738814,PF3D7_1137500,810932,PF11_0386,23496311,AAN35969.1,12368867,apicoplastgene
0.000122439	0	0.00333704	0	Pf3D7_03_v3	301007	301906	ID=PF3D7_0306500;Name=PF3D7_0306500;description=conserved+Plasmodium+protein%2C+unknown+function;size=900;web_id=PF3D7_0306500;locus_tag=PF3D7_0306500;size=900;Alias=814383,O97246,4493903,10448855,12368867,PFC0280c,124504797,MAL3P2.25,CAB39012.1,PF3D7_0306500,XP_001351141.1,PFC0280c
0.000125005	0	0.00334448	0	Pf3D7_08_v3	816803	817102	ID=PF3D7_0817900;Name=PF3D7_0817900;description=high+mobility+group+protein+%28HMGB2%29;size=300;web_id=PF3D7_0817900;locus_tag=PF3D7_0817900;size=300;Alias=CAD51195.1,HMGB2,124512426,XP_001349346.1,MAL8P1.72,2655422,23499115,chrom_remod,MAL8P1.72,Q8IB14,PF3D7_0817900,NucleoAssembly
0.000286056	0	0.00338696	0	Pf3D7_13_v3	297178	298359	ID=PF3D7_1306400;Name=PF3D7_1306400;description=26S+proteasome+regulatory+subunit%2C+putative;size=1182;web_id=PF3D7_1306400;locus_tag=PF3D7_1306400;size=1182;Alias=814012,12368867,CAD52198.1,PF3D7_1306400,23615208,proteaUbiqpath,Q8IEQ1,XP_001349791.1,proteasome_new,PF13_0033,124512870,PF13_0033
0.000207328	0	0.00343249	0	Pf3D7_05_v3	1226883	1227757	ID=PF3D7_0530100;Name=PF3D7_0530100;description=SNARE+protein%2C+putative+%28SYN6%29;size=875;web_id=PF3D7_0530100;locus_tag=PF3D7_0530100;size=875;Alias=PFE1505w,vesExocytosis,PFE1505w,MAL5P1.298,XP_001351855.1,ABG38008.1,SYN6,rabCycle,109692343,PF3D7_0530100,124506515,813114,CAD51662.1,Q8I3G6,23504881
0.00108971	0	0.00344319	0	Pf3D7_08_v3	860384	862417	ID=PF3D7_0818900;Name=PF3D7_0818900;description=heat+shock+protein+70+%28Hsp70%29;size=2034;web_id=PF3D7_0818900;locus_tag=PF3D7_0818900;size=2034;Alias=chaperone,Hsp70,CAD51185.1,657268,PF3D7_0818900,redoxReg,ProteasomeMeditated,importMito,XP_001349336.1,centrosome,Pf_chaperones,PF08_0054,eukaryotes,Q8IB24,23499105,PF08_0054,MCprot,chapfold,124512406,protPV,2655254,2448622
0.00342107	0	0.00347464	0	Pf3D7_04_v3	830989	832428	ID=PF3D7_0418500;Name=PF3D7_0418500;description=Bet3+transport+protein%2C+putative+%28BET3p%29;size=1440;web_id=PF3D7_0418500;locus_tag=PF3D7_0418500;size=1440;Alias=BET3p,812505,Q8I1Q2,12368867,23498251,PFD0895c,124505503,CAD49222.1,MAL4P1.174,PF3D7_0418500,XP_001351493.1,PFD0895c,largeTethering
0.000127621	0	0.00347826	0	Pf3D7_13_v3	454061	454636	ID=PF3D7_1310200;Name=PF3D7_1310200;description=conserved+Plasmodium+protein%2C+unknown+function;size=576;web_id=PF3D7_1310200;locus_tag=PF3D7_1310200;size=576;Alias=XP_002809006.1,C0H5A9,813938,225631943,296005357,11738814,CAX64287.1,MAL13P1.49,MAL13P1.49,PF3D7_1310200
0.000170009	0	0.00349243	0	Pf3D7_14_v3	634815	636533	ID=PF3D7_1415700;Name=PF3D7_1415700;description=serine+C-palmitoyltransferase%2C+putative;size=1719;web_id=PF3D7_1415700;locus_tag=PF3D7_1415700;size=1719;Alias=811736,PF14_0155,vitaminB6metpath,23497220,apicoplastgene,AAN36767.1,12368864,PF14_0155,11738814,sphingometpath,124808495,PF3D7_1415700,Q8ILT9,XP_001348328.1
0.000454577	0	0.00351185	0	Pf3D7_04_v3	668578	669717	ID=PF3D7_0415000;Name=PF3D7_0415000;description=arsenical+pump-driving+ATPase%2C+putative;size=1140;web_id=PF3D7_0415000;locus_tag=PF3D7_0415000;size=1140;Alias=812559,Q8I1T8,12368867,23498215,74861813,PFD0725c,Q8I1T8.1,124505431,CAD49186.1,MAL4P1.140,transporters,PF3D7_0415000,XP_001351457.1,PFD0725c
0.000692628	0	0.0035503	0	Pf3D7_14_v3	1092936	1093781	ID=PF3D7_1427900;Name=PF3D7_1427900;description=conserved+protein%2C+unknown+function;size=846;web_id=PF3D7_1427900;locus_tag=PF3D7_1427900;size=846;Alias=PF3D7_1427900,AAN36870.1,12368864,PF14_0257,124808875,XP_001348431.1,Q8ILI6,811839,PF14_0257,75016040,phosphorylation,23497325,15895553,Pfal003552AAA,Q8ILI6.1,hist_chap
0.000130573	0	0.00355872	0	Pf3D7_11_v3	1013466	1013747	ID=PF3D7_1125900;Name=PF3D7_1125900;description=conserved+Plasmodium+protein%2C+unknown+function;size=282;web_id=PF3D7_1125900;locus_tag=PF3D7_1125900;size=282;Alias=810816,12368864,PF11_0269,Q8IIA5,XP_001347940.1,AAN35853.1,124804227,PF11_0269,PF3D7_1125900,23496194
0.000130573	0	0.00355872	0	Pf3D7_12_v3	586809	587090	ID=PF3D7_1213600;Name=PF3D7_1213600;description=dynein+light+chain+1%2C+putative;size=282;web_id=PF3D7_1213600;locus_tag=PF3D7_1213600;size=282;Alias=molecularMotor,124805799,centrosome,811185,Kinetochore,193811363,PFL0660w,AAN36221.1,XP_002262213.1,12368864,MAL12P1.132,XP_001617235.1,12368867,221061287,CAQ42091.1,microtubuleDynam,148806109,156103085,mitoticCentro,XP_001350541.1,PF3D7_1213600,Q8I…
0.000181866	0	0.0035791	0	Pf3D7_14_v3	427191	428588	ID=PF3D7_1410600;Name=PF3D7_1410600;description=eukaryotic+translation+initiation+factor+2+gamma+subunit%2C+putative;size=1398;web_id=PF3D7_1410600;locus_tag=PF3D7_1410600;size=1398;Alias=12368864,124808285,PF14_0104,12368867,XP_001348277.1,AAN36716.1,Q8ILY9,811685,23497168,PF3D7_1410600,intTranslation,PF14_0104
0.000258983	0	0.00359712	0	Pf3D7_13_v3	2725669	2725947	ID=PF3D7_1368600;Name=PF3D7_1368600;description=mitochondrial+import+inner+membrane+translocase%2C+putative;size=279;web_id=PF3D7_1368600;locus_tag=PF3D7_1368600;size=279;Alias=PF13_0358,XP_001350396.1,CAD52805.1,124514080,12368867,814317,PF3D7_1368600,23615813,PF13_0358,Q8ID24,importMito
0.000133583	0	0.00364078	0	Pf3D7_13_v3	2482472	2483296	ID=PF3D7_1361900;Name=PF3D7_1361900;description=proliferating+cell+nuclear+antigen+%28PCNA%29;size=825;web_id=PF3D7_1361900;locus_tag=PF3D7_1361900;size=825;Alias=PCNA,P61074.1,PF13_0328,P61074,DNA_transles,dnareplication,9932,46576879,124513948,23615747,400740,PF13_0328,histone_chaperone,P31008.1,PF3D7_1361900,PCNA_UB,XP_001350330.1,ExcisionRepairTab,hist_chap,CAA48673.1,DNArepair,excisionrepair…
0.000404523	0	0.00365408	0	Pf3D7_13_v3	2470972	2471793	ID=PF3D7_1361700;Name=PF3D7_1361700;description=cytochrome+c+oxidase+subunit+2%2C+putative;size=822;web_id=PF3D7_1361700;locus_tag=PF3D7_1361700;size=822;Alias=CAD52737.1,mitochondrionef,23615745,XP_001350328.1,nuclearGenes,Q8ID89,PF13_0327,apoptosis,124513944,BiogenesisCytochromeOxidase,PF3D7_1361700,PF13_0327,814287
0.000185857	0	0.00365764	0	Pf3D7_11_v3	624370	625737	ID=PF3D7_1116500;Name=PF3D7_1116500;description=folate+transporter+2+%28FT2%29;size=1368;web_id=PF3D7_1116500;locus_tag=PF3D7_1116500;size=1368;Alias=PPM,XP_001347843.1,transporters,810719,23496095,PF3D7_1116500,SHAMTandGCV,AAN35756.1,124803892,Q8IIK1,PF11_0172,12368864,FT2,PF11_0172
0.000305009	0	0.00368189	0	Pf3D7_08_v3	231398	232756	ID=PF3D7_0803700;Name=PF3D7_0803700;description=tubulin+gamma+chain+%28g-tub%29;size=1359;web_id=PF3D7_0803700;locus_tag=PF3D7_0803700;size=1359;Alias=XP_001349477.1,Centriole,PF3D7_0803700,124512688,tubulin,23499246,CAD51326.1,Kinetochore,2655324,g-tub,mitoticCentro,Q8IAN7,microtubuleDynam,centrosome,PF08_0125,PF08_0125
0.000777481	0	0.00369458	0	Pf3D7_14_v3	1942151	1942963	ID=PF3D7_1447600;Name=PF3D7_1447600;description=conserved+Plasmodium+protein%2C+unknown+function;size=813;web_id=PF3D7_1447600;locus_tag=PF3D7_1447600;size=813;Alias=PF14_0452a,255528871,8444942,XP_002585465.1,ACU12413.1,258549212,C6S3I9,PF3D7_1447600,12368864,PF14_0452a
0.000137677	0	0.00375235	0	Pf3D7_13_v3	2403511	2404044	ID=PF3D7_1360000;Name=PF3D7_1360000;description=conserved+Plasmodium+protein%2C+unknown+function;size=534;web_id=PF3D7_1360000;locus_tag=PF3D7_1360000;size=534;Alias=PF3D7_1360000,Q8IDA5,814279,CAD52720.1,PF13_0317,23615728,XP_001350311.1,124513910,PF13_0317
0.00068985	0	0.00375235	0	Pf3D7_14_v3	2221351	2221884	ID=PF3D7_1454100;Name=PF3D7_1454100;description=tRNA+intron+endonuclease%2C+putative;size=534;web_id=PF3D7_1454100;locus_tag=PF3D7_1454100;size=534;Alias=exportin,124809810,Q8I718,PF3D7_1454100,XP_001348688.1,PF14_0514,23497586,12368864,812096,AAN37127.1,PF14_0514
0.000137936	0	0.0037594	0	Pf3D7_14_v3	1050050	1050316	ID=PF3D7_1426900;Name=PF3D7_1426900;description=ubiquinol-cytochrome+c+reductase+hinge+protein%2C+putative;size=267;web_id=PF3D7_1426900;locus_tag=PF3D7_1426900;size=267;Alias=XP_001348422.1,12368864,811830,Q8ILJ5,PF14_0248,nuclearGenes,AAN36861.1,PF14_0248,mitochondrionef,23497316,res_antimal,124808839,12368867,PF3D7_1426900
0.000188096	0	0.00379867	0	Pf3D7_12_v3	2064987	2066040	ID=PF3D7_1250300;Name=PF3D7_1250300;description=Hbeta58%2FVps26+protein+homolog%2C+putative;size=1054;web_id=PF3D7_1250300;locus_tag=PF3D7_1250300;size=1054;Alias=PF3D7_1250300,Q8I4T1.1,MAL12P1.481,AAN36567.1,sub_loc_adapt,74862603,XP_001350887.1,PFL2415w,811535,23497017,12368864,Q8I4T1,2277.t00483,124807015,largeTethering,PFL2415w
0.000139509	0	0.00380228	0	Pf3D7_07_v3	109915	110178	ID=PF3D7_0702600;Name=PF3D7_0702600;description=chitinase+precursor+fragment%2C+truncated;size=264;web_id=PF3D7_0702600;locus_tag=PF3D7_0702600;size=264;Alias=23498729,PF3D7_0702600,XP_001348961.1,2654976,Q8I6S7,CAD50799.1,124511656,PF07_0009,PF07_0009
0.000911209	0	0.00393701	0	Pf3D7_05_v3	658423	658677	ID=PF3D7_0515800;Name=PF3D7_0515800;description=BolA-like+protein%2C+putative;size=255;web_id=PF3D7_0515800;locus_tag=PF3D7_0515800;size=255;Alias=PFE0790c,812972,PF3D7_0515800,124506235,12368867,Q8I3V0,23504643,CAD51522.1,PFE0790c,XP_001351715.1,MAL5P1.158
0.000592602	0	0.00402145	0	Pf3D7_08_v3	687340	688086	ID=PF3D7_0814200;Name=PF3D7_0814200;description=DNA%2FRNA-binding+protein+Alba+1+%28ALBA1%29;size=747;web_id=PF3D7_0814200;locus_tag=PF3D7_0814200;size=747;Alias=2655273,124512500,ALBA1,XP_001349383.1,Q8IAX8,PF3D7_0814200,23499152,PF08_0074,P_body,PF08_0074,CAD51232.1,Histone
0.000299247	0	0.00408163	0	Pf3D7_02_v3	409983	410228	ID=PF3D7_0210000;Name=PF3D7_0210000;description=secretory+complex+protein+61+gamma+subunit+%28Sec61-gamma%29;size=246;web_id=PF3D7_0210000;locus_tag=PF3D7_0210000;size=246;Alias=812690,O96183,3845187,9804551,12368864,12368867,PFB0450w,124801122,PF02_0094,AAC71879.1,eukaryotes,Sec61-gamma,PF3D7_0210000,SRPmTargeting,XP_001349608.1,PFB0450w,ProteasomeMeditated
0.00239107	0	0.00413223	0	Pf3D7_13_v3	2632534	2633260	ID=PF3D7_1365900;Name=PF3D7_1365900;description=60S+ribosomal+protein+L40%2FUBI%2C+putative;size=727;web_id=PF3D7_1365900;locus_tag=PF3D7_1365900;size=727;Alias=CAD52778.1,PF13_0346,814305,23615786,XP_001350369.1,PF13_0346,Q8ID50,proteaUbiqpath,ribosomeStruct,PF3D7_1365900,12368867,124514026,PCNA_UB
0.00015918	0	0.00433839	0	Pf3D7_13_v3	2326394	2326855	ID=PF3D7_1358700;Name=PF3D7_1358700;description=conserved+Plasmodium+protein%2C+unknown+function;size=462;web_id=PF3D7_1358700;locus_tag=PF3D7_1358700;size=462;Alias=813850,XP_001350298.1,23615715,MAL13P1.288,MAL13P1.288,PF3D7_1358700,124513884,Q8IDB8,CAD52707.1
0.000164654	0	0.00440529	0	Pf3D7_12_v3	402300	402527	ID=PF3D7_1208600;Name=PF3D7_1208600;description=tim10+homologue%2C+putative;size=228;web_id=PF3D7_1208600;locus_tag=PF3D7_1208600;size=228;Alias=23496618,PFL0430w,AAN36175.1,12368867,811139,PF3D7_1208600,nuclearGenes,MAL12P1.86,2277.t00087,XP_001350495.1,124805635,importMito,12368864,PFL0430w,Q8I5W2
0.00167153	0	0.00443131	0	Pf3D7_14_v3	143984	144661	ID=PF3D7_1404000;Name=PF3D7_1404000;description=conserved+Plasmodium+protein%2C+unknown+function;size=678;web_id=PF3D7_1404000;locus_tag=PF3D7_1404000;size=678;Alias=PF14_0037,AAN36649.1,124808048,PF3D7_1404000,XP_001348210.1,Q8IM54,PF14_0037,12368864,23497100,811619
0.000321919	0	0.00451467	0	Pf3D7_12_v3	1140943	1141386	ID=PF3D7_1228000;Name=PF3D7_1228000;description=conserved+Plasmodium+protein%2C+unknown+function;size=444;web_id=PF3D7_1228000;locus_tag=PF3D7_1228000;size=444;Alias=MAL12P1.271,XP_001350677.1,AAN36357.1,23496803,811323,12368864,Q8I5D8,2277.t00271,PFL1355w,124806273,PFL1355w,PF3D7_1228000
0.000219461	0	0.00451807	0	Pf3D7_14_v3	1205088	1206416	ID=PF3D7_1430500;Name=PF3D7_1430500;description=conserved+Plasmodium+protein%2C+unknown+function;size=1329;web_id=PF3D7_1430500;locus_tag=PF3D7_1430500;size=1329;Alias=PF14_0284,124808982,Q8ILF9,PF3D7_1430500,23497352,AAN36897.1,XP_001348458.1,PF14_0284,811866,12368864,11738814
0.000247467	0	0.00452489	0	Pf3D7_10_v3	1125283	1126167	ID=PF3D7_1026900;Name=PF3D7_1026900;description=biotin--acetyl-CoA-carboxylase%2C+putative;size=885;web_id=PF3D7_1026900;locus_tag=PF3D7_1026900;size=885;Alias=PF3D7_1026900,12368864,ACT83902.1,XP_002585414.1,PF10_0409,8445054,C6S3D7,258549083,254922467,facidsynthesispath,PF10_0409,653622
0.000171452	0	0.00458716	0	Pf3D7_08_v3	635537	635755	ID=PF3D7_0812800;Name=PF3D7_0812800;description=conserved+Plasmodium+protein%2C+unknown+function;size=219;web_id=PF3D7_0812800;locus_tag=PF3D7_0812800;size=219;Alias=MAL8P1.380,PF3D7_0812800,C0H4U3,9221951,MAL8P1.380,296005003,CAX64119.1,225632237,XP_002808842.1
0.000170259	0	0.00464037	0	Pf3D7_01_v3	392604	393035	ID=PF3D7_0110200;Name=PF3D7_0110200;description=human+hepatopoietin-like+protein%2C+putative;size=432;web_id=PF3D7_0110200;locus_tag=PF3D7_0110200;size=432;Alias=23510675,PFA0500w,124505837,MAL1P2.29,CAD49060.1,FeSProtein,nuclearGenes,PF3D7_0110200,XP_001351032.1,PFA0500w
0.000255611	0	0.00473373	0	Pf3D7_10_v3	164945	165790	ID=PF3D7_1003600;Name=PF3D7_1003600;description=membrane+skeletal+protein+IMC1-related+%28ALV5%29;size=846;web_id=PF3D7_1003600;locus_tag=PF3D7_1003600;size=846;Alias=ALV5,PF10_0039,PF10_0039,PF3D7_1003600,12368864,Pfal000255AAA,linearMotor,124801984,23494902,XP_001347324.1,810197,Q8IK01,AAN35237.1
0.00193266	0	0.00475939	0	Pf3D7_03_v3	362342	364233	ID=PF3D7_0308200;Name=PF3D7_0308200;description=TCP-1%2Fcpn60+chaperonin+family%2C+putative;size=1892;web_id=PF3D7_0308200;locus_tag=PF3D7_0308200;size=1892;Alias=814399,O77323,protPV,3649758,10448855,12368867,74960893,MAL3P3.6,O77323.1,PFC0350c,chapfold,124504829,CAB11107.1,centrosome,PF3D7_0308200,Pf_chaperones,XP_001351157.1,PFC0350c
0.000453818	0	0.0047619	0	Pf3D7_14_v3	1941056	1941686	ID=PF3D7_1447500;Name=PF3D7_1447500;description=conserved+Plasmodium+protein%2C+unknown+function;size=631;web_id=PF3D7_1447500;locus_tag=PF3D7_1447500;size=631;Alias=PF14_0452,Q8IKZ9,12368864,812034,258597830,XP_001348626.2,AAN37065.2,255528870,PF3D7_1447500,PF14_0452
0.00204983	0	0.0048	0	Pf3D7_11_v3	1756557	1757182	ID=PF3D7_1144100;Name=PF3D7_1144100;description=conserved+protein%2C+unknown+function;size=626;web_id=PF3D7_1144100;locus_tag=PF3D7_1144100;size=626;Alias=PF3D7_1144100,8444952,PF11_0560,PF11_0560,12368864,C6S3G3
0.000323672	0	0.0049054	0	Pf3D7_11_v3	255714	257141	ID=PF3D7_1106000;Name=PF3D7_1106000;description=RuvB+DNA+helicase%2C+putative;size=1428;web_id=PF3D7_1106000;locus_tag=PF3D7_1106000;size=1428;Alias=AAN35660.1,12368864,PF11_0071,12368867,Q8IIU3,XP_001347747.1,124803531,23495998,ExcisionRepairTab,PF3D7_1106000,810623,PF11_0071,DNAgenes
0.000187626	0	0.00492611	0	Pf3D7_14_v3	1704594	1704797	ID=PF3D7_1441900;Name=PF3D7_1441900;description=transcription+factor+TFIIH+complex+subunit+Tfb5%2C+putative;size=204;web_id=PF3D7_1441900;locus_tag=PF3D7_1441900;size=204;Alias=excisionrepair,RNApolyII,811980,124809427,AAN37011.1,PF3D7_1441900,PF14_0398,PF14_0398,XP_001348572.1,Q8IL51,23497468,12368864
0.000982153	0	0.00492611	0	Pf3D7_14_v3	2492166	2492369	ID=PF3D7_1461300;Name=PF3D7_1461300;description=40S+ribosomal+protein+S28e%2C+putative;size=204;web_id=PF3D7_1461300;locus_tag=PF3D7_1461300;size=204;Alias=12368867,PF3D7_1461300,ribosomeStruct,12368864,PF14_0585,AAN37198.1,124810100,Q8IKL9,812167,XP_001348759.1,PF14_0585,23497658
0.000762006	0	0.00502513	0	Pf3D7_14_v3	3075788	3076186	ID=PF3D7_1475000;Name=PF3D7_1475000;description=mediator+complex+subunit+31%2C+putative;size=399;web_id=PF3D7_1475000;locus_tag=PF3D7_1475000;size=399;Alias=Q8IK88,PF14_0718,812300,124810491,12368864,PF14_0718,AAN37331.1,RNApolyII,PF3D7_1475000,23497794,XP_001348892.1
0.000189655	0	0.00513699	0	Pf3D7_06_v3	213558	214142	ID=PF3D7_0605000;Name=PF3D7_0605000;description=mitochondrial+ribosomal+protein+L24+precursor%2C+putative;size=585;web_id=PF3D7_0605000;locus_tag=PF3D7_0605000;size=585;Alias=PFF0245w,MAL6P1.53,12368867,XP_966040.1,2270.t00263,prokaryotes,ribosomeStruct,3885712,nuclearGenes,86170567,C6KSP8,PF3D7_0605000,CAG25220.1,46362282,PFF0245w
0.00029061	0	0.00534759	0	Pf3D7_05_v3	1156205	1156579	ID=PF3D7_0528000;Name=PF3D7_0528000;description=conserved+Plasmodium+protein%2C+unknown+function;size=375;web_id=PF3D7_0528000;locus_tag=PF3D7_0528000;size=375;Alias=PFE1395c,CAD51641.1,124506473,Q8I3I7,813093,23504860,12368867,PF3D7_0528000,XP_001351834.1,MAL5P1.277,PFE1395c
0.000710737	0	0.00534759	0	Pf3D7_02_v3	772316	772690	ID=PF3D7_0219200;Name=PF3D7_0219200;description=40S+ribosomal+protein+S30%2C+putative;size=375;web_id=PF3D7_0219200;locus_tag=PF3D7_0219200;size=375;Alias=812775,O96269,3845301,6831661,9804551,12368864,12368867,O96269.1,PFB0885w,124801435,PF02_0179,AAC71966.1,PF3D7_0219200,XP_001349693.1,PFB0885w,ribosomeStruct
0.000200125	0	0.005386	0	Pf3D7_09_v3	208168	208725	ID=PF3D7_0904400;Name=PF3D7_0904400;description=signal+peptidase+complex+subunit+3%2C+putative+%28SPC3%29;size=558;web_id=PF3D7_0904400;locus_tag=PF3D7_0904400;size=558;Alias=23504945,813323,eukaryotes,18160114,SPC3,PF3D7_0904400,12368867,PFI0215c,PFI0215c,CAD51729.1,Q8I3A5,XP_001351918.1,124506641,19174148,16873890
0.00152026	0	0.005386	0	Pf3D7_12_v3	526109	527780	ID=PF3D7_1211800;Name=PF3D7_1211800;description=polyubiquitin+%28PfpUB%29;size=1672;web_id=PF3D7_1211800;locus_tag=PF3D7_1211800;size=1672;Alias=MAL12P1.117,6138833,CAB59728.1,2277.t00118,PF3D7_1211800,PfpUB,AAN36206.1,XP_001350526.1,811170,Q7KQK2,124805744,ProteasomeMeditated,PFL0585w,23496650,Q9U5M1,proteaUbiqpath,proteasome_new,PFL0585w
0.000199925	0	0.00541516	0	Pf3D7_14_v3	1530276	1530830	ID=PF3D7_1437800;Name=PF3D7_1437800;description=41-2+protein+antigen+precursor%2Ctransport+protein+particle+%28TRAPP%29+component%2C+Bet3;size=555;web_id=PF3D7_1437800;locus_tag=PF3D7_1437800;size=555;Alias=112925,2693962,160039,AAA29460.1,5669542,12368864,MCprot,PF14_0358,71153354,P15847.1,124809267,PF14_0358,Q7KQM2,811940,XP_001348532.1,largeTethering,Q7KQM2.1,AAN36971.1,23497428,AAD46379.1,PF3…
0.00172802	0	0.00550964	0	Pf3D7_08_v3	104525	104888	ID=PF3D7_0801400;Name=PF3D7_0801400;description=probable+protein%2C+unknown+function;size=364;web_id=PF3D7_0801400;locus_tag=PF3D7_0801400;size=364;Alias=2655334,23499272,Q8IAL1,PF08_0136,PF08_0136,XP_001349503.1,124512740,CAD51352.1,PF3D7_0801400
0.000335339	0	0.00557103	0	Pf3D7_04_v3	616914	618350	ID=PF3D7_0413600;Name=PF3D7_0413600;description=26S+proteasome+AAA-ATPase+subunit+RPT3%2C+putative;size=1437;web_id=PF3D7_0413600;locus_tag=PF3D7_0413600;size=1437;Alias=812570,Q8I1V1,12368867,23498202,PFD0665c,124505405,CAD49173.1,MAL4P1.128,PF3D7_0413600,XP_001351444.1,PFD0665c,proteaUbiqpath,proteasome_new
0.00100193	0	0.00619835	0	Pf3D7_07_v3	736370	737338	ID=PF3D7_0716900;Name=PF3D7_0716900;description=drug+metabolite+transporter%2C+putative;size=969;web_id=PF3D7_0716900;locus_tag=PF3D7_0716900;size=969;Alias=XP_001349072.1,transporters,124511878,PF3D7_0716900,23498840,PF07_0070,2655114,12368867,Q8IBT1,PF07_0070,PPM,CAD50917.1
0.000813484	0	0.00621118	0	Pf3D7_13_v3	274073	275200	ID=PF3D7_1305600;Name=PF3D7_1305600;description=membrane+integral+peptidase%2C+M50+family%2C+putative;size=1128;web_id=PF3D7_1305600;locus_tag=PF3D7_1305600;size=1128;Alias=814007,XP_001349783.1,Q8IEQ9,CAD52190.1,124512854,23615200,PF3D7_1305600,PF13_0028,proteases,PF13_0028
0.000241139	0	0.00645161	0	Pf3D7_13_v3	2611483	2611638	ID=PF3D7_1365200;Name=PF3D7_1365200;description=conserved+Plasmodium+protein%2C+unknown+function;size=156;web_id=PF3D7_1365200;locus_tag=PF3D7_1365200;size=156;Alias=MAL13P1.580,9221982,296005576,C0H5K6,225632052,CAX64384.1,MAL13P1.580,XP_002809103.1,PF3D7_1365200
0.000250849	0	0.00671141	0	Pf3D7_09_v3	703368	703517	ID=PF3D7_0916800;Name=PF3D7_0916800;description=conserved+Plasmodium+protein%2C+unknown+function;size=150;web_id=PF3D7_0916800;locus_tag=PF3D7_0916800;size=150;Alias=PF3D7_0916800,9221967,PFI0823w,12368867,C0H541,225631823,CAX64218.1,PFI0823w,XP_002808937.1,296005211
0.0002468	0	0.00672646	0	Pf3D7_08_v3	1095116	1095562	ID=PF3D7_0825300;Name=PF3D7_0825300;description=conserved+protein%2C+unknown+function;size=447;web_id=PF3D7_0825300;locus_tag=PF3D7_0825300;size=447;Alias=11738814,PF3D7_0825300,CAD51120.1,23499040,Q8IB87,MAL8P1.26,124512276,MAL8P1.26,2655232,XP_001349271.1
0.0010096	0	0.0070922	0	Pf3D7_07_v3	931459	932164	ID=PF3D7_0721600;Name=PF3D7_0721600;description=40S+ribosomal+protein+S5%2C+putative;size=706;web_id=PF3D7_0721600;locus_tag=PF3D7_0721600;size=706;Alias=CAD50964.1,Q8IBN5,124511970,2655132,PF07_0088,PF07_0088,12368867,XP_001349118.1,23498886,ribosomeStruct,PF3D7_0721600
0.000321526	0	0.00735294	0	PFC10_API_IRAB	25594	25866	ID=PFC10_API0040;Name=PFC10_API0040;description=apicoplast+ribosomal+protein+S19+%28rps19%29;size=273;web_id=PFC10_API0040;locus_tag=PFC10_API0040;size=273;Alias=Rps19,PFC10_API0040,prokaryotes,gen_apic_genom,rps19,CAA64580.1,1171596,PFC10_API0040
0.00173695	0	0.0077821	0	Pf3D7_03_v3	302826	303083	ID=PF3D7_0306600;Name=PF3D7_0306600;description=conserved+Plasmodium+protein%2C+unknown+function;size=258;web_id=PF3D7_0306600;locus_tag=PF3D7_0306600;size=258;Alias=814384,Q9NLB1,10448855,12368867,15375386,PFC0281w,124504799,CAB89175.1,PF3D7_0306600,XP_001351142.1,PFC0281w
0.00231576	0	0.00955414	0	Pf3D7_08_v3	478512	478826	ID=PF3D7_0809500;Name=PF3D7_0809500;description=conserved+Plasmodium+protein%2C+unknown+function;size=315;web_id=PF3D7_0809500;locus_tag=PF3D7_0809500;size=315;Alias=PF3D7_0809500,296004979,XP_002808831.1,2655238,MAL8P1.114,225632225,C0H4T2,MAL8P1.114,CAX64108.1
0.00163091	0	0.00976709	0	Pf3D7_13_v3	2265817	2267148	ID=PF3D7_1357000;Name=PF3D7_1357000;description=elongation+factor+1-alpha;size=1332;web_id=PF3D7_1357000;locus_tag=PF3D7_1357000;size=1332;Alias=PF3D7_1357000,PF13_0304
0.0016154	0	0.0103093	0	Pf3D7_07_v3	437900	438094	ID=PF3D7_0709800;Name=PF3D7_0709800;description=conserved+Plasmodium+protein%2C+unknown+function;size=195;web_id=PF3D7_0709800;locus_tag=PF3D7_0709800;size=195;Alias=C0H4M4,MAL7P1.29a,296004838,MAL7P1.29a,225632155,MALP1.29a,XP_002808771.1,9221907,CAX64044.1,PF3D7_0709800
0.000777677	0	0.0128755	0	Pf3D7_13_v3	1042855	1043088	ID=PF3D7_1325000;Name=PF3D7_1325000;description=U6+snRNA-associated+Sm-like+protein+LSm6%2C+putative+%28LSM6%29;size=234;web_id=PF3D7_1325000;locus_tag=PF3D7_1325000;size=234;Alias=814113,P_body,XP_001349990.1,PF3D7_1325000,124513268,splicing,CAD52398.1,LSM6,mRNAdeg,Factors,PF13_0142,12368867,Q8IE68,23615407,PF13_0142
0.00309548	0	0.0135237	0	Pf3D7_13_v3	2268901	2270232	ID=PF3D7_1357100;Name=PF3D7_1357100;description=elongation+factor+1-alpha;size=1332;web_id=PF3D7_1357100;locus_tag=PF3D7_1357100;size=1332;Alias=XP_001350281.1,Factors,CAD52690.1,proteinBiosynth,CAD52691.1,redoxReg,12368867,124513852,PF13_0305,qualityControl,23615698,mRNAdeg,23615699,814268,PF13_0305,PF3D7_1357100,124513850,XP_001350282.1
0.000175346	0.00013151	0.00013151	1	Pf3D7_04_v3	946169	953773	ID=PF3D7_0420900;Name=PF3D7_0420900;description=erythrocyte+membrane+protein+1%2C+PfEMP1+%28VAR%29;size=7605;web_id=PF3D7_0420900;locus_tag=PF3D7_0420900;size=7605;Alias=VAR,PfEMP1,Q8IFQ5,4794161,23498273,PFD1000c,124505545,rosetting,CAD49244.1,MAL4P1.195,PF3D7_0420900,XP_001351514.1,PFD1000c,cytoadherencescheme
0.00016827	0.000190694	0.000953471	0.2	Pf3D7_14_v3	1064142	1069386	ID=PF3D7_1427300;Name=PF3D7_1427300;description=conserved+Plasmodium+protein%2C+unknown+function;size=5245;web_id=PF3D7_1427300;locus_tag=PF3D7_1427300;size=5245;Alias=PF3D7_1427300,23497320,811834,PF14_0252,124808856,Q8ILJ1,XP_001348426.1,12368864,AAN36865.1,PF14_0252
0.00097005	0.000280899	0.00196629	0.142857	Pf3D7_14_v3	1490654	1494214	ID=PF3D7_1436600;Name=PF3D7_1436600;description=cGMP-dependent+protein+kinase+%28PKG%29;size=3561;web_id=PF3D7_1436600;locus_tag=PF3D7_1436600;size=3561;Alias=20502828,PF3D7_1436600,AAM22644.1,124809222,PF14_0346,XP_001348520.1,AAN36959.1,PKG,23497415
0.000157322	0.000295683	0	Infinity	Pf3D7_05_v3	461017	464399	ID=PF3D7_0510800;Name=PF3D7_0510800;description=conserved+Plasmodium+protein%2C+unknown+function;size=3383;web_id=PF3D7_0510800;locus_tag=PF3D7_0510800;size=3383;Alias=PFE0540w,PFE0535w,PFE0535w,MAL5P1.109,12368867,812828,Q8I3Z7,MAL5P1.108,812830,PFE0540w,C0H4D3,PF3D7_0510800
0.00019935	0.000296648	0.00207654	0.142857	Pf3D7_05_v3	998753	1002124	ID=PF3D7_0524000;Name=PF3D7_0524000;description=karyopherin+beta+%28KASbeta%29;size=3372;web_id=PF3D7_0524000;locus_tag=PF3D7_0524000;size=3372;Alias=AAO85775.1,Q8I3M5,12368867,23504725,29501526,124506397,PFE1195w,CAD51603.1,import_export,PFE1195w,AF256227,XP_001351796.1,PF3D7_0524000,MAL5P1.239,813054,KASbeta
0.000945686	0.000298597	0.000597193	0.5	Pf3D7_02_v3	171563	174912	ID=PF3D7_0203800;Name=PF3D7_0203800;description=conserved+Plasmodium+protein%2C+unknown+function;size=3350;web_id=PF3D7_0203800;locus_tag=PF3D7_0203800;size=3350;Alias=812632,Q8I666,9804551,12368864,PFB0176c,PFB0177c,254688449,258596867,PF02_0035,PF02_0036,AAN37606.2,1400.t00202,1400.t00265,PF3D7_0203800,XP_001349550.2,PFB0177c
0.00110409	0.000306373	0.000919118	0.333333	Pf3D7_14_v3	1564575	1567839	ID=PF3D7_1438700;Name=PF3D7_1438700;description=small+subunit+DNA+primase;size=3265;web_id=PF3D7_1438700;locus_tag=PF3D7_1438700;size=3265;Alias=PF14_0366,3183127,1430925,Q25998.1,AAN36979.1,74876424,12368864,DNAgenes,PF3D7_1438700,dnareplication,Q7KQM1.1,PF14_0366,811948,XP_001348540.1,124809299,CAA67626.1,Q7KQM1,23497436
0.000367286	0.000322165	0.00128866	0.25	Pf3D7_13_v3	1955254	1958358	ID=PF3D7_1348700;Name=PF3D7_1348700;description=conserved+Plasmodium+protein%2C+unknown+function;size=3105;web_id=PF3D7_1348700;locus_tag=PF3D7_1348700;size=3105;Alias=MAL13P1.245,813805,PF3D7_1348700,Q8IDL2,MAL13P1.245
0.000636896	0.000324781	0.00194868	0.166667	Pf3D7_06_v3	908017	911096	ID=PF3D7_0622300;Name=PF3D7_0622300;description=conserved+Plasmodium+protein%2C+unknown+function;size=3080;web_id=PF3D7_0622300;locus_tag=PF3D7_0622300;size=3080;Alias=12368867,cat_phosph,3885854,CAG25036.1,2270.t00112,PF3D7_0622300,MAL6P1.205,C6KT60,XP_966206.1,86171411,46361172,PFF1075w,PFF1075w
0.000947391	0.000365631	0.000914077	0.4	Pf3D7_14_v3	936168	941638	ID=PF3D7_1423300;Name=PF3D7_1423300;description=serine%2Fthreonine+protein+phosphatase+%28PP7%29;size=5471;web_id=PF3D7_1423300;locus_tag=PF3D7_1423300;size=5471;Alias=phosphorylation,PF14_0224,XP_001348398.1,Q8ILL9,organizKinetochore,PF3D7_1423300,124808748,811806,Phos_tmd_exprs,23497291,PP7,protProphase,656744,AAN36837.1,PF14_0224
0.000526358	0.000367782	0.000735565	0.5	Pf3D7_13_v3	2332196	2334915	ID=PF3D7_1358900;Name=PF3D7_1358900;description=GTP+binding+protein%2C+putative;size=2720;web_id=PF3D7_1358900;locus_tag=PF3D7_1358900;size=2720;Alias=XP_002809086.1,MAL13P1.294,296005534,12368867,CAX64367.1,225632031,C0H5I9,MAL13P1.294,PF3D7_1358900,813857
5.60005e-05	0.000379795	0.00113938	0.333333	Pf3D7_08_v3	717113	719746	ID=PF3D7_0815200;Name=PF3D7_0815200;description=importin+beta%2C+putative;size=2634;web_id=PF3D7_0815200;locus_tag=PF3D7_0815200;size=2634;Alias=PF3D7_0815200,XP_001349372.1,12368867,2655268,PF08_0069,CAD51221.1,124512478,Q8IAY9,23499141,import_export,PF08_0069
0.000197238	0.000380952	0.00190476	0.2	Pf3D7_06_v3	815622	818247	ID=PF3D7_0619400;Name=PF3D7_0619400;description=cell+division+cycle+protein+48+homologue%2C+putative;size=2626;web_id=PF3D7_0619400;locus_tag=PF3D7_0619400;size=2626;Alias=12368867,PF3D7_0619400,2270.t00082,CAG25009.2,ProteasomeMeditated,PFF0940c,PFF0940c,3885942,MAL6P1.232,C6KT34,296004694,XP_966179.2,225631753
0.00122019	0.00039032	0.00156128	0.25	Pf3D7_12_v3	720886	723448	ID=PF3D7_1218400;Name=PF3D7_1218400;description=triose+or+hexose+phosphate%2Fphosphate+translocator%2C+putative;size=2563;web_id=PF3D7_1218400;locus_tag=PF3D7_1218400;size=2563;Alias=811230,PF3D7_1218400,258597491,XP_001350586.2,MAL12P1.178,12368864,transporters,AAN36266.2,PFL0890c,Q8I5M4,2277.t00178,254945373,PFL0890c
0.00101205	0.000399361	0.00119808	0.333333	Pf3D7_14_v3	2336649	2339153	ID=PF3D7_1457000;Name=PF3D7_1457000;description=signal+peptide+peptidase+%28SPP%29;size=2505;web_id=PF3D7_1457000;locus_tag=PF3D7_1457000;size=2505;Alias=223712827,223712829,ACN22086.1,SPP,223712821,255528896,258597872,ACN22088.1,ACN22089.1,223712825,proteases,PF3D7_1457000,223712823,812125,XP_001348717.2,Q8IKQ9,AAN37156.2,ACN22087.1,PF14_0543,ACN22090.1,eukaryotes,PF14_0543
0.00146478	0.000401445	0.00120434	0.333333	Pf3D7_13_v3	2465491	2467982	ID=PF3D7_1361500.1;Name=PF3D7_1361500.1;description=conserved+Plasmodium+protein%2C+unknown+function;size=2492;web_id=PF3D7_1361500.1;locus_tag=PF3D7_1361500.1;size=2492;Alias=225632043,813870,CAX64376.1,MAL13P1.306,MAL13P1.306,296005558,C0H5J8,PF3D7_1361500.1,XP_002809095.1
0.00146478	0.000401445	0.00120434	0.333333	Pf3D7_13_v3	2465491	2467982	ID=PF3D7_1361500.2;Name=PF3D7_1361500.2;description=conserved+Plasmodium+protein%2C+unknown+function;size=2492;web_id=PF3D7_1361500.2;locus_tag=PF3D7_1361500.2;size=2492;Alias=PF3D7_1361500.2
0.00126888	0.000404694	0	Infinity	Pf3D7_13_v3	2440438	2442909	ID=PF3D7_1360900;Name=PF3D7_1360900;description=polyadenylate-binding+protein%2C+putative;size=2472;web_id=PF3D7_1360900;locus_tag=PF3D7_1360900;size=2472;Alias=PF3D7_1360900
0.00115205	0.000408831	0.000408831	1	Pf3D7_02_v3	459072	461518	ID=PF3D7_0211400;Name=PF3D7_0211400;description=beta-ketoacyl-ACP+synthase+III+%28KASIII%29;size=2447;web_id=PF3D7_0211400;locus_tag=PF3D7_0211400;size=2447;Alias=486945,812702,KASIII,Q7KWI9,3746429,23503389,PFB0505c,124801164,PF02_0106,AAC63960.1,AAC71890.2,PF3D7_0211400,XP_001349620.1,apicoplastgene,PFB0505c,facidsynthesispath
0.00126325	0.000419639	0.00125892	0.333333	Pf3D7_13_v3	2350437	2352820	ID=PF3D7_1359200;Name=PF3D7_1359200;description=high+mobility+group+protein+4%2C+putative+%28HMGB4%29;size=2384;web_id=PF3D7_1359200;locus_tag=PF3D7_1359200;size=2384;Alias=813853,MAL13P1.290,12368867,HMGB4,Q8IDB5,NucleoAssembly,chrom_remod,MAL13P1.291,225632033,PF3D7_1359200,296005538,MAL13P1.290,XP_001350301.2,CAD52710.2
0.000571687	0.000423012	0.000846024	0.5	Pf3D7_14_v3	1077357	1079721	ID=PF3D7_1427400.1;Name=PF3D7_1427400.1;description=conserved+Plasmodium+membrane+protein%2C+unknown+function;size=2365;web_id=PF3D7_1427400.1;locus_tag=PF3D7_1427400.1;size=2365;Alias=AAN36866.2,XP_001348427.2,PF14_0253,PF3D7_1427400.1,258597730,Q8ILJ0,811835,12368864,255528816,PF14_0253
0.000571687	0.000423012	0.000846024	0.5	Pf3D7_14_v3	1077357	1079721	ID=PF3D7_1427400.2;Name=PF3D7_1427400.2;description=conserved+Plasmodium+membrane+protein%2C+unknown+function;size=2365;web_id=PF3D7_1427400.2;locus_tag=PF3D7_1427400.2;size=2365;Alias=PF3D7_1427400.2
0.00144331	0.000425894	0.000425894	1	Pf3D7_13_v3	961213	963561	ID=PF3D7_1322900;Name=PF3D7_1322900;description=conserved+Plasmodium+protein%2C+unknown+function;size=2349;web_id=PF3D7_1322900;locus_tag=PF3D7_1322900;size=2349;Alias=XP_002809029.1,12368867,CAX64310.1,813679,296005411,PF3D7_1322900,225631970,MAL13P1.129,C0H5D2,MAL13P1.129
0.00121687	0.000428816	0.000428816	1	Pf3D7_10_v3	1156648	1158980	ID=PF3D7_1027900;Name=PF3D7_1027900;description=DHHC-type+zinc+finger+protein%2C+putative;size=2333;web_id=PF3D7_1027900;locus_tag=PF3D7_1027900;size=2333;Alias=PF10_0273,Q8IJC5,810430,12368864,PF10_0273,254922470,AAN35470.2,258597123,prenylation,XP_001347557.2,PF3D7_1027900
0.000444132	0.000429185	0.000429185	1	Pf3D7_10_v3	1287715	1290045	ID=PF3D7_1032000;Name=PF3D7_1032000;description=mitochondrial+preribosomal+assembly+protein+rimM+precursor%2C+putative;size=2331;web_id=PF3D7_1032000;locus_tag=PF3D7_1032000;size=2331;Alias=XP_001347597.2,PF3D7_1032000,810470,11738814,Ribosomegenes,258597143,PF10_0313,PF10_0313,Q8IJ86,12368864,AAN35510.2,254922481
0.000340265	0.000430663	0	Infinity	Pf3D7_06_v3	1176265	1178587	ID=PF3D7_0628400;Name=PF3D7_0628400;description=conserved+Plasmodium+membrane+protein%2C+unknown+function;size=2323;web_id=PF3D7_0628400;locus_tag=PF3D7_0628400;size=2323;Alias=PFF1377w,C0H4H7,PF3D7_0628400,MAL6P1.144,9221870,PFF1377w,12368867
0.000706408	0.000431965	0	Infinity	Pf3D7_12_v3	1351789	1354104	ID=PF3D7_1232900;Name=PF3D7_1232900;description=nucleotidyltransferase%2C+putative;size=2316;web_id=PF3D7_1232900;locus_tag=PF3D7_1232900;size=2316;Alias=PFL1585c,811369,processing,124806440,mRNAcleavage,12368864,PFL1585c,XP_001350723.1,MAL12P1.316,PF3D7_1232900,2277.t00317,AAN36403.1,23496850,Q8I593
0.00135444	0.000432339	0.000864678	0.5	Pf3D7_07_v3	772951	775264	ID=PF3D7_0717900;Name=PF3D7_0717900;description=thioredoxin-like+protein;size=2314;web_id=PF3D7_0717900;locus_tag=PF3D7_0717900;size=2314;Alias=thioredoxinpath,Q8IBS1,23498850,CAD50927.1,MAL7P1.88,2655051,MAL7P1.88,PF3D7_0717900,redoxmetpath,124511898,XP_001349082.1
0.00135275	0.000434594	0.00304216	0.142857	Pf3D7_03_v3	422379	424680	ID=PF3D7_0310100;Name=PF3D7_0310100;description=calcium+dependent+protein+kinase+3+%28CDPK3%29;size=2302;web_id=PF3D7_0310100;locus_tag=PF3D7_0310100;size=2302;Alias=CDPK3,814416,Q9NJU9,7527460,23476982,60391918,PFC0420w,Q9NJU9.1,124504863,MAL3P3.17,AAF63154.1,CAB11118.4,calmodulin,PF3D7_0310100,XP_001351174.1,PFC0420w,Protein_kinases
0.000536949	0.0004363	0.0008726	0.5	Pf3D7_11_v3	207440	209732	ID=PF3D7_1104800;Name=PF3D7_1104800;description=metabolite%2Fdrug+transporter%2C+putative;size=2293;web_id=PF3D7_1104800;locus_tag=PF3D7_1104800;size=2293;Alias=Q8IIV4,PF11_0059,124803488,mitochonApico,11738814,810611,PPM,AAN35648.1,23495985,12368864,PF11_0059,transporters,XP_001347735.1,PF3D7_1104800
0.000907221	0.000442282	0.000884564	0.5	Pf3D7_06_v3	335107	337368	ID=PF3D7_0608000;Name=PF3D7_0608000;description=conserved+protein%2C+unknown+function;size=2262;web_id=PF3D7_0608000;locus_tag=PF3D7_0608000;size=2262;Alias=C6KSS8,12368867,3885837,86170716,CAG25250.1,PFF0395c,46362312,XP_966070.1,2270.t00233,MAL6P1.83,PFF0395c,PF3D7_0608000
0.000985687	0.000446628	0.00178651	0.25	Pf3D7_10_v3	1027128	1029367	ID=PF3D7_1024600;Name=PF3D7_1024600;description=conserved+Plasmodium+protein%2C+unknown+function;size=2240;web_id=PF3D7_1024600;locus_tag=PF3D7_1024600;size=2240;Alias=254922454,12368864,PF10_0240,Q8IJF8,258597101,810397,PF10_0239,PF3D7_1024600,PF10_0240,AAN35437.2,XP_001347524.2
0.00231893	0.000453721	0.000453721	1	Pf3D7_13_v3	226669	228873	ID=PF3D7_1304200.1;Name=PF3D7_1304200.1;description=CorA-like+Mg2++transporter+protein%2C+putative;size=2205;web_id=PF3D7_1304200.1;locus_tag=PF3D7_1304200.1;size=2205;Alias=transporters,MAL13P1.23,PPM,813788,C0H599,PF3D7_1304200.1
0.00231893	0.000453721	0.000453721	1	Pf3D7_13_v3	226669	228873	ID=PF3D7_1304200.2;Name=PF3D7_1304200.2;description=CorA-like+Mg2++transporter+protein%2C+putative;size=2205;web_id=PF3D7_1304200.2;locus_tag=PF3D7_1304200.2;size=2205;Alias=PF3D7_1304200.2,XP_002808996.1,CAX64277.1,225631932,296005335
0.00113424	0.000455996	0.000455996	1	Pf3D7_09_v3	919109	921302	ID=PF3D7_0922700;Name=PF3D7_0922700;description=pre-mRNA+splicing+factor%2C+putative;size=2194;web_id=PF3D7_0922700;locus_tag=PF3D7_0922700;size=2194;Alias=XP_001352098.1,PFI1115c,Q8I2S9,23505127,12368867,813503,PF3D7_0922700,124507002,CAD51909.1,splicing,PFI1115c
0.000560935	0.00045977	0.00045977	1	Pf3D7_12_v3	1433820	1435995	ID=PF3D7_1234300;Name=PF3D7_1234300;description=DNA+polymerase+epsilon+subunit+b%2C+putative;size=2176;web_id=PF3D7_1234300;locus_tag=PF3D7_1234300;size=2176;Alias=12368864,baseExcision,124806489,ExcisionRepairTab,Q8I579,AAN36417.1,2277.t00331,MAL12P1.330,PFL1655c,PFL1655c,XP_001350737.1,PF3D7_1234300,811383,23496864,643632
0.00218508	0.000459982	0.000459982	1	Pf3D7_04_v3	665973	668147	ID=PF3D7_0414900;Name=PF3D7_0414900;description=conserved+ARM+repeats+protein%2C+unknown+function;size=2175;web_id=PF3D7_0414900;locus_tag=PF3D7_0414900;size=2175;Alias=812562,C0H4A5,12368867,PFD0720w,225631637,296004422,CAX63923.1,MAL4P1.139,centrosome,PF3D7_0414900,XP_002808653.1,PFD0720w
0.00222538	0.000464684	0.000929368	0.5	Pf3D7_07_v3	684539	686691	ID=PF3D7_0715300;Name=PF3D7_0715300;description=calcium%2Fcalmodulin-dependent+protein+kinase%2C+putative;size=2153;web_id=PF3D7_0715300;locus_tag=PF3D7_0715300;size=2153;Alias=Q8IBU7,PF3D7_0715300,2655022,calmodulin,MAL7P1.73,Protein_kinases,MAL7P1.73,12368867
0.000557359	0.0004649	0.0004649	1	Pf3D7_05_v3	683708	685859	ID=PF3D7_0516500;Name=PF3D7_0516500;description=metabolite%2Fdrug+transporter%2C+putative;size=2152;web_id=PF3D7_0516500;locus_tag=PF3D7_0516500;size=2152;Alias=CAX63963.1,res_antimal,12368867,PF3D7_0516500,PFE0825w,transporters,225631677,C0H4E1,MAL5P1.165,296004542,PFE0825w,XP_002808692.1,PPM,812980
0.00142097	0.000465116	0.00186047	0.25	Pf3D7_08_v3	534469	536619	ID=PF3D7_0810500;Name=PF3D7_0810500;description=protein+phosphatase%2C+putative;size=2151;web_id=PF3D7_0810500;locus_tag=PF3D7_0810500;size=2151;Alias=23499190,Phos_tmd_exprs,CAD51270.1,MAL8P1.108,124512576,MAL8P1.108,2655394,12368867,Q8IAU0,phosphorylation,PF3D7_0810500,Pfal004964AAA,XP_001349421.1
0.00118813	0.000468823	0.000468823	1	Pf3D7_14_v3	553639	555772	ID=PF3D7_1414000;Name=PF3D7_1414000;description=conserved+protein%2C+unknown+function;size=2134;web_id=PF3D7_1414000;locus_tag=PF3D7_1414000;size=2134;Alias=PF3D7_1414000,Q8ILV5,XP_001348311.2,811719,255528780,AAN36750.2,12368864,PF14_0138,PF14_0138,1396.t00644,258597671
0.00186393	0.000469043	0	Infinity	Pf3D7_14_v3	1184910	1187042	ID=PF3D7_1430100;Name=PF3D7_1430100;description=phosphotyrosyl+phosphatase+activator%2C+putative;size=2133;web_id=PF3D7_1430100;locus_tag=PF3D7_1430100;size=2133;Alias=12368864,PF14_0280,XP_001348454.1,12368867,PF3D7_1430100,AAN36893.1,811862,PF14_0280,Q8ILG3,centrosome,23497348,124808967
3.47616e-05	0.000473709	0.000473709	1	Pf3D7_06_v3	559349	561460	ID=PF3D7_0613700;Name=PF3D7_0613700;description=syntaxin+binding+protein%2C+putative;size=2112;web_id=PF3D7_0613700;locus_tag=PF3D7_0613700;size=2112;Alias=PFF0665c,MAL6P1.288,PFF0665c,apoptosis,3885715,vesExocytosis,86170983,2270.t00027,PF3D7_0613700,12368867,CAG25376.1,C6KSX9,XP_966124.1,46361089
0.000674397	0.000477783	0.00191113	0.25	Pf3D7_12_v3	1873194	1875287	ID=PF3D7_1244800;Name=PF3D7_1244800;description=cytoplasmic+translation+machinery+associated+protein%2C+putative;size=2094;web_id=PF3D7_1244800;locus_tag=PF3D7_1244800;size=2094;Alias=MAL12P1.428,XP_001350834.1,2277.t00430,Ribosomegenes,Q8I4Y3,AAN36514.1,PF3D7_1244800,PFL2150c,23496963,811482,124806797,PFL2150c,12368864
0.000321115	0.000480769	0.000480769	1	Pf3D7_11_v3	810210	812290	ID=PF3D7_1121400;Name=PF3D7_1121400;description=WD+domain%2C+G-beta+repeat-containing+protein;size=2081;web_id=PF3D7_1121400;locus_tag=PF3D7_1121400;size=2081;Alias=Q8IIF2,PF3D7_1121400,254832648,PF11_0222,PF11_0221,810769,XP_001347893.2,PF11_0222,12368864,AAN35806.2,258597294
0.00163674	0.000481232	0.000962464	0.5	Pf3D7_14_v3	130022	132100	ID=PF3D7_1403500;Name=PF3D7_1403500;description=conserved+Plasmodium+protein%2C+unknown+function;size=2079;web_id=PF3D7_1403500;locus_tag=PF3D7_1403500;size=2079;Alias=C6S3H4,255528754,PF3D7_1403500,258549178,XP_002585450.1,8445018,ACU12398.1,PF14_0810,PF14_0810,12368864
0.000397709	0.000482393	0	Infinity	Pf3D7_05_v3	817066	819139	ID=PF3D7_0519700;Name=PF3D7_0519700;description=conserved+Plasmodium+protein%2C+unknown+function;size=2074;web_id=PF3D7_0519700;locus_tag=PF3D7_0519700;size=2074;Alias=225631689,MAL5P1.198,C0H4F1,PF3D7_0519700,XP_002808702.1,12368867,PFE0990w,813013,296004566,CAX63973.1,PFE0990w
0.00145539	0.000484027	0.00242014	0.2	Pf3D7_09_v3	383650	385716	ID=PF3D7_0908300.1;Name=PF3D7_0908300.1;description=conserved+Plasmodium+membrane+protein%2C+unknown+function;size=2067;web_id=PF3D7_0908300.1;locus_tag=PF3D7_0908300.1;size=2067;Alias=PFI0400c,296005177,225631806,PFI0400c,C0H526,CAX64203.1,813360,12368867,XP_002808922.1,PF3D7_0908300.1
0.00145539	0.000484027	0.00242014	0.2	Pf3D7_09_v3	383650	385716	ID=PF3D7_0908300.2;Name=PF3D7_0908300.2;description=conserved+Plasmodium+membrane+protein%2C+unknown+function;size=2067;web_id=PF3D7_0908300.2;locus_tag=PF3D7_0908300.2;size=2067;Alias=PF3D7_0908300.2
0.0010197	0.000484731	0.000969462	0.5	Pf3D7_13_v3	1477961	1480024	ID=PF3D7_1336400;Name=PF3D7_1336400;description=glucose-induced+degradation+protein+8%2C+putative+%28GID8%29;size=2064;web_id=PF3D7_1336400;locus_tag=PF3D7_1336400;size=2064;Alias=PF3D7_1336400,MAL13P1.182,124513474,23615510,813737,MAL13P1.182,Q8IDW7,GID8,CAD52502.1,XP_001350093.1
0.00121033	0.000484966	0.000484966	1	Pf3D7_14_v3	759360	761422	ID=PF3D7_1418000;Name=PF3D7_1418000;description=ubiquitin+fusion+degradation+protein+UFD1%2C+putative+%28UFD1%29;size=2063;web_id=PF3D7_1418000;locus_tag=PF3D7_1418000;size=2063;Alias=AAN36790.2,XP_001348351.2,UFD1,PF3D7_1418000,PF14_0178,258597686,Q8ILR6,PF14_0178,1396.t00605,255528789,ProteasomeMeditated,811759
0.00199001	0.000484966	0.0014549	0.333333	Pf3D7_14_v3	1919583	1921645	ID=PF3D7_1446700;Name=PF3D7_1446700;description=conserved+Plasmodium+protein%2C+unknown+function;size=2063;web_id=PF3D7_1446700;locus_tag=PF3D7_1446700;size=2063;Alias=AAN37057.2,258597827,264675902,255528868,PF14_0445,12368864,812026,PF14_0444,PF3D7_1446700,XP_001348618.2,Q8IL06,Q8IL06.2,PF14_0444
0.000696612	0.000486145	0.00097229	0.5	Pf3D7_06_v3	1213948	1216005	ID=PF3D7_0629500;Name=PF3D7_0629500;description=amino+acid+transporter%2C+putative;size=2058;web_id=PF3D7_0629500;locus_tag=PF3D7_0629500;size=2058;Alias=MAL6P1.133,CAG25107.1,transporters,3885735,PFF1430c,hemoglobinpolpath,2270.t00183,XP_966277.1,PF3D7_0629500,86171779,PPM,PFF1430c,C6KTD0,12368867,46361246
0.00112545	0.000486381	0.00194553	0.25	Pf3D7_09_v3	786156	788212	ID=PF3D7_0919100;Name=PF3D7_0919100;description=DnaJ+protein%2C+putative;size=2057;web_id=PF3D7_0919100;locus_tag=PF3D7_0919100;size=2057;Alias=124506930,CAD51873.1,Q8I2W2,PFI0935w,813467,XP_001352062.1,PF3D7_0919100,23505091,Pf_chaperones,12368867,chapfold,PFI0935w
0.00119389	0.000487329	0.000974659	0.5	Pf3D7_13_v3	655207	657259	ID=PF3D7_1315600;Name=PF3D7_1315600;description=phosphatidylinositol+synthase+%28PIS%29;size=2053;web_id=PF3D7_1315600;locus_tag=PF3D7_1315600;size=2053;Alias=C0H5B7,PIS,PF3D7_1315600,MAL13P1.82,CAX64295.1,296005379,inosiPhosphmetpath,813973,ABC58672.1,12368867,MAL13P1.82,XP_002809014.1,84380268,225631954
0.000137637	0.000488281	0.000976562	0.5	Pf3D7_07_v3	646719	648767	ID=PF3D7_0714100;Name=PF3D7_0714100;description=conserved+Plasmodium+protein%2C+unknown+function;size=2049;web_id=PF3D7_0714100;locus_tag=PF3D7_0714100;size=2049;Alias=124511828,PF07_0055,23498815,XP_001349047.1,Q8IBV6,CAD50892.1,2655099,PF3D7_0714100,PF07_0055
0.00164888	0.000488998	0.000488998	1	Pf3D7_14_v3	1095686	1097731	ID=PF3D7_1428000;Name=PF3D7_1428000;description=conserved+Plasmodium+membrane+protein%2C+unknown+function;size=2046;web_id=PF3D7_1428000;locus_tag=PF3D7_1428000;size=2046;Alias=12368864,AAN36871.2,PF14_0258,255528818,XP_001348432.2,PF3D7_1428000,PF14_0258,Q8ILI5,258597732,811840
0.000543966	0.000493097	0.000493097	1	Pf3D7_13_v3	1209744	1211772	ID=PF3D7_1328600;Name=PF3D7_1328600;description=conserved+Plasmodium+protein%2C+unknown+function;size=2029;web_id=PF3D7_1328600;locus_tag=PF3D7_1328600;size=2029;Alias=MAL13P1.149,225631986,C0H5E7,296005444,MAL13P1.149,XP_002809044.1,813700,CAX64325.1,PF3D7_1328600
9.08762e-05	0.00049554	0.00148662	0.333333	Pf3D7_06_v3	453671	455689	ID=PF3D7_0610800;Name=PF3D7_0610800;description=transketolase+%28TK%29;size=2019;web_id=PF3D7_0610800;locus_tag=PF3D7_0610800;size=2019;Alias=C6KSV3,86170850,2270.t00206,ppcpath,3885924,PFF0530w,TK,XP_966097.1,PFF0530w,CAG25349.1,thiaminemetpath,MAL6P1.110,PF3D7_0610800,46361062
0.00131046	0.0004995	0	Infinity	Pf3D7_07_v3	854652	856654	ID=PF3D7_0719500;Name=PF3D7_0719500;description=conserved+membrane+protein%2C+unknown+function;size=2003;web_id=PF3D7_0719500;locus_tag=PF3D7_0719500;size=2003;Alias=PF07_0078,PF3D7_0719500,2655122,PF07_0078,Q8IBQ7
0.000154215	0.000501002	0.00150301	0.333333	Pf3D7_10_v3	627044	629040	ID=PF3D7_1015600;Name=PF3D7_1015600;description=heat+shock+protein+60+%28HSP60%29;size=1997;web_id=PF3D7_1015600;locus_tag=PF3D7_1015600;size=1997;Alias=PF10_0153,Pf_chaperones,AAN35351.1,PF3D7_1015600,nuclearGenes,124802320,PF10_0153,XP_001347438.1,12368864,HSP60,tubulin,chapfold,23495018,12368867,chaperone,810311,Q8IJN9
0.000752473	0.000502765	0.00100553	0.5	Pf3D7_14_v3	1127042	1129031	ID=PF3D7_1428600;Name=PF3D7_1428600;description=peptide+chain+release+factor+1%2C+putative;size=1990;web_id=PF3D7_1428600;locus_tag=PF3D7_1428600;size=1990;Alias=PF14_0265,XP_001348439.1,811847,12368864,Q8ILH8,11738814,PF14_0265,apicoplastgene,proteinBiosynth,AAN36878.1,23497333,PF3D7_1428600,124808906
0.00108349	0.000506073	0.00303644	0.166667	Pf3D7_12_v3	1805380	1807356	ID=PF3D7_1242800;Name=PF3D7_1242800;description=rab+specific+GDP+dissociation+inhibitor+%28rabGDI%29;size=1977;web_id=PF3D7_1242800;locus_tag=PF3D7_1242800;size=1977;Alias=rabCycle,2277.t00412,rabGDI,12368867,PF3D7_1242800,23496945,MAL12P1.410,124806735,Q8I501,PFL2060c,811464,XP_001350816.1,endos_mat,12368864,PFL2060c,AAN36496.1
0.00017401	0.000506842	0.00152053	0.333333	Pf3D7_13_v3	2713463	2715436	ID=PF3D7_1368200;Name=PF3D7_1368200;description=RNAse+L+inhibitor+protein%2C+putative;size=1974;web_id=PF3D7_1368200;locus_tag=PF3D7_1368200;size=1974;Alias=PF3D7_1368200,124514072,CAD52801.1,813912,23615809,XP_001350392.1,Q8I6Z4,MAL13P1.344,SprotTab,MAL13P1.344
0.000923184	0.000510986	0.00255493	0.2	Pf3D7_14_v3	396010	397967	ID=PF3D7_1410100;Name=PF3D7_1410100;description=alpha%2Fbeta+hydrolase%2C+putative;size=1958;web_id=PF3D7_1410100;locus_tag=PF3D7_1410100;size=1958;Alias=AAN36711.1,811680,PF3D7_1410100,PF14_0099,XP_001348272.1,12368864,proteases,124808263,23497163,Q8ILZ4,PF14_0099
0.000371347	0.000517331	0.000517331	1	Pf3D7_07_v3	755763	757696	ID=PF3D7_0717500;Name=PF3D7_0717500;description=calcium+dependent+protein+kinase+4+%28CDPK4%29;size=1934;web_id=PF3D7_0717500;locus_tag=PF3D7_0717500;size=1934;Alias=Q8IBS5.3,2655116,PF07_0072,PF3D7_0717500,Protein_kinases,CDPK4,124511890,PF07_0072,Q8IBS5,23498846,XP_001349078.1,60391913,CAD50923.1,calmodulin
0.00292519	0.000517331	0.000517331	1	Pf3D7_06_v3	1252052	1253985	ID=PF3D7_0630000;Name=PF3D7_0630000;description=CPW-WPC+family+protein;size=1934;web_id=PF3D7_0630000;locus_tag=PF3D7_0630000;size=1934;Alias=3885753,PFF1455c,PF3D7_0630000,225631777,C6KTD5,XP_966282.2,PFF1455c,CAG25112.2,2270.t00188,296004742,12368867,MAL6P1.128
0.00121729	0.000518135	0	Infinity	Pf3D7_13_v3	2719490	2721420	ID=PF3D7_1368400;Name=PF3D7_1368400;description=conserved+Plasmodium+protein%2C+unknown+function;size=1931;web_id=PF3D7_1368400;locus_tag=PF3D7_1368400;size=1931;Alias=PF13_0356,Q8ID26,XP_001350394.1,PF13_0356,PF3D7_1368400,23615811,CAD52803.1,124514076,814315
9.47902e-05	0.000518672	0.00155602	0.333333	Pf3D7_09_v3	822665	824593	ID=PF3D7_0920000;Name=PF3D7_0920000;description=long+chain+fatty+acid+elongation+enzyme%2C+putative;size=1929;web_id=PF3D7_0920000;locus_tag=PF3D7_0920000;size=1929;Alias=C0H545,296005219,sphingometpath,813476,XP_002808941.1,gen_phosph,facidsynthesispath,PFI0980w,225631827,PF3D7_0920000,PFI0980w,CAX64222.1,12368867
0.00160233	0.000521376	0.00208551	0.25	Pf3D7_14_v3	1260908	1262826	ID=PF3D7_1432100;Name=PF3D7_1432100;description=conserved+protein%2C+unknown+function;size=1919;web_id=PF3D7_1432100;locus_tag=PF3D7_1432100;size=1919;Alias=23497370,12368864,PF14_0301,Q8ILE3,811883,AAN36914.1,PF14_0301,124809039,apoptosis,XP_001348475.1,nuclearGenes,transporters,PF3D7_1432100,chaperone
0.000533483	0.000524521	0.0013113	0.4	Pf3D7_13_v3	760326	764139	ID=PF3D7_1318400;Name=PF3D7_1318400;description=chromosome+segregation+protein%2C+putative;size=3814;web_id=PF3D7_1318400;locus_tag=PF3D7_1318400;size=3814;Alias=Q8IED2.1,XP_001349920.1,Q8IED2,MAL13P1.96,protProphase,23615337,PF3D7_1318400,813987,CAD52328.1,MAL13P1.96,124513128,75015734,12368867
0.000117122	0.000528541	0.00105708	0.5	Pf3D7_13_v3	333597	335489	ID=PF3D7_1307300;Name=PF3D7_1307300;description=DEAD+box+helicase%2C+putative;size=1893;web_id=PF3D7_1307300;locus_tag=PF3D7_1307300;size=1893;Alias=PF3D7_1307300,23615217,XP_001349800.1,12368867,PF13_0037,PF13_0037,814016,splicing,124512888,CAD52207.1,Q8IEP2
0.000373392	0.000529661	0.000529661	1	Pf3D7_10_v3	1574060	1575948	ID=PF3D7_1039100;Name=PF3D7_1039100;description=DnaJ+protein%2C+putative%2C+pseudogene;size=1889;web_id=PF3D7_1039100;locus_tag=PF3D7_1039100;size=1889;Alias=PF10_0381,810538,12368864,PF10_0381,PF3D7_1039100,Pf_chaperones,Q8IJ20
0.000476695	0.000530504	0.00371353	0.142857	Pf3D7_09_v3	222271	224156	ID=PF3D7_0904800;Name=PF3D7_0904800;description=replication+protein+A1%2C+small+fragment;size=1886;web_id=PF3D7_0904800;locus_tag=PF3D7_0904800;size=1886;Alias=23504949,12368867,Q8I3A1,PFI0235w,813327,124506649,CAD51733.1,DNAgenes,PFI0235w,PF3D7_0904800,XP_001351922.1
0.000571468	0.000532481	0.000532481	1	Pf3D7_11_v3	105357	107235	ID=PF3D7_1102200;Name=PF3D7_1102200;description=DnaJ+protein%2C+putative;size=1879;web_id=PF3D7_1102200;locus_tag=PF3D7_1102200;size=1879;Alias=12368864,AAN35623.1,Q8IIX8,23495960,PF11_0034,124803420,PF11_0034,PF3D7_1102200,XP_001347710.1,810586,Pf_chaperones
0.000850484	0.000532765	0.00106553	0.5	Pf3D7_12_v3	1085387	1087264	ID=PF3D7_1226800;Name=PF3D7_1226800;description=conserved+Plasmodium+protein%2C+unknown+function;size=1878;web_id=PF3D7_1226800;locus_tag=PF3D7_1226800;size=1878;Alias=proteasome_new,PF3D7_1226800,11738814,proteaUbiqpath,proteases,PFL1295w,811311,PFL1295w,2277.t00259,Q8I5F0,23496791,AAN36345.1,XP_001350665.1,124806234,12368864,ProteasomeMeditated,MAL12P1.259
0.00164206	0.000533049	0.0021322	0.25	Pf3D7_08_v3	767916	769792	ID=PF3D7_0816800;Name=PF3D7_0816800;description=meiotic+recombination+protein+dmc1-like+protein;size=1877;web_id=PF3D7_0816800;locus_tag=PF3D7_0816800;size=1877;Alias=AAK43698.1,CAD51205.2,XP_001349356.2,MAL8P1.76,MAL8P1.76,296005023,dsbRecomb,13876949,2655426,12368867,Q8IB05,PF3D7_0816800,225632246
0.000827511	0.000535332	0.00214133	0.25	Pf3D7_02_v3	139324	141192	ID=PF3D7_0202900;Name=PF3D7_0202900;description=zinc+finger+protein%2C+putative;size=1869;web_id=PF3D7_0202900;locus_tag=PF3D7_0202900;size=1869;Alias=812624,O96132,9804551,12368864,PFB0140w,PF02_0028,PF3D7_0202900,PFB0140w
0.000460412	0.000540249	0.00162075	0.333333	Pf3D7_06_v3	1020024	1021875	ID=PF3D7_0625000.1;Name=PF3D7_0625000.1;description=phosphatidic+acid+phosphatase+%28PAP%29;size=1852;web_id=PF3D7_0625000.1;locus_tag=PF3D7_0625000.1;size=1852;Alias=2270.t00137,3885980,PFF1210w,PAP,MAL6P1.178,PFF1210w,utilPhospho,PF3D7_0625000.1,sphingometpath,C6KT86
0.000460412	0.000540249	0.00162075	0.333333	Pf3D7_06_v3	1020024	1021875	ID=PF3D7_0625000.2;Name=PF3D7_0625000.2;description=phosphatidic+acid+phosphatase;size=1852;web_id=PF3D7_0625000.2;locus_tag=PF3D7_0625000.2;size=1852;Alias=46361199,PF3D7_0625000.2,86171546,CAG25063.1,XP_966233.1
0.000295789	0.000542152	0.00352399	0.153846	Pf3D7_07_v3	293400	297089	ID=PF3D7_0706000;Name=PF3D7_0706000;description=conserved+Plasmodium+protein%2C+unknown+function;size=3690;web_id=PF3D7_0706000;locus_tag=PF3D7_0706000;size=3690;Alias=225632142,MAL7P1.202,9221896,MAL7P1.202,296004812,PF3D7_0706000,XP_002808758.1,CAX64031.1,C0H4L1
0.000599013	0.000544514	0.00163354	0.333333	Pf3D7_06_v3	784354	788027	ID=PF3D7_0618900;Name=PF3D7_0618900;description=N-acetylglucosamine+transferase+%28GPI1%29;size=3674;web_id=PF3D7_0618900;locus_tag=PF3D7_0618900;size=3674;Alias=MAL6P1.238,PFF0915w,AJ249657,2270.t00076,gpiAnchor1path,296004688,C6KT29,PFF0915w,12368867,GPI1,XP_966174.2,225631750,3885848,PF3D7_0618900,CAG25004.2
0.000101041	0.000544662	0.00163399	0.333333	Pf3D7_08_v3	978798	980634	ID=PF3D7_0822000;Name=PF3D7_0822000;description=mitochondrial+ribosomal+protein+L4+precursor%2C+putative;size=1837;web_id=PF3D7_0822000;locus_tag=PF3D7_0822000;size=1837;Alias=PF08_0038,Q8IB54,CAD51154.1,PF08_0038,ribosomeStruct,2655489,XP_001349305.1,124512344,nuclearGenes,23499074,PF3D7_0822000
0.000371459	0.000546747	0.00109349	0.5	Pf3D7_12_v3	1532248	1534077	ID=PF3D7_1236800;Name=PF3D7_1236800;description=protein-S-isoprenylcysteine+O-methyltransferase%2C+putative;size=1830;web_id=PF3D7_1236800;locus_tag=PF3D7_1236800;size=1830;Alias=apicoplastgene,11738814,258597559,2277.t00356,Q8I555,254945411,PFL1780w,PF3D7_1236800,terpenoid,AAN36442.2,12368864,PFL1780w,MAL12P1.354,12368868,811408,XP_001350762.2
0.000450306	0.000548246	0.00219298	0.25	Pf3D7_09_v3	373762	375586	ID=PF3D7_0908100;Name=PF3D7_0908100;description=conserved+Plasmodium+membrane+protein%2C+unknown+function;size=1825;web_id=PF3D7_0908100;locus_tag=PF3D7_0908100;size=1825;Alias=PFI0390c,PFI0390c,11738814,12368867,PF3D7_0908100,C0H525,813358
0.000432635	0.000558815	0.00195585	0.285714	Pf3D7_02_v3	235237	238816	ID=PF3D7_0205900;Name=PF3D7_0205900;description=proteasome+26S+regulatory+subunit%2C+putative;size=3580;web_id=PF3D7_0205900;locus_tag=PF3D7_0205900;size=3580;Alias=812651,O96153,9804551,12368864,12368867,PFB0260w,254688456,258596875,PF02_0055,AAC71841.3,PF3D7_0205900,XP_001349569.2,PFB0260w,proteaUbiqpath,proteasome_new
0.000884687	0.000561167	0	Infinity	Pf3D7_02_v3	622524	624306	ID=PF3D7_0215100;Name=PF3D7_0215100;description=RING+zinc+finger+protein%2C+putative;size=1783;web_id=PF3D7_0215100;locus_tag=PF3D7_0215100;size=1783;Alias=812738,Q8I660,9804551,12368864,PFB0687c,254688480,258596919,PF02_0142,AAN37612.2,PF3D7_0215100,XP_001349656.2,PFB0687c,proteaUbiqpath,proteasome_new
0.00101779	0.000561798	0.0011236	0.5	Pf3D7_06_v3	1180573	1182353	ID=PF3D7_0628600;Name=PF3D7_0628600;description=conserved+Plasmodium+protein%2C+unknown+function;size=1781;web_id=PF3D7_0628600;locus_tag=PF3D7_0628600;size=1781;Alias=chrom_remod,PFF1385c,MAL6P1.142,PF3D7_0628600,C6KTC1,XP_966268.1,3885726,CAG25098.1,46361237,PFF1385c,86171732,2270.t00174,12368867
0.00010318	0.00056243	0.00224972	0.25	Pf3D7_14_v3	929503	931281	ID=PF3D7_1423100;Name=PF3D7_1423100;description=ankyrin%2C+putative;size=1779;web_id=PF3D7_1423100;locus_tag=PF3D7_1423100;size=1779;Alias=12368864,23497289,PF14_0222,PF14_0222,XP_001348396.1,PF3D7_1423100,AAN36835.1,124808739,Q8ILM1,811804
0.000347153	0.000564016	0.000564016	1	Pf3D7_02_v3	566121	567894	ID=PF3D7_0214000;Name=PF3D7_0214000;description=T-complex+protein+1%2C+putative;size=1774;web_id=PF3D7_0214000;locus_tag=PF3D7_0214000;size=1774;Alias=812727,O96220,9804551,12368864,12368867,PFB0635w,chapfold,254688476,258596910,PF02_0131,AAC71916.3,centrosome,PF3D7_0214000,Pf_chaperones,XP_001349645.2,PFB0635w
0.00154715	0.000564972	0.00112994	0.5	Pf3D7_14_v3	3060864	3062634	ID=PF3D7_1474600;Name=PF3D7_1474600;description=conserved+Plasmodium+membrane+protein%2C+unknown+function;size=1771;web_id=PF3D7_1474600;locus_tag=PF3D7_1474600;size=1771;Alias=812296,PF14_0714,AAN37327.1,12368864,XP_001348888.1,23497790,PF3D7_1474600,Q8IK92,PF14_0714,124810474
0.00173644	0.000567537	0.00113507	0.5	Pf3D7_12_v3	1333134	1334896	ID=PF3D7_1232200;Name=PF3D7_1232200;description=lipoamide+dehydrogenase+%28mLipDH%29;size=1763;web_id=PF3D7_1232200;locus_tag=PF3D7_1232200;size=1763;Alias=glycineSerinemetpath,pyruvatemetpath,12368867,2277.t00310,12368864,comp_redox,Q8I5A0,antioxidantSystem,XP_001350716.2,MAL12P1.310,mitochondrTCAcycle,258597537,LeuIsoValmetpath,AAN36396.2,mLipDH,SHAMTandGCV,PFL1550w,811362,656835,PF3D7_1232200,…
0.00323832	0.000570451	0.0022818	0.25	Pf3D7_09_v3	680231	681984	ID=PF3D7_0916300;Name=PF3D7_0916300;description=conserved+Plasmodium+protein%2C+unknown+function;size=1754;web_id=PF3D7_0916300;locus_tag=PF3D7_0916300;size=1754;Alias=Q8I2Y9,PFI0800c,12368867,PF3D7_0916300,813440,PFI0800c
8.30263e-05	0.000571102	0.0011422	0.5	Pf3D7_13_v3	1679693	1681444	ID=PF3D7_1342800;Name=PF3D7_1342800;description=phosphoenolpyruvate+carboxykinase+%28PEPCK%29;size=1752;web_id=PF3D7_1342800;locus_tag=PF3D7_1342800;size=1752;Alias=Q8IDR1,pyruvatemetpath,PF13_0234,PEPCK,CAD52558.1,124513586,6469622,23615566,AAF13359.1,814201,653170,PF3D7_1342800,XP_001350149.1,PF13_0234
0.000927289	0.000571429	0.00228571	0.25	Pf3D7_08_v3	188566	190316	ID=PF3D7_0802700;Name=PF3D7_0802700;description=conserved+Plasmodium+protein%2C+unknown+function;size=1751;web_id=PF3D7_0802700;locus_tag=PF3D7_0802700;size=1751;Alias=MAL8P1.149,MAL8P1.149,PF3D7_0802700,2655395,Q8IAM7,XP_001349487.1,CAD51336.1,124512708,23499256
0.00107004	0.000572082	0.000572082	1	Pf3D7_11_v3	792197	793945	ID=PF3D7_1121000;Name=PF3D7_1121000;description=zinc+finger%2C+DHHC-type%2C+putative;size=1749;web_id=PF3D7_1121000;locus_tag=PF3D7_1121000;size=1749;Alias=PF11_0217,AAN35801.2,258597286,Q8IIF7,PF3D7_1121000,12368864,PF11_0217,810764,XP_001347888.2,254832644
0.00160491	0.000573066	0.000573066	1	Pf3D7_09_v3	1012118	1013863	ID=PF3D7_0925000;Name=PF3D7_0925000;description=conserved+Plasmodium+protein%2C+unknown+function;size=1746;web_id=PF3D7_0925000;locus_tag=PF3D7_0925000;size=1746;Alias=12368867,813525,225631842,PFI1225w,PFI1225w,296005249,PF3D7_0925000,CAX64237.1,XP_002808956.1,C0H560
0.000309458	0.000574713	0.00229885	0.25	Pf3D7_04_v3	403626	405366	ID=PF3D7_0408300;Name=PF3D7_0408300;description=zinc+finger%2C+RAN+binding+protein%2C+putative;size=1741;web_id=PF3D7_0408300;locus_tag=PF3D7_0408300;size=1741;Alias=812358,Q9U0K3,8248750,12368867,PFD0405c,PFD0405w,124505311,MAL4P2.19,CAB62860.2,PF3D7_0408300,import_export,XP_001351397.1,PFD0405c
8.43954e-05	0.000575043	0.00172513	0.333333	Pf3D7_07_v3	963370	965109	ID=PF3D7_0722800;Name=PF3D7_0722800;description=conserved+Plasmodium+protein%2C+unknown+function;size=1740;web_id=PF3D7_0722800;locus_tag=PF3D7_0722800;size=1740;Alias=23498897,PF07_0094,XP_001349129.1,124511992,CAD50975.1,PF3D7_0722800,2655138,Q8IBM5,PF07_0094
0.000294609	0.000575043	0.00172513	0.333333	Pf3D7_14_v3	1458131	1459870	ID=PF3D7_1436000;Name=PF3D7_1436000;description=glucose-6-phosphate+isomerase+%28GPI%29;size=1740;web_id=PF3D7_1436000;locus_tag=PF3D7_1436000;size=1740;Alias=PF14_0341,PF3D7_1436000,2866,XP_001348515.1,PF14_0341,12368867,811923,glycolysispath,12368864,124809201,23497410,GPI,Q8ILA4,AAN36954.1
0.000109484	0.000576037	0.00230415	0.25	Pf3D7_09_v3	307303	309039	ID=PF3D7_0906200;Name=PF3D7_0906200;description=conserved+Plasmodium+protein%2C+unknown+function;size=1737;web_id=PF3D7_0906200;locus_tag=PF3D7_0906200;size=1737;Alias=124506677,813341,CAD51747.1,11738814,Q8I387,PF3D7_0906200,XP_001351936.1,23504963,PFI0305c,12368867,PFI0305c
0.000738635	0.000577701	0.0011554	0.5	Pf3D7_13_v3	1925049	1926780	ID=PF3D7_1348100;Name=PF3D7_1348100;description=GTPase%2C+putative;size=1732;web_id=PF3D7_1348100;locus_tag=PF3D7_1348100;size=1732;Alias=rabIntracellular,redoxReg,CAD52603.1,PF3D7_1348100,12368867,proteins,XP_001350194.1,er_golgi_tr_qa,23615611,813801,MAL13P1.241,MAL13P1.241,Q8IDL8,124513676
4.28879e-05	0.000579039	0	Infinity	Pf3D7_01_v3	380697	382424	ID=PF3D7_0109800;Name=PF3D7_0109800;description=phenylalanyl-tRNA+synthetase%2C+putative;size=1728;web_id=PF3D7_0109800;locus_tag=PF3D7_0109800;size=1728;Alias=23510671,PFA0480w,adenylyl,124505829,MAL1P2.25,CAD49056.1,PF3D7_0109800,XP_001351028.1,PFA0480w,proteinBiosynth,phenylTyrmetpath
0.00213869	0.00057971	0.00173913	0.333333	Pf3D7_10_v3	284577	286302	ID=PF3D7_1007000;Name=PF3D7_1007000;description=conserved+Plasmodium+membrane+protein%2C+unknown+function;size=1726;web_id=PF3D7_1007000;locus_tag=PF3D7_1007000;size=1726;Alias=Q8IJX1,PF10_0070,PF3D7_1007000,PF10_0070,258596987,AAN35268.2,254922387,XP_001347355.2,810228,12368864
9.18081e-05	0.000581395	0.000581395	1	Pf3D7_11_v3	838380	840100	ID=PF3D7_1122000;Name=PF3D7_1122000;description=conserved+Plasmodium+protein%2C+unknown+function;size=1721;web_id=PF3D7_1122000;locus_tag=PF3D7_1122000;size=1721;Alias=23496152,Q8IIE6,PF11_0228,124804092,810775,AAN35812.1,XP_001347899.1,12368864,PF3D7_1122000,PF11_0228
0.000235799	0.00058309	0.00058309	1	Pf3D7_02_v3	384865	386580	ID=PF3D7_0209200;Name=PF3D7_0209200;description=3%27exoribonuclease%2C+putative;size=1716;web_id=PF3D7_0209200;locus_tag=PF3D7_0209200;size=1716;Alias=812684,O96177,9804551,12368864,PFB0415c,254688464,258596889,PF02_0088,AAC71872.3,rRNAstruct,PF3D7_0209200,Ribosomegenes,XP_001349602.2,PFB0415c,riboMaturation
0.000452432	0.000583431	0.000583431	1	Pf3D7_09_v3	608361	610075	ID=PF3D7_0914200;Name=PF3D7_0914200;description=phospholipid+or+glycerol+acyltransferase%2C+putative;size=1715;web_id=PF3D7_0914200;locus_tag=PF3D7_0914200;size=1715;Alias=apicoplastgene,XP_001352014.1,124506833,23505042,Q8I310,12368867,PFI0695c,PF3D7_0914200,PFI0695c,CAD51825.1,813419,11738814
6.45209e-05	0.000586166	0.00117233	0.5	Pf3D7_13_v3	1528502	1530208	ID=PF3D7_1337800;Name=PF3D7_1337800;description=calcium+dependent+protein+kinase+5+%28CDPK5%29;size=1707;web_id=PF3D7_1337800;locus_tag=PF3D7_1337800;size=1707;Alias=Q8IDV5,814178,Pviv003758CAC,20466936,actin,PF13_0211,CAD52514.1,PF3D7_1337800,PF13_0211,124513498,CDPK5,12368867,XP_001350105.1,23615522,calmodulin,cont_micro_asse,Protein_kinases,19507895
0.000107125	0.000586166	0.0017585	0.333333	Pf3D7_01_v3	222254	223960	ID=PF3D7_0105200;Name=PF3D7_0105200;description=conserved+Plasmodium+protein%2C+unknown+function;size=1707;web_id=PF3D7_0105200;locus_tag=PF3D7_0105200;size=1707;Alias=23510626,PFA0255c,124505739,MAL1P1.42,CAD49011.1,PF3D7_0105200,XP_001350983.1,PFA0255c
0.00220193	0.000587889	0	Infinity	Pf3D7_08_v3	370922	372623	ID=PF3D7_0807000;Name=PF3D7_0807000;description=gas41+homologue%2C+putative;size=1702;web_id=PF3D7_0807000;locus_tag=PF3D7_0807000;size=1702;Alias=chrom_remod,MAL8P1.131,RNApolyII,296004961,225632216,XP_002808824.1,12368867,CAX64101.1,PF3D7_0807000,C0H4S5,MAL8P1.131,hist_chap,2655220
0.000289657	0.000589623	0.00235849	0.25	Pf3D7_12_v3	187146	188842	ID=PF3D7_1203700;Name=PF3D7_1203700;description=nucleosome+assembly+protein+%28NAPL%29;size=1697;web_id=PF3D7_1203700;locus_tag=PF3D7_1203700;size=1697;Alias=MAL12P1.37,PF3D7_1203700,histone_chaperone,811090,XP_001350446.2,AAN36126.2,12368864,NucleoAssembly,Q8I608,258597456,NAPL,12368867,hist_chap,PFL0185c,16638744,2277.t00037,254945353,PFL0185c
0.000124118	0.000591366	0.000591366	1	Pf3D7_10_v3	944398	946089	ID=PF3D7_1022500;Name=PF3D7_1022500;description=citrate+synthase%2C+mitochondrial+precursor%2C+putative;size=1692;web_id=PF3D7_1022500;locus_tag=PF3D7_1022500;size=1692;Alias=PF3D7_1022500,PF10_0218,mitochondrTCAcycle,23495083,PF10_0218,AAN35415.1,12368864,12368867,nuclearGenes,810375,124802537,apoptosis,Q8I6U7,XP_001347502.1
0.00136451	0.000591716	0.00118343	0.5	Pf3D7_02_v3	492616	494306	ID=PF3D7_0212300;Name=PF3D7_0212300;description=peptide+chain+release+factor+subunit+1%2C+putative;size=1691;web_id=PF3D7_0212300;locus_tag=PF3D7_0212300;size=1691;Alias=812711,O96203,3845214,9804551,12368864,12368867,PFB0550w,124801199,PF02_0115,AAC71899.1,PF3D7_0212300,XP_001349629.1,PFB0550w,qualityControl,proteinBiosynth
0.000773811	0.000592066	0.00118413	0.5	Pf3D7_14_v3	1613853	1615542	ID=PF3D7_1439700;Name=PF3D7_1439700;description=leucine+carboxyl+methyltransferase%2C+putative;size=1690;web_id=PF3D7_1439700;locus_tag=PF3D7_1439700;size=1690;Alias=255528850,12368864,811958,AAN36989.2,PF3D7_1439700,258597793,Q8IL72,phosphorylation,wybut,PF14_0376,PF14_0376,XP_001348550.2,1396.t00406
0.00122716	0.00059312	0.00118624	0.5	Pf3D7_01_v3	417921	419607	ID=PF3D7_0110800;Name=PF3D7_0110800;description=transcription+initiation+factor+TFIIB%2C+putative;size=1687;web_id=PF3D7_0110800;locus_tag=PF3D7_0110800;size=1687;Alias=23510680,PFA0525w,124505847,MAL1P2.34,RNApolyII,CAD49065.1,PF3D7_0110800,XP_001351037.1,PFA0525w
0.000214721	0.000593472	0.00118694	0.5	Pf3D7_11_v3	428362	430047	ID=PF3D7_1110700;Name=PF3D7_1110700;description=actin-like+protein+homolog%2C+ALP1+homolog;size=1686;web_id=PF3D7_1110700;locus_tag=PF3D7_1110700;size=1686;Alias=PF11_0114,12368864,PF3D7_1110700,12368867,810663,actin,PF11_0114,Q8IIQ4,chrom_remod
0.000336357	0.000593824	0.000593824	1	Pf3D7_10_v3	932697	934381	ID=PF3D7_1022300;Name=PF3D7_1022300;description=zinc+transporter%2C+putative;size=1685;web_id=PF3D7_1022300;locus_tag=PF3D7_1022300;size=1685;Alias=254922447,PF3D7_1022300,Q8IJI1,PPM,12368864,XP_001347500.2,transporters,810373,258597087,PF10_0216,PF10_0216,AAN35413.2
4.36277e-05	0.00059453	0	Infinity	Pf3D7_10_v3	646054	647736	ID=PF3D7_1016200;Name=PF3D7_1016200;description=conserved+Plasmodium+protein%2C+unknown+function;size=1683;web_id=PF3D7_1016200;locus_tag=PF3D7_1016200;size=1683;Alias=124802340,23495023,Q8IJN4,PF3D7_1016200,810316,12368864,AAN35356.1,PF10_0158,XP_001347443.1,PF10_0158
0.000788921	0.000595593	0.00119119	0.5	Pf3D7_14_v3	2255062	2256741	ID=PF3D7_1455200.1;Name=PF3D7_1455200.1;description=conserved+Plasmodium+protein%2C+unknown+function;size=1680;web_id=PF3D7_1455200.1;locus_tag=PF3D7_1455200.1;size=1680;Alias=Q8IKS6,PF3D7_1455200.1,PF14_0526,812108,12368864,PF14_0526
0.000788921	0.000595593	0.00119119	0.5	Pf3D7_14_v3	2255062	2256741	ID=PF3D7_1455200.2;Name=PF3D7_1455200.2;description=conserved+Plasmodium+protein%2C+unknown+function;size=1680;web_id=PF3D7_1455200.2;locus_tag=PF3D7_1455200.2;size=1680;Alias=AAN37139.2,255528892,258597866,PF3D7_1455200.2,XP_001348700.2
0.0002591	0.000596659	0.00178998	0.333333	Pf3D7_04_v3	406233	407909	ID=PF3D7_0408400;Name=PF3D7_0408400;description=conserved+Plasmodium+protein%2C+unknown+function;size=1677;web_id=PF3D7_0408400;locus_tag=PF3D7_0408400;size=1677;Alias=812355,C0H499,12368867,PFD0415c,225631630,296004408,CAX63917.1,MAL4P2.19b,PF3D7_0408400,XP_002808647.1,PFD0415c
0.000780924	0.000599341	0.00149835	0.4	Pf3D7_09_v3	908724	912061	ID=PF3D7_0922400;Name=PF3D7_0922400;description=para-aminobenzoic+acid+synthetase+%28pBAS%29;size=3338;web_id=PF3D7_0922400;locus_tag=PF3D7_0922400;size=3338;Alias=124506996,vitaminB6metpath,PF3D7_0922400,shikimatebiopath,23505124,12368867,Q8I2T0,CAD51906.1,proteases,813500,PFI1100w,pBAS,XP_001352095.1,PFI1100w,folatebiopath
0.000907573	0.00059952	0.00119904	0.5	Pf3D7_11_v3	983951	985619	ID=PF3D7_1125000;Name=PF3D7_1125000;description=conserved+Plasmodium+protein%2C+unknown+function;size=1669;web_id=PF3D7_1125000;locus_tag=PF3D7_1125000;size=1669;Alias=810808,PF11_0261,254832657,12368864,XP_001347932.2,PF11_0261,11738814,PF3D7_1125000,AAN35845.2,Q8IIB3,258597312
0.000374382	0.00059988	0.00239952	0.25	Pf3D7_10_v3	1195677	1197344	ID=PF3D7_1029200;Name=PF3D7_1029200;description=conserved+Plasmodium+protein%2C+unknown+function;size=1668;web_id=PF3D7_1029200;locus_tag=PF3D7_1029200;size=1668;Alias=PF10_0285,XP_001347569.1,124802705,810442,23495151,Q8IJB3,PF3D7_1029200,PF10_0285,12368864,AAN35482.1
0.000154071	0.00059988	0.00359928	0.166667	Pf3D7_10_v3	482527	484194	ID=PF3D7_1012600;Name=PF3D7_1012600;description=GMP+synthetase+%28GMPS%29;size=1668;web_id=PF3D7_1012600;locus_tag=PF3D7_1012600;size=1668;Alias=AAN35321.1,GMPS,12368864,PF10_0123,Q8IJR9,124802227,12368867,17868038,810281,XP_001347408.1,purinemetpath,23494987,PF10_0123,655513,PF3D7_1012600
0.00102956	0.00059988	0.0059988	0.1	Pf3D7_11_v3	179461	181128	ID=PF3D7_1104100;Name=PF3D7_1104100;description=syntaxin%2C+Qa-SNARE+family+%28SYN13%29;size=1668;web_id=PF3D7_1104100;locus_tag=PF3D7_1104100;size=1668;Alias=Q8IIW1,PF11_0052,254832588,vesExocytosis,AAN35641.2,810566,ABO61884.1,PF11_0052,PF3D7_1104100,258597191,SYN13,134143227,XP_001347728.2
0.000192646	0.000602773	0	Infinity	Pf3D7_02_v3	477432	479091	ID=PF3D7_0211900;Name=PF3D7_0211900;description=conserved+Plasmodium+protein%2C+unknown+function;size=1660;web_id=PF3D7_0211900;locus_tag=PF3D7_0211900;size=1660;Alias=812707,O96199,9804551,12368864,PFB0530c,254688471,258596900,PF02_0111,AAC71895.3,PF3D7_0211900,XP_001349625.2,PFB0530c
0.00113299	0.000603136	0	Infinity	Pf3D7_10_v3	460335	461993	ID=PF3D7_1011900;Name=PF3D7_1011900;description=heme+oxygenase;size=1659;web_id=PF3D7_1011900;locus_tag=PF3D7_1011900;size=1659;Alias=12368864,porphyrinmetpath,Q8IJS6,AAN35314.2,11738814,258597023,19073183,PF3D7_1011900,XP_001347401.2,810274,PF10_0116,PF10_0116,254922407
6.65092e-05	0.00060423	0.00120846	0.5	Pf3D7_02_v3	707738	709393	ID=PF3D7_0217100;Name=PF3D7_0217100;description=ATP+synthase+F1%2C+alpha+subunit;size=1656;web_id=PF3D7_0217100;locus_tag=PF3D7_0217100;size=1656;Alias=812757,O96252,3845279,9804551,12368864,12368867,PFB0795w,124801366,PF02_0161,AAC71948.1,nuclearGenes,PF3D7_0217100,mitochonApico,XP_001349675.1,PFB0795w
0.00104585	0.000604961	0.000907441	0.666667	Pf3D7_14_v3	1656434	1659740	ID=PF3D7_1440600;Name=PF3D7_1440600;description=conserved+Plasmodium+protein%2C+unknown+function;size=3307;web_id=PF3D7_1440600;locus_tag=PF3D7_1440600;size=3307;Alias=811967,Q8IL64,PF14_0385,PF14_0385,12368864,PF3D7_1440600
8.98876e-05	0.000606796	0.00121359	0.5	Pf3D7_13_v3	2739350	2740998	ID=PF3D7_1368900;Name=PF3D7_1368900;description=conserved+Plasmodium+protein%2C+unknown+function;size=1649;web_id=PF3D7_1368900;locus_tag=PF3D7_1368900;size=1649;Alias=813915,CAD52808.1,MAL13P1.347,PF3D7_1368900,XP_001350399.1,23615816,124514086,MAL13P1.347,Q8ID21
0.000940308	0.000607042	0.00121408	0.5	Pf3D7_12_v3	1228063	1233005	ID=PF3D7_1229900.1;Name=PF3D7_1229900.1;description=conserved+Plasmodium+protein%2C+unknown+function;size=4943;web_id=PF3D7_1229900.1;locus_tag=PF3D7_1229900.1;size=4943;Alias=PFL1440c,PFL1440c,Q8I5C1,2277.t00288,811340,12368864,MAL12P1.288,PF3D7_1229900.1
0.000940308	0.000607042	0.00121408	0.5	Pf3D7_12_v3	1228063	1233005	ID=PF3D7_1229900.2;Name=PF3D7_1229900.2;description=conserved+Plasmodium+protein%2C+unknown+function;size=4943;web_id=PF3D7_1229900.2;locus_tag=PF3D7_1229900.2;size=4943;Alias=PF3D7_1229900.2
0.000496406	0.000607533	0.00121507	0.5	Pf3D7_14_v3	1332363	1337301	ID=PF3D7_1433500;Name=PF3D7_1433500;description=DNA+topoisomerase+II%2C+putative;size=4939;web_id=PF3D7_1433500;locus_tag=PF3D7_1433500;size=4939;Alias=PF14_0316,dnareplication,DNAgenes,124809097,protProphase,23497385,811898,12368864,PF3D7_1433500,XP_001348490.1,AAN36929.1,PF14_0316,Q8ILC8
0.000739501	0.000607903	0	Infinity	Pf3D7_10_v3	281459	283104	ID=PF3D7_1006900;Name=PF3D7_1006900;description=PPPDE+peptidase%2C+putative;size=1646;web_id=PF3D7_1006900;locus_tag=PF3D7_1006900;size=1646;Alias=810227,PF3D7_1006900,Q8IJX2,AAN35267.2,254922386,XP_001347354.2,258596985,PF10_0069,12368864,PF10_0069
0.000121	0.000609013	0.00152253	0.4	Pf3D7_10_v3	685578	688862	ID=PF3D7_1017000;Name=PF3D7_1017000;description=DNA+polymerase+delta+catalytic+subunit;size=3285;web_id=PF3D7_1017000;locus_tag=PF3D7_1017000;size=3285;Alias=excisionrepair,XP_001347450.1,643632,DNAgenes,Q7KQL4,23495030,DNArepair,160270,12368864,DNA_transles,PF10_0165,9941,PF10_0165,P30315.1,810323,12368867,AAN35363.1,dnareplication,PF3D7_1017000,CAA44289.1,baseExcision,PCNA_UB,AAA29589.1,1248023…
4.4827e-05	0.000610874	0.000610874	1	Pf3D7_14_v3	1142154	1143791	ID=PF3D7_1429100;Name=PF3D7_1429100;description=apicoplast+ribosomal+protein+L15+precursor%2C+putative;size=1638;web_id=PF3D7_1429100;locus_tag=PF3D7_1429100;size=1638;Alias=12368867,PF14_0270,apicoplastgene,PF3D7_1429100,12368864,23497338,Q8ILH3,XP_001348444.1,ribosomeStruct,124808927,AAN36883.1,prokaryotes,811852,PF14_0270,11738814
0.000284593	0.000616143	0.000616143	1	Pf3D7_11_v3	1367186	1368809	ID=PF3D7_1134800;Name=PF3D7_1134800;description=coatomer+delta+subunit%2C+putative;size=1624;web_id=PF3D7_1134800;locus_tag=PF3D7_1134800;size=1624;Alias=AAN35943.1,124804529,810906,PF3D7_1134800,AAM46844.1,XP_001348030.1,23496285,sub_loc_adapt,PF11_0359,COPI,PF11_0359,Q8II16,12368867,12368864,21311767
0.00196897	0.000618429	0.000618429	1	Pf3D7_11_v3	716795	718412	ID=PF3D7_1118900;Name=PF3D7_1118900;description=conserved+Plasmodium+protein%2C+unknown+function;size=1618;web_id=PF3D7_1118900;locus_tag=PF3D7_1118900;size=1618;Alias=XP_001347867.1,PF3D7_1118900,124803983,AAN35780.1,Q8IIH8,PF11_0196,23496119,PF11_0196,810743,12368864
0.00034132	0.000619579	0.00185874	0.333333	Pf3D7_07_v3	972658	974272	ID=PF3D7_0723200;Name=PF3D7_0723200;description=conserved+Plasmodium+protein%2C+unknown+function;size=1615;web_id=PF3D7_0723200;locus_tag=PF3D7_0723200;size=1615;Alias=Q8IBM1,MAL7P1.124,23498901,CAD50979.1,MAL7P1.124,2655147,PF3D7_0723200,124512000,XP_001349133.1
0.000555598	0.000620347	0.000620347	1	Pf3D7_12_v3	820586	822198	ID=PF3D7_1220600;Name=PF3D7_1220600;description=conserved+Plasmodium+protein%2C+unknown+function;size=1613;web_id=PF3D7_1220600;locus_tag=PF3D7_1220600;size=1613;Alias=124806018,AAN36284.1,811250,MAL12P1.198,PFL0990w,PF3D7_1220600,Q8I5K7,PFL0990w,23496729,2277.t00198,11738814,XP_001350604.1,12368864
0.00134071	0.000622278	0.000622278	1	Pf3D7_04_v3	843562	845169	ID=PF3D7_0418800;Name=PF3D7_0418800;description=conserved+Plasmodium+protein%2C+unknown+function;size=1608;web_id=PF3D7_0418800;locus_tag=PF3D7_0418800;size=1608;Alias=812501,C0H4B4,12368867,PFD0910w,225631646,296004440,CAX63932.1,MAL4P1.177,PF3D7_0418800,XP_002808662.1,PFD0910w
9.13277e-05	0.000622278	0.00186683	0.333333	Pf3D7_12_v3	1487084	1488691	ID=PF3D7_1235700;Name=PF3D7_1235700;description=ATP+synthase+subunit+beta%2C+mitochondrial;size=1608;web_id=PF3D7_1235700;locus_tag=PF3D7_1235700;size=1608;Alias=Q8I0V2,nuclearGenes,PFL1725w,AAN36431.1,12368864,PF3D7_1235700,23496878,PFL1725w,MAL12P1.343,124806537,2277.t00345,811397,mitochonApico,XP_001350751.1,12368867
0.000164618	0.000622665	0.00155666	0.4	Pf3D7_08_v3	762118	765330	ID=PF3D7_0816600;Name=PF3D7_0816600;description=ClpB+protein%2C+putative+%28ClpB1%29;size=3213;web_id=PF3D7_0816600;locus_tag=PF3D7_0816600;size=3213;Alias=11738814,2655262,chapfold,PF08_0063,Pf_chaperones,apicoplastgene,ClpB1,Q8IB03,23499127,chaperone,124512450,XP_001349358.1,CAD51207.1,PF08_0063,PF3D7_0816600
4.49701e-05	0.00062461	0	Infinity	Pf3D7_09_v3	639658	641259	ID=PF3D7_0915000;Name=PF3D7_0915000;description=type+II+NADH%3Aubiquinone+oxidoreductase+%28NDH2%29;size=1602;web_id=PF3D7_0915000;locus_tag=PF3D7_0915000;size=1602;Alias=nuclearGenes,813427,PFI0735c,12368867,CAD51833.1,NDH2,PFI0735c,124506849,23505050,mitochondrionef,PF3D7_0915000,Q8I302,XP_001352022.1
0.000115016	0.00062461	0.00249844	0.25	Pf3D7_03_v3	207342	208943	ID=PF3D7_0304200;Name=PF3D7_0304200;description=EH+%28Eps15+homology%29+protein+%28PAST1%29;size=1602;web_id=PF3D7_0304200;locus_tag=PF3D7_0304200;size=1602;Alias=PAST1,814359,Q9NLB8,15375368,MAL3P2.7,PFC0190c,124504749,CAB38994.2,PF3D7_0304200,Pkno007842AAA,XP_001351117.1,PFC0190c,clathrintransport
4.5921e-05	0.000625782	0.000625782	1	Pf3D7_03_v3	372632	374230	ID=PF3D7_0308600;Name=PF3D7_0308600;description=pre-mRNA-processing+factor+19%2C+putative+%28PRPF19%29;size=1599;web_id=PF3D7_0308600;locus_tag=PF3D7_0308600;size=1599;Alias=814402,O77325,PRPF19,3649760,10448855,12368867,MAL3P3.8,PFC0365w,splicing,124504835,CAB11109.1,PF3D7_0308600,XP_001351160.1,PFC0365w
0.00140477	0.000626174	0.000626174	1	Pf3D7_05_v3	376855	378452	ID=PF3D7_0509000;Name=PF3D7_0509000;description=SNAP+protein+%28soluble+N-ethylmaleimide-sensitive+factor+Attachment+Protein%29%2C+putative;size=1598;web_id=PF3D7_0509000;locus_tag=PF3D7_0509000;size=1598;Alias=MAL5P1.91,PFE0445c,vesExocytosis,PFE0445c,12368867,124506101,Q8I0X0,812853,CAD51455.1,XP_001351648.1,23504576,PF3D7_0509000
0.00117774	0.000626763	0.000313381	2	Pf3D7_10_v3	840212	843403	ID=PF3D7_1020800;Name=PF3D7_1020800;description=dihydrolipoamide+acyltransferase+component+E2+%28DLAT%29;size=3192;web_id=PF3D7_1020800;locus_tag=PF3D7_1020800;size=3192;Alias=810359,12368867,Q8IJJ4,XP_001347486.2,apicoplastgene,DLAT,44970689,11738814,AAS49638.1,PF10_0407,258597072,12368864,PF3D7_1020800,AAN35399.2,pyruvatemetpath,254922438,lipoicAcid,PF10_0407
0.000674091	0.000628141	0.00125628	0.5	Pf3D7_13_v3	2539948	2541540	ID=PF3D7_1363200;Name=PF3D7_1363200;description=bifunctional+polynucleotide+phosphatase%2Fkinase+%28PNKP%29;size=1593;web_id=PF3D7_1363200;locus_tag=PF3D7_1363200;size=1593;Alias=CAD52753.1,ExcisionRepairTab,PF13_0334,XP_001350344.1,124513976,PF13_0334,Q8ID74,814293,12368867,23615761,PNKP,PF3D7_1363200
0.000422858	0.000629723	0.00251889	0.25	Pf3D7_11_v3	196767	198355	ID=PF3D7_1104400;Name=PF3D7_1104400;description=conserved+protein%2C+unknown+function;size=1589;web_id=PF3D7_1104400;locus_tag=PF3D7_1104400;size=1589;Alias=PF11_0055,XP_001347731.1,AAN35644.1,PF3D7_1104400,protER,124803477,11738814,12368864,810607,MCprot,23495981,Q8IIV8,PF11_0055,apicoplastgene
0.00133762	0.000630517	0.000945776	0.666667	Pf3D7_13_v3	1243172	1246344	ID=PF3D7_1329400;Name=PF3D7_1329400;description=AMP+deaminase%2C+putative;size=3173;web_id=PF3D7_1329400;locus_tag=PF3D7_1329400;size=3173;Alias=MAL13P1.146,PF3D7_1329400,12368867,MAL13P1.146,Q8IE53,813697,purinemetpath
0.000451989	0.000631313	0	Infinity	Pf3D7_09_v3	748678	750262	ID=PF3D7_0918200;Name=PF3D7_0918200;description=organelle+ribosomal+protein+L3+precursor%2C+putative;size=1585;web_id=PF3D7_0918200;locus_tag=PF3D7_0918200;size=1585;Alias=296005215,PFI0890c,prokaryotes,PFI0890c,C0H543,ribosomeStruct,12368867,XP_002808939.1,225631825,PF3D7_0918200,CAX64220.1,nuclearGenes,813458
0.000841297	0.000632511	0.00126502	0.5	Pf3D7_13_v3	2629861	2631442	ID=PF3D7_1365800;Name=PF3D7_1365800;description=conserved+Plasmodium+protein%2C+unknown+function;size=1582;web_id=PF3D7_1365800;locus_tag=PF3D7_1365800;size=1582;Alias=XP_001350368.1,PF3D7_1365800,CAD52777.1,813897,Q8ID51,MAL13P1.330,MAL13P1.330,23615785,124514024
0.000212484	0.000632711	0.000632711	1	Pf3D7_08_v3	363260	366421	ID=PF3D7_0806800;Name=PF3D7_0806800;description=vacuolar+proton+translocating+ATPase+subunit+A%2C+putative;size=3162;web_id=PF3D7_0806800;locus_tag=PF3D7_0806800;size=3162;Alias=PPM,XP_001349454.1,transporters,PF08_0113,PF3D7_0806800,CAD51303.1,Q8IAQ8,23499223,124512642,ERGolgiVacuole,4794196,12368867,PF08_0113
6.99318e-05	0.000635324	0.00127065	0.5	Pf3D7_05_v3	1229077	1230651	ID=PF3D7_0530200;Name=PF3D7_0530200;description=triose+phosphate+transporter+%28iTPT%29;size=1575;web_id=PF3D7_0530200;locus_tag=PF3D7_0530200;size=1575;Alias=iTPT,124506517,PFE1510c,apicoplastgene,PF3D7_0530200,Q8I0U9,isoprenoidmetpath,PFE1510c,CAD51663.1,23504882,XP_001351856.1,mitochonApico,MAL5P1.299,transporters,813115
0.000404366	0.000635324	0.00127065	0.5	Pf3D7_13_v3	1398271	1399845	ID=PF3D7_1334200;Name=PF3D7_1334200;description=chaperone+binding+protein%2C+putative;size=1575;web_id=PF3D7_1334200;locus_tag=PF3D7_1334200;size=1575;Alias=PF3D7_1334200,CAD52481.1,eukaryotes,XP_001350073.1,PF13_0190,124513434,814160,23615490,PF13_0190,Pf_chaperones,Q8IDY6
0.000967908	0.000635324	0.00190597	0.333333	Pf3D7_14_v3	2755225	2756799	ID=PF3D7_1467500;Name=PF3D7_1467500;description=conserved+Plasmodium+protein%2C+unknown+function;size=1575;web_id=PF3D7_1467500;locus_tag=PF3D7_1467500;size=1575;Alias=124810266,AAN37256.1,12368864,23497717,Q8IKG2,PF3D7_1467500,XP_001348817.1,PF14_0643,PF14_0643,812225
0.0017899	0.000636537	0.000636537	1	Pf3D7_03_v3	669302	670873	ID=PF3D7_0316600;Name=PF3D7_0316600;description=formate-nitrite+transporter%2C+putative;size=1572;web_id=PF3D7_0316600;locus_tag=PF3D7_0316600;size=1572;Alias=814480,O77389,7768287,10448855,12368867,MAL3P6.6,PFC0725c,124504989,CAB11145.2,transporters,PF3D7_0316600,XP_001351236.1,PFC0725c,nitrogenmetpath
0.000568149	0.000638978	0.00191693	0.333333	Pf3D7_06_v3	118638	120203	ID=PF3D7_0602900;Name=PF3D7_0602900;description=conserved+Plasmodium+protein%2C+unknown+function;size=1566;web_id=PF3D7_0602900;locus_tag=PF3D7_0602900;size=1566;Alias=C6KSM9,86170454,PF3D7_0602900,2270.t00286,XP_966019.1,PFF0140c,CAG25199.1,PFF0140c,3885962,MAL6P1.32,12368867,46362261
0.000313814	0.000640615	0.000640615	1	Pf3D7_12_v3	1033551	1035112	ID=PF3D7_1225500;Name=PF3D7_1225500;description=small+subunit+rRNA+processing+factor%2C+putative;size=1562;web_id=PF3D7_1225500;locus_tag=PF3D7_1225500;size=1562;Alias=AAN36332.1,XP_001350652.1,12368864,Ribosomegenes,PF3D7_1225500,2277.t00246,PFL1230w,23496778,811298,124806187,Q8I5G2,PFL1230w,MAL12P1.246
0.00033518	0.000641437	0.00192431	0.333333	Pf3D7_10_v3	715878	717437	ID=PF3D7_1017900;Name=PF3D7_1017900;description=26s+proteasome+regulatory+subunit+p55%2C+putative;size=1560;web_id=PF3D7_1017900;locus_tag=PF3D7_1017900;size=1560;Alias=XP_001347459.1,proteaUbiqpath,810332,AAN35372.1,12368867,proteasome_new,PF10_0174,PF3D7_1017900,12368864,PF10_0174,Q8IJM0,124802396,23495039
0.000141607	0.000641437	0.00256575	0.25	Pf3D7_14_v3	3117392	3118951	ID=PF3D7_1475700;Name=PF3D7_1475700;description=tubulin%2C+putative;size=1560;web_id=PF3D7_1475700;locus_tag=PF3D7_1475700;size=1560;Alias=12368864,PF3D7_1475700,812307,tubulin,microtubuleDynam,XP_001348899.1,Kinetochore,124810505,23497801,PF14_0725,PF14_0725,AAN37338.1,Q8IK81,mitoticCentro,Centriole
0.00106552	0.000642674	0.00192802	0.333333	Pf3D7_09_v3	305070	306626	ID=PF3D7_0906100;Name=PF3D7_0906100;description=developmental+protein%2C+putative;size=1557;web_id=PF3D7_0906100;locus_tag=PF3D7_0906100;size=1557;Alias=PFI0300w,Pfal008670AAA,largeTethering,124506675,813340,CAD51746.1,PF3D7_0906100,XP_001351935.1,23504962,PFI0300w,Q8I388,12368867
0.00064121	0.000645578	0.00387347	0.166667	Pf3D7_12_v3	1746444	1747993	ID=PF3D7_1241100;Name=PF3D7_1241100;description=conserved+Plasmodium+protein%2C+unknown+function;size=1550;web_id=PF3D7_1241100;locus_tag=PF3D7_1241100;size=1550;Alias=2277.t00395,XP_001350799.1,PF3D7_1241100,124806693,12368864,AAN36479.1,PFL1975c,PFL1975c,MAL12P1.393,811447,Q8I518,23496927
0.00145405	0.000646412	0.000646412	1	Pf3D7_13_v3	2406838	2408385	ID=PF3D7_1360200;Name=PF3D7_1360200;description=conserved+protein%2C+unknown+function;size=1548;web_id=PF3D7_1360200;locus_tag=PF3D7_1360200;size=1548;Alias=XP_001350313.1,MAL13P1.299,Q8IDA3,124513914,MAL13P1.299,CAD52722.1,23615730,813862,PF3D7_1360200
0.000790051	0.000650618	0.00130124	0.5	Pf3D7_08_v3	613325	614862	ID=PF3D7_0812220;Name=PF3D7_0812220;description=GTPase%2C+putative;size=1538;web_id=PF3D7_0812220;locus_tag=PF3D7_0812220;size=1538;Alias=MAL8P1.99,MAL8P1.98,PF3D7_0812220
7.10844e-05	0.000654022	0.000654022	1	Pf3D7_13_v3	2195449	2196978	ID=PF3D7_1355300;Name=PF3D7_1355300;description=histone-lysine+N-methyltransferase%2C+putative+%28SET6%29;size=1530;web_id=PF3D7_1355300;locus_tag=PF3D7_1355300;size=1530;Alias=SET6,814257,chrom_lands,Q8IDE8,chrom_mod_prot,PF13_0293,124513818,PF3D7_1355300,PF13_0293,XP_001350265.1,CAD52674.1,23615682,histoneMethylation
0.000274381	0.000658328	0.00131666	0.5	Pf3D7_13_v3	2295637	2297156	ID=PF3D7_1357900;Name=PF3D7_1357900;description=pyrroline+carboxylate+reductase;size=1520;web_id=PF3D7_1357900;locus_tag=PF3D7_1357900;size=1520;Alias=813846,XP_001350290.1,CAD52699.1,Q8IDC6,23615707,arginineproline,MAL13P1.284,MAL13P1.284,PF3D7_1357900,124513868
0.00084698	0.000658762	0.00197628	0.333333	Pf3D7_14_v3	365509	367027	ID=PF3D7_1409400;Name=PF3D7_1409400;description=conserved+Plasmodium+membrane+protein%2C+unknown+function;size=1519;web_id=PF3D7_1409400;locus_tag=PF3D7_1409400;size=1519;Alias=255528768,12368864,258597650,PF14_0092,811673,PF14_0091,Q8IM01,XP_001348265.2,AAN36704.2,PF3D7_1409400,PF14_0092
7.16467e-05	0.000659196	0.000659196	1	Pf3D7_13_v3	1287891	1289408	ID=PF3D7_1330600;Name=PF3D7_1330600;description=elongation+factor+Tu%2C+putative;size=1518;web_id=PF3D7_1330600;locus_tag=PF3D7_1330600;size=1518;Alias=21163263,prokaryotes,MAL13P1.164,XP_001350039.1,CAD52447.1,23615456,813717,PF3D7_1330600,MAL13P1.164,124513366,nuclearGenes,Q8IE20
0.000144206	0.000659196	0.00263678	0.25	Pf3D7_11_v3	1582995	1584512	ID=PF3D7_1139700;Name=PF3D7_1139700;description=adrenodoxin+reductase%2C+putative;size=1518;web_id=PF3D7_1139700;locus_tag=PF3D7_1139700;size=1518;Alias=XP_001348077.1,12368864,PF11_0407,Q8IHW9,PF3D7_1139700,nuclearGenes,23496333,FeSProtein,PF11_0407,BiogenesisCytochromeOxidase,AAN35990.1,124804682,12368867,810953
0.000419079	0.000660066	0	Infinity	Pf3D7_13_v3	1087584	1089099	ID=PF3D7_1326100;Name=PF3D7_1326100;description=conserved+Plasmodium+protein%2C+unknown+function;size=1516;web_id=PF3D7_1326100;locus_tag=PF3D7_1326100;size=1516;Alias=813693,CAD52407.1,PF3D7_1326100,Q8IE59,XP_001349999.1,MAL13P1.142,MAL13P1.142,124513286,23615416
0.00204329	0.000660939	0	Infinity	Pf3D7_02_v3	356501	358014	ID=PF3D7_0208700.1;Name=PF3D7_0208700.1;description=conserved+Plasmodium+protein%2C+unknown+function;size=1514;web_id=PF3D7_0208700.1;locus_tag=PF3D7_0208700.1;size=1514;Alias=PFB0391c,254688463,258537822,ACT79306.1,XP_002585390.1,PF3D7_0208700.1
0.00204329	0.000660939	0	Infinity	Pf3D7_02_v3	356501	358014	ID=PF3D7_0208700.2;Name=PF3D7_0208700.2;description=conserved+Plasmodium+protein%2C+unknown+function;size=1514;web_id=PF3D7_0208700.2;locus_tag=PF3D7_0208700.2;size=1514;Alias=812679,C6S3B3,Q8I662,9804551,12368864,23503380,PFB0391c,124801052,AAN37610.1,XP_001349597.1,PF3D7_0208700.2
0.00034984	0.000661594	0.000992392	0.666667	Pf3D7_03_v3	638283	641306	ID=PF3D7_0315700;Name=PF3D7_0315700;description=conserved+Plasmodium+membrane+protein%2C+unknown+function;size=3024;web_id=PF3D7_0315700;locus_tag=PF3D7_0315700;size=3024;Alias=814471,O97272,10448855,12368867,23477019,PFC0685w,124504971,MAL3P5.21,CAB38983.2,PF3D7_0315700,XP_001351227.1,PFC0685w
0.00216585	0.000661813	0.00132363	0.5	Pf3D7_07_v3	381592	384614	ID=PF3D7_0708400;Name=PF3D7_0708400;description=heat+shock+protein+90+%28HSP90%29;size=3023;web_id=PF3D7_0708400;locus_tag=PF3D7_0708400;size=3023;Alias=Pf_chaperones,23498766,chapfold,AAC47837.1,2655065,redoxReg,124511730,2642495,centrosome,eukaryotes,telomerase,505338,MCprot,PF07_0029,AAA66178.1,protPV,Q8IC05,PF3D7_0708400,HSP90,XP_001348998.1,3k60,CAD50836.1,PF07_0029
0.000632291	0.000662691	0.00132538	0.5	Pf3D7_08_v3	909207	910716	ID=PF3D7_0820100;Name=PF3D7_0820100;description=conserved+Plasmodium+protein%2C+unknown+function;size=1510;web_id=PF3D7_0820100;locus_tag=PF3D7_0820100;size=1510;Alias=11738814,XP_002808864.1,2655341,PF3D7_0820100,MAL8P1.59,225632261,C0H4W4,CAX64142.1,MAL8P1.59,296005054
4.86617e-05	0.00066313	0.00066313	1	Pf3D7_08_v3	1037100	1038608	ID=PF3D7_0823500;Name=PF3D7_0823500;description=membrane+skeletal+protein+IMC1-related;size=1509;web_id=PF3D7_0823500;locus_tag=PF3D7_0823500;size=1509;Alias=Q8IB69,23499058,CAD51138.1,PF3D7_0823500,PF08_0033,2655484,PF08_0033,124512312,linearMotor,XP_001349289.1
0.000571418	0.00066313	0.00132626	0.5	Pf3D7_14_v3	507360	508868	ID=PF3D7_1412500;Name=PF3D7_1412500;description=actin+II+%28ACT2%29;size=1509;web_id=PF3D7_1412500;locus_tag=PF3D7_1412500;size=1509;Alias=AAN36736.1,PF14_0124,XP_001348297.1,ACT2,2459617,23497189,811705,Q8ILW9,Q8ILW9.1,linearMotor,P86288.1,chrom_remod,PF14_0124,124808377,actin,12368864,74930170,239977064,PF3D7_1412500
0.000291441	0.000664452	0.00465116	0.142857	Pf3D7_10_v3	1200894	1202399	ID=PF3D7_1029400;Name=PF3D7_1029400;description=conserved+Plasmodium+protein%2C+unknown+function;size=1506;web_id=PF3D7_1029400;locus_tag=PF3D7_1029400;size=1506;Alias=PF10_0287,PF10_0287,810444,12368864,PF3D7_1029400,Q8IJB1,AAN35484.1,23495153,XP_001347571.1,124802712
0.000266324	0.000664452	0.00531561	0.125	Pf3D7_13_v3	2055216	2056721	ID=PF3D7_1351600;Name=PF3D7_1351600;description=glycerol+kinase+%28GK%29;size=1506;web_id=PF3D7_1351600;locus_tag=PF3D7_1351600;size=1506;Alias=CAD52637.1,Q8IDI4,GK,124513744,PF3D7_1351600,PF13_0269,XP_001350228.1,glycolysispath,PF13_0269,814234,23615645
0.000765462	0.000666667	0.000666667	1	Pf3D7_11_v3	235597	237097	ID=PF3D7_1105400;Name=PF3D7_1105400;description=40S+ribosomal+protein+S4%2C+putative;size=1501;web_id=PF3D7_1105400;locus_tag=PF3D7_1105400;size=1501;Alias=PF3D7_1105400,254832593,PF11_0065,258597201,apicoplastgene,PF11_0065,12368864,Q8IIU8,12368867,810617,ribosomeStruct,AAN35654.2,XP_001347741.2
0.00125061	0.000666667	0.00166667	0.4	Pf3D7_14_v3	2954108	2957108	ID=PF3D7_1472300;Name=PF3D7_1472300;description=conserved+Plasmodium+membrane+protein%2C+unknown+function;size=3001;web_id=PF3D7_1472300;locus_tag=PF3D7_1472300;size=3001;Alias=12368864,XP_001348865.2,11738814,AAN37304.2,PF14_0691,255528940,PF3D7_1472300,258597947,Q8IKB5,812273,PF14_0691
0.00243038	0.000667111	0	Infinity	Pf3D7_08_v3	384298	385797	ID=PF3D7_0807400;Name=PF3D7_0807400;description=conserved+Plasmodium+protein%2C+unknown+function;size=1500;web_id=PF3D7_0807400;locus_tag=PF3D7_0807400;size=1500;Alias=XP_002808826.1,225632218,C0H4S7,MAL8P1.300,9221959,296004965,CAX64103.1,PF3D7_0807400,MAL8P1.300
0.000105571	0.000667111	0.00133422	0.5	Pf3D7_11_v3	156614	158113	ID=PF3D7_1103600;Name=PF3D7_1103600;description=actin-like+protein%2C+putative;size=1500;web_id=PF3D7_1103600;locus_tag=PF3D7_1103600;size=1500;Alias=23495973,AAN35636.1,810600,actin,NucleoAssembly,PF11_0047,12368864,PF3D7_1103600,XP_001347723.1,124803460,Q8IIW6,PF11_0047
0.000472148	0.000670691	0.000670691	1	Pf3D7_07_v3	287597	289088	ID=PF3D7_0705800;Name=PF3D7_0705800;description=cysteine-rich+secretory+protein%2C+putative;size=1492;web_id=PF3D7_0705800;locus_tag=PF3D7_0705800;size=1492;Alias=9221892,MAL7P1.339,PF3D7_0705800,MAL7P1.339,C0H4K9
0.000456857	0.000671141	0.00134228	0.5	Pf3D7_14_v3	509686	511176	ID=PF3D7_1412600;Name=PF3D7_1412600;description=deoxyhypusine+synthase;size=1491;web_id=PF3D7_1412600;locus_tag=PF3D7_1412600;size=1491;Alias=Q8ILW8,12368864,eiF5A,PF3D7_1412600,811706,23497190,PF14_0125,AAN36737.1,124808382,XP_001348298.1,PF14_0125
2.51355e-05	0.000672495	0	Infinity	Pf3D7_13_v3	479353	480840	ID=PF3D7_1311100;Name=PF3D7_1311100;description=conserved+Plasmodium+protein%2C+unknown+function;size=1488;web_id=PF3D7_1311100;locus_tag=PF3D7_1311100;size=1488;Alias=PF13_0060,PF3D7_1311100,PF13_0060,XP_001349839.1,124512966,CAD52246.1,Q8IEK6,814038,23615256
0.00285626	0.000673401	0.0013468	0.5	Pf3D7_13_v3	1279800	1281285	ID=PF3D7_1330400.1;Name=PF3D7_1330400.1;description=ER+lumen+protein+retaining+receptor+1%2C+putative;size=1486;web_id=PF3D7_1330400.1;locus_tag=PF3D7_1330400.1;size=1486;Alias=124513362,MAL13P1.163,Q8IE22,813716,23615454,XP_001350037.1,12368867,MAL13P1.163,er_golgi_tr_qa,PF3D7_1330400.1,CAD52445.1
0.00285626	0.000673401	0.0013468	0.5	Pf3D7_13_v3	1279800	1281285	ID=PF3D7_1330400.2;Name=PF3D7_1330400.2;description=ER+lumen+protein+retaining+receptor+1%2C+putative;size=1486;web_id=PF3D7_1330400.2;locus_tag=PF3D7_1330400.2;size=1486;Alias=PF3D7_1330400.2
0.000861977	0.000673854	0.000673854	1	Pf3D7_11_v3	539903	541387	ID=PF3D7_1114100.1;Name=PF3D7_1114100.1;description=rhomboid+protease+ROM1+%28ROM1%29;size=1485;web_id=PF3D7_1114100.1;locus_tag=PF3D7_1114100.1;size=1485;Alias=258597247,158120946,PF11_0149,254832622,Q8IIM2,ROM1,proteases,AAN35733.2,810696,PF3D7_1114100.1,PF11_0149,ABW16954.1,XP_001347820.2
0.000861977	0.000673854	0.000673854	1	Pf3D7_11_v3	539903	541387	ID=PF3D7_1114100.2;Name=PF3D7_1114100.2;description=rhomboid+protease+ROM1;size=1485;web_id=PF3D7_1114100.2;locus_tag=PF3D7_1114100.2;size=1485;Alias=PF3D7_1114100.2
0.000235439	0.000673854	0.00202156	0.333333	Pf3D7_12_v3	1962774	1964258	ID=PF3D7_1247600;Name=PF3D7_1247600;description=conserved+Plasmodium+protein%2C+unknown+function;size=1485;web_id=PF3D7_1247600;locus_tag=PF3D7_1247600;size=1485;Alias=2277.t00457,MAL12P1.456,PF3D7_1247600
0.000136286	0.000675219	0	Infinity	Pf3D7_05_v3	104256	105737	ID=PF3D7_0502200;Name=PF3D7_0502200;description=conserved+Plasmodium+membrane+protein%2C+unknown+function;size=1482;web_id=PF3D7_0502200;locus_tag=PF3D7_0502200;size=1482;Alias=Q8I478,PFE0110w,XP_001351581.1,12368867,124505967,PF3D7_0502200,812850,PFE0110w,23504508,CAD51388.1,MAL5P1.23
0.00234813	0.000677507	0	Infinity	Pf3D7_14_v3	2480440	2481916	ID=PF3D7_1460900.1;Name=PF3D7_1460900.1;description=apicoplast+ribosomal+protein+S10+precursor%2C+putative;size=1477;web_id=PF3D7_1460900.1;locus_tag=PF3D7_1460900.1;size=1477;Alias=ribosomeStruct,12368864,12368867,PF3D7_1460900.1,PF14_0581,prokaryotes,PF14_0581,124810084,812163,XP_001348755.1,AAN37194.1,Q8IKM3,apicoplastgene,11738814,23497654
0.00234813	0.000677507	0	Infinity	Pf3D7_14_v3	2480440	2481916	ID=PF3D7_1460900.2;Name=PF3D7_1460900.2;description=apicoplast+ribosomal+protein+S10+precursor%2C+putative;size=1477;web_id=PF3D7_1460900.2;locus_tag=PF3D7_1460900.2;size=1477;Alias=PF3D7_1460900.2
0.00103028	0.000679348	0.000679348	1	Pf3D7_13_v3	843639	845111	ID=PF3D7_1320500;Name=PF3D7_1320500;description=SNARE+protein%2C+putative+%28SNAP23%29;size=1473;web_id=PF3D7_1320500;locus_tag=PF3D7_1320500;size=1473;Alias=CAX64304.1,MAL13P1.113,MAL13P1.113,SNAP23,225631964,XP_002809023.1,C0H5C6,296005399,rabCycle,PF3D7_1320500,813661
9.10652e-05	0.000681896	0.00102284	0.666667	Pf3D7_06_v3	293864	296797	ID=PF3D7_0607000;Name=PF3D7_0607000;description=translation+initiation+factor+IF-2%2C+putative;size=2934;web_id=PF3D7_0607000;locus_tag=PF3D7_0607000;size=2934;Alias=2270.t00246,prokaryotes,46362302,PFF0345w,XP_966060.1,C6KSR8,MAL6P1.73,PF3D7_0607000,intTranslation,12368867,86170667,PFF0345w,3885886,CAG25240.1
0.000379527	0.000682128	0	Infinity	Pf3D7_11_v3	618312	619778	ID=PF3D7_1116300;Name=PF3D7_1116300;description=peptidyl-prolyl+cis-trans+isomerase+%28CYP19C%29;size=1467;web_id=PF3D7_1116300;locus_tag=PF3D7_1116300;size=1467;Alias=XP_001347841.1,AAN35754.1,12368867,chapfold,Pf_chaperones,PF11_0170,CYP19C,124803884,23496093,Q8IIK3,PF11_0170,810717,PF3D7_1116300,12368864
0.000470495	0.000682594	0.000682594	1	Pf3D7_12_v3	1831484	1832949	ID=PF3D7_1243800;Name=PF3D7_1243800;description=microtubule+associated+katanin%2C+putative;size=1466;web_id=PF3D7_1243800;locus_tag=PF3D7_1243800;size=1466;Alias=811473,microtubuleDynam,124806760,2277.t00421,PFL2105c,MAL12P1.419,23496954,XP_001350825.1,AAN36505.1,Q8I4Z2,12368864,PFL2105c,PF3D7_1243800
0.00313238	0.000684463	0	Infinity	Pf3D7_13_v3	465091	466552	ID=PF3D7_1310600;Name=PF3D7_1310600;description=secretory+complex+protein+61+alpha%2CRab+GTPase+5b+%28Sec61-alpha%29;size=1462;web_id=PF3D7_1310600;locus_tag=PF3D7_1310600;size=1462;Alias=Q8WPZ5,17932874,124512956,XP_001349834.1,23615251,proteins,Q76NM7,813940,MAL13P1.51,rabIntracellular,Sec61-alpha,MAL13P1.51,endos_mat,CAD19466.1,PF13_0057,PF3D7_1310600,CAD52241.1,rabCycle
0.00103506	0.000684697	0.000342349	2	Pf3D7_14_v3	815324	818245	ID=PF3D7_1419600;Name=PF3D7_1419600;description=conserved+Plasmodium+protein%2C+unknown+function;size=2922;web_id=PF3D7_1419600;locus_tag=PF3D7_1419600;size=2922;Alias=PF14_0190,redoxReg,XP_001348363.1,Q8ILQ4,AAN36802.1,PF14_0190,811771,PF3D7_1419600,12368864,124808617,23497256
0.00066209	0.000685401	0.0013708	0.5	Pf3D7_14_v3	865346	866805	ID=PF3D7_1420900;Name=PF3D7_1420900;description=mannose-1-phosphate+guanyltransferase%2C+putative;size=1460;web_id=PF3D7_1420900;locus_tag=PF3D7_1420900;size=1460;Alias=23497269,mannosemetpath,Q8ILP1,AAN36815.1,12368864,PF14_0774,PF3D7_1420900,124808663,XP_001348376.1,811784,PF14_0774
0.0028986	0.000686342	0	Infinity	Pf3D7_06_v3	533907	535364	ID=PF3D7_0613000.1;Name=PF3D7_0613000.1;description=conserved+Plasmodium+protein%2C+unknown+function;size=1458;web_id=PF3D7_0613000.1;locus_tag=PF3D7_0613000.1;size=1458;Alias=12368867,PFF0630c,MAL6P1.295,C6KSX3,PF3D7_0613000.1,296004654,225631733,PFF0630c,XP_966117.2,CAG25369.2,2270.t00022,3885778
0.0028986	0.000686342	0	Infinity	Pf3D7_06_v3	533907	535364	ID=PF3D7_0613000.2;Name=PF3D7_0613000.2;description=conserved+Plasmodium+protein%2C+unknown+function;size=1458;web_id=PF3D7_0613000.2;locus_tag=PF3D7_0613000.2;size=1458;Alias=PF3D7_0613000.2
0.0028986	0.000686342	0	Infinity	Pf3D7_06_v3	533907	535364	ID=PF3D7_0613000.3;Name=PF3D7_0613000.3;description=conserved+Plasmodium+protein%2C+unknown+function;size=1458;web_id=PF3D7_0613000.3;locus_tag=PF3D7_0613000.3;size=1458;Alias=PF3D7_0613000.3
0.00154295	0.000686813	0	Infinity	Pf3D7_08_v3	283066	284522	ID=PF3D7_0805000;Name=PF3D7_0805000;description=alpha%2Fbeta+hydrolase%2C+putative;size=1457;web_id=PF3D7_0805000;locus_tag=PF3D7_0805000;size=1457;Alias=MAL8P1.138,PF3D7_0805000,2655404,11738814,225632205,296004939,MAL8P1.138,C0H4R4,XP_002808813.1,CAX64090.1,proteases
0.00100487	0.000687049	0	Infinity	Pf3D7_13_v3	1095553	1098464	ID=PF3D7_1326400;Name=PF3D7_1326400;description=translation+initiation+factor+EIF-2B+gamma+subunit%2C+putative;size=2912;web_id=PF3D7_1326400;locus_tag=PF3D7_1326400;size=2912;Alias=C0H5D7,PF3D7_1326400,225631976,MAL13P1.144,intTranslation,CAX64315.1,XP_002809034.1,MAL13P1.144,296005424,813695
0.000126172	0.000687758	0.00275103	0.25	Pf3D7_09_v3	1331349	1332803	ID=PF3D7_0933600;Name=PF3D7_0933600;description=organelle+processing+peptidase%2C+putative;size=1455;web_id=PF3D7_0933600;locus_tag=PF3D7_0933600;size=1455;Alias=proteases,CAD52011.1,AAL73121.1,importMito,Q8I2I2,813605,PFI1625c,PF3D7_0933600,124507209,23505231,12368867,nuclearGenes,PFI1625c,XP_001352201.1,21591790
0.000303604	0.000688231	0.000688231	1	Pf3D7_14_v3	1875421	1876874	ID=PF3D7_1445700;Name=PF3D7_1445700;description=conserved+Plasmodium+protein%2C+unknown+function;size=1454;web_id=PF3D7_1445700;locus_tag=PF3D7_1445700;size=1454;Alias=124809568,12368864,23497505,MCprot,XP_001348608.1,AAN37047.1,812016,PF14_0434,Q8IL16,PF14_0434,PF3D7_1445700
0.000269008	0.00068918	0.00068918	1	Pf3D7_05_v3	940249	941700	ID=PF3D7_0522600;Name=PF3D7_0522600;description=conserved+protein%2C+unknown+function;size=1452;web_id=PF3D7_0522600;locus_tag=PF3D7_0522600;size=1452;Alias=23504712,PFE1130w,Q8I3N7,124506371,CAD51590.1,MAL5P1.226,XP_001351783.1,PF3D7_0522600,813041,PFE1130w,12368867
0.000739915	0.00068918	0.00068918	1	Pf3D7_08_v3	614919	617821	ID=PF3D7_0812200;Name=PF3D7_0812200;description=trypsin-like+serine+protease%2C+putative;size=2903;web_id=PF3D7_0812200;locus_tag=PF3D7_0812200;size=2903;Alias=PF3D7_0812200,C0H4U2,MAL8P1.99,2655450,MAL8P1.98,MAL8P1.99,chaperone
0.000101356	0.000690608	0.00207182	0.333333	Pf3D7_04_v3	438887	440335	ID=PF3D7_0409200;Name=PF3D7_0409200;description=40S+ribosomal+processing+protein%2C+putative;size=1449;web_id=PF3D7_0409200;locus_tag=PF3D7_0409200;size=1449;Alias=812403,Q9U0J4,6562730,12368867,PFD0455w,124505329,MAL4P2.28,CAB62869.1,his_bind_mod,PF3D7_0409200,Ribosomegenes,XP_001351406.1,PFD0455w,riboMaturation
0.00119248	0.000691722	0.000922297	0.75	Pf3D7_11_v3	708526	712863	ID=PF3D7_1118700;Name=PF3D7_1118700;description=conserved+Plasmodium+protein%2C+unknown+function;size=4338;web_id=PF3D7_1118700;locus_tag=PF3D7_1118700;size=4338;Alias=PF3D7_1118700,12368864,810740,PF11_0193,254832639,Q8III1,XP_001347864.2,AAN35777.2,PF11_0193,258597275,PF11_0194
0.000747084	0.000693963	0.000693963	1	Pf3D7_14_v3	2729370	2730811	ID=PF3D7_1466700;Name=PF3D7_1466700;description=large+ribosomal+subunit+assembling+protein%2C+putative;size=1442;web_id=PF3D7_1466700;locus_tag=PF3D7_1466700;size=1442;Alias=PF14_0635,812217,riboMaturation,PF3D7_1466700,255528921,XP_001348809.2,PF14_0635,12368864,258597911,Q8IKH0,Ribosomegenes,AAN37248.2
0.000364494	0.000698324	0.00104749	0.666667	Pf3D7_10_v3	614872	617736	ID=PF3D7_1015200.1;Name=PF3D7_1015200.1;description=cysteinyl-tRNA+synthetase%2C+putative;size=2865;web_id=PF3D7_1015200.1;locus_tag=PF3D7_1015200.1;size=2865;Alias=12368864,proteinBiosynth,XP_001347434.2,810307,AAN35347.2,254922413,adenylyl,Q8IJP3,12368867,apicoplastgene,PF10_0149,258597035,11738814,PF3D7_1015200.1,PF10_0149
0.000364494	0.000698324	0.00104749	0.666667	Pf3D7_10_v3	614872	617736	ID=PF3D7_1015200.2;Name=PF3D7_1015200.2;description=cysteinyl-tRNA+synthetase%2C+putative;size=2865;web_id=PF3D7_1015200.2;locus_tag=PF3D7_1015200.2;size=2865;Alias=PF3D7_1015200.2
0.000585037	0.000705467	0.000352734	2	Pf3D7_10_v3	863907	866742	ID=PF3D7_1021400;Name=PF3D7_1021400;description=endomembrane+protein+70%2C+putative;size=2836;web_id=PF3D7_1021400;locus_tag=PF3D7_1021400;size=2836;Alias=810365,12368864,PF3D7_1021400,PF10_0208,Q8IJI9,PF10_0208
0.000130545	0.000706215	0.00282486	0.25	Pf3D7_06_v3	301874	303290	ID=PF3D7_0607200;Name=PF3D7_0607200;description=conserved+Plasmodium+membrane+protein%2C+unknown+function;size=1417;web_id=PF3D7_0607200;locus_tag=PF3D7_0607200;size=1417;Alias=XP_966062.1,46362304,PFF0355c,86170678,MAL6P1.75,PFF0355c,2270.t00242,C6KSS0,3885901,CAG25242.1,12368867,PF3D7_0607200
0.000724165	0.000708717	0	Infinity	Pf3D7_14_v3	1937706	1939117	ID=PF3D7_1447400;Name=PF3D7_1447400;description=conserved+Plasmodium+protein%2C+unknown+function;size=1412;web_id=PF3D7_1447400;locus_tag=PF3D7_1447400;size=1412;Alias=12368864,C6S3I8,ACU12412.1,PF3D7_1447400,PF14_0790,258549210,8444982,PF14_0790,255528869,XP_002585464.1
0.000104162	0.000709723	0.00212917	0.333333	Pf3D7_10_v3	365737	367146	ID=PF3D7_1008800;Name=PF3D7_1008800;description=small+subunit+rRNA+processing+protein%2C+putative;size=1410;web_id=PF3D7_1008800;locus_tag=PF3D7_1008800;size=1410;Alias=AAN35283.1,124802116,PF3D7_1008800,PF10_0085,Ribosomegenes,XP_001347370.1,PF10_0085,Q8IJV7,12368867,12368864,23494949,810243,riboMaturation
0.000513215	0.000711238	0.000711238	1	Pf3D7_03_v3	865014	866420	ID=PF3D7_0320700;Name=PF3D7_0320700;description=signal+peptidase+complex+subunit+2%2C+putative+%28SPC2%29;size=1407;web_id=PF3D7_0320700;locus_tag=PF3D7_0320700;size=1407;Alias=SPC2,814521,Q9NFA0,8052279,10448855,12368867,PFC0912w,124505071,CAB92303.1,eukaryotes,PF3D7_0320700,XP_001351277.1,PFC0912w
0.000103399	0.000711238	0.00142248	0.5	Pf3D7_13_v3	1828283	1829689	ID=PF3D7_1345700;Name=PF3D7_1345700;description=isocitrate+dehydrogenase+%28NADP%29%2C+mitochondrial+precursor+%28IDH%29;size=1407;web_id=PF3D7_1345700;locus_tag=PF3D7_1345700;size=1407;Alias=PF13_0242,CAD52580.1,814208,mitochondrTCAcycle,124513630,XP_001350171.1,Q8I6T2,12368867,23615588,nuclearGenes,IDH,655456,PF13_0242,PF3D7_1345700
0.000753468	0.000711744	0.00266904	0.266667	Pf3D7_12_v3	941125	946745	ID=PF3D7_1223400;Name=PF3D7_1223400;description=phospholipid-transporting+ATPase%2C+putative;size=5621;web_id=PF3D7_1223400;locus_tag=PF3D7_1223400;size=5621;Alias=12368867,MAL12P1.225,PFL1125w,811277,23496756,PFL1125w,AAN36311.1,Q8I5I3,PF3D7_1223400,2277.t00225,PPM,12368864,transporters,XP_001350631.1,124806112
0.00145325	0.000712251	0.000712251	1	Pf3D7_10_v3	422961	424365	ID=PF3D7_1010700;Name=PF3D7_1010700;description=dolichyl-phosphate-mannose+protein+mannosyltransferase%2C+putative;size=1405;web_id=PF3D7_1010700;locus_tag=PF3D7_1010700;size=1405;Alias=protER,PF10_0104,PF10_0104,23494968,XP_001347389.1,PF3D7_1010700,12368864,124802173,AAN35302.1,810262,Q8IJT8
0.000724713	0.000712758	0	Infinity	Pf3D7_11_v3	1777525	1778928	ID=PF3D7_1144900;Name=PF3D7_1144900;description=Rab+GTPase+6+%28RAB6%29;size=1404;web_id=PF3D7_1144900;locus_tag=PF3D7_1144900;size=1404;Alias=PF11_0461,XP_001348128.2,proteins,AAN36041.2,rabCycle,RAB6,254832720,largeTethering,Q8IHR8,PF3D7_1144900,811004,PF11_0461,258597414,rabIntracellular
0.000129772	0.000712758	0.00213828	0.333333	Pf3D7_07_v3	935497	936900	ID=PF3D7_0721700;Name=PF3D7_0721700;description=secreted+ookinete+protein%2C+putative+%28PSOP1%29;size=1404;web_id=PF3D7_0721700;locus_tag=PF3D7_0721700;size=1404;Alias=Q8IBN4,2655133,124511972,PF3D7_0721700,11738814,23498887,PF07_0089,PSOP1,CAD50965.1,XP_001349119.1,PF07_0089
0.000570677	0.000714286	0.000714286	1	Pf3D7_08_v3	881590	884390	ID=PF3D7_0819500;Name=PF3D7_0819500;description=conserved+protein%2C+unknown+function;size=2801;web_id=PF3D7_0819500;locus_tag=PF3D7_0819500;size=2801;Alias=PF3D7_0819500,MAL8P1.63,225632257,CAX64138.1,2655389,C0H4W0,MAL8P1.63,296005046,12368867,XP_002808860.1
0.000498161	0.000715308	0	Infinity	Pf3D7_11_v3	1296801	1298199	ID=PF3D7_1133500;Name=PF3D7_1133500;description=conserved+Plasmodium+protein%2C+unknown+function;size=1399;web_id=PF3D7_1133500;locus_tag=PF3D7_1133500;size=1399;Alias=PF3D7_1133500,12368864,PF11_0345,AAN35929.1,124804482,Q8II30,810892,XP_001348016.1,PF11_0345,23496271
0.00124366	0.000715308	0.000715308	1	Pf3D7_09_v3	489467	490865	ID=PF3D7_0910600;Name=PF3D7_0910600;description=SNARE+protein+%28Ykt6.1%29;size=1399;web_id=PF3D7_0910600;locus_tag=PF3D7_0910600;size=1399;Alias=PF3D7_0910600,109692345,clathrintransport,23505006,PFI0515w,Ykt6.1,COPII,Q8I346,813383,ABG38009.1,XP_001351978.1,CAD51789.1,COPI,124506761,rabCycle,PFI0515w
0.0020164	0.000716332	0.002149	0.333333	Pf3D7_03_v3	840362	841758	ID=PF3D7_0320100;Name=PF3D7_0320100;description=SNARE+protein+%28SEC22%29;size=1397;web_id=PF3D7_0320100;locus_tag=PF3D7_0320100;size=1397;Alias=COPI,COPII,SEC22,814515,O97323,8052277,MAL3P7.7,PFC0890w,rabCycle,109692347,124505059,ABG38010.1,CAB39075.2,PF3D7_0320100,XP_001351271.1,PFC0890w,clathrintransport
0.000155881	0.000717103	0.00250986	0.285714	Pf3D7_13_v3	2187435	2190224	ID=PF3D7_1355100;Name=PF3D7_1355100;description=minchromosome+maintenance+%28MCM%29+complex+subunit+%28MCM6%29;size=2790;web_id=PF3D7_1355100;locus_tag=PF3D7_1355100;size=2790;Alias=PF13_0291,replicationForm,PF13_0291,Q8IDF0,MCM6,23615680,CAD52672.1,814255,hist_chap,124513814,PF3D7_1355100,XP_001350263.1
0.00134408	0.000718133	0.000718133	1	Pf3D7_12_v3	732174	734959	ID=PF3D7_1218600;Name=PF3D7_1218600;description=arginyl-tRNA+synthetase%2C+putative;size=2786;web_id=PF3D7_1218600;locus_tag=PF3D7_1218600;size=2786;Alias=23496712,XP_001350588.1,MAL12P1.180,adenylyl,apicoplastgene,811232,PFL0900c,proteinBiosynth,Q8I5M2,arginineproline,124805963,11738814,PF3D7_1218600,AAN36268.1,2277.t00180,PFL0900c,12368864
0.000328365	0.000718391	0	Infinity	Pf3D7_13_v3	683084	684476	ID=PF3D7_1316400;Name=PF3D7_1316400;description=conserved+Plasmodium+protein%2C+unknown+function;size=1393;web_id=PF3D7_1316400;locus_tag=PF3D7_1316400;size=1393;Alias=23615317,MAL13P1.85,813976,PF3D7_1316400,124513088,XP_001349900.1,MAL13P1.85,CAD52308.1,Q8IEF1
0.000902896	0.000718391	0	Infinity	Pf3D7_09_v3	861392	862784	ID=PF3D7_0921100;Name=PF3D7_0921100;description=conserved+Plasmodium+protein%2C+unknown+function;size=1393;web_id=PF3D7_0921100;locus_tag=PF3D7_0921100;size=1393;Alias=813487,C0H547,PFI1035w,12368867,PFI1035w,PF3D7_0921100
0.000169169	0.000719424	0.00143885	0.5	Pf3D7_14_v3	2553714	2555104	ID=PF3D7_1462700;Name=PF3D7_1462700;description=cytochrome+c1+precursor%2C+putative;size=1391;web_id=PF3D7_1462700;locus_tag=PF3D7_1462700;size=1391;Alias=12368864,PF14_0597,124810129,12368867,23497671,XP_001348771.1,Q8I6U9,PF3D7_1462700,812179,porphyrinmetpath,nuclearGenes,mitochondrionef,PF14_0597,AAN37210.1
3.03282e-05	0.000720461	0	Infinity	Pf3D7_14_v3	1244018	1245406	ID=PF3D7_1431600;Name=PF3D7_1431600;description=ATP-specific+succinyl-CoA+synthetase+beta+subunit%2C+putative;size=1389;web_id=PF3D7_1431600;locus_tag=PF3D7_1431600;size=1389;Alias=PF3D7_1431600,PF14_0295,811877,mitochondrTCAcycle,23497363,PF14_0295,124809017,12368867,12368864,Q8ILE9,AAN36908.1,XP_001348469.1,nuclearGenes
0.00206572	0.000720461	0	Infinity	Pf3D7_10_v3	1176461	1177849	ID=PF3D7_1028600;Name=PF3D7_1028600;description=conserved+Plasmodium+protein%2C+unknown+function;size=1389;web_id=PF3D7_1028600;locus_tag=PF3D7_1028600;size=1389;Alias=124802689,PF10_0280,PF3D7_1028600,810437,23495146,XP_001347564.1,Q8IJB8,12368864,AAN35477.1,PF10_0280
0.000175993	0.000721848	0.00240616	0.3	Pf3D7_02_v3	645929	650085	ID=PF3D7_0215700;Name=PF3D7_0215700;description=DNA-directed+RNA+polymerase+II+second+largest+subunit%2C+putative;size=4157;web_id=PF3D7_0215700;locus_tag=PF3D7_0215700;size=4157;Alias=812744,O96236,9804551,12368864,12368867,PFB0715w,254688481,258596921,PF02_0148,RNApolyII,AAC71932.3,PF3D7_0215700,RNApolyStruct,XP_001349662.2,PFB0715w
0.000495698	0.000722022	0.00144404	0.5	Pf3D7_04_v3	369885	371270	ID=PF3D7_0407500;Name=PF3D7_0407500;description=mitochondrial+carrier+protein%2C+putative;size=1386;web_id=PF3D7_0407500;locus_tag=PF3D7_0407500;size=1386;Alias=C0H498,9221793,12368867,PFD0367w,PFD0370w,225631629,296004406,MAL4P2.11,CAX63916.1,transporters,PF3D7_0407500,mitochonApico,XP_002808646.1,PFD0367w
0.000502131	0.000723066	0.000723066	1	Pf3D7_14_v3	1828579	1829962	ID=PF3D7_1444300;Name=PF3D7_1444300;description=apicoplast+1-acyl-sn-glycerol-3-phosphate+acyltransferase%2C+putative;size=1384;web_id=PF3D7_1444300;locus_tag=PF3D7_1444300;size=1384;Alias=258597816,Q8IL28,812003,255528862,PF3D7_1444300,12368864,XP_001348595.2,facidsynthesispath,PF14_0421,utilPhospho,PF14_0421,AAN37034.2,phserine
0.00164124	0.000726744	0.00145349	0.5	Pf3D7_08_v3	324279	325655	ID=PF3D7_0805900;Name=PF3D7_0805900;description=conserved+Plasmodium+protein%2C+unknown+function;size=1377;web_id=PF3D7_0805900;locus_tag=PF3D7_0805900;size=1377;Alias=PF3D7_0805900,C0H4R9,MAL8P1.136,MAL8P1.136,2655225
0.000198659	0.000728332	0.00145666	0.5	Pf3D7_02_v3	223478	224851	ID=PF3D7_0205400;Name=PF3D7_0205400;description=conserved+Plasmodium+protein%2C+unknown+function;size=1374;web_id=PF3D7_0205400;locus_tag=PF3D7_0205400;size=1374;Alias=812646,O96149,9804551,12368864,23503364,PFB0240w,124800953,PF02_0050,AAC71837.2,PF3D7_0205400,XP_001349564.1,PFB0240w,proteaUbiqpath
0.000433167	0.000728332	0.00145666	0.5	Pf3D7_14_v3	551862	553235	ID=PF3D7_1413900;Name=PF3D7_1413900;description=DnaJ+protein%2C+putative;size=1374;web_id=PF3D7_1413900;locus_tag=PF3D7_1413900;size=1374;Alias=AAN36749.1,PF14_0137,XP_001348310.1,12368864,Pf_chaperones,23497202,PF14_0137,811718,Q8ILV6,124808429,PF3D7_1413900
0.000351144	0.000732601	0.0014652	0.5	Pf3D7_14_v3	1507359	1510089	ID=PF3D7_1437200;Name=PF3D7_1437200;description=ribonucleoside-diphosphate+reductase%2C+large+subunit;size=2731;web_id=PF3D7_1437200;locus_tag=PF3D7_1437200;size=2731;Alias=PF14_0352,124809244,PF3D7_1437200,redoxmetpath,811934,redoxReg,AAN36965.1,XP_001348526.1,Q8IL94,PF14_0352,23497421,12368864,pyrimidinemetpath
0.000710235	0.000734214	0	Infinity	Pf3D7_14_v3	2493400	2494762	ID=PF3D7_1461400;Name=PF3D7_1461400;description=conserved+Plasmodium+protein%2C+unknown+function;size=1363;web_id=PF3D7_1461400;locus_tag=PF3D7_1461400;size=1363;Alias=12368864,PF14_0586,812168,PF14_0586,histoneMethylation,AAN37199.2,XP_001348760.2,PF3D7_1461400,Q8IKL8,258597886,255528904
5.39176e-05	0.000734754	0.000734754	1	Pf3D7_07_v3	863452	864813	ID=PF3D7_0719800;Name=PF3D7_0719800;description=conserved+Plasmodium+protein%2C+unknown+function;size=1362;web_id=PF3D7_0719800;locus_tag=PF3D7_0719800;size=1362;Alias=23498867,PF3D7_0719800,2655125,PF07_0081,CAD50945.1,124511932,XP_001349099.1,11738814,PF07_0081,Q8IBQ4
5.50655e-05	0.000736377	0.000736377	1	Pf3D7_03_v3	577008	578366	ID=PF3D7_0314300;Name=PF3D7_0314300;description=DER1-like+protein+%28Der1-2%29;size=1359;web_id=PF3D7_0314300;locus_tag=PF3D7_0314300;size=1359;Alias=Der1-2,MAL3P5.4,PFC0590c,PF3D7_0314300
0.000652858	0.00073692	0.00221076	0.333333	Pf3D7_09_v3	567283	568640	ID=PF3D7_0912900;Name=PF3D7_0912900;description=26S+proteasome+regulatory+subunit%2C+putative;size=1358;web_id=PF3D7_0912900;locus_tag=PF3D7_0912900;size=1358;Alias=124506807,Q8I323,proteases,PFI0630w,12368867,CAD51812.1,PFI0630w,XP_001352001.1,23505029,proteasome_new,proteaUbiqpath,813406,PF3D7_0912900
0.000973962	0.000738552	0	Infinity	Pf3D7_14_v3	750330	751684	ID=PF3D7_1417700;Name=PF3D7_1417700;description=conserved+Plasmodium+protein%2C+unknown+function;size=1355;web_id=PF3D7_1417700;locus_tag=PF3D7_1417700;size=1355;Alias=XP_001348349.1,PF14_0176,Q8ILR8,124808569,PF3D7_1417700,23497241,AAN36788.1,PF14_0176,811757,12368864
0.000160112	0.00074129	0.00222387	0.333333	Pf3D7_09_v3	1028661	1030010	ID=PF3D7_0925700;Name=PF3D7_0925700;description=histone+deacetylase+%28HDAC1%29;size=1350;web_id=PF3D7_0925700;locus_tag=PF3D7_0925700;size=1350;Alias=chrom_lands,CAD51938.1,PFI1260c,AAD22407.1,23505157,813532,4545130,PF3D7_0925700,hist_chap,XP_001352127.1,acet_recog_mod,Histone,chrom_mod_prot,termilalCleavage,124507060,PFI1260c,HDAC1,Q7K6A1
0.00110806	0.00074184	0.00296736	0.25	Pf3D7_05_v3	120107	121455	ID=PF3D7_0502700;Name=PF3D7_0502700;description=conserved+Plasmodium+protein%2C+unknown+function;size=1349;web_id=PF3D7_0502700;locus_tag=PF3D7_0502700;size=1349;Alias=C0H4C2,225631658,12368867,XP_002808673.1,CAX63944.1,PFE0130c,PFE0130c,MAL5P1.27,296004504,PF3D7_0502700,812844
0.00107295	0.00074239	0	Infinity	Pf3D7_12_v3	618764	620111	ID=PF3D7_1214900;Name=PF3D7_1214900;description=conserved+Plasmodium+membrane+protein%2C+unknown+function;size=1348;web_id=PF3D7_1214900;locus_tag=PF3D7_1214900;size=1348;Alias=Q8I5Q7,124805842,2277.t00145,XP_001350553.1,PFL0720w,12368864,AAN36233.1,23496677,811197,MAL12P1.144,PFL0720w,PF3D7_1214900
0.000345619	0.000746269	0.00223881	0.333333	Pf3D7_01_v3	413760	415100	ID=PF3D7_0110700;Name=PF3D7_0110700;description=chromatin+assembly+factor+1+protein+WD40+domain%2C+putative;size=1341;web_id=PF3D7_0110700;locus_tag=PF3D7_0110700;size=1341;Alias=23510679,PFA0520c,124505845,MAL1P2.33,hist_chap,CAD49064.1,his_bind_mod,PF3D7_0110700,NucleoAssembly,XP_001351036.1,PFA0520c
0.00077457	0.000746826	0	Infinity	Pf3D7_03_v3	96568	97907	ID=PF3D7_0301700;Name=PF3D7_0301700;description=Plasmodium+exported+protein%2C+unknown+function;size=1340;web_id=PF3D7_0301700;locus_tag=PF3D7_0301700;size=1340;Alias=814335,O97336,7264040,10448855,12368867,PFC0085c,124504703,MAL3P8.15,CAB39133.2,PF3D7_0301700,XP_001351094.1,PFC0085c
0.000577423	0.000747943	0.00299177	0.25	Pf3D7_12_v3	1506932	1508269	ID=PF3D7_1236100;Name=PF3D7_1236100;description=clustered-asparagine-rich+protein;size=1338;web_id=PF3D7_1236100;locus_tag=PF3D7_1236100;size=1338;Alias=MAL12P1.347,XP_001350755.2,Q8I562,254945409,PFL1745c,12368867,AAN36435.2,2277.t00349,811401,258597555,12368864,PFL1745c,PF3D7_1236100
0.00286324	0.000749064	0.00149813	0.5	Pf3D7_10_v3	220018	221353	ID=PF3D7_1004700;Name=PF3D7_1004700;description=conserved+Plasmodium+protein%2C+unknown+function;size=1336;web_id=PF3D7_1004700;locus_tag=PF3D7_1004700;size=1336;Alias=12368864,XP_001347335.2,Q8IJZ0,PF3D7_1004700,PF10_0050,258596977,810208,254922379,PF10_0050,AAN35248.2
0.000775213	0.000749625	0	Infinity	Pf3D7_04_v3	363599	364933	ID=PF3D7_0407200;Name=PF3D7_0407200;description=peptidyl-tRNA+hydrolase+PTH2%2C+putative;size=1335;web_id=PF3D7_0407200;locus_tag=PF3D7_0407200;size=1335;Alias=812370,Q9U0L4,8248747,12368867,PFD0355c,124505289,MAL4P2.08,CAB62849.2,PF3D7_0407200,XP_001351386.1,apicoplastgene,PFD0355c,proteinBiosynth
0.00033068	0.000750188	0.00150038	0.5	Pf3D7_14_v3	1133067	1134400	ID=PF3D7_1428800;Name=PF3D7_1428800;description=transcription+initiation+TFIID-like%2C+putative;size=1334;web_id=PF3D7_1428800;locus_tag=PF3D7_1428800;size=1334;Alias=RNApolyIII,RNApolyII,Q8ILH6,XP_001348441.1,124808914,AAN36880.1,12368864,PF14_0267,811849,PF14_0267,23497335,PF3D7_1428800
0.00215768	0.000750188	0.00225056	0.333333	Pf3D7_13_v3	2865893	2867226	ID=PF3D7_1372900;Name=PF3D7_1372900;description=erythrocyte+membrane+protein+1+%28PfEMP1%29%2C+exon2%2C+pseudogene+%28VAR+pseudogene%29;size=1334;web_id=PF3D7_1372900;locus_tag=PF3D7_1372900;size=1334;Alias=cytoadherencescheme,PF3D7_1372900,MAL13P1.510,MAL13P1.510,rosetting,9222033,VAR pseudogene
0.000625081	0.000753012	0.00112952	0.666667	Pf3D7_14_v3	2658255	2660911	ID=PF3D7_1465700;Name=PF3D7_1465700;description=plasmepsin+VIII;size=2657;web_id=PF3D7_1465700;locus_tag=PF3D7_1465700;size=2657;Alias=XP_001348799.2,11738814,proteases,AAN37238.2,PF3D7_1465700,258597905,255528917,PF14_0625,PF14_0625,812207,Q8IKI0,12368864
5.53825e-05	0.000754717	0.000754717	1	Pf3D7_06_v3	139193	140518	ID=PF3D7_0603500;Name=PF3D7_0603500;description=cation%2FH++antiporter+%28CHA%29;size=1326;web_id=PF3D7_0603500;locus_tag=PF3D7_0603500;size=1326;Alias=PFF0170w,nuclearGenes,XP_966025.1,86170486,12368867,PF3D7_0603500,3885787,CAG25205.1,2270.t00280,PFF0170w,46362267,transporters,CHA,C6KSN3,MAL6P1.38
5.53825e-05	0.000754717	0.000754717	1	Pf3D7_13_v3	1127436	1128761	ID=PF3D7_1326800;Name=PF3D7_1326800;description=syntaxin%2C+Qa-SNARE+family+%28SYN18%29;size=1326;web_id=PF3D7_1326800;locus_tag=PF3D7_1326800;size=1326;Alias=C0H5E1,MAL13P1.365,ABG38006.1,MAL13P1.365,PF3D7_1326800,XP_002809038.1,225631980,296005432,SYN18,9221984,rabCycle,CAX64319.1,109692339
0.000925379	0.000755287	0.000755287	1	Pf3D7_09_v3	886065	887389	ID=PF3D7_0921800;Name=PF3D7_0921800;description=nucleolar+preribosomal+assembly+protein%2C+putative;size=1325;web_id=PF3D7_0921800;locus_tag=PF3D7_0921800;size=1325;Alias=CAX64226.1,XP_002808945.1,12368867,225631831,C0H549,riboMaturation,813494,PFI1070c,PFI1070c,296005227,PF3D7_0921800,Ribosomegenes
0.00214144	0.00075815	0.00075815	1	Pf3D7_11_v3	430157	431476	ID=PF3D7_1110800;Name=PF3D7_1110800;description=conserved+Plasmodium+protein%2C+unknown+function;size=1320;web_id=PF3D7_1110800;locus_tag=PF3D7_1110800;size=1320;Alias=XP_002585426.1,PF11_0114a,ACT82969.1,PF3D7_1110800,258549110,12368864,PF11_0114a,C6S3E9,8445041,254832616
8.34516e-05	0.00075815	0.0015163	0.5	Pf3D7_13_v3	2000681	2002000	ID=PF3D7_1349800;Name=PF3D7_1349800;description=nucleolar+preribosomal+associated+cytoplasmic+ATPase%2C+putative;size=1320;web_id=PF3D7_1349800;locus_tag=PF3D7_1349800;size=1320;Alias=PF3D7_1349800,12368867,PF13_0261,CAD52620.1,PF13_0261,814226,excisionrepair,Q8IDK1,124513710,XP_001350211.1,23615628
0.000268799	0.000758725	0.000758725	1	Pf3D7_04_v3	701526	704162	ID=PF3D7_0416000;Name=PF3D7_0416000;description=RNA+binding+protein%2C+putative;size=2637;web_id=PF3D7_0416000;locus_tag=PF3D7_0416000;size=2637;Alias=812542,Q8I1S7,12368867,23498226,PFD0775c,124505453,CAD49197.1,MAL4P1.150,PF3D7_0416000,XP_001351468.1,PFD0775c
0.000842404	0.000760456	0	Infinity	Pf3D7_14_v3	2446983	2448298	ID=PF3D7_1459800;Name=PF3D7_1459800;description=conserved+Plasmodium+membrane+protein%2C+unknown+function;size=1316;web_id=PF3D7_1459800;locus_tag=PF3D7_1459800;size=1316;Alias=258597880,AAN37184.2,PF14_0571,XP_001348745.2,812153,Q8IKN3,255528900,PF14_0571,12368864,PF3D7_1459800
0.00135877	0.000761035	0.00152207	0.5	Pf3D7_14_v3	1105200	1106514	ID=PF3D7_1428300;Name=PF3D7_1428300;description=proliferation-associated+protein+2g4%2C+putative;size=1315;web_id=PF3D7_1428300;locus_tag=PF3D7_1428300;size=1315;Alias=124808890,12368864,12368867,811843,proteases,PF3D7_1428300,23497329,AAN36874.1,Q8ILI2,PF14_0261,XP_001348435.1,PF14_0261
0.00122885	0.000763359	0	Infinity	Pf3D7_13_v3	1316496	1317806	ID=PF3D7_1331600;Name=PF3D7_1331600;description=protein+tyrosine+phosphatase%2C+putative;size=1311;web_id=PF3D7_1331600;locus_tag=PF3D7_1331600;size=1311;Alias=296005452,MAL13P1.168,PF3D7_1331600,XP_002809048.1,phosphorylation,C0H5F1,CAX64329.1,MAL13P1.168,225631990,Phos_tmd_exprs,813721
0.000202253	0.000765697	0.000765697	1	Pf3D7_01_v3	299562	300868	ID=PF3D7_0107300;Name=PF3D7_0107300;description=probable+protein%2C+unknown+function;size=1307;web_id=PF3D7_0107300;locus_tag=PF3D7_0107300;size=1307;Alias=23510647,PFA0360c,124505781,MAL1P1.65,CAD49032.1,PF3D7_0107300,XP_001351004.1,PFA0360c
0.00186772	0.00076746	0.00076746	1	Pf3D7_05_v3	605027	606330	ID=PF3D7_0514500;Name=PF3D7_0514500;description=conserved+Plasmodium+membrane+protein%2C+unknown+function;size=1304;web_id=PF3D7_0514500;locus_tag=PF3D7_0514500;size=1304;Alias=812959,PFE0725c,296004538,MAL5P1.145,PF3D7_0514500,C0H4D9,PFE0725c,225631675,12368867,XP_002808690.1,CAX63961.1
0.00182557	0.00076864	0.00230592	0.333333	Pf3D7_13_v3	418820	420121	ID=PF3D7_1309100;Name=PF3D7_1309100;description=60S+ribosomal+protein+L24%2C+putative;size=1302;web_id=PF3D7_1309100;locus_tag=PF3D7_1309100;size=1302;Alias=CAD52226.1,23615236,Q8IEM3,XP_001349819.1,PF13_0049,12368867,PF3D7_1309100,PF13_0049,ribosomeStruct,814028,124512926
0.000563983	0.000769823	0.00307929	0.25	Pf3D7_06_v3	916000	917299	ID=PF3D7_0622700;Name=PF3D7_0622700;description=conserved+Plasmodium+membrane+protein%2C+unknown+function;size=1300;web_id=PF3D7_0622700;locus_tag=PF3D7_0622700;size=1300;Alias=CAG25039.1,3885857,11738814,MAL6P1.202,12368867,XP_966209.1,C6KT63,2270.t00115,46361175,PFF1090c,PFF1090c,PF3D7_0622700,86171426
0.000290665	0.000773994	0.00154799	0.5	Pf3D7_10_v3	117242	118534	ID=PF3D7_1002300;Name=PF3D7_1002300;description=conserved+Plasmodium+protein%2C+unknown+function;size=1293;web_id=PF3D7_1002300;locus_tag=PF3D7_1002300;size=1293;Alias=810185,XP_001347312.2,Q8IK13,PF10_0027,11738814,258596965,254922372,PF10_0027,PF3D7_1002300,AAN35225.2,12368864
0.00143478	0.000776398	0	Infinity	Pf3D7_13_v3	1835511	1836799	ID=PF3D7_1345900;Name=PF3D7_1345900;description=conserved+Plasmodium+protein%2C+unknown+function;size=1289;web_id=PF3D7_1345900;locus_tag=PF3D7_1345900;size=1289;Alias=MAL13P1.229,CAX64353.1,C0H5H5,XP_002809072.1,813787,225632016,296005504,MAL13P1.229,PF3D7_1345900
0.0016019	0.000776398	0.000776398	1	Pf3D7_06_v3	1015868	1018444	ID=PF3D7_0624900;Name=PF3D7_0624900;description=conserved+Plasmodium+protein%2C+unknown+function;size=2577;web_id=PF3D7_0624900;locus_tag=PF3D7_0624900;size=2577;Alias=C6KT85,MAL6P1.179,XP_966231.2,296004720,PF3D7_0624900,3885978,225631766,CAG25061.2,2270.t00135,MAL6P1.180,PFF1205w,12368867,PFF1200w,PFF1200w
0.000483818	0.000777907	0.000777907	1	Pf3D7_10_v3	399207	401778	ID=PF3D7_1009900;Name=PF3D7_1009900;description=conserved+Plasmodium+protein%2C+unknown+function;size=2572;web_id=PF3D7_1009900;locus_tag=PF3D7_1009900;size=2572;Alias=AAN35294.1,PF3D7_1009900,Q8IJU6,PF10_0096,12368864,XP_001347381.1,23494960,PF10_0096,124802145,810254
0.000113312	0.000779423	0.00155885	0.5	Pf3D7_06_v3	950223	951506	ID=PF3D7_0623400;Name=PF3D7_0623400;description=RNA-binding+protein+mei2+homologue%2C+putative;size=1284;web_id=PF3D7_0623400;locus_tag=PF3D7_0623400;size=1284;Alias=2270.t00121,86171461,C6KT70,46361182,3885870,MAL6P1.195,PFF1125c,PF3D7_0623400,XP_966216.1,CAG25046.1,12368867,PFF1125c
0.000197408	0.00078125	0.003125	0.25	Pf3D7_09_v3	187342	188622	ID=PF3D7_0904000;Name=PF3D7_0904000;description=GTPase+activator%2C+putative;size=1281;web_id=PF3D7_0904000;locus_tag=PF3D7_0904000;size=1281;Alias=Q8I3A9,124506633,XP_001351914.1,PFI0195c,CAD51725.1,813319,23504941,PFI0195c,PF3D7_0904000,12368867,rabCycle
0.000621013	0.000781861	0.000781861	1	Pf3D7_02_v3	211348	212627	ID=PF3D7_0204900;Name=PF3D7_0204900;description=ubiE%2FCOQ5+methyltransferase%2C+putative;size=1280;web_id=PF3D7_0204900;locus_tag=PF3D7_0204900;size=1280;Alias=812642,O96145,3845127,9804551,12368864,12368867,PFB0220w,124800777,PF02_0046,AAC71833.1,nuclearGenes,PF3D7_0204900,XP_001349560.1,PFB0220w,ubiquinonemetpath
0.000893519	0.000782473	0	Infinity	Pf3D7_11_v3	842991	845547	ID=PF3D7_1122200;Name=PF3D7_1122200;description=conserved+Plasmodium+protein%2C+unknown+function;size=2557;web_id=PF3D7_1122200;locus_tag=PF3D7_1122200;size=2557;Alias=810777,12368864,XP_001347901.2,Q8IIE4,AAN35814.2,PF11_0230,PF11_0230,11738814,254832650,258597298,PF3D7_1122200
0.00038212	0.000783699	0	Infinity	Pf3D7_13_v3	2052108	2053384	ID=PF3D7_1351400;Name=PF3D7_1351400;description=60S+ribosomal+protein+L17%2C+putative;size=1277;web_id=PF3D7_1351400;locus_tag=PF3D7_1351400;size=1277;Alias=PF13_0268,814233,12368867,124513742,PF3D7_1351400,ribosomeStruct,CAD52636.1,PF13_0268,23615644,Q8IDI5,XP_001350227.1
0.0012037	0.000783699	0.000783699	1	Pf3D7_11_v3	1199253	1201805	ID=PF3D7_1131200;Name=PF3D7_1131200;description=conserved+Plasmodium+protein%2C+unknown+function;size=2553;web_id=PF3D7_1131200;locus_tag=PF3D7_1131200;size=2553;Alias=124804405,AAN35906.1,810869,12368864,XP_001347993.1,PF3D7_1131200,PF11_0322,PF11_0322,Q8II52,23496247
5.75995e-05	0.000784929	0.000784929	1	Pf3D7_07_v3	91867	93141	ID=PF3D7_0702200;Name=PF3D7_0702200;description=lysophospholipase%2C+putative;size=1275;web_id=PF3D7_0702200;locus_tag=PF3D7_0702200;size=1275;Alias=PF07_0005,CAD50795.1,utilPhospho,PF3D7_0702200,phcholine,Q8IC45,23498725,PF07_0005,phserine,124511648,XP_001348957.1,2654972,12368867
0.00096719	0.000785546	0	Infinity	Pf3D7_14_v3	92264	93537	ID=PF3D7_1402500;Name=PF3D7_1402500;description=40S+ribosomal+protein+S31%2FUBI%2C+putative;size=1274;web_id=PF3D7_1402500;locus_tag=PF3D7_1402500;size=1274;Alias=PF14_0027,811609,PF3D7_1402500,124808012,12368864,AAN36639.1,ribosomeStruct,Q8IM64,12368867,PF14_0027,23497090,XP_001348200.1
0.000400206	0.000786164	0.00157233	0.5	Pf3D7_13_v3	2685059	2686331	ID=PF3D7_1367300;Name=PF3D7_1367300;description=conserved+Plasmodium+protein%2C+unknown+function;size=1273;web_id=PF3D7_1367300;locus_tag=PF3D7_1367300;size=1273;Alias=MAL13P1.340,23615801,CAD52793.1,12368867,813908,MAL13P1.340,PF3D7_1367300,Q8ID35,124514056,XP_001350384.1
0.000233147	0.000786782	0.000786782	1	Pf3D7_06_v3	1119587	1120858	ID=PF3D7_0627900;Name=PF3D7_0627900;description=conserved+Plasmodium+protein%2C+unknown+function;size=1272;web_id=PF3D7_0627900;locus_tag=PF3D7_0627900;size=1272;Alias=riboMaturation,PF3D7_0627900,296004730,12368867,CAG25092.2,PFF1355w,XP_966262.2,C6KTB5,Ribosomegenes,MAL6P1.149,PFF1355w,mRNAdeg,2270.t00166,3885699,225631771
0.000374431	0.000792079	0	Infinity	Pf3D7_13_v3	647986	650511	ID=PF3D7_1315400;Name=PF3D7_1315400;description=zinc+finger+%28CCCH+type%29+protein%2C+putative;size=2526;web_id=PF3D7_1315400;locus_tag=PF3D7_1315400;size=2526;Alias=225631953,MAL13P1.80,C0H5B6,XP_002809013.1,MAL13P1.79,MAL13P1.79,CAX64294.1,296005377,PF3D7_1315400,813969
0.00024436	0.000793651	0.000793651	1	Pf3D7_03_v3	314976	316236	ID=PF3D7_0307200;Name=PF3D7_0307200;description=60S+ribosomal+protein+L7%2C+putative;size=1261;web_id=PF3D7_0307200;locus_tag=PF3D7_0307200;size=1261;Alias=814389,O97250,10448855,12368867,15375389,PFC0300c,124504809,MAL3P2.29,CAB39016.2,PF3D7_0307200,XP_001351147.1,PFC0300c,riboMaturation,ribosomeStruct
0.000855456	0.000793651	0.000793651	1	Pf3D7_06_v3	656376	657636	ID=PF3D7_0615700;Name=PF3D7_0615700;description=RNA+and+export+factor+binding+protein%2C+putative;size=1261;web_id=PF3D7_0615700;locus_tag=PF3D7_0615700;size=1261;Alias=2270.t00472,qualityControl,12368867,PF3D7_0615700,C6KSZ8,CAG25395.1,PFF0760w,46361108,PFF0760w,3885869,XP_966143.1,MAL6P1.269,bulk_mRna,86171081
5.8425e-05	0.000796178	0.000796178	1	Pf3D7_13_v3	978965	980221	ID=PF3D7_1323600;Name=PF3D7_1323600;description=conserved+Plasmodium+protein%2C+unknown+function;size=1257;web_id=PF3D7_1323600;locus_tag=PF3D7_1323600;size=1257;Alias=12368867,CAD52384.1,XP_001349976.1,814105,PF13_0134,PF3D7_1323600,124513240,PF13_0134,11738814,Q8IE81,23615393
0.000808182	0.000797766	0.00119665	0.666667	Pf3D7_03_v3	402933	405440	ID=PF3D7_0309500;Name=PF3D7_0309500;description=asparagine+synthetase%2C+putative;size=2508;web_id=PF3D7_0309500;locus_tag=PF3D7_0309500;size=2508;Alias=814410,O77330,3649765,10448855,12368867,PFC0395w,124504851,MAL3P3.14,CAB11114.1,PF3D7_0309500,alanAspartate,XP_001351168.1,PFC0395w
0.000201624	0.000799361	0	Infinity	Pf3D7_13_v3	1165307	1166558	ID=PF3D7_1327900;Name=PF3D7_1327900;description=conserved+Plasmodium+protein%2C+unknown+function;size=1252;web_id=PF3D7_1327900;locus_tag=PF3D7_1327900;size=1252;Alias=PF3D7_1327900
0.000504458	0.000800641	0.000800641	1	Pf3D7_14_v3	2559098	2560347	ID=PF3D7_1462800;Name=PF3D7_1462800;description=glyceraldehyde-3-phosphate+dehydrogenase+%28GAPDH%29;size=1250;web_id=PF3D7_1462800;locus_tag=PF3D7_1462800;size=1250;Alias=812180,PF14_0598,Pfal007254AAA,83753748,glycolysispath,redoxReg,19401842,Q8IKK7,23497672,PF3D7_1462800,XP_001348772.1,MCprot,AAN37211.1,83753750,83753749,83753751,protPV,PF14_0598,124810131,1YWG,AAL87686.1,GAPDH
9.04336e-05	0.000801925	0.000801925	1	Pf3D7_14_v3	2306955	2308202	ID=PF3D7_1456300;Name=PF3D7_1456300;description=conserved+Plasmodium+protein%2C+unknown+function;size=1248;web_id=PF3D7_1456300;locus_tag=PF3D7_1456300;size=1248;Alias=812118,12368864,PF14_0536,AAN37149.1,23497609,124809891,XP_001348710.1,PF3D7_1456300,PF14_0536,Q8IKR6
0.00223249	0.000801925	0.00288693	0.277778	Pf3D7_04_v3	626891	633126	ID=PF3D7_0414000;Name=PF3D7_0414000;description=chromosome+associated+protein%2C+putative;size=6236;web_id=PF3D7_0414000;locus_tag=PF3D7_0414000;size=6236;Alias=812569,Q8I1U7,12368867,23498206,75015107,PFD0685c,Q8I1U7.1,124505413,CAD49177.1,MAL4P1.132,protProphase,PF3D7_0414000,XP_001351448.1,PFD0685c
0.000238129	0.000805802	0.0016116	0.5	Pf3D7_04_v3	670883	672124	ID=PF3D7_0415100;Name=PF3D7_0415100;description=conserved+Plasmodium+protein%2C+unknown+function;size=1242;web_id=PF3D7_0415100;locus_tag=PF3D7_0415100;size=1242;Alias=812560,Q8I1T7,12368867,23498216,PFD0730w,124505433,CAD49187.1,MAL4P1.141,PF3D7_0415100,XP_001351458.1,PFD0730w
0.000273034	0.000807103	0.00322841	0.25	Pf3D7_06_v3	1250412	1251651	ID=PF3D7_0629900;Name=PF3D7_0629900;description=sec14-like+cytosolic+factor+or+phosphatidylinositol%2Fphosphatidylcholine+transfer+protein%2C+putative;size=1240;web_id=PF3D7_0629900;locus_tag=PF3D7_0629900;size=1240;Alias=PF3D7_0629900,2270.t00186,clathrintransport,MAL6P1.129,PFF1450w,CAG25111.1,XP_966281.1,46361250,86171797,3885752,PFF1450w,12368867,phcholine,C6KTD4,inosiPhosphmetpath
0.00212991	0.000807972	0.00161594	0.5	Pf3D7_05_v3	1157840	1161553	ID=PF3D7_0528100;Name=PF3D7_0528100;description=beta+adaptin+protein%2C+putative;size=3714;web_id=PF3D7_0528100;locus_tag=PF3D7_0528100;size=3714;Alias=XP_001351835.2,12368867,225631706,PF3D7_0528100,CAD51642.2,296004600,sub_loc_adapt,Q8I3I6,PFE1400c,PFE1400c,MAL5P1.278,clathrintransport,813094
0.000909642	0.000809061	0.000809061	1	Pf3D7_12_v3	611892	613128	ID=PF3D7_1214500;Name=PF3D7_1214500;description=conserved+Plasmodium+protein%2C+unknown+function;size=1237;web_id=PF3D7_1214500;locus_tag=PF3D7_1214500;size=1237;Alias=2277.t00141,811193,PFL0700w,MAL12P1.140,PF3D7_1214500,12368864,11738814,PFL0700w,Q8I5R1
0.000449418	0.000809717	0.00242915	0.333333	Pf3D7_05_v3	294668	295903	ID=PF3D7_0507100;Name=PF3D7_0507100;description=60S+ribosomal+protein+L4%2C+putative;size=1236;web_id=PF3D7_0507100;locus_tag=PF3D7_0507100;size=1236;Alias=PFE0350c,23504556,812881,PFE0350c,CAD51436.1,MAL5P1.72,XP_001351629.1,124506063,PF3D7_0507100,12368867,ribosomeStruct,Q8I431
0.00164869	0.00081103	0.00324412	0.25	Pf3D7_12_v3	452595	453828	ID=PF3D7_1210000;Name=PF3D7_1210000;description=mitochondrial+ribosomal+protein+L1-2+precursor%2C+putative;size=1234;web_id=PF3D7_1210000;locus_tag=PF3D7_1210000;size=1234;Alias=AAN36189.1,PFL0500w,124805683,PF3D7_1210000,12368867,MAL12P1.100,PFL0500w,ribosomeStruct,11738814,nuclearGenes,2277.t00101,apicoplastgene,Q8I5U9,23496632,XP_001350509.1,811153,12368864
0.000757949	0.000812348	0.000812348	1	Pf3D7_11_v3	588169	589400	ID=PF3D7_1115500;Name=PF3D7_1115500;description=transcription+factor+with+AP2+domain%28s%29%2C+putative+%28ApiAP2%29;size=1232;web_id=PF3D7_1115500;locus_tag=PF3D7_1115500;size=1232;Alias=AAN35747.1,PF11_0163,124803856,PF3D7_1115500,23496086,810710,Q8IIK9,PF11_0163,XP_001347834.1,ApiAP2
0.00111206	0.000812348	0.000812348	1	Pf3D7_05_v3	843586	844817	ID=PF3D7_0520600;Name=PF3D7_0520600;description=BIS%285%27-nucleosyl%29-tetraphosphatase+%28diadenosine+tetraphosphatase%29%2C+putative;size=1232;web_id=PF3D7_0520600;locus_tag=PF3D7_0520600;size=1232;Alias=PFE1035c,Pfal008495AAA,PFE1035c,12368867,CAX63975.1,225631691,296004570,C0H4F3,cat_phosph,PF3D7_0520600,XP_002808704.1,MAL5P1.207,813022
0.00130561	0.00081367	0	Infinity	Pf3D7_08_v3	551199	552428	ID=PF3D7_0810900.1;Name=PF3D7_0810900.1;description=conserved+Plasmodium+protein%2C+unknown+function;size=1230;web_id=PF3D7_0810900.1;locus_tag=PF3D7_0810900.1;size=1230;Alias=PF3D7_0810900.1,124512568,MAL8P1.106,MAL8P1.106,Q8IAU4,XP_001349417.1,23499186,CAD51266.1,2655373
0.00130561	0.00081367	0	Infinity	Pf3D7_08_v3	551199	552428	ID=PF3D7_0810900.2;Name=PF3D7_0810900.2;description=conserved+Plasmodium+protein%2C+unknown+function;size=1230;web_id=PF3D7_0810900.2;locus_tag=PF3D7_0810900.2;size=1230;Alias=PF3D7_0810900.2
0.00025261	0.000815661	0.000815661	1	Pf3D7_08_v3	303370	304596	ID=PF3D7_0805400;Name=PF3D7_0805400;description=acetyltransferase%2C+putative;size=1227;web_id=PF3D7_0805400;locus_tag=PF3D7_0805400;size=1227;Alias=9221952,PF3D7_0805400,225632206,MAL8P1.200,XP_002808814.1,MAL8P1.200,CAX64091.1,pyruvatemetpath,296004941,C0H4R5
0.00024295	0.000816327	0.000408163	2	Pf3D7_12_v3	2180419	2182869	ID=PF3D7_1253400;Name=PF3D7_1253400;description=acyl-CoA+synthetase+%28ACS3%29;size=2451;web_id=PF3D7_1253400;locus_tag=PF3D7_1253400;size=2451;Alias=23497046,PFL2570w,124807131,prenylation,facidsynthesispath,gen_phosph,2277.t00512,811564,MAL12P1.509,XP_001350916.1,ACS3,PFL2570w,Q8I0X2,sphingometpath,AAN36596.1,utilPhospho,PF3D7_1253400,adenylyl,phserine
0.00130672	0.000817661	0.000817661	1	Pf3D7_08_v3	1091998	1093221	ID=PF3D7_0825100;Name=PF3D7_0825100;description=conserved+Plasmodium+protein%2C+unknown+function;size=1224;web_id=PF3D7_0825100;locus_tag=PF3D7_0825100;size=1224;Alias=Q8IB85,XP_001349273.1,2655234,23499042,PF3D7_0825100,124512280,MAL8P1.28,CAD51122.1,MAL8P1.28
0.000923455	0.000819001	0	Infinity	Pf3D7_02_v3	774815	776036	ID=PF3D7_0219400.1;Name=PF3D7_0219400.1;description=ribosome+associated+membrane+protein+RAMP4%2C+putative;size=1222;web_id=PF3D7_0219400.1;locus_tag=PF3D7_0219400.1;size=1222;Alias=812777,Q8I655,9804551,12368864,PFB0888w,254688491,258596935,AAN37617.2,XP_001349695.2,PF3D7_0219400.1
0.000923455	0.000819001	0	Infinity	Pf3D7_02_v3	774815	776036	ID=PF3D7_0219400.2;Name=PF3D7_0219400.2;description=ribosome+associated+membrane+protein+RAMP4%2C+putative;size=1222;web_id=PF3D7_0219400.2;locus_tag=PF3D7_0219400.2;size=1222;Alias=PFB0888w,PF3D7_0219400.2
6.0149e-05	0.000819672	0.000819672	1	Pf3D7_14_v3	983341	984561	ID=PF3D7_1425200;Name=PF3D7_1425200;description=conserved+Plasmodium+protein%2C+unknown+function;size=1221;web_id=PF3D7_1425200;locus_tag=PF3D7_1425200;size=1221;Alias=AAN36845.1,124808778,PF3D7_1425200,XP_001348406.1,PF14_0232,LeuIsoValmetpath,12368864,811814,23497299,Q8ILL1,PF14_0232
0.00343586	0.000819672	0.00204918	0.4	Pf3D7_09_v3	284200	286640	ID=PF3D7_0905700.1;Name=PF3D7_0905700.1;description=autophagy-related+protein+3%2C+putative+%28ATG3%29;size=2441;web_id=PF3D7_0905700.1;locus_tag=PF3D7_0905700.1;size=2441;Alias=ATG3,PF3D7_0905700.1
0.00343586	0.000819672	0.00204918	0.4	Pf3D7_09_v3	284200	286640	ID=PF3D7_0905700.2;Name=PF3D7_0905700.2;description=autophagy-related+protein+3%2C+putative;size=2441;web_id=PF3D7_0905700.2;locus_tag=PF3D7_0905700.2;size=2441;Alias=12368867,813336,296005163,XP_002808915.1,PFI0280c,C0H519,PF3D7_0905700.2,225631799,PFI0280c,CAX64196.1
0.00343586	0.000819672	0.00204918	0.4	Pf3D7_09_v3	284200	286640	ID=PF3D7_0905700.3;Name=PF3D7_0905700.3;description=autophagy-related+protein+3%2C+putative;size=2441;web_id=PF3D7_0905700.3;locus_tag=PF3D7_0905700.3;size=2441;Alias=PF3D7_0905700.3
0.00178337	0.000820345	0.00164069	0.5	Pf3D7_13_v3	1696894	1698113	ID=PF3D7_1343000;Name=PF3D7_1343000;description=phosphoethanolamine+N-methyltransferase+%28PMT%29;size=1220;web_id=PF3D7_1343000;locus_tag=PF3D7_1343000;size=1220;Alias=659452,358439951,AAR08195.1,3UJ9,3UJB,38018254,MAL13P1.214,3UJA,124513590,358439952,MCprot,redoxReg,358439950,methioninemetpath,358439954,CAD52560.1,358439949,phcholine,XP_001350151.1,Pfal004286AAA,813771,PF3D7_1343000,Q8IDQ9,6632…
5.93462e-05	0.000821355	0	Infinity	Pf3D7_14_v3	1081773	1084208	ID=PF3D7_1427500;Name=PF3D7_1427500;description=DNA+mismatch+repair+protein+Msh2p%2C+putative;size=2436;web_id=PF3D7_1427500;locus_tag=PF3D7_1427500;size=2436;Alias=XP_001348428.1,23497322,DNArepair,AAN36867.1,AAO86764.1,DNAgenes,Q8ILI9,PF14_0254,ExcisionRepairTab,811836,12368864,PF3D7_1427500,124808862,29650348,PF14_0254
9.62633e-05	0.00082713	0	Infinity	Pf3D7_09_v3	960181	961390	ID=PF3D7_0923700;Name=PF3D7_0923700;description=conserved+Plasmodium+protein%2C+unknown+function;size=1210;web_id=PF3D7_0923700;locus_tag=PF3D7_0923700;size=1210;Alias=225631836,XP_002808950.1,813513,C0H554,CAX64231.1,PFI1165c,296005237,PF3D7_0923700,12368867,PFI1165c
0.000215083	0.0008285	0.0024855	0.333333	Pf3D7_13_v3	795939	798353	ID=PF3D7_1319300;Name=PF3D7_1319300;description=N2%2CN2-dimethylguanosine+tRNA+methyltransferase%2C+putative;size=2415;web_id=PF3D7_1319300;locus_tag=PF3D7_1319300;size=2415;Alias=814083,PF13_0109,Q8IEC3,apicoplastgene,tRNA_mod,23615346,XP_001349929.1,PF13_0109,PF3D7_1319300,124513146,11738814,CAD52337.1,12368867
0.000564822	0.000829187	0.000829187	1	Pf3D7_14_v3	1375624	1376830	ID=PF3D7_1434400;Name=PF3D7_1434400;description=conserved+Plasmodium+membrane+protein%2C+unknown+function;size=1207;web_id=PF3D7_1434400;locus_tag=PF3D7_1434400;size=1207;Alias=PF3D7_1434400,AAN36938.2,PF14_0325,PF14_0325,12368864,GPI_prots,258597768,Q8ILC0,XP_001348499.2,811907,255528837
0.0031013	0.000829187	0.00165837	0.5	Pf3D7_05_v3	1206473	1207679	ID=PF3D7_0529500;Name=PF3D7_0529500;description=cell+cycle+regulator+protein%2C+putative;size=1207;web_id=PF3D7_0529500;locus_tag=PF3D7_0529500;size=1207;Alias=Q8I3H2,23504875,12368867,PFE1470w,nuclearGenes,813108,XP_001351849.1,PFE1470w,124506503,MAL5P1.292,CAD51656.1,intTranslation,PF3D7_0529500
0.00221916	0.000830565	0.00166113	0.5	Pf3D7_04_v3	930404	931608	ID=PF3D7_0420500;Name=PF3D7_0420500;description=conserved+Plasmodium+protein%2C+unknown+function;size=1205;web_id=PF3D7_0420500;locus_tag=PF3D7_0420500;size=1205;Alias=C0H4B7,9221807,12368867,PFD0993c,PF3D7_0420500,PFD0993c
0.00102454	0.000831947	0	Infinity	Pf3D7_08_v3	546163	547365	ID=PF3D7_0810700;Name=PF3D7_0810700;description=conserved+Plasmodium+protein%2C+unknown+function;size=1203;web_id=PF3D7_0810700;locus_tag=PF3D7_0810700;size=1203;Alias=C0H4T8,PF3D7_0810700,2655374,MAL8P1.107,MAL8P1.107
0.000256096	0.000831947	0.000831947	1	Pf3D7_04_v3	195543	196745	ID=PF3D7_0403500;Name=PF3D7_0403500;description=ubiquitin+specific+protease%2C+putative;size=1203;web_id=PF3D7_0403500;locus_tag=PF3D7_0403500;size=1203;Alias=812487,Q8I1Z5,12368867,23498154,PFD0165w,124505209,MAL4P1.33,proteases,CAD49126.1,PF3D7_0403500,XP_001351346.1,PFD0165w,proteaUbiqpath,proteasome_new
0.000153787	0.000831947	0.00249584	0.333333	Pf3D7_13_v3	750316	751518	ID=PF3D7_1318200;Name=PF3D7_1318200;description=apicoplast+glycerol-3-phosphate+acyltransferase%2C+putative;size=1203;web_id=PF3D7_1318200;locus_tag=PF3D7_1318200;size=1203;Alias=apicoplastgene,Q8IED4,PF13_0100,814076,11738814,XP_001349918.1,12368867,phserine,124513124,utilPhospho,CAD52326.1,PF13_0100,PF3D7_1318200,23615335,facidsynthesispath
0.00104587	0.000832639	0	Infinity	Pf3D7_11_v3	204593	205794	ID=PF3D7_1104700.1;Name=PF3D7_1104700.1;description=RNA+polymerase+subunit%2C+putative;size=1202;web_id=PF3D7_1104700.1;locus_tag=PF3D7_1104700.1;size=1202;Alias=RNApolyIII,PF11_0058,Q8IIV5,PF11_0058,258597195,254832590,RNApolyStruct,12368864,AAN35647.2,XP_001347734.2,810610,PF3D7_1104700.1
0.00104587	0.000832639	0	Infinity	Pf3D7_11_v3	204593	205794	ID=PF3D7_1104700.2;Name=PF3D7_1104700.2;description=RNA+polymerase+subunit%2C+putative;size=1202;web_id=PF3D7_1104700.2;locus_tag=PF3D7_1104700.2;size=1202;Alias=PF3D7_1104700.2
0.00076797	0.000832871	0.00111049	0.75	Pf3D7_08_v3	658493	662095	ID=PF3D7_0813400;Name=PF3D7_0813400;description=conserved+Plasmodium+protein%2C+unknown+function;size=3603;web_id=PF3D7_0813400;locus_tag=PF3D7_0813400;size=3603;Alias=PF08_0081,225632239,MAL8P1.94,C0H4U5,CAX64121.1,2655280,PF08_0081,PF3D7_0813400,296005007,XP_002808844.1
0.00082197	0.000833333	0.00166667	0.5	Pf3D7_14_v3	1702609	1703809	ID=PF3D7_1441800;Name=PF3D7_1441800;description=SNF7+family+protein%2C+putative;size=1201;web_id=PF3D7_1441800;locus_tag=PF3D7_1441800;size=1201;Alias=PF14_0397,PF14_0397,XP_001348571.2,AAN37010.2,258597806,largeTethering,Q8IL52.2,811979,PF3D7_1441800,255528856,12368864,Q8IL52,347595766
9.31244e-05	0.000835422	0.000835422	1	Pf3D7_01_v3	371815	373012	ID=PF3D7_0109300;Name=PF3D7_0109300;description=fatty+acid+elongation+protein%2C+GNS1%2FSUR4+family%2C+putative;size=1198;web_id=PF3D7_0109300;locus_tag=PF3D7_0109300;size=1198;Alias=23510666,PFA0455c,124505819,MAL1P2.20,CAD49051.1,gen_phosph,PF3D7_0109300,XP_001351023.1,PFA0455c,sphingometpath,facidsynthesispath
0.000564172	0.000835422	0.000835422	1	Pf3D7_09_v3	420485	421682	ID=PF3D7_0909300;Name=PF3D7_0909300;description=apoptosis-related+protein%2C+putative+%28ARP%29;size=1198;web_id=PF3D7_0909300;locus_tag=PF3D7_0909300;size=1198;Alias=XP_001351965.2,PFI0450c,ARP,apoptosis,PFI0450c,225631810,CAD51776.2,296005185,Q8I359,PF3D7_0909300,813370
0.000123099	0.000837521	0	Infinity	Pf3D7_11_v3	1340486	1341680	ID=PF3D7_1134400;Name=PF3D7_1134400;description=conserved+Plasmodium+protein%2C+unknown+function;size=1195;web_id=PF3D7_1134400;locus_tag=PF3D7_1134400;size=1195;Alias=254832679,AAN35939.2,PF11_0355,810902,258597353,XP_001348026.2,PF11_0355,PF3D7_1134400,Q8II20,12368864
0.00042651	0.000838223	0.00167645	0.5	Pf3D7_13_v3	1215925	1217118	ID=PF3D7_1328900;Name=PF3D7_1328900;description=conserved+Plasmodium+protein%2C+unknown+function;size=1194;web_id=PF3D7_1328900;locus_tag=PF3D7_1328900;size=1194;Alias=PF13_0151,124513308,PF13_0151,814121,CAD52418.1,23615427,PF3D7_1328900,XP_001350010.1,Q8IE48
0.000888271	0.000840336	0.000840336	1	Pf3D7_13_v3	982611	983801	ID=PF3D7_1323700;Name=PF3D7_1323700;description=glideosome+associated+protein+with+multiple+membrane+spans+1+%28GAPM1%29;size=1191;web_id=PF3D7_1323700;locus_tag=PF3D7_1323700;size=1191;Alias=MAL13P1.130,XP_001349977.1,linearMotor,23615394,813681,Q8IE80,GAPM1,MAL13P1.130,12368867,124513242,CAD52385.1,PF3D7_1323700
0.00205871	0.000841043	0.000420521	2	Pf3D7_10_v3	811106	813484	ID=PF3D7_1020000;Name=PF3D7_1020000;description=large+subunit+rRNA+processing+RRM+protein%2C+putative;size=2379;web_id=PF3D7_1020000;locus_tag=PF3D7_1020000;size=2379;Alias=AAN35392.1,PF10_0194,Ribosomegenes,Q8IJK1,810352,12368864,PF3D7_1020000,PF10_0194,124802467,23495060,XP_001347479.1
0.000533283	0.000847817	0.00127173	0.666667	Pf3D7_06_v3	770147	772506	ID=PF3D7_0618400;Name=PF3D7_0618400;description=conserved+Plasmodium+membrane+protein%2C+unknown+function;size=2360;web_id=PF3D7_0618400;locus_tag=PF3D7_0618400;size=2360;Alias=PFF0890c,2270.t00072,PF3D7_0618400,PFF0890c,CAG24999.2,12368867,3885803,296004684,XP_966169.2,C6KT24,225631748,MAL6P1.243
0.000609027	0.000848896	0.00169779	0.5	Pf3D7_03_v3	674458	675636	ID=PF3D7_0316700;Name=PF3D7_0316700;description=HVA22%2FTB2%2FDP1+family+protein%2C+putative;size=1179;web_id=PF3D7_0316700;locus_tag=PF3D7_0316700;size=1179;Alias=814481,O77388,3758859,10448855,12368867,MAL3P6.7,PFC0730w,124504991,CAB11144.1,nuclearGenes,PF3D7_0316700,XP_001351237.1,PFC0730w
9.36224e-05	0.000851064	0	Infinity	Pf3D7_06_v3	470049	471224	ID=PF3D7_0611300;Name=PF3D7_0611300;description=conserved+Plasmodium+protein%2C+unknown+function;size=1176;web_id=PF3D7_0611300;locus_tag=PF3D7_0611300;size=1176;Alias=12368867,CAG25354.1,86170874,2270.t00448,C6KSV8,MAL6P1.115,46361067,3885955,PFF0555w,XP_966102.1,PF3D7_0611300,PFF0555w
0.00084112	0.000851064	0	Infinity	Pf3D7_14_v3	2334787	2335962	ID=PF3D7_1456900;Name=PF3D7_1456900;description=conserved+protein%2C+unknown+function;size=1176;web_id=PF3D7_1456900;locus_tag=PF3D7_1456900;size=1176;Alias=PF3D7_1456900,PF14_0542,XP_001348716.2,812124,12368864,255528895,PF14_0542,258597870,Q8IKR0,AAN37155.2
0.000290166	0.000855432	0.0025663	0.333333	Pf3D7_08_v3	772568	773737	ID=PF3D7_0817000;Name=PF3D7_0817000;description=ubiquitin-activating+enzyme%2C+putative;size=1170;web_id=PF3D7_0817000;locus_tag=PF3D7_0817000;size=1170;Alias=CAX64128.1,MAL8P1.75,XP_002808851.1,gen_phosph,225632247,296005025,MAL8P1.75,SCF,PF3D7_0817000,proteasome_new,C0H4V1,proteaUbiqpath,complex_ubiquitin_ligase,chaperone,2655425
0.00126323	0.000856898	0	Infinity	Pf3D7_05_v3	759831	760998	ID=PF3D7_0518300;Name=PF3D7_0518300;description=proteasome+subunit+beta+type+1%2C+putative;size=1168;web_id=PF3D7_0518300;locus_tag=PF3D7_0518300;size=1168;Alias=PFE0915c,812998,CAX63970.1,XP_002808699.1,proteaUbiqpath,MAL5P1.183,PF3D7_0518300,proteasome_new,225631686,C0H4E8,proteases,12368867,PFE0915c,296004560
0.00241377	0.000860585	0.000860585	1	Pf3D7_14_v3	2877586	2878748	ID=PF3D7_1470200;Name=PF3D7_1470200;description=conserved+Plasmodium+protein%2C+unknown+function;size=1163;web_id=PF3D7_1470200;locus_tag=PF3D7_1470200;size=1163;Alias=258597927,812251,255528930,XP_001348843.2,AAN37282.2,PF14_0669,Q8IKD6,PF3D7_1470200,12368864,PF14_0669
0.000238851	0.000861574	0.0031591	0.272727	Pf3D7_14_v3	313975	317457	ID=PF3D7_1408400;Name=PF3D7_1408400;description=DNA-repair+helicase%2C+putative;size=3483;web_id=PF3D7_1408400;locus_tag=PF3D7_1408400;size=3483;Alias=811663,12368864,Q8IM12,XP_001348254.1,dsbRecomb,PF14_0081,PF3D7_1408400,ExcisionRepairTab,baseExcision,23497145,124808195,PF14_0081,AAN36693.1,DNAgenes
0.00129216	0.000861698	0.000430849	2	Pf3D7_14_v3	2167219	2169540	ID=PF3D7_1452700;Name=PF3D7_1452700;description=U1+snRNA+associated+protein%2C+putative;size=2322;web_id=PF3D7_1452700;locus_tag=PF3D7_1452700;size=2322;Alias=Q8IKU9,PF14_0502,PF3D7_1452700,AAN37115.2,PF14_0502,XP_001348676.2,258597848,splicing,12368864,255528882,812084
3.16301e-05	0.000862069	0	Infinity	Pf3D7_13_v3	1486456	1487616	ID=PF3D7_1336800;Name=PF3D7_1336800;description=nuclear+movement+protein%2C+putative;size=1161;web_id=PF3D7_1336800;locus_tag=PF3D7_1336800;size=1161;Alias=PF13_0204,XP_001350096.1,PF13_0204,814173,microtubuleDynam,124513480,PF3D7_1336800,CAD52505.1,Q8IDW4,23615513
0.0013312	0.000865426	0.00129814	0.666667	Pf3D7_14_v3	2482775	2485086	ID=PF3D7_1461000;Name=PF3D7_1461000;description=conserved+Plasmodium+protein%2C+unknown+function;size=2312;web_id=PF3D7_1461000;locus_tag=PF3D7_1461000;size=2312;Alias=23497655,Q8IKM2,AAN37195.1,124810087,PF14_0582,12368864,PF3D7_1461000,812164,XP_001348756.1,PF14_0582
0.000838294	0.000865614	0.00151482	0.571429	Pf3D7_12_v3	1452606	1457227	ID=PF3D7_1234800;Name=PF3D7_1234800;description=Splicing+factor+3B+subunit+3%2C+putative+%28SF3B3%29;size=4622;web_id=PF3D7_1234800;locus_tag=PF3D7_1234800;size=4622;Alias=Q8I574,811388,124806507,PF3D7_1234800,PFL1680w,PFL1680w,2277.t00336,splicing,SF3B3,12368864,23496869,12368867,AAN36422.1,MAL12P1.335,XP_001350742.1
0.00010641	0.000866551	0	Infinity	Pf3D7_12_v3	1439896	1441050	ID=PF3D7_1234500;Name=PF3D7_1234500;description=conserved+Plasmodium+protein%2C+unknown+function;size=1155;web_id=PF3D7_1234500;locus_tag=PF3D7_1234500;size=1155;Alias=PF3D7_1234500,PFL1665c,AAN36419.1,XP_001350739.1,Q8I577,12368864,MAL12P1.332,124806496,PFL1665c,Pfal002549AAA,811385,23496866,2277.t00333
0.00234241	0.000867303	0.00173461	0.5	Pf3D7_05_v3	256225	257378	ID=PF3D7_0506000;Name=PF3D7_0506000;description=conserved+Plasmodium+protein%2C+unknown+function;size=1154;web_id=PF3D7_0506000;locus_tag=PF3D7_0506000;size=1154;Alias=23504545,12368867,PFE0295w,124506041,MAL5P1.60,PF3D7_0506000,CAD51425.1,PFE0295w,XP_001351618.1,813070,Q8I442
0.000228395	0.00086881	0	Infinity	Pf3D7_12_v3	1278460	1279611	ID=PF3D7_1231200;Name=PF3D7_1231200;description=conserved+Plasmodium+protein%2C+unknown+function;size=1152;web_id=PF3D7_1231200;locus_tag=PF3D7_1231200;size=1152;Alias=XP_001350707.1,2277.t00301,AAN36387.1,124806382,PFL1505c,MAL12P1.301,PFL1505c,12368864,811353,Q8I5A8,PF3D7_1231200,23496834
0.00130666	0.00086881	0.00347524	0.25	Pf3D7_04_v3	855898	857049	ID=PF3D7_0419300;Name=PF3D7_0419300;description=conserved+Plasmodium+protein%2C+unknown+function;size=1152;web_id=PF3D7_0419300;locus_tag=PF3D7_0419300;size=1152;Alias=812493,Q8I1P4,12368867,23498259,PFD0935c,124505519,CAD49230.1,MAL4P1.182,PF3D7_0419300,XP_001351501.1,PFD0935c
0.000273164	0.00087108	0	Infinity	Pf3D7_10_v3	939938	942234	ID=PF3D7_1022400;Name=PF3D7_1022400;description=pre-mRNA+splicing+factor%2C+putative;size=2297;web_id=PF3D7_1022400;locus_tag=PF3D7_1022400;size=2297;Alias=PF10_0217,810374,splicing,124802534,Q8IJI0,12368867,12368864,PF10_0217,23495082,AAN35414.1,XP_001347501.1,PF3D7_1022400
0.000125878	0.00087108	0.00087108	1	Pf3D7_14_v3	363092	364240	ID=PF3D7_1409300;Name=PF3D7_1409300;description=DNA-damage+inducible+protein%2C+putative;size=1149;web_id=PF3D7_1409300;locus_tag=PF3D7_1409300;size=1149;Alias=811671,AAN36702.1,PF3D7_1409300,12368864,PF14_0090,23497154,Q8IM03,XP_001348263.1,PF14_0090,124808229,proteasome_new
0.000567915	0.00087108	0.00130662	0.666667	Pf3D7_12_v3	222695	224991	ID=PF3D7_1205100;Name=PF3D7_1205100;description=UGA+suppressor+tRNA-associated+antigenic+protein%2C+putative;size=2297;web_id=PF3D7_1205100;locus_tag=PF3D7_1205100;size=2297;Alias=811104,12368864,2277.t00052,23496582,selenocysteine,AAN36140.1,Q8I5Z4,PFL0255c,XP_001350460.1,PF3D7_1205100,PFL0255c,MAL12P1.51,124805510
0.000870861	0.000872981	0.00261894	0.333333	Pf3D7_09_v3	737985	740276	ID=PF3D7_0917900;Name=PF3D7_0917900;description=heat+shock+protein+70+%28Hsp70-2%29;size=2292;web_id=PF3D7_0917900;locus_tag=PF3D7_0917900;size=2292;Alias=protER,CAD51861.1,PF3D7_0917900,XP_001352050.1,Hsp70-2,12368867,MCprot,Pf_chaperones,PFI0875w,eukaryotes,124506906,Q8I2X4,chapfold,ProteasomeMeditated,redoxReg,813455,23505079,PFI0875w
0.000557711	0.000874508	0.000437254	2	Pf3D7_01_v3	450831	453118	ID=PF3D7_0112000;Name=PF3D7_0112000;description=TatD-like+deoxyribonuclease%2C+putative;size=2288;web_id=PF3D7_0112000;locus_tag=PF3D7_0112000;size=2288;Alias=PFA0580c,MAL1P3.01,nuclearGenes,PF3D7_0112000,apicoplastgene,PFA0580c
3.33521e-05	0.000875657	0	Infinity	Pf3D7_06_v3	1199853	1200995	ID=PF3D7_0629200;Name=PF3D7_0629200;description=DnaJ+protein%2C+putative;size=1143;web_id=PF3D7_0629200;locus_tag=PF3D7_0629200;size=1143;Alias=eukaryotes,PFF1415c,CAG25104.1,PF3D7_0629200,46361243,MAL6P1.136,12368867,2270.t00180,chapfold,PFF1415c,86171763,XP_966274.1,3885732,C6KTC7,Pf_chaperones
0.00127336	0.000877963	0	Infinity	Pf3D7_03_v3	544055	545194	ID=PF3D7_0313300;Name=PF3D7_0313300;description=apicoplast+conserved+ycf19+protein+precursor%2C+unknown+function;size=1140;web_id=PF3D7_0313300;locus_tag=PF3D7_0313300;size=1140;Alias=C0H470,9221777,10448855,12368867,PFC0556c,225685552,296004350,CAX64429.1,PF3D7_0313300,XP_002808620.1,PFC0556c
0.00045284	0.000877963	0.000585309	1.5	Pf3D7_11_v3	636094	639511	ID=PF3D7_1116800;Name=PF3D7_1116800;description=heat+shock+protein+101+%28HSP101%29;size=3418;web_id=PF3D7_1116800;locus_tag=PF3D7_1116800;size=3418;Alias=23496098,AAN35759.1,PF3D7_1116800,XP_001347846.1,810722,12368864,PF11_0175,11738814,HSP101,Pf_chaperones,124803903,PF11_0175,12368867,Q8IIJ8,apicoplastgene
0.000787106	0.000880282	0	Infinity	Pf3D7_14_v3	906620	908892	ID=PF3D7_1422500;Name=PF3D7_1422500;description=ubiquitin+ligase%2C+putative+%28HRD1%29;size=2273;web_id=PF3D7_1422500;locus_tag=PF3D7_1422500;size=2273;Alias=811797,255528805,ProteasomeMeditated,HRD1,Q8ILM8,AAN36828.2,PF14_0215,PF14_0215,12368864,PF3D7_1422500,258597712,XP_001348389.2
0.000225084	0.000882223	0.000882223	1	Pf3D7_06_v3	217240	219507	ID=PF3D7_0605100;Name=PF3D7_0605100;description=RNA+binding+protein%2C+putative;size=2268;web_id=PF3D7_0605100;locus_tag=PF3D7_0605100;size=2268;Alias=86170571,PFF0250w,CAG25221.1,3885713,46362283,XP_966041.1,C6KSP9,PF3D7_0605100,2270.t00262,PFF0250w,MAL6P1.54,12368867
6.49396e-05	0.000884956	0.000884956	1	M76611	3492	4622	ID=mal_mito_3;Name=mal_mito_3;description=apocytochrome+b+%28cyb%29;size=1131;web_id=mal_mito_3;locus_tag=mal_mito_3;size=1131;Alias=AAP58090.1,AAP58099.1,NP_059668.1,31789865,Q02768.1,AAP57985.1,AAP57991.1,AAP57997.1,AAP58006.1,AAP58036.1,AAP58066.1,AAP58087.1,AAP58132.1,AAP58138.1,AAP58153.1,AAP58186.1,AAP58231.1,mal_mito_3,mitochondrionef,cyb,31789553,31789649,31789677,AAP58000.1,AAP58015.1,AA…
6.49396e-05	0.000884956	0.000884956	1	Pf3D7_12_v3	1920784	1921914	ID=PF3D7_1246200;Name=PF3D7_1246200;description=actin+I+%28ACT1%29;size=1131;web_id=PF3D7_1246200;locus_tag=PF3D7_1246200;size=1131;Alias=linearMotor,P86287.1,23496976,redoxReg,811495,chrom_remod,MAL12P1.442,124806845,PF3D7_1246200,Q8I4X0,actin,ACT1,PFL2215w,239977063,74929507,XP_001350847.1,2277.t00443,PFL2215w,AAN36527.1,Q8I4X0.1
0.000669191	0.000884956	0.00110619	0.8	Pf3D7_06_v3	402722	407242	ID=PF3D7_0609500;Name=PF3D7_0609500;description=conserved+Plasmodium+protein%2C+unknown+function;size=4521;web_id=PF3D7_0609500;locus_tag=PF3D7_0609500;size=4521;Alias=3885938,PFF0470w,MAL6P198a,12368867,MAL6P1.98,MAL6P1.98a,PFF0470w,C6KSU2,PF3D7_0609500
0.000353864	0.000886132	0.0026584	0.333333	Pf3D7_06_v3	674118	676375	ID=PF3D7_0616200;Name=PF3D7_0616200;description=Ndc80+homologue%2C+putative;size=2258;web_id=PF3D7_0616200;locus_tag=PF3D7_0616200;size=2258;Alias=12368867,PFF0785w,XP_966148.1,46361113,organizKinetochore,MAL6P1.264,86171107,Kinetochore,3885899,PF3D7_0616200,CAG25400.1,PFF0785w,C6KT03,2270.t00050
0.000473696	0.000888494	0.00266548	0.333333	Pf3D7_03_v3	988631	990882	ID=PF3D7_0323600;Name=PF3D7_0323600;description=conserved+Plasmodium+protein%2C+unknown+function;size=2252;web_id=PF3D7_0323600;locus_tag=PF3D7_0323600;size=2252;Alias=814551,O97305,10448855,12368867,PFC1055w,MAL3P7.42,PF3D7_0323600,PFC1055w
0.000280238	0.00088968	0.00266904	0.333333	Pf3D7_03_v3	743929	745053	ID=PF3D7_0318100;Name=PF3D7_0318100;description=band+7-related+protein;size=1125;web_id=PF3D7_0318100;locus_tag=PF3D7_0318100;size=1125;Alias=814495,O77376,3758847,10448855,12368867,PFC0800w,124505019,MAL3P6.19,CAB11132.1,nuclearGenes,PF3D7_0318100,XP_001351251.1,PFC0800w
0.000971511	0.000891266	0.0026738	0.333333	Pf3D7_07_v3	1021508	1022630	ID=PF3D7_0724300;Name=PF3D7_0724300;description=3-demethylubiquinone-9+3-methyltransferase%2C+putative;size=1123;web_id=PF3D7_0724300;locus_tag=PF3D7_0724300;size=1123;Alias=PF3D7_0724300,124512024,23498913,12368867,2655154,CAD50991.1,Q8IBK9,MAL7P1.130,XP_001349145.1,ubiquinonemetpath,MAL7P1.130,nuclearGenes
0.00154365	0.000892061	0.00267618	0.333333	Pf3D7_07_v3	1162710	1163831	ID=PF3D7_0727400;Name=PF3D7_0727400;description=proteasome+subunit+alpha+type+5%2C+putative;size=1122;web_id=PF3D7_0727400;locus_tag=PF3D7_0727400;size=1122;Alias=Q8IBI3,proteases,PF07_0112,proteaUbiqpath,12368867,XP_001349171.1,PF07_0112,proteasome_new,2655165,23498939,CAD51017.1,PF3D7_0727400,124512076
0.00180281	0.000892857	0	Infinity	Pf3D7_07_v3	290100	291220	ID=PF3D7_0705900;Name=PF3D7_0705900;description=ATP+synthase+subunit+C%2C+putative;size=1121;web_id=PF3D7_0705900;locus_tag=PF3D7_0705900;size=1121;Alias=mitochonApico,CAX64030.1,PF3D7_0705900,225632141,9221895,296004810,XP_002808757.1,MAL7P1.340,MAL7P1.340,C0H4L0,nuclearGenes
0.000920622	0.000892857	0.00357143	0.25	Pf3D7_09_v3	1338175	1339295	ID=PF3D7_0933900;Name=PF3D7_0933900;description=conserved+Plasmodium+protein%2C+unknown+function;size=1121;web_id=PF3D7_0933900;locus_tag=PF3D7_0933900;size=1121;Alias=124507215,12368867,Q8I2H9,PFI1640c,813608,23505234,PFI1640c,CAD52014.1,PF3D7_0933900,XP_001352204.1
0.000945444	0.000894454	0.000894454	1	Pf3D7_06_v3	1101734	1102852	ID=PF3D7_0627500;Name=PF3D7_0627500;description=4-methyl-5%28B-hydroxyethyl%29-thiazol+monophosphate+biosynthesis+enzyme;size=1119;web_id=PF3D7_0627500;locus_tag=PF3D7_0627500;size=1119;Alias=PF3D7_0627500,PFF1335c,C6KTB1,46361227,3885695,PFF1335c,XP_966258.1,MAL6P1.153,CAG25088.1,proteases,2270.t00162,12368867,86171677,thiaminemetpath
0.00219502	0.000894454	0.000894454	1	Pf3D7_14_v3	867802	868920	ID=PF3D7_1421000;Name=PF3D7_1421000;description=conserved+Plasmodium+protein%2C+unknown+function;size=1119;web_id=PF3D7_1421000;locus_tag=PF3D7_1421000;size=1119;Alias=AAN36816.1,XP_001348377.1,PF3D7_1421000,Q8ILP0,124808667,811785,PF14_0775,12368864,PF14_0775,23497270
9.8455e-05	0.000894454	0.00178891	0.5	Pf3D7_07_v3	243898	245016	ID=PF3D7_0704900;Name=PF3D7_0704900;description=peptide+chain+release+factor%2C+putative;size=1119;web_id=PF3D7_0704900;locus_tag=PF3D7_0704900;size=1119;Alias=nuclearGenes,MAL7P1.20,Q8IC21,proteinBiosynth,MAL7P1.20,11738814,apicoplastgene,2655192,PF3D7_0704900
0.00235876	0.000898473	0	Infinity	Pf3D7_07_v3	1216088	1217201	ID=PF3D7_0728500;Name=PF3D7_0728500;description=conserved+Plasmodium+protein%2C+unknown+function;size=1114;web_id=PF3D7_0728500;locus_tag=PF3D7_0728500;size=1114;Alias=9221873,296004897,PF3D7_0728500,CAX64068.1,XP_002808795.1,MAL7P1.154a,225632184,C0H4P8,MAL7P1.154a
0.000544737	0.000898473	0.000898473	1	Pf3D7_04_v3	718202	722654	ID=PF3D7_0416400;Name=PF3D7_0416400;description=histone+acetyltransferase%2C+putative+%28HAT1%29;size=4453;web_id=PF3D7_0416400;locus_tag=PF3D7_0416400;size=4453;Alias=HAT1,812538,C0H4A7,Histone,12368867,PFD0795w,225631639,296004426,hist_chap,CAX63925.1,MAL4P1.154,chrom_lands,PF3D7_0416400,XP_002808655.1,PFD0795w,chrom_mod_prot,histone_chaperone
0.000358932	0.000900901	0	Infinity	Pf3D7_07_v3	1191179	1192289	ID=PF3D7_0728000;Name=PF3D7_0728000;description=eukaryotic+translation+initiation+factor+2+alpha+subunit%2C+putative;size=1111;web_id=PF3D7_0728000;locus_tag=PF3D7_0728000;size=1111;Alias=2655170,Q8IBH7,PF3D7_0728000,PF07_0117,23498945,CAD51023.1,intTranslation,XP_001349177.1,12368867,PF07_0117,124512088
0.000646664	0.000903751	0.000451875	2	Pf3D7_12_v3	480593	482806	ID=PF3D7_1210900;Name=PF3D7_1210900;description=GPI+mannosyltransferase+I+%28PIG-M%29;size=2214;web_id=PF3D7_1210900;locus_tag=PF3D7_1210900;size=2214;Alias=2277.t00109,254945360,PFL0540w,AAN36197.2,gpiAnchor1path,BAF58166.1,XP_001350517.2,Q8I5U1,PIG-M,MAL12P1.108,146272409,PFL0540w,PF3D7_1210900,811161,258597470
0.000100066	0.000909091	0.00181818	0.5	Pf3D7_11_v3	1290501	1291601	ID=PF3D7_1133300;Name=PF3D7_1133300;description=conserved+Plasmodium+protein%2C+unknown+function;size=1101;web_id=PF3D7_1133300;locus_tag=PF3D7_1133300;size=1101;Alias=124804475,PF11_0343,Q8II31,23496269,810890,PF11_0343,PF3D7_1133300,AAN35927.1,XP_001348014.1,12368864
0.000307924	0.000909091	0.00181818	0.5	Pf3D7_14_v3	1168236	1169336	ID=PF3D7_1429700;Name=PF3D7_1429700;description=mitochondrial+ribosomal+protein+L15+precursor%2C+putative;size=1101;web_id=PF3D7_1429700;locus_tag=PF3D7_1429700;size=1101;Alias=PF14_0276,XP_001348450.1,PF3D7_1429700,Q8ILG7,811858,12368867,124808949,AAN36889.1,ribosomeStruct,nuclearGenes,12368864,PF14_0276,23497344
0.000514325	0.000909918	0.000454959	2	Pf3D7_03_v3	78195	80393	ID=PF3D7_0301200;Name=PF3D7_0301200;description=serine%2Fthreonine+protein+kinase%2C+FIKK+family+%28FIKK3%29;size=2199;web_id=PF3D7_0301200;locus_tag=PF3D7_0301200;size=2199;Alias=FIKK3,C0H466,9221788,PFC0060c,225685546,296004338,MAL3P8.10,CAX64425.1,PF3D7_0301200,XP_002808616.1,PFC0060c,Protein_kinases,phosphorylation
0.00196184	0.000910747	0.000910747	1	Pf3D7_04_v3	456922	458020	ID=PF3D7_0409700;Name=PF3D7_0409700;description=peptide+chain+release+factor+2%2C+putative;size=1099;web_id=PF3D7_0409700;locus_tag=PF3D7_0409700;size=1099;Alias=812393,Q8I1W0,11738814,12368867,23498192,PFD0480w,124505341,MAL4P2.33,CAD49163.1,PF3D7_0409700,XP_001351412.1,PFD0480w,proteinBiosynth
3.34466e-05	0.000911577	0	Infinity	Pf3D7_02_v3	533253	534350	ID=PF3D7_0212900;Name=PF3D7_0212900;description=Leu%2FPhe-tRNA+protein+transferase%2C+putative;size=1098;web_id=PF3D7_0212900;locus_tag=PF3D7_0212900;size=1098;Alias=812717,O96210,3845223,9804551,12368864,PFB0585w,108752024,124801217,PF02_0121,AAC71906.1,ABG02898.1,PF3D7_0212900,XP_001349635.1,PFB0585w,LeuIsoValmetpath,phenylTyrmetpath
0.000989218	0.000911577	0.00182315	0.5	Pf3D7_07_v3	956920	958017	ID=PF3D7_0722500;Name=PF3D7_0722500;description=cell+cycle+control+protein+cwf15%2C+putative;size=1098;web_id=PF3D7_0722500;locus_tag=PF3D7_0722500;size=1098;Alias=124511986,PF3D7_0722500,12368867,XP_001349126.1,PF07_0091,2655135,23498894,PF07_0091,CAD50972.1,splicing,Q8IBM8
7.64189e-05	0.000912201	0.000912201	1	Pf3D7_14_v3	2650755	2655140	ID=PF3D7_1465500;Name=PF3D7_1465500;description=potassium+channel+protein+%28K2%29;size=4386;web_id=PF3D7_1465500;locus_tag=PF3D7_1465500;size=4386;Alias=K2,transporters,Q8IKI3,PF14_0622,AAN37235.2,255528915,258597901,812204,PPM,XP_001348796.2,PF14_0622,12368864,PF3D7_1465500
0.000118595	0.00091617	0.00229043	0.4	Pf3D7_12_v3	308214	310397	ID=PF3D7_1206800;Name=PF3D7_1206800;description=conserved+Plasmodium+protein%2C+unknown+function;size=2184;web_id=PF3D7_1206800;locus_tag=PF3D7_1206800;size=2184;Alias=23496600,811121,2277.t00069,XP_001350477.1,MAL12P1.68,PFL0340w,Q8I5X7,AAN36157.1,124805569,PFL0340w,PF3D7_1206800,12368864
0.000147039	0.000921093	0.00122812	0.75	Pf3D7_13_v3	501790	505047	ID=PF3D7_1311800;Name=PF3D7_1311800;description=M1-family+alanyl+aminopeptidase+%28M1AAP%29;size=3258;web_id=PF3D7_1311800;locus_tag=PF3D7_1311800;size=3258;Alias=124512980,hemoglobinpolpath,11738814,23615263,9879894,MAL13P1.56,CAA70301.2,MAL13P1.56,PF3D7_1311800,24744851,O96935.2,nuclearGenes,813945,20591164,M1AAP,Q8IEK1,20133789,CAD52253.1,31340516,XP_001349846.1,proteases,apicoplastgene
3.51042e-05	0.000921659	0	Infinity	Pf3D7_11_v3	846929	848014	ID=PF3D7_1122300;Name=PF3D7_1122300;description=conserved+Plasmodium+protein%2C+unknown+function;size=1086;web_id=PF3D7_1122300;locus_tag=PF3D7_1122300;size=1086;Alias=PF3D7_1122300,11738814,12368864,258597300,810778,AAN35815.2,PF11_0231,PF11_0231,Q8IIE3,254832651,XP_001347902.2
0.00126647	0.000923361	0	Infinity	Pf3D7_05_v3	257748	258831	ID=PF3D7_0506100;Name=PF3D7_0506100;description=60S+ribosomal+subunit+protein+L24-2%2C+putative;size=1084;web_id=PF3D7_0506100;locus_tag=PF3D7_0506100;size=1084;Alias=Q8I441,PFE0300c,ribosomeStruct,riboMaturation,CAD51426.1,PF3D7_0506100,124506043,MAL5P1.61,12368867,Ribosomegenes,812901,23504546,XP_001351619.1,PFE0300c
0.000134361	0.000924214	0.00184843	0.5	Pf3D7_13_v3	415916	416998	ID=PF3D7_1309000;Name=PF3D7_1309000;description=conserved+Plasmodium+protein%2C+unknown+function;size=1083;web_id=PF3D7_1309000;locus_tag=PF3D7_1309000;size=1083;Alias=XP_001349818.1,CAD52225.1,813932,Q8IEM4,23615235,PF3D7_1309000,124512924,MAL13P1.43,MAL13P1.43
0.000473371	0.000924214	0.00184843	0.5	Pf3D7_03_v3	644186	645268	ID=PF3D7_0315900;Name=PF3D7_0315900;description=conserved+Plasmodium+protein%2C+unknown+function;size=1083;web_id=PF3D7_0315900;locus_tag=PF3D7_0315900;size=1083;Alias=814473,O97274,10448855,12368867,23477020,PFC0695w,124504975,MAL3P5.23,CAB38985.3,PF3D7_0315900,XP_001351229.1,PFC0695w
0.000319262	0.000924214	0.00277264	0.333333	Pf3D7_06_v3	482825	483907	ID=PF3D7_0611500;Name=PF3D7_0611500;description=conserved+Plasmodium+protein%2C+unknown+function;size=1083;web_id=PF3D7_0611500;locus_tag=PF3D7_0611500;size=1083;Alias=3885957,12368867,46361069,PFF0565c,PFF0565c,MAL6P1.309,XP_966104.1,CAG25356.1,PF3D7_0611500,C6KSW0,86170884,2270.t00010
0.000860239	0.000926569	0.000926569	1	Pf3D7_13_v3	801712	806029	ID=PF3D7_1319400;Name=PF3D7_1319400;description=conserved+Plasmodium+protein%2C+unknown+function;size=4318;web_id=PF3D7_1319400;locus_tag=PF3D7_1319400;size=4318;Alias=MAL13P1.103,MAL13P1.103,23615347,813652,PF3D7_1319400,CAD52338.1,Q8IEC2,124513148,XP_001349930.1
0.000412437	0.000927357	0	Infinity	Pf3D7_11_v3	849335	852570	ID=PF3D7_1122400;Name=PF3D7_1122400;description=conserved+Plasmodium+protein%2C+unknown+function;size=3236;web_id=PF3D7_1122400;locus_tag=PF3D7_1122400;size=3236;Alias=Q8IIE2,AAN35816.1,23496156,PF11_0232,124804103,12368864,810779,PF11_0232,PF3D7_1122400,XP_001347903.1
0.00117215	0.000927644	0.000463822	2	Pf3D7_12_v3	351850	354006	ID=PF3D7_1207700;Name=PF3D7_1207700;description=blood+stage+antigen+41-3+precursor;size=2157;web_id=PF3D7_1207700;locus_tag=PF3D7_1207700;size=2157;Alias=AAA29503.1,160118,PFL0385c,PFL0385c,124805602,811130,23496609,2277.t00078,Q8I0V6,12368864,XP_001350486.1,MAL12P1.77,PF3D7_1207700,AAN36166.1
0.000169958	0.000928936	0.00232234	0.4	Pf3D7_14_v3	2329933	2332086	ID=PF3D7_1456800;Name=PF3D7_1456800;description=V-type+H%28+%29-translocating+pyrophosphatase%2C+putative;size=2154;web_id=PF3D7_1456800;locus_tag=PF3D7_1456800;size=2154;Alias=PF14_0541,11378198,ERGolgiVacuole,812123,PPM,Q8IKR1,PF3D7_1456800,PF14_0541,12368864,AAN37154.1,XP_001348715.1,transporters,124809914,23497614,MCprot
0.00158027	0.000931099	0.00558659	0.166667	Pf3D7_05_v3	1196315	1197389	ID=PF3D7_0529300;Name=PF3D7_0529300;description=apicoplast+TIC22+precursor+%28TIC22%29;size=1075;web_id=PF3D7_0529300;locus_tag=PF3D7_0529300;size=1075;Alias=CAD51654.1,19502580,MAL5P1.290,TIC22,12368867,Q8I3H4,XP_001351847.1,PFE1460w,23504873,PFE1460w,11738814,PF3D7_0529300,813106,124506499
0.000215018	0.000932836	0.000932836	1	Pf3D7_10_v3	540622	541694	ID=PF3D7_1013700;Name=PF3D7_1013700;description=conserved+Plasmodium+protein%2C+unknown+function;size=1073;web_id=PF3D7_1013700;locus_tag=PF3D7_1013700;size=1073;Alias=810292,XP_001347419.1,23494999,AAN35332.1,PF10_0134,PF3D7_1013700,124802252,Q8IJQ8,12368864,PF10_0134
0.000440012	0.000935454	0	Infinity	Pf3D7_12_v3	976820	977889	ID=PF3D7_1224100;Name=PF3D7_1224100;description=conserved+Plasmodium+protein%2C+unknown+function;size=1070;web_id=PF3D7_1224100;locus_tag=PF3D7_1224100;size=1070;Alias=XP_001350638.1,124806140,Q8I5H6,23496763,AAN36318.1,PFL1160c,MAL12P1.232,12368864,PFL1160c,811284,2277.t00232,PF3D7_1224100
0.00159128	0.00093633	0.00093633	1	Pf3D7_02_v3	522931	523999	ID=PF3D7_0212600;Name=PF3D7_0212600;description=secreted+protein+altered+thrombospondin+repeat+protein+%28SPATR%29;size=1069;web_id=PF3D7_0212600;locus_tag=PF3D7_0212600;size=1069;Alias=SPATR,812714,O96207,3845220,9804551,11738814,12368864,18832006,PFB0570w,124801207,PF02_0118,AAC71903.1,PF3D7_0212600,XP_001349632.1,PFB0570w,Merozoiteproteins,proteinsLocalizpath
0.000640916	0.000937031	0.000937031	1	Pf3D7_14_v3	154855	160191	ID=PF3D7_1404600.1;Name=PF3D7_1404600.1;description=adenylyl+cyclase+alpha+%28ACalpha%29;size=5337;web_id=PF3D7_1404600.1;locus_tag=PF3D7_1404600.1;size=5337;Alias=transporters,purinemetpath,PF14_0788,ACalpha,PF3D7_1404600.1,650812,652397,811625,Q8IM48,PF14_0043,PF14_0788
0.000640916	0.000937031	0.000937031	1	Pf3D7_14_v3	154855	160191	ID=PF3D7_1404600.2;Name=PF3D7_1404600.2;description=adenylyl+cyclase+alpha;size=5337;web_id=PF3D7_1404600.2;locus_tag=PF3D7_1404600.2;size=5337;Alias=PF3D7_1404600.2
0.000640916	0.000937031	0.000937031	1	Pf3D7_14_v3	154855	160191	ID=PF3D7_1404600.3;Name=PF3D7_1404600.3;description=adenylyl+cyclase+alpha;size=5337;web_id=PF3D7_1404600.3;locus_tag=PF3D7_1404600.3;size=5337;Alias=PF3D7_1404600.3
3.4387e-05	0.000937207	0	Infinity	Pf3D7_11_v3	470541	471608	ID=PF3D7_1112200;Name=PF3D7_1112200;description=coq4+homolog%2C+putative;size=1068;web_id=PF3D7_1112200;locus_tag=PF3D7_1112200;size=1068;Alias=PF11_0128,PF11_0128,Q8IIP1,12368864,PF3D7_1112200,Q8IIP1.1,810676,XP_001347800.1,124803729,23496051,AAN35713.1,nuclearGenes,74863378
0.000602844	0.000938086	0.00187617	0.5	Pf3D7_13_v3	2778005	2779071	ID=PF3D7_1369700;Name=PF3D7_1369700;description=U1+small+nuclear+ribonucleoprotein+a%2C+putative;size=1067;web_id=PF3D7_1369700;locus_tag=PF3D7_1369700;size=1067;Alias=PF13_0362,CAX64396.1,PF13.0362:1:pep,PF13.0362:mRNA:1,XP_002809115.1,PF3D7_1369700,PF13_0362,PF13.0362,225632065,C0H5L8,296005602,splicing,9222018
0.00143429	0.000938967	0	Infinity	Pf3D7_14_v3	2868291	2869356	ID=PF3D7_1470000;Name=PF3D7_1470000;description=conserved+Plasmodium+protein%2C+unknown+function;size=1066;web_id=PF3D7_1470000;locus_tag=PF3D7_1470000;size=1066;Alias=12368864,PF14_667a,PF3D7_1470000,258549238,8444988,255528928,PF14_0667a,XP_002585478.1,C6S3K2,PF14_667a:mRNA:1,ACU12426.1,PF14_0667a,PF14_667a:1:pep
0.000516086	0.00093985	0	Infinity	Pf3D7_09_v3	751358	752422	ID=PF3D7_0918300;Name=PF3D7_0918300;description=eukaryotic+translation+initiation+factor+3+subunit+5%2C+putative;size=1065;web_id=PF3D7_0918300;locus_tag=PF3D7_0918300;size=1065;Alias=PFI0895c,813459,proteases,PFI0895c,XP_001352054.1,124506914,Q8I2X0,23505083,CAD51865.1,PF3D7_0918300,12368867,intTranslation
[truncated: 4,318 more rows]
