# Supplementary material for: Analysis of pfhrp2 genetic diversity in Senegal and implications for use of rapid diagnostic tests
Source: Malar J. 2014 Jan 29;13:34. doi: 10.1186/1475-2875-13-34 (PMC3913323; doi:10.1186/1475-2875-13-34)
Supplement: Additional file 5 — PfHRP2 Repeat Types. Thee table contains the repeat Types found in the PfHRP2 sequence from Senegal, Mali and Uganda isolates. Each line represents an isolate, with the number of the different repeat Types observed within the sequences indicated. [file 1475-2875-13-34-S5.xlsx]

## Sheet: Additional File 5 
	TYPE 1	TYPE 2	TYPE 3	TYPE4	TYPE 5	TYPE 6	TYPE 7	TYPE 8	TYPE 9	TYPE 10	TYPE 11	TYPE 12	TYPE 13	TYPE 14	TYPE 19	TYPE 20	TYPE 22	TYPE 23	TYPE 24
	AHHAHHVAD	AHHAHHAAD	AHHAHHAAY	AHH	AHHAHHASD	AHHATD	AHHAAD	AHHAAY	AAY	AHHAAAHHATD	AHN	AHHAAAHHEAATH	AHHASD	AHHAHHATD	AHHAA	SHHD	AHHAHHAGD	ARHAAD	AHHTHHAAD
Mean range	0-3	0-11	0-1	0-17	0-2	0-3	0-8	0-2	0-1	0-2	0	0-1	0-1	0	0-5	0	0	0	0
Ref 3D7	3	11	1	1	2	3	5	1	0	2	0	1	0	0	0	0	0	0	0
Mali PS250:CDS	2	4	0	17	0	1	5	1	0	0	0	0	0	0	3	0	0	0	0
Mali PS103:CDS	3	3	0	12	0	1	3	0	0	0	0	1	0	0	4	0	0	0	0
Mali PS189:CDS	2	8	1	6	0	2	2	1	0	0	0	1	0	0	2	0	0	0	0
Mali PS183:CDS	2	3	1	6	1	2	8	1	0	2	0	1	0	0	1	0	0	0	0
Mali PS170:CDS	3	6	0	8	0	2	5	1	0	1	0	1	0	0	1	0	0	0	0
Mali PS206 E11:CDS	2	3	0	10	0	2	6	1	0	2	0	1	0	0	1	0	0	0	0
Mali PS186:CDS	2	4	0	9	0	2	3	0	0	0	0	0	0	0	5	0	0	0	0
Mali PS149:CDS	2	4	1	8	1	0	5	1	0	2	0	1	0	0	1	0	0	0	0
Mali PS122 G11:CDS	2	5	0	12	0	1	2	0	0	1	0	1	0	0	2	0	0	0	0
Mali PS097:CDS	3	3	0	14	0	1	4	2	0	2	0	0	0	0	1	0	0	0	0
Mali PS096:CDS	2	4	1	12	0	2	3	1	0	0	0	0	0	0	3	0	0	0	0
Kampala01:CDS	1	3	1	11	0	1	7	1	0	1	0	0	0	0	0	0	0	0	0
Kampala02:CDS	3	4	0	9	0	1	6	1	0	0	0	0	0	0	1	0	0	0	0
Kampala03:CDS	2	2	0	10	0	1	5	0	0	2	0	1	0	0	4	0	0	0	0
Kampala04:CDS	2	5	0	9	0	2	4	0	0	1	0	0	0	0	5	0	0	0	0
Kampala05:CDS	2	3	1	9	0	1	5	1	0	0	0	1	0	0	3	0	0	0	0
Kampala06:CDS	2	6	1	7	0	2	3	1	0	2	0	1	0	0	3	0	0	0	0
Kampala07:CDS	2	4	0	13	0	0	4	0	0	0	0	0	0	0	3	0	0	0	0
Kampala09:CDS	3	6	0	10	0	1	4	1	0	1	0	1	0	0	1	0	0	0	0
Kampala10:CDS	2	5	0	8	0	1	3	0	0	2	0	0	0	0	3	0	0	0	0
SenP005.02.c	3	7	1	3	1	1	3	1	0	0	0	1	0	0	2	0	0	0	0
SenP008.04.c	1	4	0	7	0	0	3	1	0	1	0	1	0	0	0	0	0	0	0
SenP009.04.c	0	0	0	1	0	0	4	2	0	0	0	0	0	0	0	0	0	0	0
SenP011.02.c	2	6	0	6	1	2	1	2	0	1	0	1	0	0	2	0	0	0	0
SenP019.04.c	3	4	1	4	1	1	3	1	0	1	0	1	0	0	2	0	0	0	0
SenP026.04.c	1	1	1	0	1	0	2	1	0	0	0	0	0	0	0	0	0	0	0
SenP027.02.c	3	6	1	6	0	1	3	1	0	0	0	1	0	0	2	0	0	0	0
SenP031.01.c	2	4	1	5	0	1	2	1	0	1	0	0	0	0	2	0	0	0	0
SenP051.02.c	3	5	0	6	0	3	4	1	0	2	0	1	0	0	4	0	0	0	0
SenP060.02.c	2	6	1	4	1	3	3	1	0	1	0	0	0	0	2	0	0	0	0
SenT002.09.c	2	1	0	6	0	2	2	0	0	0	0	1	0	0	2	0	0	0	0
SenT010.04_D10.c	3	7	1	4	1	1	2	1	0	2	0	1	0	0	1	0	0	0	0
SenT015.04.c	3	11	1	1	1	3	4	1	0	2	0	1	0	0	0	0	0	0	0
SenT015.09.c	2	2	1	12	1	1	0	0	1	1	0	1	0	0	5	0	0	0	0
SenT021.09.c	2	6	0	8	0	1	3	0	0	0	0	1	0	0	3	0	0	0	0
SenT026.04.c	3	5	1	7	0	1	3	0	1	0	0	0	1	0	2	0	0	0	0
SenT028.04.c	3	7	1	5	0	1	2	0	0	0	0	1	0	0	3	0	0	0	0
SenT029.09.c	2	3	1	11	0	2	3	0	1	1	0	1	0	0	3	0	0	0	0
SenT032.09.c	2	3	1	9	1	0	7	1	0	0	0	1	0	0	3	0	0	0	0
SenT033.09.c	2	4	0	10	0	1	4	1	0	2	0	1	0	0	1	0	0	0	0
SenT042.09.c	2	4	1	10	1	1	4	1	0	1	0	1	0	0	1	0	0	0	0
SenT046.09.c	2	6	0	9	0	2	3	1	0	2	0	1	0	0	1	0	0	0	0
SenT047.09.c	2	6	0	7	0	1	4	0	0	2	0	1	0	0	0	0	0	0	0
SenT074.08.c	3	7	1	4	0	2	4	1	0	1	0	1	0	0	3	0	0	0	0
SenT077.09.c	3	5	0	8	1	2	6	1	0	2	0	1	0	0	1	0	0	0	0
SenT079.09.c	3	8	0	5	0	2	5	1	0	2	0	1	0	0	1	0	0	0	0
SenT086.09.c	2	4	1	8	1	1	5	1	0	2	0	1	0	0	1	0	0	0	0
SenT090.09.c	1	6	0	8	0	2	4	1	0	2	0	1	0	0	1	0	0	0	0
SenT092.09.c	2	5	0	6	0	1	3	0	0	2	0	1	0	0	2	0	0	0	0
SenT105.07.c	3	7	0	7	0	2	2	1	0	2	0	0	0	0	2	0	0	0	0
SenT109.09.c	2	2	1	7	1	2	5	1	0	2	0	1	0	0	2	0	0	0	0
SenT111.09.c	2	4	0	10	0	2	6	0	0	2	0	1	0	0	4	0	0	0	0
SenT112.09.c	2	4	1	8	0	2	2	1	0	1	0	1	0	0	0	0	0	0	0
SenT113.09.c	3	0	0	2	0	0	0	0	0	0	0	0	0	0	2	0	0	0	0
SenT123.09.c	2	5	0	12	0	1	3	0	0	0	0	0	0	0	4	0	0	0	0
SenT127.09.c	2	2	1	10	1	2	3	1	0	0	0	1	0	0	1	0	0	0	0
SenT130.09.c	3	5	1	3	2	2	5	1	0	0	0	0	0	0	0	0	0	0	0
SenT135.09.c	2	5	0	12	0	1	1	0	0	0	0	1	0	0	4	0	0	0	0
SenT137.09.c	3	9	1	6	1	1	4	1	0	2	0	1	0	0	0	0	0	0	0
SenT142.09.c	2	5	1	7	1	2	4	1	0	1	0	1	0	0	3	0	0	0	0
SenT148.09.c	2	6	0	4	0	2	3	0	0	2	0	1	0	0	1	0	0	0	0
SenT149.09.c	2	4	1	11	0	1	2	1	0	0	0	1	0	0	3	0	0	0	0
SenT151.09.c	3	7	0	11	0	2	1	0	1	2	0	1	0	0	2	0	0	0	0
SenT153.09.c	2	1	1	8	1	2	6	1	0	1	0	1	0	0	3	0	0	0	0
SenT165.09.c	2	3	0	8	0	2	5	1	0	0	0	1	0	0	3	0	0	0	0
SenT166.09.c	2	5	1	8	0	1	3	1	0	0	0	0	0	0	2	0	0	0	0
SenT230.08.c	1	7	0	3	0	1	7	1	0	2	0	1	0	0	0	0	0	0	0
SenT231.08.c	2	5	0	7	1	1	5	1	0	0	0	0	0	0	1	0	0	0	0
SenT232.08.c	3	6	1	8	0	1	1	1	0	2	0	1	0	0	2	0	0	0	0
SenT250.08.c	2	4	0	8	0	1	2	0	0	1	0	1	0	0	4	0	0	0	0
SenV034.04.c	3	8	1	2	0	2	3	1	0	0	0	0	0	0	3	0	0	0	0
SenV035.04.c	1	4	1	5	1	0	3	1	0	1	0	1	0	0	1	0	0	0	0
SenV042.05.c	1	3	0	1	0	0	1	0	0	0	0	0	0	0	1	0	0	0	0
SenV092.05.c	3	9	0	3	0	0	3	1	0	1	0	1	0	0	1	0	0	0	0
